# Supplementary material for: Expression Profiling Uncovers Novel Genes Associated with Plant Hormone Signal Transduction Involved in Regulation of Anthocyanin Biosynthesis in Red-Fleshed Apple Cultivars
Source: Preprints.org preprint supplement (doi:10.20944/preprints202401.0732.v1), 2024-01-10
Supplement: Supplementary file 1 [file supplementary]

gene_id	baseMean	baseMean_control_Early_Fuji	baseMean_case_Red_Love	foldChange	log2FoldChange	pval	padj	up_down	expression_Early_Fuji_1	expression_Early_Fuji_2	expression_Early_Fuji_3	expression_Red_Love_1	expression_Red_Love_2	expression_Red_Love_3	gene_symbol	description	GO_id	GO_term	pathway	pathway_description
ABI3L1	2.22224773650279	4.44449547300558	0	0	-Inf	0.0355640660378845	0.123134154357849	Down	0.112753	0.0870688	0.126782	0	0	0	Os03g0120900	B3 domain-containing transcription factor NGA1-like	GO:0003677,GO:0005634	DNA binding|nucleus
ARF2	353.409799259748	492.252979498846	214.566619020651	0.435886887346213	-1.19797429070253	4.58872917221748e-08	9.09277229682739e-07	Down	7.10353	5.56445	6.31028	1.71589	2.33315	2.90467	ARF6	auxin response factor 6-like	GO:0003677,GO:0003700,GO:0005634,GO:0009733,GO:0009734,GO:0009908	DNA binding|DNA-binding transcription factor activity|nucleus|response to auxin|auxin-activated signaling pathway|flower development
AUX/IAA7.1	256.366904443374	57.8348628118307	454.898946074918	7.86547981543519	2.97553477660531	5.42056490817953e-33	1.12244411920089e-30	Up	1.30847	0.782259	3.68577	12.6459	12.7451	14.0645	AUX28	auxin-induced protein AUX28	GO:0005634,GO:0006355,GO:0009734	nucleus|regulation of transcription, DNA-templated|auxin-activated signaling pathway	path:mdm04075	Plant hormone signal transduction
BGAL101	2106.85513979654	3765.25076620967	448.459513383408	0.119104819633263	-3.06969630116206	0.0156834479326694	0.0650168962631326	Down	26.3159	103.647	38.7723	7.85685	8.53069	1.70309		beta-galactosidase	GO:0004565,GO:0005975,GO:0048046	beta-galactosidase activity|carbohydrate metabolic process|apoplast
BZIP12	2270.99365907709	3665.2529858574	876.734332296776	0.239201587361011	-2.06370113147902	3.85599388797469e-08	7.73600434687794e-07	Down	52.8009	90.1685	81.8985	18.7563	16.8694	12.6865	RPT2	root phototropism protein 2-like	GO:0005634,GO:0005737,GO:0007165,GO:0009638,GO:0016567	nucleus|cytoplasm|signal transduction|phototropism|protein ubiquitination
BZIP18	20.5888176446353	29.004509924859	12.1731253644116	0.419697674463319	-1.25257762558666	0.0263285103733521	0.0975541303327554	Down	0.468494	0.273409	0.433132	0.242939	0.110256	0.123532	ATHB-8	homeobox-leucine zipper protein ATHB-8-like	GO:0003677,GO:0003700,GO:0005634,GO:0008284,GO:0008289,GO:0009733,GO:0010014,GO:0010067,GO:0010072,GO:0010089,GO:0030154,GO:0045597	DNA binding|DNA-binding transcription factor activity|nucleus|positive regulation of cell proliferation|lipid binding|response to auxin|meristem initiation|procambium histogenesis|primary shoot apical meristem specification|xylem development|cell differentiation|positive regulation of cell differentiation
CYP707A	27.5213082958612	11.5743117545507	43.4683048371718	3.75558441477793	1.9090374261677	0.00194273441152372	0.011851824619123	Up	0.45812	0.12296	0.257144	1.10617	1.22115	0.482853	CYP707A2	abscisic acid 8'-hydroxylase 4	GO:0004497,GO:0005506,GO:0009639,GO:0009687,GO:0010114,GO:0010295,GO:0016021,GO:0016125,GO:0020037,GO:0046345,GO:0048838,GO:0055114	monooxygenase activity|iron ion binding|response to red or far red light|abscisic acid metabolic process|response to red light|(+)-abscisic acid 8'-hydroxylase activity|integral component of membrane|sterol metabolic process|heme binding|abscisic acid catabolic process|release of seed from dormancy|oxidation-reduction process	path:mdm00906	Carotenoid biosynthesis
DOF7	24.162233954564	36.4953343971845	11.8291335119435	0.324127281125997	-1.62536764044949	0.00205745191759668	0.0124084720074829	Down	1.64176	1.51448	2.07577	0.554826	0.468206	0.523901	DOF5.8	dof zinc finger protein DOF3.1	GO:0000976,GO:0003700,GO:0005634,GO:0006355,GO:0046872	transcription regulatory region sequence-specific DNA binding|DNA-binding transcription factor activity|nucleus|regulation of transcription, DNA-templated|metal ion binding
FLS	396.738514263708	580.613608261995	212.863420265422	0.366618035189713	-1.44765033618152	2.72210059775314e-07	4.66393004307704e-06	Down	22.0456	18.7829	15.8231	9.25744	4.93874	4.33722	FLS	flavonol synthase/flavanone 3-hydroxylase	GO:0005737,GO:0009813,GO:0031418,GO:0045486,GO:0046872	cytoplasm|flavonoid biosynthetic process|L-ascorbic acid binding|naringenin 3-dioxygenase activity|metal ion binding	path:mdm00941	Flavonoid biosynthesis
GATA5	5.11077427453372	9.87066701284421	0.350881536223235	0.0355479053002852	-4.81409163982952	0.00160835303677282	0.0100835109290753	Down	0.271495	0.524131	0.190788	0.0350649	0	0	GATA21	GATA binding protein 5	GO:0003700,GO:0005634,GO:0006355,GO:0007623,GO:0008270,GO:0009416,GO:0009658,GO:0009733,GO:0009735,GO:0009736,GO:0009739,GO:0009740,GO:0009910,GO:0009938,GO:0010029,GO:0010151,GO:0010187,GO:0010255,GO:0010380,GO:0010468,GO:0043565,GO:0043610,GO:0044212,GO:0051171,GO:0080050,GO:0090693,GO:1902326,GO:2000028	DNA-binding transcription factor activity|nucleus|regulation of transcription, DNA-templated|circadian rhythm|zinc ion binding|response to light stimulus|chloroplast organization|response to auxin|response to cytokinin|cytokinin-activated signaling pathway|response to gibberellin|gibberellic acid mediated signaling pathway|negative regulation of flower development|negative regulation of gibberell…
GATA7	281.557057171812	171.274660962441	391.839453381183	2.28778414261238	1.19395093713658	2.36290661892018e-07	4.11910179690294e-06	Up	5.41278	4.77878	4.16222	9.51656	7.99147	11.4112	GATA5	GATA transcription factor 5-like	GO:0003700,GO:0005634,GO:0008270,GO:0043565,GO:0045893	DNA-binding transcription factor activity|nucleus|zinc ion binding|sequence-specific DNA binding|positive regulation of transcription, DNA-templated
HD1	213.335543023814	102.95884887138	323.712237176248	3.14409339969062	1.65264407550652	1.0451099778707e-10	3.16260315850434e-09	Up	3.40174	5.32529	4.60913	11.1459	14.9633	13.6753	HAT22	homeobox-leucine zipper protein HAT22-like	GO:0003700,GO:0005634,GO:0009414,GO:0009735,GO:0009737,GO:0009738,GO:0043565	DNA-binding transcription factor activity|nucleus|response to water deprivation|response to cytokinin|response to abscisic acid|abscisic acid-activated signaling pathway|sequence-specific DNA binding
HD14	5813.83078789792	3836.41363479217	7791.24794100366	2.03086754523688	1.0220961490081	2.83289105365454e-05	0.000310493427771059	Up	147.374	116.388	111.48	270.531	175.448	230.31	ATHB-13	homeobox-leucine zipper protein ATHB-13-like	GO:0003700,GO:0005634,GO:0009744,GO:0009965,GO:0043565,GO:0048826,GO:0080022	DNA-binding transcription factor activity|nucleus|response to sucrose|leaf morphogenesis|sequence-specific DNA binding|cotyledon morphogenesis|primary root development
HD16	937.98034673202	1324.18616982407	551.774523639971	0.416689538234099	-1.26295521593462	5.78330821653079e-05	0.000586217151039258	Down	73.331	61.5476	42.5957	23.3378	16.8565	24.5556	HOX22	homeobox-leucine zipper protein ATHB-12-like	GO:0003700,GO:0005634,GO:0043565	DNA-binding transcription factor activity|nucleus|sequence-specific DNA binding
HD19	196.728770748769	340.209216484405	53.2483250131335	0.156516409412366	-2.67561417551346	2.82571356782675e-22	2.82473918383785e-20	Down	11.7079	8.78316	8.52008	1.36337	1.33046	1.63033	ATHB-13	homeobox-leucine zipper protein ATHB-13-like	GO:0003700,GO:0005634,GO:0009744,GO:0009965,GO:0043565,GO:0048826,GO:0080022	DNA-binding transcription factor activity|nucleus|response to sucrose|leaf morphogenesis|sequence-specific DNA binding|cotyledon morphogenesis|primary root development
IAA9	20.7059727664705	8.67767581916947	32.7342697137715	3.77223929493421	1.91542119739814	0.00660787419006099	0.0326118952621498	Up	0.429825	0.229567	0.588822	0.59372	1.06696	2.04071	IAA29	auxin-responsive protein IAA29-like	GO:0003700,GO:0005634,GO:0009733,GO:0009734,GO:0010114,GO:0010218	DNA-binding transcription factor activity|nucleus|response to auxin|auxin-activated signaling pathway|response to red light|response to far red light	path:mdm04075	Plant hormone signal transduction
LAR1	3349.32849063336	6670.27096913068	28.3860121360419	0.00425560104940406	-7.87642137607492	5.10204625986715e-39	1.36952149142175e-36	Down	140.735	239.777	226.999	1.16971	0.803981	0.488508	LAR	leucoanthocyanidin reductase-like	GO:0010023,GO:0033788	proanthocyanidin biosynthetic process|leucoanthocyanidin reductase activity	path:mdm00941	Flavonoid biosynthesis
LIS	52.5730149361462	104.453433956177	0.69259591611497	0.00663066679459808	-7.23663032640736	3.56923677325709e-25	4.44086583934434e-23	Down	2.13773	2.51137	3.19973	0	0	0.0289735		(3S,6E)-nerolidol synthase 1-like	GO:0000287,GO:0005739,GO:0009507,GO:0010333,GO:0016114	magnesium ion binding|mitochondrion|chloroplast|terpene synthase activity|terpenoid biosynthetic process	path:mdm00909	Sesquiterpenoid and triterpenoid biosynthesis
LOC103399998	1731.99306784713	982.357310267816	2481.62882542645	2.52619774850548	1.33696757642624	4.70797345314426e-05	0.000490420950077801	Up	75.3306	75.0117	65.2528	134.806	206.234	141.304		uncharacterized LOC103399998
LOC103400015	253.150769315088	99.5952285715941	406.706310058581	4.08359231553166	2.02983884228835	0.0279871998148889	0.102288063872117	Up	1.25283	2.80864	1.14347	2.77055	9.90229	5.41536	ARR18	two-component response regulator ARR12-like	GO:0000160,GO:0003677,GO:0003700,GO:0005634,GO:0009736	phosphorelay signal transduction system|DNA binding|DNA-binding transcription factor activity|nucleus|cytokinin-activated signaling pathway	path:mdm04075	Plant hormone signal transduction
LOC103400017	31.0077216458983	42.9163587662353	19.0990845255613	0.445030405062873	-1.16802418861748	0.0123130178128883	0.053701577613304	Down	1.22451	0.54482	1.18486	0.407272	0.414975	0.439179	bem46	alpha/beta hydrolase domain-containing protein 17B-like	GO:0005783,GO:0016021,GO:0016788	endoplasmic reticulum|integral component of membrane|hydrolase activity, acting on ester bonds
LOC103400018	143.900653596616	199.887771017364	87.9135361758677	0.439814480537835	-1.1850329903393	8.79496359787715e-06	0.000108681157162173	Down	10.3222	6.43068	7.98468	3.42524	2.98663	2.81171		uncharacterized LOC103400018
LOC103400021	16.7111627212071	27.8792806409181	5.54304480149611	0.198823092779541	-2.33044276301898	0.000324780719478049	0.00259781694949121	Down	0.614897	0.432698	0.46192	0.116552	0.0879383	0.0785154	NCU09302	WD repeat-containing protein 76-like	GO:0003677,GO:0006974,GO:2000001	DNA binding|cellular response to DNA damage stimulus|regulation of DNA damage checkpoint
LOC103400025	195.869310597031	32.7245691114338	359.014052082629	10.9707801150907	3.45559421207391	5.36509913089325e-13	2.1601975528416e-11	Up	0.525012	0.64212	1.11739	6.54317	9.8186	6.26527		naringenin,2-oxoglutarate 3-dioxygenase	GO:0009813,GO:0031418,GO:0045486,GO:0046872	flavonoid biosynthetic process|L-ascorbic acid binding|naringenin 3-dioxygenase activity|metal ion binding	path:mdm00941	Flavonoid biosynthesis
LOC103400026	175.059385333227	108.51791751291	241.600853153543	2.22636831493564	1.1546922818874	0.00816802844209282	0.0387483463485961	Up	6.76368	12.4538	7.71397	17.9711	23.7302	12.3067		uncharacterized LOC103400026
LOC103400029	8.50408688574258	14.6471480561281	2.36102571535703	0.161193544730315	-2.63313412504156	0.019170608270699	0.0761831300572396	Down	1.23656	0.342129	0.79641	0	0.279186	0.250421	OR	protein ORANGE-GREEN, chloroplastic-like	GO:0005634,GO:0009661,GO:0009826,GO:0016021,GO:0031969,GO:1904143	nucleus|chromoplast organization|unidimensional cell growth|integral component of membrane|chloroplast membrane|positive regulation of carotenoid biosynthetic process
LOC103400045	4.1932396265984	7.3338346445271	1.0526446086697	0.143532634657265	-2.80054929871567	0.0463490079501956	0.15106696707928	Down	0.204281	0.197868	0.29524	0.0907954	0	0		uncharacterized LOC103400045
LOC103400054	147.56404448929	201.883605865181	93.2444831133989	0.461872486940163	-1.11443348534728	2.66126888236744e-05	0.00029457878923189	Down	4.11618	4.66852	5.02307	1.77147	1.92672	1.37554	ANTR6	probable anion transporter 6, chloroplastic	GO:0005315,GO:0009536,GO:0016021,GO:0031969	inorganic phosphate transmembrane transporter activity|plastid|integral component of membrane|chloroplast membrane
LOC103400057	137.755012488904	211.348762127744	64.1612628500633	0.303580026701471	-1.71985121957086	3.66403814893496e-10	1.02628469504951e-08	Down	12.3292	8.86346	9.25038	3.19185	2.56629	2.34207	ARPC3	actin-related protein 2/3 complex subunit 3	GO:0003779,GO:0005737,GO:0005885,GO:0007015,GO:0034314,GO:0042995	actin binding|cytoplasm|Arp2/3 protein complex|actin filament organization|Arp2/3 complex-mediated actin nucleation|cell projection	path:mdm04144	Endocytosis
LOC103400073	18.5300533972238	30.4655561205699	6.59455067387764	0.216459225224025	-2.20783280715143	0.000312020914173641	0.00251682980019306	Down	1.09548	0.898111	0.901607	0.201846	0.180843	0.201584	At2g42730	uncharacterized LOC103400073
LOC103400077	4149.3262242522	2665.17411661923	5633.47833188516	2.11373744655423	1.07979618652278	0.000127063930401735	0.0011587239202096	Up	182.947	96.3772	166.406	313.543	302.134	215.267	TPRP-F1	36.4 kDa proline-rich protein-like
LOC103400122	100.754202681116	193.411710030365	8.0966953318668	0.0418624876983698	-4.57819814279027	0.00183119291788786	0.0112829506247756	Down	8.58595	2.01869	2.84863	0.102577	0.0936713	0.315876		uncharacterized LOC103400122
LOC103400130	226.674582832931	77.9894923277527	375.359673338109	4.81295187511481	2.26692199781342	2.40920581498305e-12	9.10598130069866e-11	Up	1.47223	0.644455	0.744182	3.45502	5.46731	4.57594	FRO1	NADH dehydrogenase [ubiquinone] iron-sulfur protein 4, mitochondrial-like	GO:0005739,GO:0005747,GO:0006970,GO:0008137,GO:0009631,GO:0022900,GO:0050897	mitochondrion|mitochondrial respiratory chain complex I|response to osmotic stress|NADH dehydrogenase (ubiquinone) activity|cold acclimation|electron transport chain|cobalt ion binding	path:mdm00190	Oxidative phosphorylation
LOC103400153	7.39600598388217	14.7920119677643	0	0	-Inf	8.359112555594e-06	0.00010388848202757	Down	0.232817	0.267731	0.496179	0	0	0	SPAC17H9.04c	uncharacterized LOC103400153	GO:0003723,GO:0005730,GO:0046872	RNA binding|nucleolus|metal ion binding
LOC103400190	61.3193801418041	19.6337873092248	103.004972974383	5.24631194950285	2.39130359384392	8.89213500716221e-11	2.72497879342106e-09	Up	1.02127	0.764471	1.09351	4.4795	3.88094	4.56418	At5g51370	F-box/LRR-repeat protein 4-like	GO:0006511,GO:0016567,GO:0019005,GO:0031146	ubiquitin-dependent protein catabolic process|protein ubiquitination|SCF ubiquitin ligase complex|SCF-dependent proteasomal ubiquitin-dependent protein catabolic process
LOC103400207	29.9372310227617	41.6353973136182	18.2390647319052	0.438066306765843	-1.19077883875453	0.0096578694840403	0.0443289481225979	Down	0.74067	0.437748	0.63768	0.0878146	0.133448	0.269561	At2g40090	uncharacterized aarF domain-containing protein kinase 1-like	GO:0005215	transporter activity
LOC103400221	1316.40185039586	1911.25410415005	721.549596641667	0.377526774213283	-1.4053491308338	3.47436509594313e-13	1.44715293292229e-11	Down	42.8132	35.0372	37.8316	13.8956	11.5793	13.6774		uncharacterized LOC103400221
LOC103400222	72.0122973584535	114.028652253448	29.9959424634588	0.263056186937891	-1.92655711301596	1.12532644486651e-08	2.4639889453686e-07	Down	2.34447	2.48865	1.50839	0.626971	0.428315	0.478232	CRYD	cryptochrome DASH, chloroplastic/mitochondrial	GO:0003677,GO:0003913,GO:0005739,GO:0006281,GO:0009507,GO:0018298	DNA binding|DNA photolyase activity|mitochondrion|DNA repair|chloroplast|protein-chromophore linkage
LOC103400236	8.18425163861802	13.8974144198749	2.47108885736111	0.177809251613535	-2.49159770373585	0.0070471512275147	0.034334563375152	Down	0.311284	0.229696	0.0804101	0.0248182	0	0.0995687	CRK29	putative receptor-like protein kinase At4g00960
LOC103400239	31.8440140382631	12.8843488630759	50.8036792134504	3.94305368112503	1.97931335157322	0.000198596384609389	0.00170738706697099	Up	0.436242	0.948846	0.665715	1.50169	3.18245	2.57192	ATJ11	chaperone protein dnaJ 11, chloroplastic-like	GO:0005634,GO:0009507,GO:0009536,GO:0009570	nucleus|chloroplast|plastid|chloroplast stroma
LOC103400255	24.6630826697051	33.5903031450394	15.7358621943708	0.46846442934513	-1.09398858714295	0.0318886817309553	0.113124435068575	Down	1.61744	0.699126	1.49634	0.503538	0.303102	0.636483	SNRNP25	uncharacterized LOC103400255	GO:0005681,GO:0006397,GO:0008380	spliceosomal complex|mRNA processing|RNA splicing
LOC103400276	1738.91244485664	1130.96281405894	2346.86207565435	2.0751010081681	1.05318156317595	2.68797352616113e-08	5.50702137974636e-07	Up	34.3699	35.2118	36.668	67.949	59.9409	68.0632	FLCY	farnesylcysteine lyase	GO:0001735,GO:0005764,GO:0005773,GO:0005774,GO:0009738,GO:0030327,GO:0030328,GO:0045338,GO:0102149	prenylcysteine oxidase activity|lysosome|vacuole|vacuolar membrane|abscisic acid-activated signaling pathway|prenylated protein catabolic process|prenylcysteine catabolic process|farnesyl diphosphate metabolic process|farnesylcysteine lyase activity	path:mdm00900	Terpenoid backbone biosynthesis
LOC103400282	304.953190443758	415.858486643432	194.047894244084	0.466620017329275	-1.09967989669033	9.10821560827385e-07	1.41960844346161e-05	Down	6.76469	5.35563	6.0431	1.90528	2.31749	2.9748	PXM16	insulin-degrading enzyme-like 1, peroxisomal	GO:0004222,GO:0005739,GO:0005777,GO:0046872,GO:0051603	metalloendopeptidase activity|mitochondrion|peroxisome|metal ion binding|proteolysis involved in cellular protein catabolic process
LOC103400315	3.38983550954297	6.77967101908593	0	0	-Inf	0.00475090329654143	0.0249012270053763	Down	0.609027	0.297969	0.172587	0	0	0		uncharacterized LOC103400315
LOC103400323	4.37040942371307	8.38190889115958	0.358909956266557	0.0428195964579262	-4.54558499028885	0.00885430033061047	0.0413143677103489	Down	0.969429	0.350738	0.135927	0	0	0	RPPL1	putative disease resistance RPP13-like protein 1
LOC103400341	3128.48688825342	1362.3510168225	4894.62275968435	3.59277653060398	1.84509920302286	4.07048269117625e-22	4.02741615075766e-20	Up	5.13081	5.41395	4.84323	53.4094	38.8618	50.0314		short stature homeobox protein 2-like
LOC103400372	93.3593226267658	136.048056030899	50.6705892226329	0.372446256866211	-1.4248958318532	3.15509661490368e-06	4.3287388010439e-05	Down	4.03306	2.73259	3.35421	1.16633	1.0234	1.11331	VRN2	polycomb group protein EMBRYONIC FLOWER 2-like	GO:0003700,GO:0005634,GO:0005677,GO:0006349,GO:0009409,GO:0010048,GO:0031490,GO:0046872	DNA-binding transcription factor activity|nucleus|chromatin silencing complex|regulation of gene expression by genetic imprinting|response to cold|vernalization response|chromatin DNA binding|metal ion binding
LOC103400377	4.33524256306092	8.67048512612183	0	0	-Inf	0.00100146207582317	0.00678025693327528	Down	0.183803	0.177911	0.0941481	0	0	0		uncharacterized LOC103400377	GO:0003743,GO:0006417	translation initiation factor activity|regulation of translation
LOC103400378	3.45069162525907	0.606127383739267	6.29525586677887	10.386027814719	3.37657208909829	0.0413149553403846	0.138288945308596	Up	0.492741	0	0	0.246428	0	0.517448		uncharacterized LOC103400378
LOC103400427	54.3181160175447	0.951443493896027	107.684788541193	113.180435025352	6.8224807775255	3.53007484551823e-11	1.15896794758294e-09	Up	0.0804384	0.0193273	0.0224675	1.43692	2.53553	1.36232		ent-kaur-16-ene synthase, chloroplastic-like	GO:0000287,GO:0009507,GO:0009686,GO:0009899	magnesium ion binding|chloroplast|gibberellin biosynthetic process|ent-kaurene synthase activity	path:mdm00904	Diterpenoid biosynthesis
LOC103400428	17.9653403632491	27.8225407657236	8.10813996077465	0.29142341919986	-1.77881127580379	0.00288647350288472	0.0164657353106313	Down	0.747552	0.702211	0.552446	0.193313	0.0441724	0.14844	GLCAT14B	beta-glucuronosyltransferase GlcAT14B-like	GO:0000139,GO:0008375,GO:0015020,GO:0016021	Golgi membrane|acetylglucosaminyltransferase activity|glucuronosyltransferase activity|integral component of membrane
LOC103400446	2.92116980429744	0	5.84233960859488	Inf	Inf	0.00867284070917806	0.0406180375055043	Up	0	0	0	0.202078	0.414523	0.2058		uncharacterized LOC103400446	GO:0003774,GO:0005874,GO:0005930,GO:0007017,GO:0030286,GO:0031514,GO:0044458,GO:0097014	motor activity|microtubule|axoneme|microtubule-based process|dynein complex|motile cilium|motile cilium assembly|ciliary plasm
LOC103400467	28.9333429447418	51.9200340863516	5.94665180313199	0.114534820860127	-3.12614182193546	6.15592395634704e-09	1.39640246865807e-07	Down	1.33398	0.856334	1.31701	0.269012	0.0487786	0.0547908	At3g10130	heme-binding-like protein At3g10130, chloroplastic	GO:0009507,GO:0009535,GO:0010287,GO:0020037	chloroplast|chloroplast thylakoid membrane|plastoglobule|heme binding
LOC103400502	69.1834456090943	105.325355543301	33.0415356748875	0.313709225138134	-1.67250014025048	0.000480072485701671	0.00362996905594456	Down	1.05545	2.42216	1.71073	0.559716	0.507677	0.449952	NYC1	probable chlorophyll(ide) b reductase NYC1, chloroplastic	GO:0009535,GO:0009536,GO:0010304,GO:0015996,GO:0016021,GO:0016491,GO:0034256	chloroplast thylakoid membrane|plastid|PSII associated light-harvesting complex II catabolic process|chlorophyll catabolic process|integral component of membrane|oxidoreductase activity|chlorophyll(ide) b reductase activity	path:mdm00860	Porphyrin and chlorophyll metabolism
LOC103400510	4.57297339530877	0	9.14594679061754	Inf	Inf	0.024623862692797	0.0927433778698434	Up	0	0	0	0.247981	0.901314	0.100987		uncharacterized LOC103400510
LOC103400512	46.7645460518257	22.0003523452711	71.5287397583802	3.2512542815595	1.70099639404695	0.0138698025708409	0.0591021207058042	Up	0.921419	0.146838	0.515138	1.71815	1.80737	0.745376	YUC2	indole-3-pyruvate monooxygenase YUCCA2-like	GO:0004499,GO:0009851,GO:0050660,GO:0050661,GO:0103075	N,N-dimethylaniline monooxygenase activity|auxin biosynthetic process|flavin adenine dinucleotide binding|NADP binding|indole-3-pyruvate monooxygenase activity	path:mdm00380	Tryptophan metabolism
LOC103400515	428.737116167195	812.084061731481	45.3901706029095	0.055893438551338	-4.16117725778051	8.63212835845615e-62	5.95822383599152e-59	Down	16.3429	15.9088	18.5344	0.583086	1.0075	0.818827	CIPK24	CBL-interacting serine/threonine-protein kinase 24-like	GO:0004672,GO:0004674,GO:0005524,GO:0005634,GO:0005737,GO:0006468,GO:0009651,GO:0009705,GO:0035556	protein kinase activity|protein serine/threonine kinase activity|ATP binding|nucleus|cytoplasm|protein phosphorylation|response to salt stress|plant-type vacuole membrane|intracellular signal transduction
LOC103400517	213.086555948545	321.035371295317	105.137740601772	0.327495815110842	-1.61045162352708	3.86939726120896e-11	1.25755410989291e-09	Down	4.95746	4.78825	4.50828	1.73259	1.12736	1.54961	At1g65240	aspartic proteinase-like protein 2	GO:0004190,GO:0005886,GO:0006508,GO:0030163,GO:0031225,GO:0046658	aspartic-type endopeptidase activity|plasma membrane|proteolysis|protein catabolic process|anchored component of membrane|anchored component of plasma membrane
LOC103400552	32.2756875405644	53.1625744621733	11.3888006189555	0.214225904862056	-2.22279514908344	3.37365457003001e-06	4.60245863459623e-05	Down	1.32929	0.972104	1.03575	0.401606	0.21278	0.0433728	UBC37	uncharacterized LOC103400552	GO:0005524,GO:0005634,GO:0006974,GO:0061631	ATP binding|nucleus|cellular response to DNA damage stimulus|ubiquitin conjugating enzyme activity
LOC103400556	31.5864777086583	10.8740212296323	52.2989341876844	4.80953026330011	2.26589599588711	3.77452169447275e-06	5.06355316625474e-05	Up	0.211986	0.146511	0.119453	0.475062	0.74143	0.764821	CES101	G-type lectin S-receptor-like serine/threonine-protein kinase CES101
LOC103400560	424.443349024138	229.276331012893	619.610367035384	2.70246110576735	1.43427385462215	4.64666968577683e-05	0.000485226403868378	Up	3.92846	3.30325	3.8373	6.4979	8.5469	11.5506		uncharacterized LOC103400560
LOC103400575	87.3346715380899	137.254383093171	37.4149599830091	0.272595738947084	-1.87516508391062	1.46631417691421e-07	2.65015261775205e-06	Down	2.89282	1.84846	2.10765	0.527519	0.423767	0.761879		probable serine incorporator
LOC103400609	574.871650346262	916.31426145756	233.429039234963	0.254747796747868	-1.97285842596308	1.0715920689011e-20	9.41377396286152e-19	Down	8.75822	9.38765	9.91019	3.10902	1.50873	1.67407	At1g74260	probable phosphoribosylformylglycinamidine synthase, chloroplastic/mitochondrial	GO:0004642,GO:0005524,GO:0005737,GO:0005739,GO:0006189,GO:0006541,GO:0009507,GO:0009555,GO:0009570,GO:0046872,GO:0055046	phosphoribosylformylglycinamidine synthase activity|ATP binding|cytoplasm|mitochondrion|'de novo' IMP biosynthetic process|glutamine metabolic process|chloroplast|pollen development|chloroplast stroma|metal ion binding|microgametogenesis	path:mdm00230	Purine metabolism
LOC103400616	481.504648929755	948.826028315965	14.1832695435454	0.014948229833786	-6.06388153887799	2.4068727590467e-35	5.49411348698929e-33	Down	77.1522	67.9096	48.246	1.04351	0.956293	0.600978		cysteine proteinase inhibitor B	GO:0004869	cysteine-type endopeptidase inhibitor activity
LOC103400651	89.8151045430923	55.2901071166854	124.340101969499	2.24886708407146	1.16919839530088	0.000145269609961973	0.00130221582956017	Up	0.482892	0.53066	0.320425	1.03593	0.908107	1.00488	ATX2	histone-lysine N-methyltransferase ATX2	GO:0005634,GO:0006355,GO:0042800,GO:0046872,GO:0051568	nucleus|regulation of transcription, DNA-templated|histone methyltransferase activity (H3-K4 specific)|metal ion binding|histone H3-K4 methylation
LOC103400658	74.0369172842887	27.8745045240217	120.199330044556	4.3121602373585	2.10841078879248	9.17950888242527e-05	0.000874511871513337	Up	0.942241	0.658773	0.331872	3.66568	2.16666	1.84786	UGT92A1	UDP-glycosyltransferase 92A1-like	GO:0008194,GO:0016758,GO:0043231	UDP-glycosyltransferase activity|transferase activity, transferring hexosyl groups|intracellular membrane-bounded organelle
LOC103400659	303.196808388975	104.989756101874	501.403860676076	4.77574078931616	2.25572453423324	7.19333524369003e-22	6.90512545412496e-20	Up	13.694	15.2279	14.4408	32.1888	42.6247	40.8158	CTL1	chitinase-like protein 1	GO:0005794,GO:0006032,GO:0009408,GO:0009414,GO:0009651,GO:0009735,GO:0009825,GO:0009873,GO:0010053,GO:0010167,GO:0010337,GO:0016998,GO:0030244,GO:0030247,GO:0048046	Golgi apparatus|chitin catabolic process|response to heat|response to water deprivation|response to salt stress|response to cytokinin|multidimensional cell growth|ethylene-activated signaling pathway|root epidermal cell differentiation|response to nitrate|regulation of salicylic acid metabolic process|cell wall macromolecule catabolic process|cellulose biosynthetic process|polysaccharide binding|…
LOC103400678	353.599211184431	133.153940742481	574.044481626381	4.31113400343577	2.10806740665643	1.63148149155201e-20	1.39107789529684e-18	Up	2.39293	1.89165	2.13071	9.91287	8.78475	8.36439	ABCF3	ABC transporter F family member 3-like	GO:0005215,GO:0005524,GO:0005829,GO:0016887,GO:0042742,GO:0046686	transporter activity|ATP binding|cytosol|ATPase activity|defense response to bacterium|response to cadmium ion
LOC103400700	154.995174628497	233.276358976042	76.7139902809524	0.328854542387774	-1.60447849688184	1.88238106899262e-09	4.72878918458372e-08	Down	2.70681	2.61867	3.14102	0.83293	1.00937	0.649463		sec-independent protein translocase protein TatB
LOC103400703	6.53914532844831	11.2917692956072	1.78652136128946	0.158214475917824	-2.66004648888566	0.012267522568168	0.0535595601281915	Down	0.313106	0.536604	0.390687	0.0359535	0	0.146123	At5g08460	GDSL esterase/lipase At5g08460	GO:0005576,GO:0016042,GO:0016788	extracellular region|lipid catabolic process|hydrolase activity, acting on ester bonds
LOC103400708	11.3168167614983	19.7956062893257	2.83802723367099	0.143366522459145	-2.80221991548323	0.000530445136802716	0.00394196475670616	Down	0.529926	0.409642	0.327499	0	0.0250635	0.0563015	RDR3	uncharacterized LOC103400708	GO:0003723,GO:0003968,GO:0005634,GO:0030422,GO:0031380,GO:0070919	RNA binding|RNA-directed 5'-3' RNA polymerase activity|nucleus|production of siRNA involved in RNA interference|nuclear RNA-directed RNA polymerase complex|production of siRNA involved in chromatin silencing by small RNA
LOC103400730	8.85497333070195	13.8949468083176	3.81499985308626	0.274560234430157	-1.86480540510786	0.0325038335286169	0.114912943170074	Down	0.809557	0.631809	0.789206	0.165752	0.202683	0.05714		profilin-4	GO:0003779,GO:0005737,GO:0005856	actin binding|cytoplasm|cytoskeleton
LOC103400740	533.108054377936	987.431059760387	78.7850489954855	0.0797878983213306	-3.64768624477784	9.87194995058782e-27	1.35634042212105e-24	Down	27.2135	35.3999	25.6519	1.37707	3.42895	1.24191	MIOX2	inositol oxygenase 1-like	GO:0005506,GO:0005737,GO:0019310,GO:0019853,GO:0050113	iron ion binding|cytoplasm|inositol catabolic process|L-ascorbic acid biosynthetic process|inositol oxygenase activity	path:mdm00053,path:mdm00562	Ascorbate and aldarate metabolism|Inositol phosphate metabolism
LOC103400741	827.874977944704	1141.61336864929	514.136587240117	0.450359641327976	-1.15085054780851	0.00133742067033308	0.00864477708650077	Down	27.9964	19.0538	30.7615	16.1628	7.19967	8.57322	At2g19810	zinc finger CCCH domain-containing protein 20	GO:0003677,GO:0003700,GO:0003727,GO:0005886,GO:0006355,GO:0006979,GO:0046872	DNA binding|DNA-binding transcription factor activity|single-stranded RNA binding|plasma membrane|regulation of transcription, DNA-templated|response to oxidative stress|metal ion binding
LOC103400744	41.6518730523033	68.2249499373129	15.0787961672937	0.221015862688775	-2.17777817684911	3.64872175742857e-07	6.10786371466385e-06	Down	3.00248	1.9398	3.54017	0.758418	0.343686	0.72304	MND1	meiotic nuclear division protein 1 homolog	GO:0003690,GO:0005730,GO:0006302,GO:0007131,GO:0009553,GO:0009555,GO:0010212	double-stranded DNA binding|nucleolus|double-strand break repair|reciprocal meiotic recombination|embryo sac development|pollen development|response to ionizing radiation
LOC103400753	3.15015044510402	6.30030089020805	0	0	-Inf	0.00750530017304953	0.0361907272150209	Down	0.248257	0.160571	0.18684	0	0	0	At4g26220	probable caffeoyl-CoA O-methyltransferase At4g26220	GO:0005829,GO:0008757,GO:0009809,GO:0042409,GO:0046872	cytosol|S-adenosylmethionine-dependent methyltransferase activity|lignin biosynthetic process|caffeoyl-CoA O-methyltransferase activity|metal ion binding	path:mdm00940,path:mdm00941,path:mdm00945	Phenylpropanoid biosynthesis|Flavonoid biosynthesis|Stilbenoid, diarylheptanoid and gingerol biosynthesis
LOC103400755	1051.40704393112	1678.30939919584	424.504688666406	0.252935894221772	-1.98315630999692	0.00211796747152616	0.0127095584764114	Down	24.5898	14.9715	9.39822	4.12036	2.7302	4.23384	IST1	filaggrin	GO:0005737,GO:0005768,GO:0015031,GO:0032511	cytoplasm|endosome|protein transport|late endosome to vacuole transport via multivesicular body sorting pathway	path:mdm04144	Endocytosis
LOC103400771	7.29208882953094	2.15645453292087	12.427723126141	5.76303508208353	2.52682880205912	0.0114479870760898	0.0507457408770405	Up	0.0627619	0.0602076	0	0.227431	0.2635	0.360286	PHP5	pseudo histidine-containing phosphotransfer protein 5-like	GO:0000160,GO:0005634,GO:0005737,GO:0009736,GO:0009927,GO:0043424	phosphorelay signal transduction system|nucleus|cytoplasm|cytokinin-activated signaling pathway|histidine phosphotransfer kinase activity|protein histidine kinase binding	path:mdm04075	Plant hormone signal transduction
LOC103400789	16.9072418789353	9.8259469829998	23.9885367748708	2.44134604190051	1.28767680046562	0.0336179500921863	0.117817259812921	Up	0.181139	0.351087	0.339321	0.439455	0.712746	0.733293	COAC2	mitochondrial carrier protein CoAc2	GO:0005739,GO:0005743,GO:0015228,GO:0016021,GO:1990559	mitochondrion|mitochondrial inner membrane|coenzyme A transmembrane transporter activity|integral component of membrane|mitochondrial coenzyme A transmembrane transport
LOC103400792	719.251962816462	1189.25330072064	249.250624912284	0.209585817219299	-2.25438700262882	6.12928389336597e-05	0.000615902738539617	Down	48.6483	27.7722	57.6781	9.09377	14.36	1.36867	ACO1	1-aminocyclopropane-1-carboxylate oxidase 1	GO:0006952,GO:0009693,GO:0009815,GO:0031418,GO:0046872,GO:0051213,GO:0051365,GO:0071281,GO:0071398,GO:0071732	defense response|ethylene biosynthetic process|1-aminocyclopropane-1-carboxylate oxidase activity|L-ascorbic acid binding|metal ion binding|dioxygenase activity|cellular response to potassium ion starvation|cellular response to iron ion|cellular response to fatty acid|cellular response to nitric oxide	path:mdm00270	Cysteine and methionine metabolism
LOC103400799	243.96621297958	334.197168288004	153.735257671156	0.460013645413865	-1.12025143832872	1.93472431867599e-06	2.79599491517533e-05	Down	11.282	10.0964	11.4137	4.41568	4.56308	4.4404		uncharacterized LOC103400799
LOC103400826	84.7947874879279	134.519560809172	35.0700141666843	0.260705684405514	-1.93950605526575	1.70036303712039e-09	4.31264430849695e-08	Down	3.22524	3.52402	3.18628	0.794578	0.771525	0.859711	THO6	THO complex subunit 6	GO:0000347,GO:0003723,GO:0005634,GO:0006397,GO:0008380,GO:0009738,GO:0009788,GO:0010267,GO:0016567,GO:0031047,GO:0051028,GO:0080008	THO complex|RNA binding|nucleus|mRNA processing|RNA splicing|abscisic acid-activated signaling pathway|negative regulation of abscisic acid-activated signaling pathway|production of ta-siRNAs involved in RNA interference|protein ubiquitination|gene silencing by RNA|mRNA transport|Cul4-RING E3 ubiquitin ligase complex	path:mdm03013	RNA transport
LOC103400832	131.869206276735	200.716968196265	63.0214443572052	0.313981647508653	-1.67124786004448	4.32760125037027e-06	5.73911986496954e-05	Down	8.4792	6.55702	11.686	3.12759	2.82928	1.45484		uncharacterized LOC103400832
LOC103400840	121.241081907172	235.836026411343	6.6461374030021	0.0281811795429846	-5.1491241918532	9.98573720729799e-39	2.60798668143756e-36	Down	4.31536	3.47743	5.03117	0.139079	0.0553412	0.103758		SH3 and multiple ankyrin repeat domains protein 1
LOC103400844	48.2900413367249	19.1690107080664	77.4110719653834	4.0383446566081	2.01376404419099	0.000187734999023682	0.00162703665820524	Up	0.605747	0.31546	0.183104	1.15465	0.854734	1.34703	NFYA3	nuclear transcription factor Y subunit A-4-like	GO:0003677,GO:0003700,GO:0016602	DNA binding|DNA-binding transcription factor activity|CCAAT-binding factor complex
LOC103400846	13.8815198491956	4.87190184358536	22.8911378548057	4.69860407490467	2.23223220501572	0.00118802880103215	0.00784710752834862	Up	0.0386311	0.0936297	0.174978	0.548125	0.404191	0.327678		ankyrin repeat-containing protein BDA1-like
LOC103400852	23.5423766115092	37.8138251865984	9.27092803642008	0.245172975510179	-2.028128129913	0.000224587041611224	0.00189597505425433	Down	0.789768	0.44377	0.785071	0.0410041	0.132842	0.127624	BRXL4	protein Brevis radix-like 4	GO:0005634	nucleus
LOC103400855	37.2347506380238	63.0657825532936	11.403718722754	0.18082259921404	-2.46735309779506	7.02664488489908e-08	1.34189503709375e-06	Down	3.91566	3.77548	3.98235	0.829011	0.540123	0.362449	EL5.1	RING-H2 finger protein ATL33-like	GO:0004842,GO:0005886,GO:0006511,GO:0016021,GO:0016567,GO:0046872,GO:0048364,GO:0051301,GO:0061630	ubiquitin-protein transferase activity|plasma membrane|ubiquitin-dependent protein catabolic process|integral component of membrane|protein ubiquitination|metal ion binding|root development|cell division|ubiquitin protein ligase activity
LOC103400900	7.43013477086885	13.4578821331329	1.40238740860476	0.104205653960375	-3.26249453781507	0.00193431699389474	0.0118079279117727	Down	0.180464	0.162717	0.148668	0.0125436	0.0113275	0.0127095	NACK2	kinesin-like protein KIN-7B	GO:0000919,GO:0003777,GO:0005524,GO:0005634,GO:0005874,GO:0007018,GO:0008017,GO:0009524	cell plate assembly|microtubule motor activity|ATP binding|nucleus|microtubule|microtubule-based movement|microtubule binding|phragmoplast
LOC103400901	529.749203350068	733.515707804088	325.982698896048	0.44441134038143	-1.17003246334644	0.000660308835457177	0.00475693931870028	Down	11.7762	9.32003	9.49652	6.79452	1.77658	3.6762	SUCS	sucrose synthase	GO:0005985,GO:0016157	sucrose metabolic process|sucrose synthase activity	path:mdm00500	Starch and sucrose metabolism
LOC103400911	19767.5765788227	29435.5916857912	10099.5614718543	0.343107133013039	-1.54326897582488	5.22652656051867e-17	3.41254515741974e-15	Down	1519.95	1639.92	1712.68	607.101	458.677	509.524	PMEI3	pectinesterase inhibitor 3-like	GO:0004857,GO:0043086,GO:0048046,GO:1902183	enzyme inhibitor activity|negative regulation of catalytic activity|apoplast|regulation of shoot apical meristem development
LOC103400918	365.1592022213	614.233082728098	116.085321714501	0.188992297840604	-2.40360065458698	0.00241441784453825	0.0142004409237501	Down	44.6096	16.8238	21.8766	2.1566	5.28123	6.49469	FLZ14	FCS-Like Zinc finger 13-like	GO:0005634,GO:0005737,GO:0009744,GO:0009749,GO:0042594,GO:0046872,GO:1905582	nucleus|cytoplasm|response to sucrose|response to glucose|response to starvation|metal ion binding|response to mannose
LOC103400926	217.268302772819	73.8320979602441	360.704507585394	4.8854701078604	2.28849739323698	0.000178117388551473	0.00155859435379029	Up	2.71611	2.11814	4.15433	8.62956	18.1639	11.5189	RD22	BURP domain protein RD22-like	GO:0005768,GO:0005794,GO:0005802,GO:0009651	endosome|Golgi apparatus|trans-Golgi network|response to salt stress
LOC103400937	107950.448646875	61367.2756699153	154533.621623834	2.51817633970009	1.33237931383654	3.4572686216179e-13	1.44210384662882e-11	Up	2013.99	1629.57	1634.67	4091.68	3799.39	3988.47	At3g45310	thiol protease aleurain-like	GO:0004197,GO:0005615,GO:0005764,GO:0051603	cysteine-type endopeptidase activity|extracellular space|lysosome|proteolysis involved in cellular protein catabolic process
LOC103400943	149.90313655848	86.9425092553805	212.863763861579	2.44832781667623	1.29179673933359	1.04738742827026e-06	1.60230931638812e-05	Up	1.62709	2.59685	1.69789	3.82661	4.1649	5.35129		uncharacterized LOC103400943
LOC103400954	8.65268947677793	2.79759060649357	14.5077883470623	5.1858153631871	2.37457084110129	0.00835810053582677	0.0394434860057982	Up	0.046356	0.268501	0.0519279	0.671846	0.783801	0.486689		uncharacterized LOC103400954
LOC103400967	8.22539399008162	3.06564560852977	13.3851423716335	4.36617407256436	2.12636964948105	0.0366386564482739	0.126011940969921	Up	0.143253	0.0470624	0.0272822	0.473071	0.0931523	0.260538	GATA5	GATA transcription factor 5	GO:0003700,GO:0005634,GO:0008270,GO:0043565,GO:0045893	DNA-binding transcription factor activity|nucleus|zinc ion binding|sequence-specific DNA binding|positive regulation of transcription, DNA-templated
LOC103400994	3473.55167693167	1940.46868514218	5006.63466872117	2.58011618896819	1.36743603521204	8.47993209542071e-06	0.000105146805580088	Up	28.8076	25.358	16.9299	48.5779	46.585	69.8725		uncharacterized LOC103400994
LOC103401008	5.08012141390093	9.45045133531207	0.709791492489792	0.0751066237268078	-3.73491604373387	0.00611501984413528	0.030734123661838	Down	0.0707649	0.181088	0.158098	0	0	0.0246981		G2/mitotic-specific cyclin-2-like	GO:0005634,GO:0007049,GO:0051301	nucleus|cell cycle|cell division
LOC103401023	5.96886726074116	11.9377345214823	0	0	-Inf	7.3056264467778e-05	0.00071988480860669	Down	0.0875918	0.185196	0.215718	0	0	0	SULTR1	sulfate transporter 1.3-like	GO:0005886,GO:0008271,GO:0009970,GO:0015116,GO:0015293,GO:0015301,GO:0016021	plasma membrane|secondary active sulfate transmembrane transporter activity|cellular response to sulfate starvation|sulfate transmembrane transporter activity|symporter activity|anion:anion antiporter activity|integral component of membrane
LOC103401025	87.4001127424585	48.6565099616707	126.143715523246	2.59253521517709	1.37436358572753	1.11586729247946e-05	0.000134339671133636	Up	1.29182	1.24268	1.11301	3.09831	2.00156	3.24646		uncharacterized LOC103401025
LOC103401038	362.740217612302	51.1194936088293	674.360941615775	13.1918548876098	3.72157552899998	2.71532914964869e-41	8.19972833836619e-39	Up	0.805879	0.398543	0.897832	7.71277	8.77943	6.82979	PLDDELTA	phospholipase D delta	GO:0004630,GO:0005509,GO:0005773,GO:0005886,GO:0009409,GO:0009506,GO:0009789,GO:0012501,GO:0016020,GO:0016042,GO:0046470,GO:0046473,GO:0070290,GO:0090333	phospholipase D activity|calcium ion binding|vacuole|plasma membrane|response to cold|plasmodesma|positive regulation of abscisic acid-activated signaling pathway|programmed cell death|membrane|lipid catabolic process|phosphatidylcholine metabolic process|phosphatidic acid metabolic process|N-acylphosphatidylethanolamine-specific phospholipase D activity|regulation of stomatal closure	path:mdm00564,path:mdm00565,path:mdm04144	Glycerophospholipid metabolism|Ether lipid metabolism|Endocytosis
LOC103401050	9.75140581710983	2.71308576991932	16.7897258643004	6.18842428442638	2.62957211276204	0.0396156748493557	0.133977883094123	Up	0.208698	0.336653	0	0.358096	1.70363	1.02056		uncharacterized LOC103401050
LOC103401056	70.9752645522933	45.5377490065327	96.4127800980538	2.11720566346445	1.08216141825846	0.00104120587629966	0.00702293121310542	Up	1.46964	0.872762	0.965994	2.02459	2.23278	1.99423	At3g51320	pentatricopeptide repeat-containing protein At3g51320
LOC103401065	48.5157934850052	11.7336631230943	85.2979238469161	7.26950509419619	2.86185714922703	0.000227613324320639	0.00191675443069932	Up	0.158401	0.185589	0.196408	1.009	0.737231	1.8622	MIK2	MDIS1-interacting receptor like kinase 2-like
LOC103401068	65.1111572496393	20.2569227968348	109.965391702444	5.42853387976709	2.44056261239577	0.0199891730434118	0.0787987661855464	Up	1.10851	0.444831	0.227568	1.22783	2.46275	5.09316	TLP1	thaumatin-like protein 1	GO:0006952,GO:0009617,GO:0009723	defense response|response to bacterium|response to ethylene
LOC103401089	7370.72211092205	2626.75689902426	12114.6873228198	4.61203217066642	2.20540257636762	4.06311668086151e-31	7.55062516526765e-29	Up	55.042	72.647	59.1562	282.217	225.922	262.592	ALDH3F1	aldehyde dehydrogenase family 3 member F1-like	GO:0004028,GO:0004029,GO:0005783,GO:0006081,GO:0016020,GO:0043878	3-chloroallyl aldehyde dehydrogenase activity|aldehyde dehydrogenase (NAD) activity|endoplasmic reticulum|cellular aldehyde metabolic process|membrane|glyceraldehyde-3-phosphate dehydrogenase (NAD+) (non-phosphorylating) activity	path:mdm00010,path:mdm00053,path:mdm00071,path:mdm00280,path:mdm00310,path:mdm00330,path:mdm00340,path:mdm00380,path:mdm00410,path:mdm00561,path:mdm00620,path:mdm00903	Glycolysis / Gluconeogenesis|Ascorbate and aldarate metabolism|Fatty acid degradation|Valine, leucine and isoleucine degradation|Lysine degradation|Arginine and proline metabolism|Histidine metabolism|Tryptophan metabolism|beta-Alanine metabolism|Glycerolipid metabolism|Pyruvate metabolism|Limonene and pinene degradation
LOC103401096	114.80243724728	74.2596634370421	155.345211057518	2.09191913708606	1.06482708543779	0.000130586469667012	0.00118711249785095	Up	2.96518	2.57907	3.66106	5.39402	6.74996	5.33771	RTH	protein RTE1-HOMOLOG	GO:0016021	integral component of membrane	path:mdm04016	MAPK signaling pathway - plant
LOC103401120	299.598440823876	64.53276178293	534.664119864823	8.28515788094243	3.05052918952669	2.28809449356723e-35	5.26443328321539e-33	Up	1.7424	0.953413	4.1515	44.7343	31.7701	47.6292	SAUR21	auxin-responsive protein SAUR21-like	GO:0005886,GO:0007275,GO:0009734,GO:0040008	plasma membrane|multicellular organism development|auxin-activated signaling pathway|regulation of growth	path:mdm04075	Plant hormone signal transduction
LOC103401144	744.803223219042	77.8250890078449	1411.78135743024	18.1404399972858	4.18113754381906	1.98012250844765e-14	9.66393123230595e-13	Up	1.21076	3.34759	3.4736	56.3281	46.915	29.5553		dehydrin Xero 1
LOC103401149	774.449869448761	472.115596620231	1076.78414227729	2.28076375782911	1.18951701961841	0.000793372169656126	0.00558283808098969	Up	8.78399	15.4311	12.6064	20.6816	31.7885	21.4882	TULP5	tubby-like F-box protein 5	GO:0005929,GO:0035091,GO:0061512	cilium|phosphatidylinositol binding|protein localization to cilium
LOC103401167	24.0197891853905	44.2337456740262	3.80583269675476	0.0860391232703027	-3.53886336585093	5.03531310694209e-09	1.17153873972914e-07	Down	0.677032	0.559248	0.483194	0.0343644	0.0774135	0.0519692	DDM1	ATP-dependent DNA helicase DDM1	GO:0000786,GO:0003677,GO:0004003,GO:0005524,GO:0005634,GO:0006344,GO:0006346,GO:0006349,GO:0009294,GO:0016887,GO:0032197,GO:0044030,GO:0051574,GO:0090241	nucleosome|DNA binding|ATP-dependent DNA helicase activity|ATP binding|nucleus|maintenance of chromatin silencing|methylation-dependent chromatin silencing|regulation of gene expression by genetic imprinting|DNA mediated transformation|ATPase activity|transposition, RNA-mediated|regulation of DNA methylation|positive regulation of histone H3-K9 methylation|negative regulation of histone H4 acetyl…
LOC103401207	25.7436118918596	13.6812171053247	37.8060066783945	2.76335112492882	1.46641888969611	0.00324945892669595	0.0181997322807024	Up	0.758223	0.513931	0.85692	1.70393	1.85269	1.67475	BZIP53	bZIP transcription factor 44-like	GO:0003700,GO:0005634,GO:0006971,GO:0009267,GO:0043565,GO:0044212,GO:0045735,GO:0045893,GO:0046982,GO:2000693	DNA-binding transcription factor activity|nucleus|hypotonic response|cellular response to starvation|sequence-specific DNA binding|transcription regulatory region DNA binding|nutrient reservoir activity|positive regulation of transcription, DNA-templated|protein heterodimerization activity|positive regulation of seed maturation
LOC103401220	38.9259708252897	14.8958864489545	62.9560552016249	4.22640541852705	2.07943116463312	1.52508875086851e-06	2.25343133984089e-05	Up	1.09332	0.421649	0.976408	4.00817	2.73314	2.88524	PPD2	psbP domain-containing protein 2, chloroplastic	GO:0005509,GO:0009507,GO:0009543,GO:0009579,GO:0009654,GO:0015979,GO:0019898	calcium ion binding|chloroplast|chloroplast thylakoid lumen|thylakoid|photosystem II oxygen evolving complex|photosynthesis|extrinsic component of membrane
LOC103401242	11.7501724492926	1.89805783548959	21.6022870630957	11.3812585998063	3.5085882022064	3.1105269578949e-05	0.000338745967353017	Up	0.0540392	0.0525381	0.0611188	0.416784	0.543701	0.754242	GATL1	probable galacturonosyltransferase-like 1	GO:0005783,GO:0005789,GO:0005794,GO:0010051,GO:0010417,GO:0016021,GO:0032504,GO:0045489,GO:0047262,GO:0048366,GO:0052386	endoplasmic reticulum|endoplasmic reticulum membrane|Golgi apparatus|xylem and phloem pattern formation|glucuronoxylan biosynthetic process|integral component of membrane|multicellular organism reproduction|pectin biosynthetic process|polygalacturonate 4-alpha-galacturonosyltransferase activity|leaf development|cell wall thickening
LOC103401243	11.8486065608947	0	23.6972131217893	Inf	Inf	1.18955125393506e-05	0.00014220656021269	Up	0	0	0	0.990633	0.375131	0.451386	YPQ1	probable vacuolar amino acid transporter YPQ1	GO:0015174,GO:0034488,GO:0071627	basic amino acid transmembrane transporter activity|basic amino acid transmembrane export from vacuole|integral component of fungal-type vacuolar membrane
LOC103401251	2051.16998504143	1109.09921147173	2993.24075861112	2.69880343223689	1.43231990171608	1.70256442798146e-07	3.05051562219918e-06	Up	92.2734	81.1741	85.0254	199.672	252.829	172.505	RPL30	60S ribosomal protein L30-like	GO:0003723,GO:0003735,GO:0005840,GO:0006412	RNA binding|structural constituent of ribosome|ribosome|translation	path:mdm03010	Ribosome
LOC103401257	634.993015264919	855.383557765294	414.602472764543	0.484697734718797	-1.0448427549405	0.00654562059840579	0.032354226964669	Down	37.2233	24.104	30.0783	20.9332	6.57624	12	PSBO	oxygen-evolving enhancer protein 1, chloroplastic	GO:0009535,GO:0009654,GO:0010207,GO:0010242,GO:0042549	chloroplast thylakoid membrane|photosystem II oxygen evolving complex|photosystem II assembly|oxygen evolving activity|photosystem II stabilization	path:mdm00195	Photosynthesis
LOC103401259	23.72604363227	34.5634194601716	12.8886678043683	0.372899094061578	-1.42314280272206	0.0331445644898212	0.116637645613003	Down	0.163091	0.608654	0.67439	0.170461	0.143096	0.20851	At5g66560	BTB/POZ domain-containing protein At5g66560-like	GO:0005886,GO:0016567	plasma membrane|protein ubiquitination
LOC103401260	310.983177946908	423.92009561107	198.046260282746	0.467178278013141	-1.09795489886134	1.01712581036592e-06	1.5626114065982e-05	Down	8.41861	10.9283	11.5151	4.46504	3.56288	4.4106		protein HGV2-like
LOC103401285	708.149188199992	226.168539056888	1190.1298373431	5.26213699883229	2.39564880931016	1.20789853941556e-08	2.6328555381697e-07	Up	6.91786	5.60948	5.58372	22.1063	24.2939	35.9174	MAN7	mannan endo-1,4-beta-mannosidase 7	GO:0005576,GO:0009828,GO:0009845,GO:0010047,GO:0016985,GO:0046355,GO:0071944,GO:1990059	extracellular region|plant-type cell wall loosening|seed germination|fruit dehiscence|mannan endo-1,4-beta-mannosidase activity|mannan catabolic process|cell periphery|fruit valve development	path:mdm00051	Fructose and mannose metabolism
LOC103401294	722.536512964364	419.139926346357	1025.93309958237	2.44771026355192	1.29143279574489	3.19508293095196e-07	5.42621289796703e-06	Up	2.76165	6.22887	5.30054	10.3031	9.05165	12.2588	FH1	formin-like protein 1	GO:0003779,GO:0005618,GO:0005886,GO:0016020,GO:0016021,GO:0030036,GO:0045010,GO:0051015,GO:0051016	actin binding|cell wall|plasma membrane|membrane|integral component of membrane|actin cytoskeleton organization|actin nucleation|actin filament binding|barbed-end actin filament capping
LOC103401308	1893.06998247444	747.510718019664	3038.62924692923	4.06499756281661	2.02325448732774	1.80926823296285e-11	6.10601700507485e-10	Up	10.0714	14.3849	8.04549	46.5186	28.7797	42.0824	FUC95A	alpha-L-fucosidase 2-like	GO:0004560,GO:0010383,GO:0047513,GO:0048046	alpha-L-fucosidase activity|cell wall polysaccharide metabolic process|1,2-alpha-L-fucosidase activity|apoplast	path:mdm00511	Other glycan degradation
LOC103401334	70.6803975890939	101.495335064111	39.8654601140764	0.392781206041585	-1.34820219425531	6.38375798709593e-05	0.000638375798709593	Down	1.39741	2.0889	2.21578	0.481771	0.688532	0.638514	At5g66900	probable disease resistance protein At5g66900
LOC103401350	12.3011106448418	20.0865971004391	4.51562418924455	0.224807824175745	-2.15323584712606	0.00382988163997118	0.0208896084182059	Down	0.639031	1.13752	0.885597	0.152545	0.13877	0.103325	At3g50520	phosphoglycerate mutase-like protein 4	GO:0016791	phosphatase activity	path:mdm00010,path:mdm00260	Glycolysis / Gluconeogenesis|Glycine, serine and threonine metabolism
LOC103401358	58.6485966987555	93.3372968279229	23.9598965695882	0.256702276408977	-1.96183200524836	0.00811331471784788	0.0385266164898297	Down	6.3211	5.12427	2.39496	0.280125	1.17031	1.54241		uncharacterized LOC103401358
LOC103401375	185.524537066315	248.423398393974	122.625675738656	0.493615643821862	-1.01853997733159	3.96979415220182e-05	0.000421554331400479	Down	9.46946	8.21491	10.4277	5.07395	2.83287	4.32993	RCCR	red chlorophyll catabolite reductase, chloroplastic	GO:0005737,GO:0005739,GO:0005829,GO:0009507,GO:0009535,GO:0009570,GO:0009814,GO:0009941,GO:0010363,GO:0015996,GO:0043067,GO:0051743	cytoplasm|mitochondrion|cytosol|chloroplast|chloroplast thylakoid membrane|chloroplast stroma|defense response, incompatible interaction|chloroplast envelope|regulation of plant-type hypersensitive response|chlorophyll catabolic process|regulation of programmed cell death|red chlorophyll catabolite reductase activity	path:mdm00860	Porphyrin and chlorophyll metabolism
LOC103401379	34.8999060743433	59.6138844395671	10.1859277091196	0.170865022551004	-2.5490709989665	1.14466425326841e-05	0.000137407108497935	Down	1.56301	0.699389	0.64877	0.135755	0.0349736	0.156356		zeaxanthin epoxidase, chloroplastic	GO:0009507,GO:0009540,GO:0009688,GO:0016020,GO:0071949	chloroplast|zeaxanthin epoxidase [overall] activity|abscisic acid biosynthetic process|membrane|FAD binding	path:mdm00906	Carotenoid biosynthesis
LOC103401390	100.035883919026	152.970747863107	47.1010199749446	0.30790867295161	-1.69942559012868	0.00161547100481062	0.0101212278152569	Down	3.11553	2.34718	5.34857	0.691552	1.2317	0.866327	SPT	transcription factor SPATULA	GO:0003677,GO:0003700,GO:0005634,GO:0007623,GO:0009409,GO:0010114,GO:0010154,GO:0010187,GO:0046983,GO:0048440	DNA binding|DNA-binding transcription factor activity|nucleus|circadian rhythm|response to cold|response to red light|fruit development|negative regulation of seed germination|protein dimerization activity|carpel development
LOC103401407	131.573787672211	179.708485905211	83.4390894392107	0.464302445256934	-1.10686321598416	0.0094570760412981	0.0435982070224979	Down	3.96505	2.14403	2.2665	1.34075	0.635036	1.4359	PUB5	U-box domain-containing protein 5	GO:0004842,GO:0005634,GO:0005737	ubiquitin-protein transferase activity|nucleus|cytoplasm
LOC103401441	25.0490121115078	11.0502215958284	39.0478026271873	3.53366693043768	1.82116606353102	0.000343185067485677	0.00271953800924269	Up	1.06216	0.612339	1.89545	5.33801	2.97289	3.66286	RL3	protein RADIALIS-like 4	GO:0003677,GO:0003700,GO:0005634	DNA binding|DNA-binding transcription factor activity|nucleus
LOC103401470	33.27219172289	0	66.54438344578	Inf	Inf	0.00665823711566202	0.0328101808572228	Up	0	0	0	0.414411	2.18958	0.248727	At3g47570	probable LRR receptor-like serine/threonine-protein kinase At3g47570
LOC103401471	132.555177084695	74.9745951963672	190.135758973022	2.53600247490546	1.34255615341584	0.0180145743724	0.072493407975552	Up	2.16709	3.47251	2.54179	4.052	8.44347	6.42835	LUL3	RNA-binding protein MEX3B-like	GO:0004842,GO:0046872	ubiquitin-protein transferase activity|metal ion binding
LOC103401497	61.4461743179769	9.60502658695925	113.287322048995	11.7945870345434	3.56005300107421	1.52730388754209e-18	1.11809443686478e-16	Up	0.189717	0.060601	0	2.41565	1.28938	2.35471	SYP131	uncharacterized LOC103401497	GO:0000149,GO:0005484,GO:0005886,GO:0006886,GO:0006887,GO:0006906,GO:0012505,GO:0016021,GO:0031201,GO:0048278	SNARE binding|SNAP receptor activity|plasma membrane|intracellular protein transport|exocytosis|vesicle fusion|endomembrane system|integral component of membrane|SNARE complex|vesicle docking
LOC103401506	137.685400740484	263.592115961861	11.7786855191072	0.0446852724563714	-4.48405676899622	1.72065744609515e-40	5.03857165275741e-38	Down	6.15962	5.57676	7.73569	0.351196	0.409699	0.175884	AKN	adenylyl-sulfate kinase 1, chloroplastic-like	GO:0000103,GO:0004020,GO:0005524,GO:0009507,GO:0019344,GO:0070814	sulfate assimilation|adenylylsulfate kinase activity|ATP binding|chloroplast|cysteine biosynthetic process|hydrogen sulfide biosynthetic process	path:mdm00230,path:mdm00920	Purine metabolism|Sulfur metabolism
LOC103401541	360.06906262876	200.287401769126	519.850723488393	2.59552382674388	1.37602573163938	7.57154221054313e-05	0.000740799894308625	Up	2.90097	3.61854	3.82129	9.09548	5.0196	8.48962	CYP90B1	cytochrome P450 90B1-like	GO:0004497,GO:0005506,GO:0005783,GO:0007275,GO:0009741,GO:0009753,GO:0009826,GO:0009867,GO:0010012,GO:0010268,GO:0010358,GO:0016021,GO:0016125,GO:0016132,GO:0016705,GO:0020037,GO:0048366,GO:0055114	monooxygenase activity|iron ion binding|endoplasmic reticulum|multicellular organism development|response to brassinosteroid|response to jasmonic acid|unidimensional cell growth|jasmonic acid mediated signaling pathway|steroid 22-alpha hydroxylase activity|brassinosteroid homeostasis|leaf shaping|integral component of membrane|sterol metabolic process|brassinosteroid biosynthetic process|oxidored…	path:mdm00905	Brassinosteroid biosynthesis
LOC103401562	19.9169320800265	39.8338641600529	0	0	-Inf	3.91458878078814e-14	1.83928571726172e-12	Down	1.13646	0.950711	1.2805	0	0	0	PAP12	probable plastid-lipid-associated protein 12, chloroplastic	GO:0009507,GO:0009534,GO:0009535,GO:0009941,GO:0016020	chloroplast|chloroplast thylakoid|chloroplast thylakoid membrane|chloroplast envelope|membrane
LOC103401564	9.4614831923926	15.0082092823145	3.91475710247066	0.260841052308869	-1.93875714977559	0.0188525325497746	0.0751870846908745	Down	0.256064	0.314428	0.154018	0	0	0.107771	DDM1	ATP-dependent DNA helicase DDM1-like	GO:0000786,GO:0003677,GO:0004003,GO:0005524,GO:0005634,GO:0006344,GO:0006346,GO:0006349,GO:0009294,GO:0016887,GO:0032197,GO:0044030,GO:0051574,GO:0090241	nucleosome|DNA binding|ATP-dependent DNA helicase activity|ATP binding|nucleus|maintenance of chromatin silencing|methylation-dependent chromatin silencing|regulation of gene expression by genetic imprinting|DNA mediated transformation|ATPase activity|transposition, RNA-mediated|regulation of DNA methylation|positive regulation of histone H3-K9 methylation|negative regulation of histone H4 acetyl…
LOC103401596	709.617546600969	1031.98796020349	387.247132998448	0.375243847730636	-1.41409967639586	1.22686435590119e-07	2.2411340691604e-06	Down	41	34.8129	26.9994	9.41084	9.36127	13.4137	At5g07610	F-box protein At5g07610-like
LOC103401608	6718.63620656877	3597.71907639731	9839.55333674024	2.73494209186377	1.45151028652225	4.1816411895625e-15	2.22841503833487e-13	Up	119.144	124.658	124.025	294.262	303.658	289.928	GRF8	14-3-3-like protein GF14 kappa	GO:0005634,GO:0005737,GO:0019222,GO:0019904,GO:0050826	nucleus|cytoplasm|regulation of metabolic process|protein domain specific binding|response to freezing
LOC103401609	119.789005903984	184.508831546821	55.0691802611465	0.298463655097032	-1.74437283443149	1.1449109485387e-09	2.98748590442277e-08	Down	4.61085	6.28366	6.47885	2.07257	1.19489	1.42895	At4g40080	putative clathrin assembly protein At4g40080	GO:0005543,GO:0005794,GO:0005905,GO:0006897,GO:0030136	phospholipid binding|Golgi apparatus|clathrin-coated pit|endocytosis|clathrin-coated vesicle
LOC103401612	63.899237804023	124.710462823824	3.08801278422165	0.0247614571728758	-5.33575997238639	9.79577251928558e-29	1.53502402883291e-26	Down	1.56663	1.75106	1.74775	0	0.0204926	0	exgA	probable glucan 1,3-beta-glucosidase A	GO:0000272,GO:0004338,GO:0005576,GO:0046872,GO:0071555	polysaccharide catabolic process|glucan exo-1,3-beta-glucosidase activity|extracellular region|metal ion binding|cell wall organization
LOC103401614	10.0080096186444	17.9542883290306	2.06173090825826	0.114832226734636	-3.12240051536817	0.000495468879532165	0.00372501110415909	Down	0.744058	0.46288	0.490764	0	0.0814791	0		uncharacterized LOC103401614
LOC103401616	62.276688430951	23.8646061146435	100.688770747259	4.21916750955614	2.07695836663017	5.46472470603137e-05	0.000558612021254759	Up	1.51554	1.11016	0.938218	5.55768	5.88251	2.9672		uncharacterized LOC103401616
LOC103401625	8.16516420257121	14.5759207240262	1.75440768111617	0.120363420900355	-3.0545310790669	0.00197483908255727	0.0120198582832952	Down	0.781944	0.81136	1.07999	0.248461	0	0		uncharacterized LOC103401625
LOC103401633	87.2313243231465	45.3397644195694	129.122884226724	2.84789490813922	1.50989590954035	1.53103044185139e-06	2.26105820220437e-05	Up	3.79598	2.4866	2.89969	7.67247	7.76825	9.6827		uncharacterized LOC103401633
LOC103401648	1122.17296933418	734.144341384937	1510.20159728342	2.0570908364348	1.04060550138864	7.13313614561297e-08	1.35867028161183e-06	Up	24.5257	20.8756	24.1535	43.1529	46.703	42.1339	OS9	protein OS-9 homolog	GO:0005783,GO:0005788,GO:0009651,GO:0030246,GO:0030433,GO:0030970,GO:0036503	endoplasmic reticulum|endoplasmic reticulum lumen|response to salt stress|carbohydrate binding|ubiquitin-dependent ERAD pathway|retrograde protein transport, ER to cytosol|ERAD pathway	path:mdm04141	Protein processing in endoplasmic reticulum
LOC103401649	9.42934863800251	0.601298231436806	18.2573990445682	30.3633007550048	4.92425672767081	8.21930765507224e-06	0.000102573279776386	Up	0	0.0544896	0	0.436825	0.290448	0.707518	PLT6	probable polyol transporter 6	GO:0005351,GO:0005355,GO:0005887,GO:0008645	carbohydrate:proton symporter activity|glucose transmembrane transporter activity|integral component of plasma membrane|hexose transmembrane transport
LOC103401654	168.89844930068	18.7343075736269	319.062591027733	17.030925203603	4.0900849063215	3.42019309466158e-15	1.84639474514412e-13	Up	0.943603	0.562002	0.451489	8.2636	13.5039	9.52495	ALKBH2	uncharacterized LOC103401654	GO:0005634,GO:0006281,GO:0006307,GO:0008198,GO:0035511,GO:0035514,GO:0043734,GO:0051747,GO:0103053	nucleus|DNA repair|DNA dealkylation involved in DNA repair|ferrous iron binding|oxidative DNA demethylation|DNA demethylase activity|DNA-N1-methyladenine dioxygenase activity|cytosine C-5 DNA demethylase activity|1-ethyladenine demethylase activity
LOC103401661	224.794983830815	126.292068063441	323.297899598189	2.5599224445021	1.35610010294906	1.51812843498332e-08	3.2408352967722e-07	Up	2.42322	3.27488	3.45721	6.77135	5.72687	8.1758		probable serine/threonine-protein kinase DDB_G0267514
LOC103401682	503.594334625088	260.449988790145	746.738680460032	2.86710966634638	1.51959708841806	3.10193782856843e-05	0.00033793753344682	Up	8.63463	13.7003	7.17841	18.9593	30.8206	23.2043	ERF060	ethylene-responsive transcription factor ERF060	GO:0003700,GO:0005634,GO:0009873,GO:0043565	DNA-binding transcription factor activity|nucleus|ethylene-activated signaling pathway|sequence-specific DNA binding
LOC103401698	4394.07391331352	2286.38624651235	6501.7615801147	2.84368469677093	1.50776151009708	6.08087543489757e-16	3.50466359558013e-14	Up	72.6414	67.8389	69.1273	176.598	189.544	171.179	At2g21870	probable ATP synthase 24 kDa subunit, mitochondrial	GO:0005507,GO:0005730,GO:0005739,GO:0005753,GO:0006811,GO:0008270,GO:0009507,GO:0009555,GO:0016020,GO:0045263,GO:0050897	copper ion binding|nucleolus|mitochondrion|mitochondrial proton-transporting ATP synthase complex|ion transport|zinc ion binding|chloroplast|pollen development|membrane|proton-transporting ATP synthase complex, coupling factor F(o)|cobalt ion binding
LOC103401725	43.3684551187167	20.7168702456907	66.0200399917426	3.18677672876169	1.67209794487921	4.0330168520848e-05	0.000427641399202408	Up	0.571941	0.388043	0.319891	1.15058	1.24132	1.33725	CYCA1-1	cyclin-A1-1	GO:0000079,GO:0000278,GO:0000307,GO:0005634,GO:0005737,GO:0006468,GO:0007088,GO:0008284,GO:0016538,GO:0019901,GO:0045787,GO:0051301	regulation of cyclin-dependent protein serine/threonine kinase activity|mitotic cell cycle|cyclin-dependent protein kinase holoenzyme complex|nucleus|cytoplasm|protein phosphorylation|regulation of mitotic nuclear division|positive regulation of cell proliferation|cyclin-dependent protein serine/threonine kinase regulator activity|protein kinase binding|positive regulation of cell cycle|cell divi…
LOC103401733	3.13166385400304	0.34531611015676	5.91801159784931	17.1379539609744	4.0991229764176	0.0257688881189574	0.0959835624525988	Up	0	0	0.0231521	0.0851496	0.116052	0.151566	At1g11050	probable receptor-like protein kinase At1g11050
LOC103401753	43.7125238222632	21.2891935633127	66.1358540812137	3.10654576391209	1.63531130742064	5.83069022332733e-05	0.000589997737104363	Up	0.671183	1.28751	0.800605	1.76136	2.32022	2.98879		delta(7)-sterol-C5(6)-desaturase-like	GO:0005506,GO:0005789,GO:0016021,GO:0016126,GO:0016491	iron ion binding|endoplasmic reticulum membrane|integral component of membrane|sterol biosynthetic process|oxidoreductase activity	path:mdm00100	Steroid biosynthesis
LOC103401762	78.4672164104189	46.9358571160935	109.998575704744	2.3435936289108	1.22872243307894	0.00011226074679987	0.00103809858045557	Up	0.640084	1.43809	1.33933	2.40562	2.21299	2.71898		threonine synthase, chloroplastic-like	GO:0004795,GO:0009088,GO:0009507,GO:0030170	threonine synthase activity|threonine biosynthetic process|chloroplast|pyridoxal phosphate binding	path:mdm00260,path:mdm00750	Glycine, serine and threonine metabolism|Vitamin B6 metabolism
LOC103401768	17.2961038862428	26.2203028936499	8.3719048788356	0.319290929353189	-1.64705652651757	0.00668589353238481	0.0329073095931809	Down	0.477821	0.570835	0.351471	0.0958206	0.103995	0.193344		uncharacterized LOC103401768
LOC103401786	79.0990333374865	33.6228972587216	124.575169416251	3.70506944888389	1.88950058507398	6.60813186154079e-09	1.49430376494592e-07	Up	0.50488	0.515247	0.776356	2.18148	1.91847	1.84354	HDA14	histone deacetylase 14	GO:0005634,GO:0005829,GO:0009507,GO:0032041,GO:0042903,GO:0043014,GO:0043621,GO:0048487,GO:0051721,GO:0090042	nucleus|cytosol|chloroplast|NAD-dependent histone deacetylase activity (H3-K14 specific)|tubulin deacetylase activity|alpha-tubulin binding|protein self-association|beta-tubulin binding|protein phosphatase 2A binding|tubulin deacetylation
LOC103401823	156.685839540918	4.26341291910092	309.108266162735	72.5025401076846	6.17995963534687	0.0128207356883727	0.0554074429943237	Up	0.133586	0.295003	0.0380927	1.51743	22.3604	6.23516	LIGB	extradiol ring-cleavage dioxygenase-like	GO:0006725,GO:0008198,GO:0008270,GO:0016701,GO:0051213	cellular aromatic compound metabolic process|ferrous iron binding|zinc ion binding|oxidoreductase activity, acting on single donors with incorporation of molecular oxygen|dioxygenase activity	path:mdm00965	Betalain biosynthesis
LOC103401840	5397.74059098664	7453.28378219464	3342.19739977864	0.448419448050927	-1.15707924538322	0.00318848315143098	0.0179135904186016	Down	84.4389	155.797	107.073	29.3909	21.1308	14.586	GT5	anthocyanidin 3-O-glucosyltransferase 5-like	GO:0009718,GO:0047213	anthocyanin-containing compound biosynthetic process|anthocyanidin 3-O-glucosyltransferase activity	path:mdm00940	Phenylpropanoid biosynthesis
LOC103401851	17.5418773234811	4.39982847856722	30.683926168395	6.97389144096522	2.80196390658664	5.53468975372007e-05	0.000564768236396849	Up	0.189507	0.186468	0.174523	1.72737	0.812614	0.94542	GRP-2	glycine-rich protein 2-like	GO:0003677,GO:0003723,GO:0006355,GO:0008270	DNA binding|RNA binding|regulation of transcription, DNA-templated|zinc ion binding
LOC103401862	481.753898573533	288.113868443137	675.393928703929	2.3441909698881	1.22909010392736	5.52189882416013e-09	1.26645448506647e-07	Up	2.08919	1.83271	1.84533	3.5871	4.00041	4.50553		early endosome antigen 1-like
LOC103401883	114.10399411864	174.436825924176	53.771162313105	0.308255794200694	-1.69780008205635	3.59490337866182e-09	8.57506952677476e-08	Down	2.11185	2.39363	1.97104	0.680316	0.432087	0.662125		nitrate reductase [NADH]	GO:0006809,GO:0009703,GO:0020037,GO:0030151,GO:0042128,GO:0043546,GO:0050464	nitric oxide biosynthetic process|nitrate reductase (NADH) activity|heme binding|molybdenum ion binding|nitrate assimilation|molybdopterin cofactor binding|nitrate reductase (NADPH) activity	path:mdm00910	Nitrogen metabolism
LOC103401888	293.597561772527	176.832148403694	410.362975141361	2.32063557925301	1.21451998701557	8.77626476158916e-08	1.63616665876829e-06	Up	1.58131	2.1528	2.05129	3.62507	3.36952	4.8411	PIP5K1	phosphatidylinositol 4-phosphate 5-kinase 1-like	GO:0003785,GO:0005524,GO:0005886,GO:0016307,GO:0016308,GO:0051015	actin monomer binding|ATP binding|plasma membrane|phosphatidylinositol phosphate kinase activity|1-phosphatidylinositol-4-phosphate 5-kinase activity|actin filament binding	path:mdm00562,path:mdm04070,path:mdm04144	Inositol phosphate metabolism|Phosphatidylinositol signaling system|Endocytosis
LOC103401908	118.127644939309	201.111881195256	35.1434086833624	0.174745561895681	-2.51667227970095	6.63457295636542e-17	4.2646623060983e-15	Down	3.69474	3.44597	4.34413	0.563743	0.34191	0.421264		uncharacterized LOC103401908
LOC103401929	81.7917005014348	160.511445058735	3.071955944135	0.0191385476780856	-5.70737483419952	1.21590302514973e-16	7.59677342652818e-15	Down	2.64526	1.33134	2.36086	0.0856308	0.0772232	0.0214909	SCPL18	serine carboxypeptidase-like 1	GO:0004185,GO:0005576,GO:0019748	serine-type carboxypeptidase activity|extracellular region|secondary metabolic process
LOC103401937	39.8242230854564	13.4276495601959	66.2207966107168	4.93167447615088	2.30207757525943	1.37649754853929e-05	0.000162544455935454	Up	0.463865	0.208427	0.518937	1.11609	2.26217	1.52457	PAIR1	protein PAIR1	GO:0005634,GO:0009553,GO:0009554,GO:0009556,GO:0042138,GO:0070192	nucleus|embryo sac development|megasporogenesis|microsporogenesis|meiotic DNA double-strand break formation|chromosome organization involved in meiotic cell cycle
LOC103401951	114.42343889068	192.978816767735	35.8680610136245	0.185865275859757	-2.42767082987065	9.00050965282357e-16	5.1363144652629e-14	Down	6.38871	6.67838	7.86618	1.64522	0.894675	0.928323	PUP3	purine permease 3-like	GO:0005345,GO:0006863,GO:0016020,GO:0016021	purine nucleobase transmembrane transporter activity|purine nucleobase transport|membrane|integral component of membrane
LOC103401954	202.231094589266	270.919964537057	133.542224641474	0.492921313014599	-1.02057073303888	3.01473359562256e-05	0.000329427542167727	Down	7.57043	6.48416	8.5776	2.99331	3.15863	3.62835	PUR7	phosphoribosylaminoimidazole-succinocarboxamide synthase, chloroplastic	GO:0004639,GO:0005524,GO:0006189,GO:0009507,GO:0009570,GO:0009733	phosphoribosylaminoimidazolesuccinocarboxamide synthase activity|ATP binding|'de novo' IMP biosynthetic process|chloroplast|chloroplast stroma|response to auxin	path:mdm00230	Purine metabolism
LOC103401970	21.3152923375923	12.5016094869345	30.1289751882502	2.41000770498697	1.26903775887379	0.0205102066739685	0.0803284100889416	Up	0.273481	0.395652	0.255499	0.847561	0.687683	0.454713	LYK4	lysM domain receptor-like kinase 4
LOC103402009	16.6106031903497	5.30419040187366	27.9170159788257	5.26320019902835	2.39594027240093	0.000246669516508041	0.00205074542115518	Up	0.112325	0.180394	0.125849	0.777802	0.490676	0.90279		uncharacterized LOC103402009
LOC103402019	275.055985824362	380.146838397398	169.965133251327	0.447103897977571	-1.16131797113072	3.13929821579008e-07	5.33772758215568e-06	Down	2.7251	2.63446	2.53992	1.21793	0.688083	1.2683	SUVR5	histone-lysine N-methyltransferase SUVR5-like	GO:0003700,GO:0005634,GO:0005694,GO:0006338,GO:0006342,GO:0008270,GO:0018024,GO:0034968,GO:0043565,GO:1900109	DNA-binding transcription factor activity|nucleus|chromosome|chromatin remodeling|chromatin silencing|zinc ion binding|histone-lysine N-methyltransferase activity|histone lysine methylation|sequence-specific DNA binding|regulation of histone H3-K9 dimethylation
LOC103402020	5236.06610877041	2527.18272178787	7944.94949575295	3.14379701446054	1.652508070114	1.07529840152758e-18	8.03425274749598e-17	Up	41.2763	66.6461	48.5701	139.798	153.408	146.236	OPT2	oligopeptide transporter 2-like	GO:0005886,GO:0005887,GO:0015031,GO:0016020,GO:0035673	plasma membrane|integral component of plasma membrane|protein transport|membrane|oligopeptide transmembrane transporter activity
LOC103402025	5.85514660967199	9.67378630750385	2.03650691184012	0.210518079178617	-2.24798395840654	0.0494547327354109	0.158559245963234	Down	0.21302	0.0682658	0.219331	0.0369837	0.0663668	0	LECRK3	G-type lectin S-receptor-like serine/threonine-protein kinase LECRK3	GO:0004674,GO:0005524,GO:0005886,GO:0006468,GO:0006952,GO:0016021,GO:0030246	protein serine/threonine kinase activity|ATP binding|plasma membrane|protein phosphorylation|defense response|integral component of membrane|carbohydrate binding
LOC103402035	40.0281895465191	21.2190701128338	58.8373089802044	2.77285049096559	1.47136982995206	0.00570600680667428	0.0290001993908639	Up	0.34438	0.452879	0.724809	1.30407	1.71398	0.812659	WAKL14	wall-associated receptor kinase-like 14
LOC103402092	817.497168552506	498.967642459879	1136.02669464513	2.27675423809968	1.18697856964299	3.13099606584986e-09	7.54510190764651e-08	Up	7.71743	13.247	9.77201	22.3337	18.2941	23.0324		uncharacterized LOC103402092
LOC103402133	236.768588123052	141.511751578815	332.025424667289	2.34627457411102	1.23037185545037	2.19527326543634e-07	3.85469242671106e-06	Up	2.55352	3.16971	2.49756	4.3452	4.08532	4.8204	At1g62020	coatomer subunit alpha-1-like	GO:0000139,GO:0005198,GO:0005829,GO:0005886,GO:0006886,GO:0006888,GO:0006890,GO:0006891,GO:0016020,GO:0030126	Golgi membrane|structural molecule activity|cytosol|plasma membrane|intracellular protein transport|ER to Golgi vesicle-mediated transport|retrograde vesicle-mediated transport, Golgi to ER|intra-Golgi vesicle-mediated transport|membrane|COPI vesicle coat
LOC103402143	7.2930452423997	0.303063691869633	14.2830267929298	47.1287956165788	5.55853690842415	4.14044391655696e-05	0.000437591939996304	Up	0.0156161	0	0	0.210398	0.188917	0.211338	RPM1	disease resistance protein RPM1-like			path:mdm04626	Plant-pathogen interaction
LOC103402147	23.3577166230579	12.8288189403164	33.8866143057995	2.64144458374933	1.40132714315219	0.00839612005095268	0.0395842446376839	Up	0.352873	0.144595	0.209818	0.715591	0.438884	0.67238	GT-2	trihelix transcription factor GT-2-like	GO:0003700,GO:0005634,GO:0043565	DNA-binding transcription factor activity|nucleus|sequence-specific DNA binding
LOC103402149	146.456628493694	198.108175862065	94.8050811253221	0.478552087579319	-1.06325213276206	4.9465929157595e-05	0.00051141843305231	Down	3.39723	2.87655	2.76985	1.26187	1.15744	1.62745	Os05g0571100	protein WHAT'S THIS FACTOR 1 homolog, chloroplastic	GO:0003723,GO:0006397,GO:0008380,GO:0009507	RNA binding|mRNA processing|RNA splicing|chloroplast
LOC103402155	156.612360020958	59.869760490035	253.35495955188	4.23176838320657	2.08126066678472	1.49799274303271e-10	4.42678997151051e-09	Up	0.932699	0.536206	0.663389	3.36745	1.94677	2.8535	N	TMV resistance protein N	GO:0005524,GO:0005737,GO:0007165,GO:0009626,GO:0043531	ATP binding|cytoplasm|signal transduction|plant-type hypersensitive response|ADP binding
LOC103402159	50.2127277373519	13.5279525482059	86.8975029264979	6.42355172498166	2.68337121621893	4.97546145801532e-05	0.000514219706480799	Up	0.242393	0.38091	0.0840412	2.08328	1.27904	1.03645	VIP1	transcription factor VIP1-like	GO:0003676,GO:0003682,GO:0003700,GO:0005634,GO:0005829,GO:0006952,GO:0006970,GO:0007231,GO:0008272,GO:0009294,GO:0009652,GO:0009970,GO:0043565,GO:0043621,GO:0045596,GO:0051019,GO:0051170	nucleic acid binding|chromatin binding|DNA-binding transcription factor activity|nucleus|cytosol|defense response|response to osmotic stress|osmosensory signaling pathway|sulfate transport|DNA mediated transformation|thigmotropism|cellular response to sulfate starvation|sequence-specific DNA binding|protein self-association|negative regulation of cell differentiation|mitogen-activated protein kin…	path:mdm04016	MAPK signaling pathway - plant
LOC103402167	15.884086114934	26.5679805445518	5.2001916853162	0.195731537690492	-2.35305186266363	0.000437455104134438	0.00336031358475288	Down	1.72293	1.75175	2.13187	0.270913	0.322486	0.180806	BSK1	serine/threonine-protein kinase BSK1-like
LOC103402171	349.968671169702	483.782829842995	216.15451249641	0.446800711316191	-1.16229661226326	1.16582503604717e-07	2.1363633245896e-06	Down	7.06324	7.32775	7.5704	3.37801	2.3738	3.11253	MFL1	protein MITOFERRINLIKE 1, chloroplastic-like	GO:0000095,GO:0005743,GO:0006826,GO:0009507,GO:0009536,GO:0009706,GO:0009941,GO:0010039,GO:0016021	S-adenosyl-L-methionine transmembrane transporter activity|mitochondrial inner membrane|iron ion transport|chloroplast|plastid|chloroplast inner membrane|chloroplast envelope|response to iron ion|integral component of membrane
LOC103402172	23.2079823899658	5.43582984444356	40.980134935488	7.53889214861599	2.91435253289345	0.0306991172313217	0.109682944113386	Up	0.370857	0.310772	0	0.240186	2.55026	2.16964	SABP2	salicylic acid-binding protein 2-like	GO:0009862,GO:0016298,GO:0080031	systemic acquired resistance, salicylic acid mediated signaling pathway|lipase activity|methyl salicylate esterase activity
LOC103402174	21.3939984441358	3.7091962582537	39.0788006300179	10.5356519065444	3.39720768035162	1.11293147938432e-06	1.69453170101636e-05	Up	0.0746846	0.0717297	0.0334273	0.752706	0.572065	0.32693	RCH2	LRR receptor-like serine/threonine-protein kinase RCH1
LOC103402175	84.2786626497043	50.6329858223098	117.924339477099	2.3290022810612	1.21971205254752	0.000111253393393798	0.00102976879772868	Up	2.97104	1.84293	2.71111	6.1425	4.1056	4.42601		uncharacterized LOC103402175
LOC103402186	3.08194266537087	6.16388533074174	0	0	-Inf	0.00795247223146517	0.0378994196926147	Down	0.521005	0.720933	0.083368	0	0	0		uncharacterized LOC103402186
LOC103402196	24.2863779351064	9.74621826332196	38.8265376068909	3.98375416575753	1.99412862261049	0.000123388800607337	0.00113018683399896	Up	0.303249	0.532658	1.10226	2.64689	2.39767	1.89441		uncharacterized LOC103402196
LOC103402202	226.959540235672	65.1015136073718	388.817566863972	5.97248121155733	2.57833041020765	3.75235853323277e-07	6.2625718985848e-06	Up	0.780824	1.14357	0.902763	5.83715	3.01929	6.11272	CEPR2	receptor protein-tyrosine kinase CEPR2-like	GO:0001653,GO:0004672,GO:0004674,GO:0004714,GO:0005524,GO:0005886,GO:0006970,GO:0009506,GO:0010555,GO:0016021,GO:0017046,GO:0042277,GO:0046777,GO:0048831,GO:0090548,GO:1902025,GO:2000280	peptide receptor activity|protein kinase activity|protein serine/threonine kinase activity|transmembrane receptor protein tyrosine kinase activity|ATP binding|plasma membrane|response to osmotic stress|plasmodesma|response to mannitol|integral component of membrane|peptide hormone binding|peptide binding|protein autophosphorylation|regulation of shoot system development|response to nitrate starva…
LOC103402211	96.8528755224954	141.046768164752	52.6589828802391	0.37334412950696	-1.42142204872146	2.62041586772616e-06	3.65620372325641e-05	Down	4.09666	3.55778	4.32547	1.0184	1.57608	1.30466		elongation factor 1-gamma-like	GO:0003746	translation elongation factor activity
LOC103402216	49.1275475046801	2.84467217708316	95.4104228322771	33.5400414855915	5.06781256825653	1.66640533385963e-16	1.0170334869177e-14	Up	0	0.0309079	0.0359304	2.85302	1.74515	2.56971		stress response protein NST1-like
LOC103402223	436.057258186547	255.898907362237	616.215609010858	2.40804314235924	1.26786123956862	4.86762067470746e-08	9.60601248194481e-07	Up	4.09245	2.5412	2.71185	7.98415	5.82711	5.964	N	TMV resistance protein N-like	GO:0005524,GO:0005737,GO:0007165,GO:0009626,GO:0043531	ATP binding|cytoplasm|signal transduction|plant-type hypersensitive response|ADP binding
LOC103402254	2.58388742120368	5.16777484240736	0	0	-Inf	0.0205320308191044	0.080403022213405	Down	0	0.108307	0	0	0	0	BAK1	BRASSINOSTEROID INSENSITIVE 1-associated receptor kinase 1-like			path:mdm04016,path:mdm04075,path:mdm04626	MAPK signaling pathway - plant|Plant hormone signal transduction|Plant-pathogen interaction
LOC103402334	1551.10335166604	708.525331394005	2393.68137193808	3.37839914238292	1.7563397860193	2.81669498579112e-08	5.7463749217512e-07	Up	63.6079	59.3455	64.9087	176.666	234.882	157.603		uncharacterized LOC103402334
LOC103402341	51.966512680162	80.2208941347362	23.7121312255878	0.295585476593688	-1.7583527095745	3.25473521306483e-06	4.45069687862025e-05	Down	3.77331	3.44485	2.10938	0.328226	0.48979	0.481471	ARPC5A	actin-related protein 2/3 complex subunit 5A-like	GO:0003779,GO:0005737,GO:0005885,GO:0007015,GO:0009825,GO:0010090,GO:0030036,GO:0030041,GO:0034314,GO:0042995,GO:0051015	actin binding|cytoplasm|Arp2/3 protein complex|actin filament organization|multidimensional cell growth|trichome morphogenesis|actin cytoskeleton organization|actin filament polymerization|Arp2/3 complex-mediated actin nucleation|cell projection|actin filament binding	path:mdm04144	Endocytosis
LOC103402356	57.7077783090067	77.0717945358491	38.3437620821644	0.497507062253874	-1.00721108962037	0.00463694708143769	0.0244054277216555	Down	0.964644	0.674578	1.02705	0.442573	0.404207	0.480266	GDCSH	uncharacterized LOC103402356	GO:0005739,GO:0005960,GO:0019464	mitochondrion|glycine cleavage complex|glycine decarboxylation via glycine cleavage system
LOC103402375	250.801986197424	115.908444325945	385.695528068904	3.32758782426839	1.73447674336164	0.0224818816368364	0.086393126809635	Up	6.12219	5.76084	5.29652	9.71097	27.0697	13.3305	HOS3	elongation of fatty acids protein 3-like	GO:0009922,GO:0019367,GO:0030148,GO:0030176,GO:0030497,GO:0034625,GO:0034626,GO:0042761,GO:0071215	fatty acid elongase activity|fatty acid elongation, saturated fatty acid|sphingolipid biosynthetic process|integral component of endoplasmic reticulum membrane|fatty acid elongation|fatty acid elongation, monounsaturated fatty acid|fatty acid elongation, polyunsaturated fatty acid|very long-chain fatty acid biosynthetic process|cellular response to abscisic acid stimulus
LOC103402408	3.28735300495017	6.21579605363379	0.358909956266557	0.057741591450179	-4.11424531868091	0.024403705364018	0.0921896557861458	Down	0.0818166	0.0474047	0.0368066	0	0	0.00858905	TWN2	valine--tRNA ligase, mitochondrial 1-like	GO:0002161,GO:0004832,GO:0005524,GO:0005739,GO:0005829,GO:0006438,GO:0009507,GO:0009793	aminoacyl-tRNA editing activity|valine-tRNA ligase activity|ATP binding|mitochondrion|cytosol|valyl-tRNA aminoacylation|chloroplast|embryo development ending in seed dormancy	path:mdm00970	Aminoacyl-tRNA biosynthesis
LOC103402417	3.99208907117747	7.29158222623997	0.69259591611497	0.0949856827538128	-3.39614611819111	0.0262470606845681	0.0973020830237378	Down	0.0824304	0.0926659	0.123155	0	0.0128858	0.0143939	BAM1	leucine-rich repeat receptor-like serine/threonine-protein kinase BAM3
LOC103402437	97.0045611404213	57.4935371493838	136.515585131459	2.37445097136317	1.2475939671453	2.55191289363249e-05	0.000283448102629908	Up	2.16339	2.59983	3.29929	5.2628	6.05009	5.41684	RABD1	ras-related protein RABD1-like	GO:0000139,GO:0003924,GO:0005525,GO:0005886,GO:0006886,GO:0006888,GO:0030742,GO:0032482,GO:0032588,GO:0080115	Golgi membrane|GTPase activity|GTP binding|plasma membrane|intracellular protein transport|ER to Golgi vesicle-mediated transport|GTP-dependent protein binding|Rab protein signal transduction|trans-Golgi network membrane|myosin XI tail binding
LOC103402458	86.0096215917638	33.9453836306132	138.073859552914	4.06752980185484	2.0241529162311	0.000228311063026347	0.00192035937145229	Up	1.15037	0.511411	0.570444	2.23424	2.34049	4.02208	NPF4.3	protein NRT1/ PTR FAMILY 4.3-like	GO:0005886,GO:0009624,GO:0015333,GO:0016021,GO:0035673,GO:1904680	plasma membrane|response to nematode|peptide:proton symporter activity|integral component of membrane|oligopeptide transmembrane transporter activity|peptide transmembrane transporter activity
LOC103402463	20.9296213791668	30.3569055224834	11.5023372358502	0.378903483009201	-1.40009769323814	0.0108942636081547	0.0487611092203764	Down	0.48063	0.5595	0.409256	0.120615	0.140176	0.208483	At1g19290	putative pentatricopeptide repeat-containing protein At1g19290
LOC103402507	574.188044224368	242.862387166227	905.513701282509	3.72850531466912	1.89859739796543	2.76540038806476e-19	2.13399234377359e-17	Up	6.42484	5.85896	5.1872	19.5609	18.5238	21.5243		uncharacterized LOC103402507
LOC103402544	50.7671231998451	17.6536392133122	83.880607186378	4.75146264024279	2.2483716858666	2.07801973534479e-07	3.66657286230343e-06	Up	0.327872	0.187546	0.251373	1.60765	0.907964	0.989974	TCP8	transcription factor TCP8-like	GO:0000978,GO:0003700,GO:0005634,GO:0006355,GO:0043565,GO:0044212	RNA polymerase II proximal promoter sequence-specific DNA binding|DNA-binding transcription factor activity|nucleus|regulation of transcription, DNA-templated|sequence-specific DNA binding|transcription regulatory region DNA binding
LOC103402561	73.7595622370059	116.319113098403	31.200011375609	0.268227727537904	-1.89846971404403	5.05065737787951e-05	0.000521247979297711	Down	2.88401	1.78469	1.52948	0.3491	0.42505	0.559458	EIX1	receptor-like protein EIX2	GO:0005886,GO:0016021,GO:0050832	plasma membrane|integral component of membrane|defense response to fungus
LOC103402574	5.39396676609082	0	10.7879335321816	Inf	Inf	0.000130148885067331	0.00118387705619765	Up	0	0	0	1.71815	1.34476	1.06805	MLP43	MLP-like protein 43	GO:0006952,GO:0009507	defense response|chloroplast
LOC103402575	6.0326250691071	1.25209260961443	10.8131575285998	8.63606848692253	3.11037468446182	0.00724961908204933	0.0351566505835748	Up	0.0591016	0.0573922	0.066841	0.731922	0.277183	0.373148	MLP28	MLP-like protein 28	GO:0006952	defense response
LOC103402588	46.5305442643249	65.5373736588403	27.5237148698095	0.419969756693124	-1.25164265613845	0.00128879035492253	0.00838089555612474	Down	1.12619	0.819723	0.905298	0.387119	0.279577	0.406277	SULTR3	probable sulfate transporter 3.3	GO:0008271,GO:0015116,GO:0015293,GO:0015301,GO:0016021	secondary active sulfate transmembrane transporter activity|sulfate transmembrane transporter activity|symporter activity|anion:anion antiporter activity|integral component of membrane
LOC103402594	14.5153281443334	22.0932524986092	6.93740379005755	0.314005544927994	-1.67113805943452	0.0139942115009311	0.0594943820812425	Down	0.449875	0.373921	0.741173	0.188993	0.151614	0.121147	SCPL50	serine carboxypeptidase-like 50	GO:0004185,GO:0005576,GO:0005773	serine-type carboxypeptidase activity|extracellular region|vacuole
LOC103402596	225.988710427691	309.470452668341	142.506968187041	0.460486508350976	-1.11876920701869	2.79720291014221e-06	3.88366438529802e-05	Down	4.15129	4.03846	4.25449	1.51165	1.55079	1.79957	RECG	ATP-dependent DNA helicase homolog RECG, chloroplastic	GO:0003677,GO:0004003,GO:0005524,GO:0005739,GO:0006281,GO:0006310,GO:0009507,GO:0033955	DNA binding|ATP-dependent DNA helicase activity|ATP binding|mitochondrion|DNA repair|DNA recombination|chloroplast|mitochondrial DNA inheritance	path:mdm03440	Homologous recombination
LOC103402598	310.52565437987	428.933342908518	192.117965851223	0.447897019496097	-1.15876102898959	1.03982269401496e-05	0.000125864133192041	Down	5.61206	8.57749	8.02896	3.15444	2.92836	2.87619	PIN3	auxin efflux carrier component 3	GO:0005783,GO:0005886,GO:0009416,GO:0009606,GO:0009630,GO:0009734,GO:0009926,GO:0009958,GO:0009986,GO:0010252,GO:0010315,GO:0010329,GO:0012506,GO:0016021,GO:0016328,GO:0048364,GO:0048766,GO:0048767	endoplasmic reticulum|plasma membrane|response to light stimulus|tropism|gravitropism|auxin-activated signaling pathway|auxin polar transport|positive gravitropism|cell surface|auxin homeostasis|auxin efflux|auxin efflux transmembrane transporter activity|vesicle membrane|integral component of membrane|lateral plasma membrane|root development|root hair initiation|root hair elongation
LOC103402602	268.145177008155	385.768239876986	150.522114139323	0.390187938196576	-1.35775891400077	0.0207610236563951	0.0811244205147451	Down	20.6954	11.0707	8.46841	4.36364	3.34766	6.22631	GFA2	chaperone protein DnaJ-like	GO:0000740,GO:0005524,GO:0005739,GO:0009408,GO:0009553,GO:0009558,GO:0010197,GO:0010198,GO:0031072,GO:0046872,GO:0051082,GO:0051085	nuclear membrane fusion|ATP binding|mitochondrion|response to heat|embryo sac development|embryo sac cellularization|polar nucleus fusion|synergid death|heat shock protein binding|metal ion binding|unfolded protein binding|chaperone cofactor-dependent protein refolding
LOC103402615	5.17095347887639	0	10.3419069577528	Inf	Inf	0.000181517347213898	0.0015826129009717	Up	0	0	0	0.215913	0.305182	0.17019	PILS2	protein PIN-LIKES 2-like	GO:0005789,GO:0009733,GO:0009734,GO:0010252,GO:0010311,GO:0010329,GO:0016021,GO:0040009	endoplasmic reticulum membrane|response to auxin|auxin-activated signaling pathway|auxin homeostasis|lateral root formation|auxin efflux transmembrane transporter activity|integral component of membrane|regulation of growth rate
LOC103402625	2.67925785045847	5.35851570091694	0	0	-Inf	0.016413721551033	0.067379465840335	Down	0.251502	0.0489262	0.142383	0	0	0		protein gar2
LOC103402628	106.090808485611	145.777419967849	66.4041970033729	0.45551771336067	-1.13442093881674	0.000102691654587963	0.000964689263287443	Down	5.05651	7.427	6.99341	2.34473	2.8377	2.05734	ASF1B	probable histone chaperone ASF1A	GO:0000724,GO:0005634,GO:0005737,GO:0006333,GO:0008361,GO:0009294,GO:0010091,GO:0031567,GO:0051301	double-strand break repair via homologous recombination|nucleus|cytoplasm|chromatin assembly or disassembly|regulation of cell size|DNA mediated transformation|trichome branching|mitotic cell size control checkpoint|cell division
LOC103402630	2020.42786298338	2824.75109729794	1216.10462866882	0.430517446238753	-1.21585639247514	1.49867489254137e-06	2.21666250687623e-05	Down	71.2251	97.7591	87.5438	28.3007	41.7493	27.0822	DTX12	protein DETOXIFICATION 12-like	GO:0006855,GO:0009507,GO:0015238,GO:0015297,GO:0016021	drug transmembrane transport|chloroplast|drug transmembrane transporter activity|antiporter activity|integral component of membrane
LOC103402637	4.7221933055351	8.75981911499855	0.684567496071647	0.0781485881254708	-3.67763638082082	0.00957062065632252	0.044033057106299	Down	0.17812	0.171782	0.240807	0.0370021	0.0334965	0	ORC4	origin of replication complex subunit 4	GO:0003688,GO:0005524,GO:0005664,GO:0006270	DNA replication origin binding|ATP binding|nuclear origin of replication recognition complex|DNA replication initiation
LOC103402642	3663.27298990482	6458.03167376124	868.514306048404	0.134485916130939	-2.89447299862546	3.83255068480896e-07	6.38538185934551e-06	Down	232.072	456.089	310.674	22.7168	50.562	43.5467	MES10	methylesterase 10	GO:0009694,GO:0009696,GO:0016788,GO:0080030,GO:0080031,GO:0080032	jasmonic acid metabolic process|salicylic acid metabolic process|hydrolase activity, acting on ester bonds|methyl indole-3-acetate esterase activity|methyl salicylate esterase activity|methyl jasmonate esterase activity
LOC103402654	6.72025940233088	1.51048930704571	11.9300294976161	7.89812244414324	2.98150973399083	0.00659457491858868	0.032562889948882	Up	0.110696	0.0707725	0	0.380503	0.205962	0.461082	LPP2	lipid phosphate phosphatase 2-like	GO:0003993,GO:0005886,GO:0005887,GO:0008195	acid phosphatase activity|plasma membrane|integral component of plasma membrane|phosphatidate phosphatase activity	path:mdm00561,path:mdm00564	Glycerolipid metabolism|Glycerophospholipid metabolism
LOC103402655	35.1767669065345	51.043490159831	19.3100436532379	0.378305707403098	-1.40237555275851	0.00138848775775042	0.00893212957378043	Down	1.00016	0.762254	1.29753	0.400708	0.21578	0.454709	LPP1	lipid phosphate phosphatase 1	GO:0005886,GO:0005887,GO:0008195,GO:0009626,GO:0010224	plasma membrane|integral component of plasma membrane|phosphatidate phosphatase activity|plant-type hypersensitive response|response to UV-B	path:mdm00561,path:mdm00564	Glycerolipid metabolism|Glycerophospholipid metabolism
LOC103402658	338.911444022336	543.592713905341	134.23017413933	0.246931518222491	-2.01781710173918	8.4111316085466e-19	6.31706490496803e-17	Down	24.1097	19.6871	19.1327	5.69876	4.81041	3.90172		uncharacterized LOC103402658
LOC103402662	1680.2380096958	2364.18846419949	996.287555192107	0.421407840482568	-1.24671093849177	7.92698262776801e-11	2.45506530611772e-09	Down	59.6977	52.1368	62.024	19.9435	21.6138	18.9547		uncharacterized LOC103402662
LOC103402664	130.198675069821	189.683956188494	70.7133939511479	0.372795861980432	-1.42354224866513	2.5681162736594e-07	4.42625985573044e-06	Down	3.19849	4.16062	3.79937	1.28037	1.21974	1.01702		uncharacterized LOC103402664
LOC103402675	7.34240007389972	12.2721877033179	2.4126124444815	0.196591879362244	-2.34672436550686	0.0333617562751886	0.1171885755989	Down	0.951399	0.203833	0.520526	0.128984	0.121105	0.0451764	GIS3	zinc finger protein GIS3	GO:0003700,GO:0005634,GO:0006355,GO:0007275,GO:0009736,GO:0009740,GO:0010026,GO:0010090,GO:0019760,GO:0043565,GO:0044212,GO:0046872	DNA-binding transcription factor activity|nucleus|regulation of transcription, DNA-templated|multicellular organism development|cytokinin-activated signaling pathway|gibberellic acid mediated signaling pathway|trichome differentiation|trichome morphogenesis|glucosinolate metabolic process|sequence-specific DNA binding|transcription regulatory region DNA binding|metal ion binding
LOC103402680	132.676516838832	223.390312766291	41.9627209113725	0.187844855006195	-2.41238649319407	5.46625239083684e-17	3.56104846764854e-15	Down	4.18235	4.12034	3.93344	0.544131	0.554222	0.619425	At5g66900	probable disease resistance protein At5g66900
LOC103402686	15.9189407169925	22.8238286318708	9.01405280211428	0.394940434731762	-1.34029301374225	0.0328205023653453	0.115834716772749	Down	0.737158	0.634669	0.610331	0.121111	0.291003	0.162794	ENDO2	endonuclease 2	GO:0000014,GO:0003676,GO:0004519,GO:0004521,GO:0006308,GO:0008309,GO:0043765,GO:0046872,GO:0090502	single-stranded DNA endodeoxyribonuclease activity|nucleic acid binding|endonuclease activity|endoribonuclease activity|DNA catabolic process|double-stranded DNA exodeoxyribonuclease activity|T/G mismatch-specific endonuclease activity|metal ion binding|RNA phosphodiester bond hydrolysis, endonucleolytic
LOC103402693	145.735726781126	252.369626083421	39.1018274788314	0.154938722562065	-2.69023034477693	6.18584901334637e-21	5.53480749681825e-19	Down	7.25132	7.79305	6.28205	0.693819	1.59314	0.554614	CSE	caffeoylshikimate esterase-like	GO:0003846,GO:0004622,GO:0005783,GO:0005794,GO:0005886,GO:0006979,GO:0009506,GO:0009809,GO:0010043,GO:0016020,GO:0016787,GO:0042542,GO:0046686,GO:0090430	2-acylglycerol O-acyltransferase activity|lysophospholipase activity|endoplasmic reticulum|Golgi apparatus|plasma membrane|response to oxidative stress|plasmodesma|lignin biosynthetic process|response to zinc ion|membrane|hydrolase activity|response to hydrogen peroxide|response to cadmium ion|caffeoyl-CoA: alcohol caffeoyl transferase activity	path:mdm00561	Glycerolipid metabolism
LOC103402704	306.746359609404	477.459932671021	136.032786547787	0.284909323776736	-1.81142525965467	2.13494993651861e-06	3.04887678126476e-05	Down	14.2706	8.11922	9.92957	2.56947	2.58844	3.01574	COL16	zinc finger protein CONSTANS-LIKE 6	GO:0003700,GO:0005634,GO:0006355,GO:0008270,GO:0016020	DNA-binding transcription factor activity|nucleus|regulation of transcription, DNA-templated|zinc ion binding|membrane
LOC103402708	6.78913097253772	1.90047241164082	11.6777895334346	6.14467721915115	2.61933722759376	0.0109633478262176	0.0490171890009328	Up	0.14577	0	0.167903	0.458374	1.06169	0.396636		uncharacterized LOC103402708
LOC103402715	56.7926980427603	19.072432990736	94.5129630947846	4.95547490667248	2.30902332434816	0.0188844706100122	0.0753040994476279	Up	0.643815	0.551455	0.174509	1.28752	3.77825	1.37599	IST1	uncharacterized LOC103402715	GO:0005737,GO:0005768,GO:0015031,GO:0032511	cytoplasm|endosome|protein transport|late endosome to vacuole transport via multivesicular body sorting pathway	path:mdm04144	Endocytosis
LOC103402717	6.02236827870915	1.64207571420955	10.4026608432088	6.33506771532537	2.66336004036719	0.0149272452446879	0.0625800201942879	Up	0.111132	0	0.125163	0.460411	0.313894	0.349199		uncharacterized LOC103402717
LOC103402722	244.151674907865	151.704756514771	336.59859330096	2.21877415734283	1.14976282721802	7.2236348527799e-06	9.12078285636277e-05	Up	4.49869	2.44878	2.96938	6.03252	7.36263	5.96443	HHO3	transcription factor HHO3-like	GO:0003677,GO:0003700,GO:0005634,GO:0006355	DNA binding|DNA-binding transcription factor activity|nucleus|regulation of transcription, DNA-templated
LOC103402725	115.454463736686	171.645168351608	59.2637591217648	0.345269020333655	-1.53420720238753	7.90057160125639e-08	1.49502330757456e-06	Down	4.67022	3.82418	4.23599	1.63512	1.1149	1.62038	MAP1B	methionine aminopeptidase 1B, chloroplastic	GO:0005739,GO:0009507,GO:0031365,GO:0046872,GO:0070006,GO:0070084	mitochondrion|chloroplast|N-terminal protein amino acid modification|metal ion binding|metalloaminopeptidase activity|protein initiator methionine removal
LOC103402749	15.0134493716106	4.48916246744394	25.5377362757773	5.68875296026391	2.50811243193079	0.00182390788476264	0.0112452338535238	Up	0.160918	0.0791117	0.276291	0.421588	1.08859	0.827536	CML16	probable calcium-binding protein CML16	GO:0005509	calcium ion binding	path:mdm04626	Plant-pathogen interaction
LOC103402759	34.6376911257716	48.3278837429484	20.9474985085949	0.433445391898655	-1.20607784953614	0.0327670593206791	0.115699684137543	Down	0.603016	0.482594	1.20138	0.374645	0.161595	0.271592	WIT2	WPP domain-interacting tail-anchored protein 2	GO:0016021,GO:2000769	integral component of membrane|regulation of establishment or maintenance of cell polarity regulating cell shape
LOC103402760	37.7907072352124	67.661287113485	7.92012735693979	0.117055523103717	-3.09473508725199	8.25227138651571e-11	2.5450356116499e-09	Down	4.30622	3.20772	3.36787	0.229309	0.468423	0.292502	MEL1	uncharacterized LOC103402760	GO:0005730,GO:0005731,GO:0007140,GO:0007143,GO:0009561,GO:0031047,GO:0033169,GO:0035197,GO:0055046	nucleolus|nucleolus organizer region|male meiotic nuclear division|female meiotic nuclear division|megagametogenesis|gene silencing by RNA|histone H3-K9 demethylation|siRNA binding|microgametogenesis
LOC103402798	45.6818767615898	66.5610900023363	24.8026635208433	0.372630068407425	-1.42418400141288	0.00278825055449471	0.015996711572294	Down	1.52184	1.56398	2.60349	0.901248	0.736262	0.255319		uncharacterized LOC103402798
LOC103402803	693.559207366322	1003.23793142239	383.880483310259	0.382641516321053	-1.38593468136779	7.48829183785475e-12	2.66036250464962e-10	Down	31.2152	35.0205	31.8305	10.0796	10.0835	13.1537	At1g69160	protein BIG GRAIN 1-like E	GO:0005886,GO:0009734,GO:0010929,GO:0060918	plasma membrane|auxin-activated signaling pathway|positive regulation of auxin mediated signaling pathway|auxin transport
LOC103402807	121.417236541796	162.116251284459	80.7182217991333	0.497903332698585	-1.00606242282216	0.000326099127384002	0.00260573696330271	Down	8.32343	6.21135	6.85151	3.15194	4.04425	2.025	CB5-A	cytochrome b5	GO:0009707,GO:0010319,GO:0016021,GO:0020037,GO:0031966,GO:0046872	chloroplast outer membrane|stromule|integral component of membrane|heme binding|mitochondrial membrane|metal ion binding
LOC103402819	14.497004832992	22.0909970286762	6.90301263730791	0.312480809641464	-1.67816050250531	0.0310089968386145	0.110476934785724	Down	0.604494	0.453532	0.151209	0.104031	0.142857	0.0886286	MAPKKK5	mitogen-activated protein kinase kinase kinase 5-like	GO:0000187,GO:0004674,GO:0004709,GO:0005524,GO:0005737,GO:0005829,GO:0005886,GO:0006952,GO:0010200,GO:0023014,GO:0031098,GO:0032147,GO:0045088,GO:0046777,GO:0071323,GO:1900150,GO:2000071	activation of MAPK activity|protein serine/threonine kinase activity|MAP kinase kinase kinase activity|ATP binding|cytoplasm|cytosol|plasma membrane|defense response|response to chitin|signal transduction by protein phosphorylation|stress-activated protein kinase signaling cascade|activation of protein kinase activity|regulation of innate immune response|protein autophosphorylation|cellular respo…
LOC103402825	1273.86404269569	1709.48486952347	838.243215867904	0.490348426483335	-1.02812084662834	1.08426228541899e-07	1.99193686022157e-06	Down	66.2619	74.7503	67.2577	31.1095	35.1459	24.8494	PDCB2	PLASMODESMATA CALLOSE-BINDING PROTEIN 4	GO:0001872,GO:0009408,GO:0009506,GO:0030247,GO:0031225,GO:0046658	(1->3)-beta-D-glucan binding|response to heat|plasmodesma|polysaccharide binding|anchored component of membrane|anchored component of plasma membrane
LOC103402829	11.1215813530055	17.4351333934228	4.80802931258818	0.27576670645961	-1.85847980527621	0.0159425725351094	0.0659026347915044	Down	1.75629	1.15757	0.896143	0.41548	0.453852	0.169176		uncharacterized LOC103402829
LOC103402830	8.73482340163759	14.4068580154717	3.0627887878035	0.212592418451986	-2.23383794701531	0.0145683433290822	0.0614128650734467	Down	0.246359	0.308016	0.674123	0.0736046	0.066907	0.0374235	GRF12	14-3-3-like protein GF14 iota	GO:0005634,GO:0005737,GO:0019904	nucleus|cytoplasm|protein domain specific binding
LOC103402838	121.178103873421	25.7083386510898	216.647869095752	8.42714389428535	3.07504375955114	1.73060142660064e-23	1.90038391504366e-21	Up	0.490026	0.472753	0.403216	2.77434	3.64823	3.80232	ZAT9	uncharacterized LOC103402838	GO:0003700,GO:0005634,GO:0006355,GO:0044212,GO:0046872	DNA-binding transcription factor activity|nucleus|regulation of transcription, DNA-templated|transcription regulatory region DNA binding|metal ion binding
LOC103402851	2184.25203472531	1271.19092338464	3097.31314606598	2.43654441601828	1.28483652180594	0.0123516707642165	0.0537811558207627	Up	38.6244	77.6878	52.5846	75.8508	163.609	107.484	At5g01610	uncharacterized protein At5g01610
LOC103402859	30.7694682761645	44.7974615332602	16.7414750190688	0.373714814323551	-1.41999034056794	0.00470130685364566	0.0246859057575055	Down	2.77481	2.08863	3.56562	1.73293	0.570467	0.781871		protein UXT homolog
LOC103402870	308.169148829899	442.647753503148	173.69054415665	0.392389982287384	-1.3496398848511	1.4881953599712e-09	3.81456971578824e-08	Down	9.42775	8.61147	7.70188	4.18041	1.67238	3.13296		uncharacterized LOC103402870
LOC103402902	206.245857582452	279.979222815339	132.512492349566	0.473294021667333	-1.07919139585221	1.01713117277364e-05	0.000123581863783352	Down	7.09731	7.46988	8.91661	3.65259	3.46407	3.28975		uncharacterized LOC103402902
LOC103402905	11.0858183635699	21.1201308547582	1.05150587238153	0.0497869013981337	-4.32808996100772	5.92868792705228e-06	7.6455810945394e-05	Down	0.176534	0.287064	0.235765	0	0.0103489	0.0230936	PRAF1	PH, RCC1 and FYVE domains-containing protein 1-like	GO:0017112,GO:0035091,GO:0046872,GO:0070300	Rab guanyl-nucleotide exchange factor activity|phosphatidylinositol binding|metal ion binding|phosphatidic acid binding
LOC103402920	485.638236186813	684.269989021644	287.006483351982	0.419434562317044	-1.2534823473562	1.27076394373802e-06	1.90653932467663e-05	Down	19.7102	24.641	28.5633	10.9709	6.32743	11.1881	UTR3	UDP-galactose/UDP-glucose transporter 3	GO:0005459,GO:0005460,GO:0008643,GO:0009553,GO:0009555,GO:0015297,GO:0030173,GO:0030176,GO:0030968,GO:0072334	UDP-galactose transmembrane transporter activity|UDP-glucose transmembrane transporter activity|carbohydrate transport|embryo sac development|pollen development|antiporter activity|integral component of Golgi membrane|integral component of endoplasmic reticulum membrane|endoplasmic reticulum unfolded protein response|UDP-galactose transmembrane transport
LOC103402923	2988.49419357788	1398.35826277664	4578.63012437911	3.27428974838507	1.7111819944028	1.78683371463131e-05	0.000206540308561251	Up	46.1335	56.6641	55.0728	136.022	192.787	114.619	UBC2	ubiquitin-conjugating enzyme E2 2	GO:0005524,GO:0016567,GO:0016740	ATP binding|protein ubiquitination|transferase activity	path:mdm04120	Ubiquitin mediated proteolysis
LOC103402949	95.6618434015281	133.425508873572	57.8981779294838	0.433936347091959	-1.20444466159482	6.68118836789049e-05	0.000664223768124641	Down	3.3645	3.01183	3.82463	0.749774	1.53454	1.53072	Os01g0234100	B3 domain-containing protein Os01g0234100-like	GO:0003677,GO:0005634	DNA binding|nucleus
LOC103402952	32.0140010853492	62.3171527986633	1.71084937203503	0.0274539078760948	-5.18684466815128	2.547849103296e-16	1.51979723260393e-14	Down	1.04553	0.695733	0.978679	0.0141627	0.0383954	0.0142819	PRL2	protein pleiotropic regulatory locus 1-like	GO:0000398,GO:0000974,GO:0071013,GO:0080008	mRNA splicing, via spliceosome|Prp19 complex|catalytic step 2 spliceosome|Cul4-RING E3 ubiquitin ligase complex	path:mdm03040	Spliceosome
LOC103402953	419.154063440676	597.792388286295	240.515738595058	0.402339914839916	-1.31351322472123	7.74224812804362e-10	2.06673824338844e-08	Down	12.3305	10.49	10.4846	3.73737	3.06735	3.98674		uncharacterized LOC103402953
LOC103402959	139.749269671705	91.2554183212223	188.243121022188	2.06281582491427	1.04461501834308	0.0156107895722599	0.064743460615138	Up	1.20727	1.94039	1.38564	3.20937	1.74834	3.62846	RCOM_0699480	glycosyltransferase family 92 protein RCOM_0530710-like	GO:0016021,GO:0016757	integral component of membrane|transferase activity, transferring glycosyl groups
LOC103402963	611.863114696233	172.584729791497	1051.14149960097	6.09058229468434	2.60658016466596	4.68402084143918e-22	4.54858416399103e-20	Up	0.986059	5.19377	2.62356	18.2231	14.4109	14.8581	TOR1L3	TORTIFOLIA1-like protein 4	GO:0005874,GO:0008017	microtubule|microtubule binding
LOC103402973	422.047541136829	657.37087680203	186.724205471628	0.284046969619345	-1.81579858334752	1.15064782492338e-16	7.20459620832157e-15	Down	16.6449	18.5951	17.4072	3.26553	5.34829	4.85646	GATL9	probable galacturonosyltransferase-like 9	GO:0000139,GO:0005794,GO:0016021,GO:0045489,GO:0047262,GO:0071555	Golgi membrane|Golgi apparatus|integral component of membrane|pectin biosynthetic process|polygalacturonate 4-alpha-galacturonosyltransferase activity|cell wall organization
LOC103402984	821.153629188692	147.563154969979	1494.7441034074	10.1295211783152	3.34049407455486	2.41997178065623e-07	4.20845722382869e-06	Up	2.36976	3.02494	3.05856	18.2063	35.3973	21.8478	AXY4	protein ALTERED XYLOGLUCAN 4	GO:0000139,GO:0005794,GO:0010411,GO:0016021,GO:0016413	Golgi membrane|Golgi apparatus|xyloglucan metabolic process|integral component of membrane|O-acetyltransferase activity
LOC103402992	9.77808552457213	2.93159158980864	16.6245794593356	5.67083747856596	2.50356181046789	0.00461399374777246	0.0243199415905316	Up	0.0292887	0.0850904	0.164664	0.18406	0.607049	0.615427	ATL46	RING-H2 finger protein ATL47-like	GO:0016021,GO:0016567,GO:0016740,GO:0031625,GO:0046872	integral component of membrane|protein ubiquitination|transferase activity|ubiquitin protein ligase binding|metal ion binding
LOC103402994	773.198988672583	423.303534910977	1123.09444243419	2.65316575414467	1.40771480945751	9.29115595686344e-12	3.25302670518685e-10	Up	8.25133	8.13271	7.78577	16.1232	19.9479	21.0767		uncharacterized LOC103402994
LOC103403002	296.498770926776	181.040185177535	411.957356676017	2.27550229399089	1.18618504072387	0.0138775760759086	0.0591025312825901	Up	3.0261	4.86354	3.5807	10.2237	4.39621	8.63519	CCD4	probable carotenoid cleavage dioxygenase 4, chloroplastic	GO:0009507,GO:0009570,GO:0010287,GO:0010436,GO:0016121,GO:0045549,GO:0046872	chloroplast|chloroplast stroma|plastoglobule|carotenoid dioxygenase activity|carotene catabolic process|9-cis-epoxycarotenoid dioxygenase activity|metal ion binding	path:mdm00906	Carotenoid biosynthesis
LOC103403007	160.968887660014	83.255314688237	238.682460631792	2.86687356267377	1.51947827900261	3.06043740092244e-05	0.000333667093842578	Up	5.877	3.32084	1.86449	7.02217	9.67107	10.4344	XTH33	probable xyloglucan endotransglucosylase/hydrolase protein 33	GO:0004553,GO:0005618,GO:0005887,GO:0009831,GO:0010411,GO:0016762,GO:0042546,GO:0048046	hydrolase activity, hydrolyzing O-glycosyl compounds|cell wall|integral component of plasma membrane|plant-type cell wall modification involved in multidimensional cell growth|xyloglucan metabolic process|xyloglucan:xyloglucosyl transferase activity|cell wall biogenesis|apoplast
LOC103403008	23.3698142091391	34.5103041135634	12.2293243047148	0.354367329377095	-1.49668249302127	0.0050863414730575	0.0263685692603607	Down	1.43938	1.29993	1.91214	0.518943	0.375553	0.736789	WER	transcription factor WER-like	GO:0003677,GO:0003700,GO:0005634,GO:0030154,GO:0043565,GO:0044212,GO:0045165,GO:0045893,GO:0048765	DNA binding|DNA-binding transcription factor activity|nucleus|cell differentiation|sequence-specific DNA binding|transcription regulatory region DNA binding|cell fate commitment|positive regulation of transcription, DNA-templated|root hair cell differentiation
LOC103403010	421.63789854173	243.24124749419	600.03454958927	2.46682894357217	1.30265767882563	0.00103585321938741	0.0069917077601958	Up	9.14516	6.03985	8.10065	23.4676	13.9224	13.3541	EO	2-methylene-furan-3-one reductase-like	GO:0008270,GO:0009507,GO:0102978	zinc ion binding|chloroplast|furaneol oxidoreductase activity
LOC103403011	2115.60166296841	350.470662676686	3880.73266326013	11.0729172981881	3.46896346309114	0.0461855991080425	0.150687165292692	Up	2.33275	9.16748	6.63462	22.7972	125.936	30.8959	GP1	polygalacturonase 1 beta-like protein 3	GO:0005618,GO:0009835,GO:0048046,GO:0071555	cell wall|fruit ripening|apoplast|cell wall organization
LOC103403033	6313.09656483485	3802.4636072555	8823.72952241419	2.32052964440674	1.21445412783149	0.00176543220793913	0.0109475678520118	Up	98.0529	98.1586	82.4801	138.417	247.65	183.471	ACLA-1	ATP-citrate synthase alpha chain protein 1	GO:0003878,GO:0005524,GO:0005829,GO:0006085,GO:0006633,GO:0009346	ATP citrate synthase activity|ATP binding|cytosol|acetyl-CoA biosynthetic process|fatty acid biosynthetic process|citrate lyase complex	path:mdm00020	Citrate cycle (TCA cycle)
LOC103403036	18.576021466797	31.6089981320978	5.54304480149611	0.175362875417027	-2.51158473547791	5.72096704731744e-05	0.000580541499380708	Down	0.529126	0.669192	0.473661	0.0756536	0.0518226	0.0774112	CRK10	cysteine-rich receptor-like protein kinase 10
LOC103403044	41.251147558531	80.0552915198309	2.44700359723114	0.0305664191682443	-5.03190863823037	1.19303293579884e-17	8.13788819030784e-16	Down	0.979262	1.66734	1.67604	0.0608658	0.0184866	0.0206594	CRK3	cysteine-rich receptor-like protein kinase 3
LOC103403054	418.719036276515	155.918439830631	681.519632722399	4.37100084802484	2.12796365802317	8.14977134429434e-17	5.15855614129024e-15	Up	1.22537	5.34295	3.97157	12.5917	14.8368	14.7549	TAA1	L-tryptophan--pyruvate aminotransferase 1-like	GO:0004021,GO:0004838,GO:0005737,GO:0009641,GO:0009684,GO:0009723,GO:0009908,GO:0009926,GO:0009958,GO:0010078,GO:0010087,GO:0016846,GO:0030170,GO:0042742,GO:0047312,GO:0048364,GO:0048366,GO:0048367,GO:0048467,GO:0050048,GO:0050362,GO:0080097,GO:0080098,GO:0080099,GO:0080100,GO:0080130	L-alanine:2-oxoglutarate aminotransferase activity|L-tyrosine:2-oxoglutarate aminotransferase activity|cytoplasm|shade avoidance|indoleacetic acid biosynthetic process|response to ethylene|flower development|auxin polar transport|positive gravitropism|maintenance of root meristem identity|phloem or xylem histogenesis|carbon-sulfur lyase activity|pyridoxal phosphate binding|defense response to bac…	path:mdm00380	Tryptophan metabolism
LOC103403059	156.779177521314	82.2998223825063	231.258532660122	2.80995178319216	1.49054537502045	1.13593803907185e-08	2.48347237953943e-07	Up	1.26613	1.3274	1.70978	4.16469	2.7787	3.85625	At1g67900	BTB/POZ domain-containing protein At1g67900-like	GO:0016567	protein ubiquitination
LOC103403071	2.06230027640235	0	4.12460055280471	Inf	Inf	0.0388245342107006	0.131886951812539	Up	0	0	0	0.169059	0.0655301	0	DTX29	protein DETOXIFICATION 29-like	GO:0005773,GO:0005774,GO:0006855,GO:0015238,GO:0015297,GO:0016021	vacuole|vacuolar membrane|drug transmembrane transport|drug transmembrane transporter activity|antiporter activity|integral component of membrane
LOC103403097	101.28049976856	145.933475677681	56.627523859439	0.388036559785026	-1.36573550913541	6.44368795609057e-05	0.000643259345203394	Down	1.94261	1.37048	1.07708	0.602478	0.36284	0.622206		uncharacterized LOC103403097
LOC103403099	295.27590832421	408.86271372317	181.689102925251	0.444376796482028	-1.17014460776043	2.70134262425904e-07	4.63384157853666e-06	Down	13.5935	14.8387	13.6711	4.65497	6.40341	5.13725	KCR1	very-long-chain 3-oxoacyl-CoA reductase 1-like	GO:0005783,GO:0005789,GO:0009793,GO:0016020,GO:0016021,GO:0018454,GO:0042761,GO:0045703,GO:0102339,GO:0102340,GO:0102341,GO:0102342	endoplasmic reticulum|endoplasmic reticulum membrane|embryo development ending in seed dormancy|membrane|integral component of membrane|acetoacetyl-CoA reductase activity|very long-chain fatty acid biosynthetic process|ketoreductase activity|3-oxo-arachidoyl-CoA reductase activity|3-oxo-behenoyl-CoA reductase activity|3-oxo-lignoceroyl-CoA reductase activity|3-oxo-cerotoyl-CoA reductase activity	path:mdm00062,path:mdm01040	Fatty acid elongation|Biosynthesis of unsaturated fatty acids
LOC103403106	18.972266451945	33.094084018509	4.85044888538114	0.146565436972613	-2.77038316731737	1.1988170782483e-05	0.000143078250713949	Down	1.17319	1.02221	1.14999	0.199301	0.15187	0.101621	ATL60	RING-H2 finger protein ATL3-like	GO:0005886,GO:0016021,GO:0016567,GO:0016740,GO:0046872	plasma membrane|integral component of membrane|protein ubiquitination|transferase activity|metal ion binding
LOC103403122	1126.13026783398	1531.81505506937	720.4454805986	0.470321451806057	-1.08828095850603	2.30399966069734e-08	4.77433525115195e-07	Down	33.7336	41.2974	41.9029	18.3224	15.3462	16.0409	CLKR27	3-oxoacyl-[acyl-carrier-protein] reductase 4-like	GO:0004316,GO:0006633,GO:0009507,GO:0051287,GO:0102131,GO:0102132	3-oxoacyl-[acyl-carrier-protein] reductase (NADPH) activity|fatty acid biosynthetic process|chloroplast|NAD binding|3-oxo-glutaryl-[acp] methyl ester reductase activity|3-oxo-pimeloyl-[acp] methyl ester reductase activity	path:mdm00061,path:mdm00780	Fatty acid biosynthesis|Biotin metabolism
LOC103403150	489.230510205507	319.458006489818	659.003013921197	2.06287837691807	1.04465876538844	5.16103849530685e-07	8.41025890831622e-06	Up	6.72731	6.91791	8.33128	13.3888	12.2851	15.7007	GCS1	mannosyl-oligosaccharide glucosidase GCS1-like	GO:0004558,GO:0004573,GO:0005783,GO:0005789,GO:0006487,GO:0009311,GO:0009913,GO:0010053,GO:0016021	alpha-1,4-glucosidase activity|mannosyl-oligosaccharide glucosidase activity|endoplasmic reticulum|endoplasmic reticulum membrane|protein N-linked glycosylation|oligosaccharide metabolic process|epidermal cell differentiation|root epidermal cell differentiation|integral component of membrane	path:mdm00510,path:mdm04141	N-Glycan biosynthesis|Protein processing in endoplasmic reticulum
LOC103403152	778.514288216304	511.029263656292	1045.99931277632	2.0468481693053	1.03340409038563	0.00244205248109716	0.0143193669671169	Up	12.9267	13.7252	14.3294	30.1101	27.7664	16.0394	At1g67480	F-box/kelch-repeat protein At1g67480
LOC103403170	155.677097060449	221.094768249442	90.2594258714569	0.408238632628454	-1.29251538026727	0.000338896572527118	0.00269241206839165	Down	7.9852	6.21495	7.82473	4.80997	1.33617	2.15285		photosystem I chlorophyll a/b-binding protein 2, chloroplastic	GO:0009522,GO:0009523,GO:0009535,GO:0009765,GO:0016021,GO:0016168,GO:0018298,GO:0046872	photosystem I|photosystem II|chloroplast thylakoid membrane|photosynthesis, light harvesting|integral component of membrane|chlorophyll binding|protein-chromophore linkage|metal ion binding	path:mdm00196	Photosynthesis - antenna proteins
LOC103403187	1045.75140145565	663.497497973005	1428.00530493829	2.15223917091001	1.10583840852323	1.41355060899566e-08	3.03771921088096e-07	Up	26.3527	28.0787	24.8535	46.3183	51.8683	46.0673		uncharacterized LOC103403187
LOC103403196	65.1344833622157	129.910056768165	0.358909956266557	0.00276275728912244	-8.49967545908781	9.52354420151706e-08	1.76526564195639e-06	Down	13.5475	8.60038	2.79771	0	0	0	SAUR32	auxin-responsive protein SAUR32-like	GO:0005634,GO:0005737,GO:0007275,GO:0009734,GO:0040008,GO:1900140	nucleus|cytoplasm|multicellular organism development|auxin-activated signaling pathway|regulation of growth|regulation of seedling development	path:mdm04075	Plant hormone signal transduction
LOC103403197	141.289259282017	213.322595284451	69.2559232795825	0.324653481677525	-1.62302741356181	7.01469539978773e-05	0.00069499664948683	Down	2.11276	4.06314	3.68243	1.02049	0.825642	0.942132	SPAC1F8.04c	5-methylthioadenosine/S-adenosylhomocysteine deaminase-like	GO:0004000,GO:0005634,GO:0005829,GO:0046872,GO:0050270	adenosine deaminase activity|nucleus|cytosol|metal ion binding|S-adenosylhomocysteine deaminase activity
LOC103403226	3799.50036991445	2387.76648063442	5211.23425919447	2.18247232359584	1.12596335884248	5.65477485211075e-08	1.09961082235391e-06	Up	99.7584	80.8373	124.879	198.101	229.167	176.736	At5g67140	F-box protein At5g67140	GO:0016567,GO:0019005,GO:0031146	protein ubiquitination|SCF ubiquitin ligase complex|SCF-dependent proteasomal ubiquitin-dependent protein catabolic process
LOC103403258	9.08269703353862	14.6749130175079	3.49048104956935	0.23785361081221	-2.07185416813092	0.0176516240358897	0.0713298830220858	Down	0.129287	0.076583	0.200637	0.0516321	0.00929622	0.0207569		uncharacterized LOC103403258
LOC103403268	2543.95687388664	1276.87788378392	3811.03586398936	2.98465179199101	1.57756262754679	9.44984001702827e-11	2.87763510602573e-09	Up	30.7636	30.2571	62.199	111.758	96.147	126.364		26S proteasome non-ATPase regulatory subunit 10
LOC103403298	374.371622392892	549.33012698347	199.413117802313	0.363011435213553	-1.46191309965246	2.46003680291821e-11	8.19729504788493e-10	Down	6.68012	6.46914	5.96383	2.25388	1.82256	2.28382	At1g05670	pentatricopeptide repeat-containing protein At1g05670, mitochondrial-like
LOC103403299	24.152380217539	39.2035910148014	9.10116942027657	0.232151422476589	-2.10686197403606	8.91674342822396e-05	0.000853686895588549	Down	0.739888	0.819904	0.660517	0.159131	0.0818268	0.137083	GALT6	hydroxyproline O-galactosyltransferase GALT6-like	GO:0000139,GO:0005783,GO:0005794,GO:0006486,GO:0009507,GO:0010405,GO:0016021,GO:0018258,GO:0030246,GO:0048354,GO:1900056,GO:1990714	Golgi membrane|endoplasmic reticulum|Golgi apparatus|protein glycosylation|chloroplast|arabinogalactan protein metabolic process|integral component of membrane|protein O-linked glycosylation via hydroxyproline|carbohydrate binding|mucilage biosynthetic process involved in seed coat development|negative regulation of leaf senescence|hydroxyproline O-galactosyltransferase activity
LOC103403305	1057.15507419301	680.988549066938	1433.32159931908	2.10476608055005	1.07365990398866	5.48174661804021e-08	1.06942015112373e-06	Up	8.50858	15.6144	14.1867	24.4195	21.7244	26.6995	At5g67200	probable inactive receptor kinase At5g67200
LOC103403306	141.365056371267	259.286301380159	23.4438113623741	0.0904166985975916	-3.46726694855928	1.47182315220896e-07	2.65845191168459e-06	Down	5.28536	4.31616	2.31752	0.415495	0.203775	0.364515	FH4	formin-like protein 4	GO:0005886,GO:0016021	plasma membrane|integral component of membrane
LOC103403308	16.0642441742314	25.250699707573	6.87778864088976	0.27238012096857	-1.87630667944702	0.00384935926525817	0.0209761137405704	Down	0.54552	0.363755	0.683984	0.0906076	0.247124	0.123089	At3g28050	WAT1-related protein At3g28050-like	GO:0005886,GO:0016021,GO:0022857	plasma membrane|integral component of membrane|transmembrane transporter activity
LOC103403320	115.855408111697	171.676557841574	60.0342583818194	0.349693977655471	-1.51583514438047	1.67174875489519e-06	2.45015148657288e-05	Down	6.07	4.18139	4.14677	1.0218	0.640665	3.11916		uncharacterized LOC103403320
LOC103403390	13.9794881611952	3.65970011151288	24.2992762108775	6.63969054033566	2.73111600266753	0.000188931216542435	0.00163593666892628	Up	0.130426	0.250417	0.0488165	0.851021	1.06326	0.961957	At5g08350	GEM-like protein 6
LOC103403398	1176.93470480465	1831.56136472024	522.308044889054	0.285170922989431	-1.81010120776729	3.45596534493476e-20	2.84626236788803e-18	Down	46.3304	46.9426	43.0588	15.3392	8.4843	11.13	At5g23160	uncharacterized LOC103403398	GO:0016021	integral component of membrane
LOC103403404	433.255685733359	686.18156768001	180.329803786708	0.262801876763326	-1.92795251638284	4.90563722508919e-13	1.98901291126343e-11	Down	20.1191	16.9596	15.255	7.11223	3.13682	2.54959	HCF136	photosystem II stability/assembly factor HCF136, chloroplastic	GO:0009507,GO:0009523,GO:0009533,GO:0009534,GO:0009535,GO:0009570,GO:0009579,GO:0009657,GO:0009735,GO:0009941,GO:0015979,GO:0031977,GO:0046686	chloroplast|photosystem II|chloroplast stromal thylakoid|chloroplast thylakoid|chloroplast thylakoid membrane|chloroplast stroma|thylakoid|plastid organization|response to cytokinin|chloroplast envelope|photosynthesis|thylakoid lumen|response to cadmium ion
LOC103403419	186.927394224971	282.861371293812	90.9934171561288	0.32168909010065	-1.63626108623456	8.75172819247137e-11	2.68478942116132e-09	Down	6.34724	7.49969	7.60009	2.40128	1.3181	2.13013	UNG	uracil-DNA glycosylase, mitochondrial	GO:0004844,GO:0005634,GO:0005739,GO:0097510	uracil DNA N-glycosylase activity|nucleus|mitochondrion|base-excision repair, AP site formation via deaminated base removal	path:mdm03410	Base excision repair
LOC103403420	36.5343881199473	51.7944814552065	21.2742947846881	0.410744430429076	-1.28368708209017	0.00307735561008439	0.0173869692333554	Down	1.05012	1.26273	1.36414	0.585129	0.319198	0.414717	At5g66900	probable disease resistance protein At5g66900
LOC103403426	287.81104112068	67.3445163051758	508.277565936183	7.5474232175474	2.91598417479593	5.47812494971111e-05	0.00055978442824154	Up	0.722091	1.7333	3.38026	12.2735	19.0129	7.94232	GA2OX8	gibberellin 2-beta-dioxygenase 8-like	GO:0009651,GO:0009685,GO:0009686,GO:0009735,GO:0046872,GO:0051213,GO:0052635	response to salt stress|gibberellin metabolic process|gibberellin biosynthetic process|response to cytokinin|metal ion binding|dioxygenase activity|C-20 gibberellin 2-beta-dioxygenase activity	path:mdm00904	Diterpenoid biosynthesis
LOC103403429	26.3215912821838	15.5744457885119	37.0687367758558	2.38009989435378	1.25102212566113	0.0429572247756804	0.142576644586779	Up	0.525636	0.511463	0.516147	1.07115	1.20136	0.524776		uncharacterized LOC103403429
LOC103403433	12.1479473462634	17.9421624128684	6.35373227965848	0.354122994400134	-1.49767756906316	0.0398238495110474	0.134477972897526	Down	0.267671	0.37239	0.594119	0.124572	0.0451949	0.151018	PSKR1	phytosulfokine receptor 1-like
LOC103403435	110.722153997765	66.1279097040493	155.316398291482	2.34872686867904	1.23187895340419	0.0301222197407122	0.108142330962642	Up	0.943404	1.26867	0.80875	1.70192	1.47541	3.13039	PSKR1	phytosulfokine receptor 1
LOC103403438	346.09661266549	184.06353066109	508.129694669889	2.76062125313401	1.46499296916223	0.00137979111363488	0.00888102672830268	Up	4.63254	5.37751	4.21286	8.47448	15.3174	10.4472	MIOX1	inositol oxygenase 1	GO:0005506,GO:0005737,GO:0019310,GO:0019853,GO:0050113	iron ion binding|cytoplasm|inositol catabolic process|L-ascorbic acid biosynthetic process|inositol oxygenase activity	path:mdm00053,path:mdm00562	Ascorbate and aldarate metabolism|Inositol phosphate metabolism
LOC103403450	927.681398348862	408.531036503424	1446.8317601943	3.54154673920882	1.82437958223684	1.34751127130831e-08	2.91090549591862e-07	Up	26.0368	29.8866	40.9462	127.247	99.8589	75.7746		defensin Ec-AMP-D2-like	GO:0005576,GO:0031640,GO:0050832	extracellular region|killing of cells of other organism|defense response to fungus
LOC103403456	16.4982012097778	32.9964024195556	0	0	-Inf	8.25403437892911e-06	0.000102962330742321	Down	0.280461	0.746935	0.15809	0	0	0	IDD5	protein indeterminate-domain 5, chloroplastic-like	GO:0003700,GO:0005634,GO:0006355,GO:0009507,GO:0043565,GO:0045893,GO:0046872	DNA-binding transcription factor activity|nucleus|regulation of transcription, DNA-templated|chloroplast|sequence-specific DNA binding|positive regulation of transcription, DNA-templated|metal ion binding
LOC103403473	61.4101924444605	113.923307971511	8.89707691740949	0.0780970731611337	-3.67858770818136	2.99395332111447e-19	2.30224686416733e-17	Down	8.44013	8.49072	10.0142	0	0.208723	1.40497		lipid transfer-like protein VAS
LOC103403480	12.8904469238276	19.9718066555218	5.80908719213341	0.290864381592004	-1.78158145588047	0.0155223364775045	0.0645107601262143	Down	0.31605	0.350172	0.692303	0.110328	0.201181	0.0450928		uncharacterized LOC103403480
LOC103403492	35.1949598980071	58.9013619276744	11.4885578683399	0.195047406245833	-2.35810328145775	3.90707712659283e-07	6.49834572001871e-06	Down	2.73328	1.98473	2.6274	0.669915	0.310658	0.303646		50S ribosomal protein L25-like			path:mdm03010	Ribosome
LOC103403493	9325.75900112113	12541.3436378083	6110.17436443397	0.487202531155728	-1.03740646641255	1.68100331301791e-08	3.5519158924482e-07	Down	511.797	597.357	561.93	252.979	297.41	219.45	CLKR27	3-oxoacyl-[acyl-carrier-protein] reductase FabG-like	GO:0004316,GO:0006633,GO:0009507,GO:0051287,GO:0102131,GO:0102132	3-oxoacyl-[acyl-carrier-protein] reductase (NADPH) activity|fatty acid biosynthetic process|chloroplast|NAD binding|3-oxo-glutaryl-[acp] methyl ester reductase activity|3-oxo-pimeloyl-[acp] methyl ester reductase activity
LOC103403519	88.9869948115989	39.3690345234885	138.604955099709	3.5206592383416	1.81584559671384	2.13159800298938e-06	3.04559024675515e-05	Up	1.36141	0.731759	0.972386	2.46922	4.04691	3.27149		uncharacterized LOC103403519
LOC103403530	98.3857045962894	56.7242800910153	140.047129101564	2.46890976627389	1.30387410981887	0.00405314906300816	0.0219095266337137	Up	1.44173	0.772454	1.87204	4.19327	2.30605	2.55612	UBC25	putative ubiquitin-conjugating enzyme E2 38	GO:0005524,GO:0061631	ATP binding|ubiquitin conjugating enzyme activity	path:mdm04120	Ubiquitin mediated proteolysis
LOC103403536	61.5333595447469	90.4597653601272	32.6069537293665	0.360458084315781	-1.47209658872383	2.80749046906662e-05	0.000308175496774863	Down	1.34609	0.742346	0.90272	0.392287	0.346429	0.287817	SIS8	mitogen-activated protein kinase kinase kinase 1b-like	GO:0004674,GO:0004712,GO:0005524,GO:0005634,GO:0009651,GO:0010182	protein serine/threonine kinase activity|protein serine/threonine/tyrosine kinase activity|ATP binding|nucleus|response to salt stress|sugar mediated signaling pathway
LOC103403537	195.669646786435	285.547960418912	105.791333153958	0.370485339831381	-1.4325116389177	7.22287110428169e-09	1.62444556488073e-07	Down	7.90133	5.46227	7.40426	2.60824	1.56241	2.45359		uncharacterized LOC103403537
LOC103403544	4335.79888043383	1668.16397714258	7003.43378372509	4.19828858534721	2.06980133917404	1.17761304149207e-27	1.75974237488944e-25	Up	108.319	87.7384	91.3557	351.242	397.648	325.089	PHOS32	universal stress protein PHOS32-like	GO:0002238,GO:0005524,GO:0005634,GO:0005829,GO:0005886,GO:0009507	response to molecule of fungal origin|ATP binding|nucleus|cytosol|plasma membrane|chloroplast
LOC103403551	8.73256188185062	3.19240286339115	14.2727209003101	4.47083952466726	2.1605457630307	0.0137860000375998	0.0588288584143441	Up	0.0913459	0.134666	0.156033	0.241102	0.485124	0.399156	NRPB9B	DNA-directed RNA polymerases II, IV and V subunit 9B	GO:0000418,GO:0000419,GO:0003676,GO:0003899,GO:0005665,GO:0005730,GO:0006351,GO:0006379,GO:0008270,GO:0080188	RNA polymerase IV complex|RNA polymerase V complex|nucleic acid binding|DNA-directed 5'-3' RNA polymerase activity|RNA polymerase II, core complex|nucleolus|transcription, DNA-templated|mRNA cleavage|zinc ion binding|RNA-directed DNA methylation	path:mdm03020	RNA polymerase
LOC103403575	75.4791479311969	34.6746437406276	116.283652121766	3.35356443721782	1.74569532304909	7.15684223185528e-06	9.04827109906169e-05	Up	1.93894	1.91549	1.45642	5.17142	6.52407	3.94114		uncharacterized LOC103403575
LOC103403579	23.888317974048	38.7109964168572	9.06563953123875	0.234187708154446	-2.09426274001324	0.000103713697551419	0.000972714361700305	Down	3.53552	2.6305	3.04735	0.477075	0.511226	0.821112	PGR5	protein PROTON GRADIENT REGULATION 5, chloroplastic	GO:0009055,GO:0009414,GO:0009507,GO:0009534,GO:0009535,GO:0009644,GO:0009773,GO:0010117,GO:0071484	electron transfer activity|response to water deprivation|chloroplast|chloroplast thylakoid|chloroplast thylakoid membrane|response to high light intensity|photosynthetic electron transport in photosystem I|photoprotection|cellular response to light intensity
LOC103403586	323.984947145755	156.632177623678	491.337716667833	3.13688875505717	1.64933436712442	3.72229335013523e-13	1.53936211441398e-11	Up	2.23049	3.3294	2.58548	8.66855	6.15633	8.25033		uncharacterized LOC103403586
LOC103403589	791.331761255577	1147.50953372034	435.153988790813	0.379216011722361	-1.3989082141302	6.85394589677287e-05	0.000679766991267347	Down	17.2615	16.0005	24.604	9.08939	6.34221	4.09415	APRR5	two-component response regulator-like APRR3	GO:0000160,GO:0005634,GO:0048511	phosphorelay signal transduction system|nucleus|rhythmic process	path:mdm04712	Circadian rhythm - plant
LOC103403615	3.4568360012005	6.913672002401	0	0	-Inf	0.00448820573148403	0.0238433359273817	Down	0.243552	0.0399435	0.0917531	0	0	0		early nodulin-75-like
LOC103403622	65.7821611989442	0.34531611015676	131.219006287732	379.9967694185	8.56984334316326	7.60752707311931e-39	2.00492918045208e-36	Up	0	0	0.0143974	1.63594	1.45003	1.67949		uncharacterized LOC103403622
LOC103403654	23.7531334760685	47.1725809922885	0.333685959848413	0.00707372700049975	-7.14331374312187	2.99631795383554e-15	1.62665276182944e-13	Down	1.95413	0.968339	1.17028	0	0.0393474	0		uncharacterized LOC103403654
LOC103403664	4.07684586562964	8.15369173125928	0	0	-Inf	0.00160184044168301	0.0100517620110998	Down	0.689911	0.466299	0.541803	0	0	0	RLM1B	disease resistance protein RML1B-like	GO:0005524,GO:0007165,GO:0043531,GO:0050832	ATP binding|signal transduction|ADP binding|defense response to fungus
LOC103403673	10.3711119152806	1.25209260961443	19.4901312209467	15.5660460506579	3.96033062520478	0.003605898243628	0.0198283365103899	Up	0.136377	0.0658592	0.0767277	1.27992	1.90988	0.357311		major allergen Mal d 1-like	GO:0006952,GO:0009607	defense response|response to biotic stimulus
LOC103403675	1657.5708055747	3091.83387063835	223.307740511049	0.0722250126799161	-3.79135763770342	4.55477173986734e-71	4.00129796178043e-68	Down	209.54	218.535	190.076	14.4748	15.4076	9.95613		major allergen Pru ar 1-like	GO:0006952,GO:0009607	defense response|response to biotic stimulus
LOC103403687	37.6219083182452	1.29675960405279	73.9470570324376	57.0244915104769	5.83350977191651	4.50558915320935e-21	4.04387088394858e-19	Up	0.014111	0	0.0317828	0.794252	1.03714	1.06952		uncharacterized LOC103403687
LOC103403689	9245.14359323982	5252.41648401758	13237.8707024621	2.52033911300507	1.33361786219174	5.03611156607865e-13	2.03621860949261e-11	Up	96.4251	110.462	102.89	232.031	199.472	254.933	IMPA1	importin subunit alpha-2	GO:0005618,GO:0005635,GO:0005643,GO:0005654,GO:0005730,GO:0005829,GO:0006606,GO:0006607,GO:0008139,GO:0008565,GO:0061608	cell wall|nuclear envelope|nuclear pore|nucleoplasm|nucleolus|cytosol|protein import into nucleus|NLS-bearing protein import into nucleus|nuclear localization sequence binding|protein transporter activity|nuclear import signal receptor activity
LOC103403690	147.734698671973	68.7732335642348	226.696163779712	3.29628479033163	1.72084089296099	1.22454241122357e-10	3.65974067024446e-09	Up	2.78176	3.76358	3.32959	9.46321	10.6736	7.53458	GATA15	GATA transcription factor 15	GO:0003700,GO:0005634,GO:0008270,GO:0043565	DNA-binding transcription factor activity|nucleus|zinc ion binding|sequence-specific DNA binding
LOC103403720	79.6712002230068	46.8623266073713	112.480073838642	2.40022384678079	1.26316895899261	7.718708610031e-05	0.000752658468230066	Up	3.42075	3.35136	2.73339	7.32309	7.6024	5.60402	RAP2-3	ethylene-responsive transcription factor RAP2-3	GO:0003677,GO:0003700,GO:0005634,GO:0005737,GO:0005886,GO:0008219,GO:0009723,GO:0009735,GO:0009753,GO:0009873,GO:0010286,GO:0043565,GO:0045893,GO:0051707	DNA binding|DNA-binding transcription factor activity|nucleus|cytoplasm|plasma membrane|cell death|response to ethylene|response to cytokinin|response to jasmonic acid|ethylene-activated signaling pathway|heat acclimation|sequence-specific DNA binding|positive regulation of transcription, DNA-templated|response to other organism
LOC103403734	126.742357550728	206.841280861901	46.6434342395557	0.225503507062004	-2.14877822423767	1.01392902515747e-13	4.56425503716072e-12	Down	4.69687	3.38026	4.08733	1.5603	1.08105	0.573256		epoxide hydrolase A-like
LOC103403751	765.426255680498	494.81389926455	1036.03861209645	2.09379448240303	1.06611984065983	0.0155235275143315	0.0645107601262143	Up	10.6224	9.25694	9.91488	12.5124	25.8617	18.7198	DGK7	diacylglycerol kinase 7-like	GO:0003951,GO:0004143,GO:0005524,GO:0005886,GO:0006952,GO:0007205,GO:0048364,GO:0048366	NAD+ kinase activity|diacylglycerol kinase activity|ATP binding|plasma membrane|defense response|protein kinase C-activating G protein-coupled receptor signaling pathway|root development|leaf development	path:mdm00561,path:mdm00564,path:mdm04070	Glycerolipid metabolism|Glycerophospholipid metabolism|Phosphatidylinositol signaling system
LOC103403764	1959.35281717575	180.471231868906	3738.23440248259	20.7137412637491	4.37251624792364	1.75863314700692e-18	1.27456937329327e-16	Up	21.3685	12.5459	19.5087	349.807	225.85	409.554	FPF1	flowering-promoting factor 1-like protein 3	GO:0009909	regulation of flower development
LOC103403776	159.092861539529	86.9786164981181	231.207106580941	2.65820630276343	1.41045307618062	5.46769312896278e-08	1.06883630349717e-06	Up	1.56702	4.83442	3.70862	7.58086	8.00307	8.52977	KAI2	probable esterase KAI2	GO:0005634,GO:0005829,GO:0009640,GO:0009704,GO:0016787,GO:0080167	nucleus|cytosol|photomorphogenesis|de-etiolation|hydrolase activity|response to karrikin
LOC103403779	53.7689363019495	86.6649073482703	20.8729652556286	0.240846795944163	-2.0538123634317	6.368071718539e-08	1.22583266348237e-06	Down	1.4586	1.21238	0.975893	0.40078	0.204241	0.228934	ACBP4	acyl-CoA-binding domain-containing protein 6	GO:0000062,GO:0005634,GO:0005737,GO:0005829,GO:0006869,GO:0008289,GO:0009416,GO:0009723,GO:0009753	fatty-acyl-CoA binding|nucleus|cytoplasm|cytosol|lipid transport|lipid binding|response to light stimulus|response to ethylene|response to jasmonic acid
LOC103403786	523.341323271299	17.0801059432551	1029.60254059934	60.2808052842278	5.91362678474616	4.95609221387555e-06	6.48362424549875e-05	Up	1.15266	1.23257	1.36265	55.7543	28.6887	107.968	VIT_05s0020g01820	CASP-like protein 1E2	GO:0005886,GO:0016021,GO:0051539	plasma membrane|integral component of membrane|4 iron, 4 sulfur cluster binding
LOC103403788	5317.06064972161	8501.61016352284	2132.51113592037	0.250836146906636	-1.99518283125584	7.56405494144584e-15	3.89488370785995e-13	Down	202.295	280.149	241.68	69.1777	46.7782	47.5707	BAM9	inactive beta-amylase 9-like	GO:0000272,GO:0005737,GO:0016161	polysaccharide catabolic process|cytoplasm|beta-amylase activity
LOC103403793	5.58127221459424	11.1625444291885	0	0	-Inf	0.000146657804002838	0.00131141571191927	Down	0.04237	0.142624	0.165983	0	0	0	RUK	serine/threonine-protein kinase RUNKEL-like	GO:0000911,GO:0000914,GO:0005524,GO:0005819,GO:0005874,GO:0006468,GO:0007349,GO:0008017,GO:0009506,GO:0009524,GO:0009555,GO:0009556,GO:0009574,GO:0010245,GO:0010342,GO:0016740	cytokinesis by cell plate formation|phragmoplast assembly|ATP binding|spindle|microtubule|protein phosphorylation|cellularization|microtubule binding|plasmodesma|phragmoplast|pollen development|microsporogenesis|preprophase band|radial microtubular system formation|endosperm cellularization|transferase activity
LOC103403796	146.95128088015	211.938035185112	81.9645265751877	0.386738163839246	-1.37057095636554	2.04269003103412e-07	3.61830211393908e-06	Down	2.10658	2.39098	1.85383	0.901982	0.544499	0.844041		uncharacterized LOC103403796
LOC103403809	552.918027900299	351.115768134876	754.720287665722	2.14949129648831	1.1039952687122	8.34445455634782e-08	1.56269856323335e-06	Up	11.0101	12.1414	10.5255	20.4982	25.0389	19.7158		uncharacterized LOC103403809
LOC103403813	976.04333085562	1719.11953409271	232.967127618526	0.135515374584745	-2.8834715563792	3.83953204892196e-43	1.25916873736129e-40	Down	17.8708	16.8623	16.9608	2.65873	1.8053	2.25973	PPD	pyruvate, phosphate dikinase, chloroplastic-like	GO:0005524,GO:0006090,GO:0009507,GO:0015979,GO:0016301,GO:0046872,GO:0050242	ATP binding|pyruvate metabolic process|chloroplast|photosynthesis|kinase activity|metal ion binding|pyruvate, phosphate dikinase activity	path:mdm00620,path:mdm00710	Pyruvate metabolism|Carbon fixation in photosynthetic organisms
LOC103403814	833.760698770834	1234.53534772176	432.986049819904	0.350727948469799	-1.51157569562768	9.50834648456201e-07	1.47404793897033e-05	Down	11.8887	11.5308	14.3838	6.98618	2.34076	2.51884	PPD	pyruvate, phosphate dikinase, chloroplastic-like	GO:0005524,GO:0006090,GO:0009507,GO:0015979,GO:0016301,GO:0046872,GO:0050242	ATP binding|pyruvate metabolic process|chloroplast|photosynthesis|kinase activity|metal ion binding|pyruvate, phosphate dikinase activity	path:mdm00620,path:mdm00710	Pyruvate metabolism|Carbon fixation in photosynthetic organisms
LOC103403831	222.552969563377	59.8986823684438	385.207256758311	6.43098047447615	2.68503870922179	5.57579723522978e-26	7.24853640579872e-24	Up	3.94263	1.469	2.76768	15.1502	15.2468	13.3653		endo-1,3;1,4-beta-D-glucanase-like	GO:0005576,GO:0016787	extracellular region|hydrolase activity
LOC103403867	545.139572771683	33.1218489798887	1057.15729656348	31.9172186675138	4.99626303249356	3.35295576932886e-23	3.6000810278831e-21	Up	0.647736	0.80264	0.830046	19.1176	31.2621	30.8708	PER51	peroxidase 51-like	GO:0004601,GO:0005576,GO:0006979,GO:0009651,GO:0020037,GO:0042744,GO:0046872	peroxidase activity|extracellular region|response to oxidative stress|response to salt stress|heme binding|hydrogen peroxide catabolic process|metal ion binding	path:mdm00940	Phenylpropanoid biosynthesis
LOC103403871	131.742372874577	45.7007726103498	217.783973138804	4.76543307036965	2.25260732852854	3.70338867855859e-15	1.99185969928411e-13	Up	0.830915	1.23507	0.758043	3.51078	3.10229	4.36417	EIX2	receptor-like protein EIX1	GO:0005886,GO:0016021,GO:0050832	plasma membrane|integral component of membrane|defense response to fungus
LOC103403873	4.37400520573849	0	8.74801041147698	Inf	Inf	0.000756082774403542	0.00535520147323691	Up	0	0	0	0.669739	0.728204	1.38786		classical arabinogalactan protein 26-like
LOC103403905	287.373194747719	547.971469482047	26.7749200133913	0.0488618869860131	-4.35514660998462	1.23812471243617e-52	6.64689544694899e-50	Down	6.27219	8.38315	7.71259	0.446488	0.256702	0.247035	LOX5	probable linoleate 9S-lipoxygenase 5	GO:0009507,GO:0010311,GO:0031408,GO:0034440,GO:0046872,GO:0048364,GO:1900366,GO:1990136	chloroplast|lateral root formation|oxylipin biosynthetic process|lipid oxidation|metal ion binding|root development|negative regulation of defense response to insect|linoleate 9S-lipoxygenase activity	path:mdm00591	Linoleic acid metabolism
LOC103403957	45.5448114865435	7.72387078452827	83.3657521885587	10.7932608551077	3.43205889194432	3.97910448332348e-09	9.40899175950634e-08	Up	0.161372	0.112998	0.0657079	1.19172	0.68725	1.50115	NPY2	BTB/POZ domain-containing protein NPY2-like	GO:0009958,GO:0016567,GO:0071944	positive gravitropism|protein ubiquitination|cell periphery
LOC103403958	1696.22798911661	2303.80337399109	1088.65260424212	0.472545798192904	-1.08147393566189	9.48960000025833e-09	2.09894926491647e-07	Down	37.3563	36.8027	35.9787	16.2039	11.927	18.2738		uncharacterized LOC103403958
LOC103403962	23.7070113106276	47.4140226212552	0	0	-Inf	1.71533883846082e-16	1.04250886639369e-14	Down	1.54247	1.64853	2.12409	0	0	0		uncharacterized LOC103403962
LOC103403965	15.9984611126978	2.80241975879603	29.1945024665996	10.4176051339083	3.38095175460172	0.000195730657956189	0.00168625015576521	Up	0.0386134	0.0494338	0.0288319	0.252962	0.516289	0.255219	PUB44	U-box domain-containing protein 43-like	GO:0004842,GO:0005634,GO:0005737,GO:0005886,GO:0010115,GO:0010150,GO:0010271,GO:0010380,GO:0070696,GO:0090359	ubiquitin-protein transferase activity|nucleus|cytoplasm|plasma membrane|regulation of abscisic acid biosynthetic process|leaf senescence|regulation of chlorophyll catabolic process|regulation of chlorophyll biosynthetic process|transmembrane receptor protein serine/threonine kinase binding|negative regulation of abscisic acid biosynthetic process
LOC103403966	1925.49278775224	2600.08163186334	1250.90394364115	0.48110179630964	-1.05558590880713	1.67091539469406e-06	2.45015148657288e-05	Down	64.6061	68.8692	56.9861	26.9655	35.7771	18.038	CIPK4	CBL-interacting serine/threonine-protein kinase 4-like	GO:0004674,GO:0005524,GO:0005634,GO:0005737,GO:0006468,GO:0035556	protein serine/threonine kinase activity|ATP binding|nucleus|cytoplasm|protein phosphorylation|intracellular signal transduction
LOC103403972	60.6148389722234	18.7270108097671	102.50266713468	5.47351994271393	2.45246890809775	4.26779066142602e-11	1.37165467045167e-09	Up	0.720967	0.593374	0.853549	3.85492	2.39883	3.48363	IAA3	auxin-induced protein 22D	GO:0003700,GO:0005634,GO:0009733,GO:0009734,GO:0044212	DNA-binding transcription factor activity|nucleus|response to auxin|auxin-activated signaling pathway|transcription regulatory region DNA binding	path:mdm04075	Plant hormone signal transduction
LOC103403976	53.8970194071891	107.101442898263	0.69259591611497	0.00646672815391361	-7.27274832051783	1.48918316148548e-20	1.27349321095764e-18	Down	2.02168	0.978065	1.64641	0	0.0141682	0.0158631	DRIP2	E3 ubiquitin protein ligase DRIP2-like	GO:0004842,GO:0009414,GO:0016567,GO:0046872,GO:0051865	ubiquitin-protein transferase activity|response to water deprivation|protein ubiquitination|metal ion binding|protein autoubiquitination
LOC103404057	7.95906192536936	0	15.9181238507387	Inf	Inf	0.00757290681428171	0.0364318899014316	Up	0	0	0	0.366238	0	0.208029	RCH2	receptor-like protein kinase 2
LOC103404072	925.079240799098	602.511110328698	1247.6473712695	2.07074583336538	1.0501504857428	1.22866266480854e-06	1.84937334645896e-05	Up	5.25075	6.88801	5.22075	12.7796	8.70958	11.4917	ARF19	auxin response factor 19-like	GO:0003677,GO:0005634,GO:0006355,GO:0009734	DNA binding|nucleus|regulation of transcription, DNA-templated|auxin-activated signaling pathway
LOC103404076	87.5466833938727	22.3819878397896	152.711378947956	6.82295871309843	2.77039748632839	0.00206610495211192	0.0124472947967008	Up	1.19573	1.18202	0.343967	2.37	5.42034	8.01519	At5g07610	F-box protein At5g07610-like
LOC103404086	15.0682801528103	7.23967150334792	22.8968888022727	3.16269720134184	1.6611554379186	0.0108596289314234	0.0486434862054949	Up	0.229109	0.488255	0.361774	0.952555	1.0829	0.967965		uncharacterized LOC103404086
LOC103404093	22.9645562625623	43.5165000806431	2.4126124444815	0.0554413254744876	-4.17289444036938	2.56987463730569e-10	7.35445861159842e-09	Down	1.76913	1.98706	1.95003	0.124153	0.11473	0.0427508	GTE1	transcription factor GTE1-like	GO:0005634,GO:0010030,GO:0045893	nucleus|positive regulation of seed germination|positive regulation of transcription, DNA-templated
LOC103404104	146.850170608043	69.0243865332124	224.675954682873	3.25502284000403	1.7026676665998	0.000240964931647385	0.00200908063516183	Up	1.33141	2.38168	1.87801	4.62909	7.84214	4.13304	CIPK21	CBL-interacting serine/threonine-protein kinase 21	GO:0004674,GO:0005524,GO:0005634,GO:0005737,GO:0005829,GO:0006468,GO:0009705,GO:0035556,GO:0071470,GO:0071472	protein serine/threonine kinase activity|ATP binding|nucleus|cytoplasm|cytosol|protein phosphorylation|plant-type vacuole membrane|intracellular signal transduction|cellular response to osmotic stress|cellular response to salt stress
LOC103404107	383.53834819259	517.759369507075	249.317326878105	0.481531270241356	-1.05429860635698	0.00469335312204309	0.0246575402334232	Down	9.59534	15.304	14.1023	8.71226	3.88645	4.31161	COL5	zinc finger protein CONSTANS-LIKE 5	GO:0003700,GO:0005634,GO:0006355,GO:0008270,GO:0009909	DNA-binding transcription factor activity|nucleus|regulation of transcription, DNA-templated|zinc ion binding|regulation of flower development
LOC103404112	2.12134605742605	0	4.24269211485211	Inf	Inf	0.049900246882712	0.159589026511278	Up	0	0	0	0.135788	0	0.0678238		uncharacterized LOC103404112
LOC103404133	42.7837923094978	58.3121896123997	27.2553950065959	0.467404760269886	-1.09725566760705	0.0059537779827817	0.0300382916325864	Down	2.87222	1.67322	2.27606	0.876971	0.689302	1.292	MAK3	N-alpha-acetyltransferase MAK3-like	GO:0004596,GO:0005737,GO:0017196,GO:0031417	peptide alpha-N-acetyltransferase activity|cytoplasm|N-terminal peptidyl-methionine acetylation|NatC complex
LOC103404151	70.3537083982384	0.901947347155209	139.805469449322	155.004025335044	7.27616187143875	0.000137677005567834	0.001242221099101	Up	0	0.057428	0	2.11085	6.76109	14.3271		uncharacterized LOC103404151
LOC103404160	115.116134356744	70.392320433961	159.839948279528	2.27070150968361	1.18313807205018	0.00122237361026355	0.00802459487353718	Up	1.3519	1.91579	2.04318	6.27644	3.29135	3.9412	SKL1	probable inactive shikimate kinase like 1, chloroplastic	GO:0009507,GO:0009570,GO:0009658,GO:0010027,GO:0016310	chloroplast|chloroplast stroma|chloroplast organization|thylakoid membrane organization|phosphorylation
LOC103404162	10.2185181960437	17.0233660680606	3.41367032402674	0.200528515358164	-2.31812069092202	0.0056039133639696	0.0285765080776568	Down	0.443184	1.09785	0.610016	0.150857	0.186082	0		uncharacterized LOC103404162
LOC103404163	2048.11599908803	2845.73787291241	1250.49412526366	0.439427024240947	-1.18630449836349	2.85688031887419e-10	8.12883082373037e-09	Down	48.8889	55.3153	42.6391	17.8942	16.1304	24.4168	At3g26840	acyltransferase-like protein At3g26840, chloroplastic	GO:0004144,GO:0009507,GO:0010287,GO:0019432,GO:0033306	diacylglycerol O-acyltransferase activity|chloroplast|plastoglobule|triglyceride biosynthetic process|phytol metabolic process
LOC103404165	14.6325644360494	4.6183873338626	24.6467415382362	5.33665536398888	2.41593584649237	0.000535277556558587	0.00397278452755592	Up	0.223179	0.107693	0.0627657	0.260631	0.52403	0.645149		uncharacterized LOC103404165
LOC103404174	95.807311244467	35.5861433215756	156.028479167358	4.38452904990015	2.13242188853955	6.3541493759949e-12	2.2826120249082e-10	Up	0.306238	0.474664	0.421496	1.52014	1.18805	0.809859		uncharacterized LOC103404174
LOC103404175	104.468048469777	185.821336266903	23.1147606726501	0.124392392913639	-3.00702983322379	1.81661826380368e-16	1.09945226446072e-14	Down	1.77237	2.85043	2.72054	0.303488	0.337301	0.181278	CHX18	cation/H(+) antiporter 18-like	GO:0005770,GO:0006813,GO:0006885,GO:0012505,GO:0015299,GO:0016021	late endosome|potassium ion transport|regulation of pH|endomembrane system|solute:proton antiporter activity|integral component of membrane
LOC103404181	20.8120313369576	35.7118020235329	5.91226065038235	0.165554811445425	-2.59461915514257	0.000529288354122466	0.00393437676564366	Down	1.38865	0.284827	0.829619	0.213472	0.0278296	0.0312272	SPL13B	teosinte glume architecture 1-like	GO:0003677,GO:0005634,GO:0046872,GO:0048653	DNA binding|nucleus|metal ion binding|anther development
LOC103404187	47.7446165641446	5.00837043845772	90.4808626898314	18.0659285892787	4.17519950613251	3.66538175942168e-09	8.72409008256441e-08	Up	0.222586	0.0534849	0.0312699	2.65467	1.49995	3.23857	N	TMV resistance protein N-like	GO:0005524,GO:0005737,GO:0007165,GO:0009626,GO:0043531	ATP binding|cytoplasm|signal transduction|plant-type hypersensitive response|ADP binding
LOC103404198	9.83898672936738	15.5201204894686	4.15785296926617	0.267900817657153	-1.90022911046661	0.0219376855260766	0.0847286841727899	Down	0.410698	0.933654	0.851256	0.34866	0.19569	0.0732056		uncharacterized LOC103404198
LOC103404213	105.156577281021	147.547309111856	62.7658454501853	0.425394714603723	-1.23312598651207	0.000166865487701741	0.00147302999039996	Down	3.50796	2.48825	4.31667	1.04751	1.77977	1.06565	At3g27220	kelch repeat-containing protein At3g27220-like	GO:0005768,GO:0005794,GO:0005802,GO:0009061,GO:0016021	endosome|Golgi apparatus|trans-Golgi network|anaerobic respiration|integral component of membrane
LOC103404218	10.9594233536716	17.0523409818754	4.86650572546779	0.285386371914584	-1.80901165159674	0.0199569597223449	0.0787149846604465	Down	0.341229	0.188018	0.291759	0.0676718	0.0759751	0.0850883	SYN2	sister chromatid cohesion 1 protein 2	GO:0000278,GO:0000798,GO:0003682,GO:0005634,GO:0006302,GO:0007062,GO:0051301	mitotic cell cycle|nuclear cohesin complex|chromatin binding|nucleus|double-strand break repair|sister chromatid cohesion|cell division
LOC103404219	6.86173476180593	13.7234695236119	0	0	-Inf	1.87758195593643e-05	0.000215654124019798	Down	0.186485	0.212066	0.458527	0	0	0		epoxide hydrolase A-like
LOC103404225	5.18554268017115	0.648379802026393	9.7227055583159	14.9953862349341	3.90644677695049	0.00371888334927151	0.0203607985449256	Up	0.0294837	0	0.0330477	0.0605945	0.304181	0.339279	LHT1	lysine histidine transporter 1-like	GO:0003333,GO:0005886,GO:0015171,GO:0015293,GO:0016021,GO:0043090,GO:0080167	amino acid transmembrane transport|plasma membrane|amino acid transmembrane transporter activity|symporter activity|integral component of membrane|amino acid import|response to karrikin
LOC103404238	94.2234649164899	130.141728692996	58.3052011399842	0.448013114052958	-1.15838713201908	0.000801505464079482	0.00562606377812692	Down	2.30643	2.1544	1.30859	0.684952	0.739986	0.814081	SERGT1	peptidyl serine alpha-galactosyltransferase-like	GO:0005789,GO:0016021,GO:0016757	endoplasmic reticulum membrane|integral component of membrane|transferase activity, transferring glycosyl groups	path:mdm00514	Other types of O-glycan biosynthesis
LOC103404249	33.8924047674009	67.4511235749535	0.333685959848413	0.00494707785671816	-7.65920767996698	4.06872578083268e-21	3.67452836094515e-19	Down	3.34215	3.79536	3.56155	0	0.0457915	0		uncharacterized LOC103404249
LOC103404253	28.1390151837251	47.963463165206	8.31456720224417	0.173352102903941	-2.52822275716008	9.98227993124435e-07	1.53602067519519e-05	Down	1.28528	1.43873	1.21429	0.171445	0.236586	0.147304	At5g14450	GDSL esterase/lipase At5g14450	GO:0005576,GO:0009505,GO:0009506,GO:0016042,GO:0016788	extracellular region|plant-type cell wall|plasmodesma|lipid catabolic process|hydrolase activity, acting on ester bonds
LOC103404266	58.5198486348184	111.797086011528	5.24261125810917	0.0468939884315821	-4.41445320127349	1.12275654805797e-22	1.16245401172145e-20	Down	1.60094	1.88461	1.65309	0.0696706	0.0633733	0.10634	N	TMV resistance protein N-like	GO:0005524,GO:0005737,GO:0007165,GO:0009626,GO:0043531	ATP binding|cytoplasm|signal transduction|plant-type hypersensitive response|ADP binding
LOC103404282	13.9485449480408	4.48191873899025	23.4151711570915	5.22436316245367	2.38525518678871	0.000692752033686499	0.00496363852114968	Up	0.0667037	0.0643099	0.0749616	0.454102	0.437277	0.596215	MAIL3	serine/threonine-protein phosphatase 7 long form homolog	GO:0004721,GO:0005634,GO:0046872	phosphoprotein phosphatase activity|nucleus|metal ion binding
LOC103404290	13.590087402988	22.6897746131496	4.49040019282641	0.197904133883465	-2.33712634672182	0.00119228893322189	0.0078662849736237	Down	0.500931	0.442374	0.471402	0.062437	0.0935086	0.0836247		uncharacterized LOC103404290
LOC103404294	270.22271145822	95.6747225152175	444.770700401222	4.6487796223342	2.21685203581569	1.2668174299723e-11	4.36164338419204e-10	Up	2.91834	3.68071	1.9972	9.21547	13.8175	12.2313	HHP4	heptahelical transmembrane protein 4-like	GO:0009725,GO:0009744,GO:0016021,GO:0038023	response to hormone|response to sucrose|integral component of membrane|signaling receptor activity
LOC103404306	43.4091268918612	68.5597160028661	18.2585377808564	0.266315831589692	-1.90878990037173	4.4438639253397e-05	0.000466428729889927	Down	1.15907	1.35708	0.656629	0.294023	0.127984	0.365545	RFS5	probable galactinol--sucrose galactosyltransferase 5	GO:0006979,GO:0009414,GO:0009507,GO:0009737,GO:0010325,GO:0047274	response to oxidative stress|response to water deprivation|chloroplast|response to abscisic acid|raffinose family oligosaccharide biosynthetic process|galactinol-sucrose galactosyltransferase activity	path:mdm00052	Galactose metabolism
LOC103404313	217.411084038417	413.38955930491	21.4326087719238	0.0518460330927599	-4.26962258176499	1.02146021949224e-48	4.48668663076971e-46	Down	6.01457	7.38817	5.945	0.180029	0.424441	0.32586	RGA3	putative disease resistance protein RGA3	GO:0005524,GO:0006952,GO:0043531	ATP binding|defense response|ADP binding
LOC103404319	1170.46468970553	744.135572770406	1596.79380664066	2.14583721712942	1.10154063762864	0.0071170320638203	0.0346121052726305	Up	8.1936	6.77979	7.84307	9.41207	19.2137	15.2975	DRM2	DNA (cytosine-5)-methyltransferase DRM2-like	GO:0003677,GO:0003886,GO:0005634	DNA binding|DNA (cytosine-5-)-methyltransferase activity|nucleus
LOC103404347	114.933043918021	71.2401015882911	158.625986247751	2.22663896753655	1.15486765513107	0.00143542667175398	0.00916990286781577	Up	1.11005	1.24521	0.882583	1.40098	2.57898	2.26218	KLCR2	protein KINESIN LIGHT CHAIN-RELATED 2	GO:0005886,GO:0009860,GO:0031347	plasma membrane|pollen tube growth|regulation of defense response
LOC103404356	18025.9033032403	10977.5649957948	25074.2416106859	2.28413510831329	1.19164798972379	6.60359670427488e-11	2.06960290223707e-09	Up	447.101	452.238	414.149	823.827	1013.71	868.241		uncharacterized LOC103404356
LOC103404375	1074.75990286501	353.705027185056	1795.81477854495	5.0771536747353	2.34401992806502	1.06628432484614e-13	4.7722703887761e-12	Up	6.54215	5.45002	14.5059	38.2128	46.8277	34.373	NPF5.9	protein NRT1/ PTR FAMILY 5.9	GO:0015333,GO:0016021,GO:0035673,GO:1904680	peptide:proton symporter activity|integral component of membrane|oligopeptide transmembrane transporter activity|peptide transmembrane transporter activity
LOC103404388	204.468636850516	351.448534045622	57.4887396554093	0.163576552713538	-2.61196212966522	1.42935833242349e-23	1.58413962241395e-21	Down	6.00949	7.09702	7.79958	0.885194	0.940532	1.26492	BIR2	inactive LRR receptor-like serine/threonine-protein kinase BIR2
LOC103404419	11.0420160548454	17.1670783913866	4.91695371830408	0.286417619014957	-1.80380785199307	0.0178327664176198	0.07187152765839	Down	0.410855	0.413478	0.298523	0.0424318	0.0574789	0.150381	WRKY72	probable WRKY transcription factor 72	GO:0003700,GO:0005634,GO:0006952,GO:0043565	DNA-binding transcription factor activity|nucleus|defense response|sequence-specific DNA binding
LOC103404424	13.0093724121332	4.00018706936718	22.0185577548992	5.50438201340981	2.46058059898747	0.000843342297131199	0.00586857733889426	Up	0.0328461	0.317812	0.0740579	0.544517	0.835832	0.485402	ARB_05372	aldose 1-epimerase	GO:0004034,GO:0005576,GO:0019318,GO:0030246	aldose 1-epimerase activity|extracellular region|hexose metabolic process|carbohydrate binding	path:mdm00010,path:mdm00052	Glycolysis / Gluconeogenesis|Galactose metabolism
LOC103404425	159.716161531328	55.2708435428816	264.161479519775	4.77940017895378	2.25682956943021	1.3146036921194e-16	8.17818906320632e-15	Up	1.20514	1.53799	0.795581	4.67251	4.4466	5.98965	ARB_01444	probable endo-1,3(4)-beta-glucanase ARB_01444	GO:0005576,GO:0005618,GO:0008152,GO:0052861,GO:0052862	extracellular region|cell wall|metabolic process|glucan endo-1,3-beta-glucanase activity, C-3 substituted reducing group|glucan endo-1,4-beta-glucanase activity, C-3 substituted reducing group
LOC103404434	440.039450545894	592.679968274272	287.398932817516	0.484914200245954	-1.04419859259785	8.03223189873647e-07	1.2662012112255e-05	Down	5.41625	6.43842	5.59663	2.60946	2.33626	2.47684	ABCB19	ABC transporter B family member 19-like	GO:0005524,GO:0005886,GO:0008361,GO:0009637,GO:0009639,GO:0009640,GO:0009733,GO:0009734,GO:0009926,GO:0009958,GO:0010218,GO:0010329,GO:0010540,GO:0010541,GO:0016021,GO:0042626,GO:0043481,GO:0048364,GO:0048443,GO:0048527,GO:0060918,GO:0090691	ATP binding|plasma membrane|regulation of cell size|response to blue light|response to red or far red light|photomorphogenesis|response to auxin|auxin-activated signaling pathway|auxin polar transport|positive gravitropism|response to far red light|auxin efflux transmembrane transporter activity|basipetal auxin transport|acropetal auxin transport|integral component of membrane|ATPase activity, co…	path:mdm02010	ABC transporters
LOC103404439	90.4431314285356	18.9673538858296	161.918908971242	8.53671576677915	3.09368114498738	3.893647812582e-17	2.59487011693683e-15	Up	0.648942	0.152559	0.235911	2.97744	1.85833	2.65165		uncharacterized LOC103404439
LOC103404442	47.8247078588579	1.80872384661288	93.8406918711029	51.882266077729	5.69716958888917	9.92646801123905e-25	1.22454598998221e-22	Up	0.063017	0.122288	0	2.76895	2.04591	3.26221	MYB306	myb-related protein 306-like	GO:0003677,GO:0005634	DNA binding|nucleus
LOC103404445	159.027649911795	1.55274172533283	316.502558098257	203.834644831492	7.67125547032039	6.05127726083408e-54	3.43973583905059e-51	Up	0.0818095	0.0777415	0.0455932	13.1523	9.06127	12.3969	NIP2-1	aquaporin NIP2-1-like	GO:0005215,GO:0005886,GO:0015115,GO:0015267,GO:0015708,GO:0016020,GO:0016021,GO:0048226	transporter activity|plasma membrane|silicate transmembrane transporter activity|channel activity|silicic acid import across plasma membrane|membrane|integral component of membrane|Casparian strip
LOC103404452	8183.14988827676	4304.99046822045	12061.3093083331	2.80170406819015	1.48630457821641	1.72570920685652e-09	4.37310401282958e-08	Up	210.947	124.786	149.923	331.691	443.211	424.123	EXPA15	expansin-A10
LOC103404467	203.937997147325	60.4663833466687	347.409610947981	5.74550008979693	2.52243247088189	3.96029251116362e-11	1.28565375026465e-09	Up	1.52037	2.22287	0.996294	7.25997	9.88671	8.79643	NDPK3	nucleoside diphosphate kinase III, chloroplastic/mitochondrial-like	GO:0004550,GO:0005524,GO:0005739,GO:0005743,GO:0005758,GO:0006183,GO:0006228,GO:0006241,GO:0006979,GO:0008270,GO:0009536,GO:0009543,GO:0050897	nucleoside diphosphate kinase activity|ATP binding|mitochondrion|mitochondrial inner membrane|mitochondrial intermembrane space|GTP biosynthetic process|UTP biosynthetic process|CTP biosynthetic process|response to oxidative stress|zinc ion binding|plastid|chloroplast thylakoid lumen|cobalt ion binding	path:mdm00230,path:mdm00240,path:mdm04016	Purine metabolism|Pyrimidine metabolism|MAPK signaling pathway - plant
LOC103404470	1723.95449754101	1071.93088992673	2375.97810515529	2.21654038285781	1.14830964701388	8.76292688306077e-06	0.00010833145003835	Up	18.6569	25.8339	23.6071	56.0436	36.1185	42.4719	HYP1	CSC1-like protein HYP1	GO:0005227,GO:0005886,GO:0016021	calcium activated cation channel activity|plasma membrane|integral component of membrane
LOC103404471	8.79263916067794	15.4971846803913	2.08809364096459	0.13474019210771	-2.89174783350547	0.00204696961941694	0.0123656619356589	Down	0.350889	0.224933	0.367401	0.121747	0.0219799	0		uncharacterized LOC103404471	GO:0003677,GO:0005634,GO:0006310,GO:0032196,GO:0046983	DNA binding|nucleus|DNA recombination|transposition|protein dimerization activity
LOC103404476	224.996970043249	333.952314272075	116.041625814422	0.347479627644926	-1.52499969822303	2.25896643275756e-10	6.53567234387641e-09	Down	12.7024	12.541	11.8184	2.85597	3.47889	5.16562		UPF0301 protein Cpha266_0885
LOC103404486	115.743224348976	76.6057019114435	154.880746786509	2.02179136698665	1.01563413010775	0.000281651819721612	0.00230587016484878	Up	2.08137	2.0528	2.25002	3.66403	3.58995	4.2327		UDP-glucose 4-epimerase GEPI48	GO:0003978,GO:0006012	UDP-glucose 4-epimerase activity|galactose metabolic process	path:mdm00052,path:mdm00520	Galactose metabolism|Amino sugar and nucleotide sugar metabolism
LOC103404501	132.094852880766	262.444465236747	1.74524052478467	0.0066499422009541	-7.23244248341056	6.68852728476632e-27	9.27753138686008e-25	Down	5.7875	7.91405	5.39458	0.0788889	0.0239665	0.0269298	UGT83A1	UDP-glycosyltransferase 83A1-like	GO:0008194,GO:0043231,GO:0080043,GO:0080044	UDP-glycosyltransferase activity|intracellular membrane-bounded organelle|quercetin 3-O-glucosyltransferase activity|quercetin 7-O-glucosyltransferase activity
LOC103404549	8.77403087784345	0.601298231436806	16.9467635242501	28.1836244283568	4.81678524977762	1.91841704335456e-05	0.000219648144102878	Up	0	0.0896609	0	0.966151	0.740125	0.486057	RRS1	disease resistance protein RPP5-like
LOC103404583	132.339145164982	8.53884568355194	256.139444646413	29.9969637746007	4.90674457664173	5.19015275108656e-09	1.20177738222044e-07	Up	0.212238	0.175268	0.305839	8.92933	8.38837	3.56105	At3g28050	WAT1-related protein At3g28050-like	GO:0005886,GO:0016021,GO:0022857	plasma membrane|integral component of membrane|transmembrane transporter activity
LOC103404593	27.043195920144	44.7879623348734	9.29842950541458	0.207610014402788	-2.26805205879861	1.18491255123269e-05	0.000141710457344207	Down	1.59262	1.05395	1.02557	0.226656	0.308571	0.229697		uncharacterized LOC103404593
LOC103404619	151.015787088313	203.989471027176	98.0421031494502	0.480623351076727	-1.0570213514046	4.74577330140838e-05	0.000493826159396371	Down	2.52787	1.84327	2.15483	1.19861	0.823566	1.11029		uncharacterized LOC103404619
LOC103404638	35.2506812481369	69.4578850439357	1.0434774523382	0.0150231676602038	-6.05666715016884	9.39635627148371e-20	7.56667689750868e-18	Down	4.12509	3.66738	3.63665	0.063759	0	0.0658729	Os11g0629400	protein SPIRAL1-like 2	GO:0010005,GO:0043622	cortical microtubule, transverse to long axis|cortical microtubule organization
LOC103404643	34.535711236769	16.9859428020759	52.085479671462	3.06638732264519	1.61653993873414	0.0132562941474056	0.0569164643562335	Up	0.202358	0.354083	0.244156	1.2539	0.462801	0.734118	FER	receptor-like protein kinase FERONIA
LOC103404649	164.670440671699	260.65830062265	68.6825807207487	0.263496618203535	-1.92414364889697	0.000551512056092406	0.00408178057342835	Down	5.28368	12.2679	9.25728	2.81392	2.14337	1.44156	At5g67130	PI-PLC X domain-containing protein At5g67130-like	GO:0005886,GO:0006629,GO:0008081,GO:0046658	plasma membrane|lipid metabolic process|phosphoric diester hydrolase activity|anchored component of plasma membrane
LOC103404651	3480.48152192321	4927.64225606758	2033.32078777884	0.412635634268121	-1.27705968044425	9.72291466074612e-11	2.95458381567117e-09	Down	118.944	124.41	156.864	46.0523	48.8311	49.8311	BA13	cytochrome P450 85A-like	GO:0004497,GO:0005506,GO:0016021,GO:0016705,GO:0020037	monooxygenase activity|iron ion binding|integral component of membrane|oxidoreductase activity, acting on paired donors, with incorporation or reduction of molecular oxygen|heme binding	path:mdm00905	Brassinosteroid biosynthesis
LOC103404652	112.911494425288	218.434946274911	7.38804257566519	0.0338226217995676	-4.88586769352092	1.39032940015721e-23	1.55021728117529e-21	Down	5.19619	8.20139	7.05888	0.186981	0.11445	0.352068	UPTG1	probable UDP-arabinopyranose mutase 1	GO:0005576,GO:0005618,GO:0005794,GO:0006486,GO:0009506,GO:0030244,GO:0052691,GO:0071555,GO:0071669	extracellular region|cell wall|Golgi apparatus|protein glycosylation|plasmodesma|cellulose biosynthetic process|UDP-arabinopyranose mutase activity|cell wall organization|plant-type cell wall organization or biogenesis	path:mdm00520	Amino sugar and nucleotide sugar metabolism
LOC103404664	206.026281357645	378.116616093997	33.9359466212932	0.0897499479706994	-3.47794508718929	4.08916183531572e-36	1.00461696276104e-33	Down	10.2941	8.50095	12.0524	1.14941	0.90684	0.589199	AVT6A	amino acid transporter AVT6A-like	GO:0003333,GO:0005773,GO:0005774,GO:0015171,GO:0016021	amino acid transmembrane transport|vacuole|vacuolar membrane|amino acid transmembrane transporter activity|integral component of membrane
LOC103404690	3.80372753631488	7.25657353640653	0.350881536223235	0.0483536113101931	-4.37023254775109	0.0119611307788941	0.0525702215403489	Down	0.305337	0.0979985	0.199452	0.0265103	0	0	TBL19	protein trichome birefringence-like 19	GO:0005794,GO:0016021,GO:0016413	Golgi apparatus|integral component of membrane|O-acetyltransferase activity
LOC103404698	70.4781859416309	23.9514724919629	117.004899391299	4.885081676317	2.28838268359232	1.66321865161923e-08	3.51760275350715e-07	Up	0.447212	0.253679	0.738173	1.89196	2.78725	2.92701	ICME	probable isoprenylcysteine alpha-carbonyl methylesterase ICMEL2	GO:0000139,GO:0005789,GO:0010296,GO:0016020,GO:0016021	Golgi membrane|endoplasmic reticulum membrane|prenylcysteine methylesterase activity|membrane|integral component of membrane	path:mdm00900	Terpenoid backbone biosynthesis
LOC103404717	5.63921937786437	11.2784387557287	0	0	-Inf	0.00166946567248893	0.0104280782193153	Down	0.747747	0.0450995	0.736819	0	0	0	SWEET4	bidirectional sugar transporter SWEET4-like	GO:0005887,GO:0051119	integral component of plasma membrane|sugar transmembrane transporter activity
LOC103404769	30.4085659123535	50.2997956283153	10.5173361963916	0.209093020458936	-2.25778318942729	7.43637732558108e-05	0.000730533983966775	Down	1.26147	0.642158	0.866381	0.0724121	0.131314	0.292895	SD18	G-type lectin S-receptor-like serine/threonine-protein kinase SD1-1
LOC103404771	6.47524627974809	1.54791257303037	11.4025799864658	7.36642377944047	2.8809643957322	0.00831254638522624	0.0392829695624461	Up	0	0.216429	0.0626873	0.637674	0.737076	0.470932	PBP1	calcium-binding protein PBP1-like	GO:0005509,GO:0009733	calcium ion binding|response to auxin
LOC103404777	9.08459556810751	14.6133439900109	3.5558471462041	0.243328778726809	-2.03902113560111	0.0176423890971339	0.0713025038234923	Down	0.304387	0.529074	0.479731	0.0316727	0.0287148	0.25614	BOU	mitochondrial carnitine/acylcarnitine carrier-like protein	GO:0000064,GO:0005739,GO:0005743,GO:0006839,GO:0009507,GO:0009536,GO:0016021,GO:1990575	L-ornithine transmembrane transporter activity|mitochondrion|mitochondrial inner membrane|mitochondrial transport|chloroplast|plastid|integral component of membrane|mitochondrial L-ornithine transmembrane transport
LOC103404780	189.803297935657	123.798698065846	255.807897805467	2.06632138949804	1.04706466416156	1.83133934668854e-05	0.000210927801591183	Up	1.67632	1.74768	2.20939	3.83931	3.308	3.37063	MYC2	transcription factor MYC2-like	GO:0003677,GO:0003700,GO:0005634,GO:0009269,GO:0009611,GO:0009737,GO:0009738,GO:0009753,GO:0009963,GO:0010200,GO:0019900,GO:0043565,GO:0043619,GO:0045893,GO:0046983,GO:0051090,GO:0051289,GO:2000068	DNA binding|DNA-binding transcription factor activity|nucleus|response to desiccation|response to wounding|response to abscisic acid|abscisic acid-activated signaling pathway|response to jasmonic acid|positive regulation of flavonoid biosynthetic process|response to chitin|kinase binding|sequence-specific DNA binding|regulation of transcription from RNA polymerase II promoter in response to oxida…	path:mdm04016,path:mdm04075	MAPK signaling pathway - plant|Plant hormone signal transduction
LOC103404784	30.0268846312065	46.1571538947443	13.8966153676687	0.301071755840021	-1.73182072266267	0.000284287300091414	0.00232220029012401	Down	1.0105	0.744671	0.863134	0.154243	0.374494	0.445787		uncharacterized LOC103404784
LOC103404806	10.1469037824523	16.4788077118183	3.81499985308626	0.231509458681905	-2.11085695662989	0.010533958928972	0.0474781513294307	Down	0.877212	0.976391	1.06634	0.27849	0.254351	0		sigma intracellular receptor 2-like
LOC103404866	21.9372263968707	39.0492279047784	4.825224888963	0.123567741229847	-3.01662593450946	0.000841961254689413	0.00586246462363593	Down	1.85418	1.17936	0.481266	0.17119	0.0925782	0.0345665		uncharacterized LOC103404866
LOC103404881	2.43382223087798	0	4.86764446175596	Inf	Inf	0.0208438137797913	0.0813492409095516	Up	0	0	0	0.172073	0.0891751	0.0747356	TCP1	transcription factor CYCLOIDEA-like	GO:0003677,GO:0003700,GO:0005634,GO:0009908,GO:0043565,GO:0048831,GO:2000032	DNA binding|DNA-binding transcription factor activity|nucleus|flower development|sequence-specific DNA binding|regulation of shoot system development|regulation of secondary shoot formation
LOC103404902	3.49546655526078	6.99093311052157	0	0	-Inf	0.00434518405612112	0.0232068691575076	Down	0.28369	0.327536	0.50891	0	0	0		pentatricopeptide repeat-containing protein At1g11900
LOC103404903	1331.65531422537	561.268923008607	2102.04170544212	3.7451596182707	1.9050272074905	4.2091448369701e-22	4.15044587835929e-20	Up	13.9521	11.0281	12.5026	40.29	38.4313	47.5211		uncharacterized LOC103404903
LOC103404939	46.7305902723849	79.5313127606396	13.9298677841302	0.175149476358501	-2.5133414199425	1.64186503666817e-09	4.1679218400184e-08	Down	1.139	0.927174	0.986175	0.0842626	0.165278	0.242862	ANT	AP2-like ethylene-responsive transcription factor AIL1	GO:0003677,GO:0003700,GO:0005634,GO:0009908,GO:0010492,GO:0019760,GO:0030154,GO:0042127,GO:0043565	DNA binding|DNA-binding transcription factor activity|nucleus|flower development|maintenance of shoot apical meristem identity|glucosinolate metabolic process|cell differentiation|regulation of cell proliferation|sequence-specific DNA binding
LOC103404947	3.69705364995353	0.69063222031352	6.70347507959354	9.70628777868258	3.27891963474908	0.031615490279991	0.112292705613445	Up	0	0	0.0416143	0.0960952	0.0524255	0.196157	At2g32990	endoglucanase 11-like	GO:0005576,GO:0008810,GO:0030245,GO:0071555	extracellular region|cellulase activity|cellulose catabolic process|cell wall organization
LOC103405008	414.105978134261	555.430989472125	272.780966796398	0.491115857715547	-1.02586468819975	7.82459923074214e-06	9.79426302673638e-05	Down	35.2358	23.2957	29.458	14.8739	10.9643	10.9078	SPAC1782.12c	transmembrane protein 256 homolog	GO:0005783,GO:0005789,GO:0016021	endoplasmic reticulum|endoplasmic reticulum membrane|integral component of membrane
LOC103405011	480.106212782769	145.585474485624	814.626951079915	5.59552355039622	2.48427312462846	1.59342048133293e-06	2.34483552049958e-05	Up	6.1205	7.2757	6.70258	20.3145	39.5385	34.9605	CGR2	probable pectin methylesterase CGR2	GO:0000139,GO:0005768,GO:0005774,GO:0005794,GO:0005802,GO:0005886,GO:0008168,GO:0009535,GO:0009664,GO:0009832,GO:0009965,GO:0015976,GO:0016020,GO:0016021,GO:0045488,GO:0045489,GO:0048639,GO:0051512,GO:1903942,GO:1905157	Golgi membrane|endosome|vacuolar membrane|Golgi apparatus|trans-Golgi network|plasma membrane|methyltransferase activity|chloroplast thylakoid membrane|plant-type cell wall organization|plant-type cell wall biogenesis|leaf morphogenesis|carbon utilization|membrane|integral component of membrane|pectin metabolic process|pectin biosynthetic process|positive regulation of developmental growth|positi…
LOC103405015	94.0678804071007	59.6161929449062	128.519567869295	2.15578287577111	1.10821188132684	0.021474644413814	0.0833511770727629	Up	2.15894	1.30945	1.74439	5.11756	2.51725	2.63406	WNK11	probable serine/threonine-protein kinase WNK11	GO:0004674,GO:0005524,GO:0005737,GO:0006468,GO:0035556	protein serine/threonine kinase activity|ATP binding|cytoplasm|protein phosphorylation|intracellular signal transduction
LOC103405037	15.9434421208725	5.13029854101664	26.7565857007283	5.21540520240877	2.38277934493986	0.000278623121626665	0.00228300856301781	Up	0.0662966	0.127029	0.172288	0.702397	0.5129	0.479356	RLP47	receptor like protein 22-like	GO:0005886,GO:0016021	plasma membrane|integral component of membrane
LOC103405038	42.1383955253492	65.3623832450792	18.9144078056193	0.289377572642951	-1.78897498051802	0.00229847106437446	0.0136096152279852	Down	1.89595	0.947883	1.10563	0.593199	0.147418	0.226182	PHT4	ascorbate transporter, chloroplastic-like	GO:0005315,GO:0009507,GO:0009536,GO:0009706,GO:0009941,GO:0010028,GO:0015229,GO:0015882,GO:0016021	inorganic phosphate transmembrane transporter activity|chloroplast|plastid|chloroplast inner membrane|chloroplast envelope|xanthophyll cycle|L-ascorbic acid transmembrane transporter activity|L-ascorbic acid transmembrane transport|integral component of membrane
LOC103405048	168.206925759876	6.69999533481414	329.713856184937	49.2110575766668	5.62091061611497	1.61183792902895e-05	0.000187433540162652	Up	0.506253	0.116563	0.0340159	4.30106	7.95913	16.0795	FLA2	fasciclin-like arabinogalactan protein 2	GO:0005774,GO:0005886,GO:0016020,GO:0031225,GO:0046658	vacuolar membrane|plasma membrane|membrane|anchored component of membrane|anchored component of plasma membrane
LOC103405050	110.616822577812	149.90101559796	71.3326295576653	0.475864885058432	-1.07137609557107	0.0005334744167144	0.00396041570820755	Down	5.22903	3.90781	3.55476	1.43565	1.53377	2.49277	NUDT2	nudix hydrolase 2-like	GO:0000210,GO:0005829,GO:0006979,GO:0035529,GO:0046872,GO:0047631,GO:0051287	NAD+ diphosphatase activity|cytosol|response to oxidative stress|NADH pyrophosphatase activity|metal ion binding|ADP-ribose diphosphatase activity|NAD binding
LOC103405062	78.1276658395521	109.750704170753	46.5046275083517	0.423729650390204	-1.23878401038137	0.000699249732054802	0.00500524684747375	Down	3.36599	2.18592	2.04688	1.115	0.623399	0.931167	RBCMT	ribulose-1,5 bisphosphate carboxylase/oxygenase large subunit N-methyltransferase, chloroplastic	GO:0009507,GO:0030785	chloroplast|[ribulose-bisphosphate carboxylase]-lysine N-methyltransferase activity
LOC103405083	68.5574386707904	35.6923793435109	101.42249799807	2.84157290333487	1.5066897296178	1.79150255831353e-05	0.000206997445856952	Up	0.505042	0.384039	0.686179	2.10782	1.21204	2.12247		uncharacterized LOC103405083
LOC103405098	207.488123789905	292.716462954283	122.259784625528	0.417673073087874	-1.25955395731145	0.00156421423409882	0.00986089959623792	Down	12.4518	7.38741	9.68764	6.7808	2.47722	2.32194	LHCA3	photosystem I chlorophyll a/b-binding protein 3-1, chloroplastic	GO:0009409,GO:0009416,GO:0009507,GO:0009522,GO:0009534,GO:0009535,GO:0009579,GO:0009644,GO:0009645,GO:0009735,GO:0009768,GO:0010287,GO:0016020,GO:0016021,GO:0016168,GO:0018298,GO:0019904,GO:0046872	response to cold|response to light stimulus|chloroplast|photosystem I|chloroplast thylakoid|chloroplast thylakoid membrane|thylakoid|response to high light intensity|response to low light intensity stimulus|response to cytokinin|photosynthesis, light harvesting in photosystem I|plastoglobule|membrane|integral component of membrane|chlorophyll binding|protein-chromophore linkage|protein domain spe…	path:mdm00196	Photosynthesis - antenna proteins
LOC103405103	10.9670063311502	4.61114360540891	17.3228690568915	3.75674030983802	1.90948139102419	0.014864869121425	0.0623997329612092	Up	0.209361	0.368828	0.047443	0.899652	0.765337	0.54122	CAF1-9	probable CCR4-associated factor 1 homolog 11	GO:0000289,GO:0000932,GO:0002213,GO:0003723,GO:0004535,GO:0005634,GO:0008408,GO:0009611,GO:0017148,GO:0030015,GO:0042742,GO:0043928,GO:0046872	nuclear-transcribed mRNA poly(A) tail shortening|P-body|defense response to insect|RNA binding|poly(A)-specific ribonuclease activity|nucleus|3'-5' exonuclease activity|response to wounding|negative regulation of translation|CCR4-NOT core complex|defense response to bacterium|exonucleolytic nuclear-transcribed mRNA catabolic process involved in deadenylation-dependent decay|metal ion binding	path:mdm03018	RNA degradation
LOC103405115	75.628507848452	33.7327524805244	117.52426321638	3.48398083685084	1.80073668861637	4.46408102687056e-08	8.85788562415999e-07	Up	0.554761	0.570041	0.778506	1.69114	1.6819	1.72505	SBT3.5	subtilisin-like protease SBT3.5	GO:0004252,GO:0005576,GO:0005618,GO:0040008	serine-type endopeptidase activity|extracellular region|cell wall|regulation of growth
LOC103405117	5.11316233298193	9.87544312974062	0.350881536223235	0.0355307130640578	-4.81478954744229	0.00181475780321015	0.0112007299797876	Down	0.528924	0.793248	0.925283	0.0776083	0	0		uncharacterized LOC103405117
LOC103405124	12.3039528078549	1.94031025377672	22.6675953619331	11.6824591932201	3.54627209277128	0.000221259306528957	0.001872790451467	Up	0.0527292	0.100391	0.174705	0.742507	1.6607	0.876993	TPRP-F1	36.4 kDa proline-rich protein
LOC103405125	10.5901844038712	0	21.1803688077424	Inf	Inf	0.000282824843789587	0.00231351360650681	Up	0	0	0	0.321091	1.02874	0.366382	TPRP-F1	36.4 kDa proline-rich protein-like
LOC103405138	2.67442869815601	5.34885739631202	0	0	-Inf	0.0164804864269906	0.06759610943951	Down	0.144638	0.140782	0.136842	0	0	0		protein IQ-DOMAIN 14-like
LOC103405142	623.33711102206	889.097163400265	357.577058643855	0.402179956661133	-1.31408691067355	0.00351957659248654	0.0194310655905894	Down	41.1935	23.7319	31.1613	20.0525	5.61152	8.87257	PSBP	oxygen-evolving enhancer protein 2, chloroplastic-like	GO:0005509,GO:0009535,GO:0009654,GO:0015979,GO:0019898	calcium ion binding|chloroplast thylakoid membrane|photosystem II oxygen evolving complex|photosynthesis|extrinsic component of membrane	path:mdm00195	Photosynthesis
LOC103405149	41.7961804644476	65.0689194936896	18.5234414352055	0.284674182072471	-1.81261643807343	1.25916644635215e-05	0.000149664761294583	Down	1.83397	2.28775	1.8734	0.357426	0.329695	0.700128	At2g35010	thioredoxin O2, mitochondrial-like	GO:0005739,GO:0005759,GO:0006662,GO:0015035,GO:0016671,GO:0045454	mitochondrion|mitochondrial matrix|glycerol ether metabolic process|protein disulfide oxidoreductase activity|oxidoreductase activity, acting on a sulfur group of donors, disulfide as acceptor|cell redox homeostasis
LOC103405167	31.1648303225479	55.9770671017254	6.3525935433703	0.113485644609174	-3.13941827984682	1.22093713580486e-09	3.17159207589452e-08	Down	1.23048	0.819513	0.913066	0.0359138	0.0484504	0.198321		uncharacterized LOC103405167
LOC103405169	6.70122805028216	2.50901437153132	10.893441729033	4.34172153521163	2.11826719885675	0.0389217359266658	0.132186167351692	Up	0.139193	0	0.0519854	0.167069	0.151431	0.410178	DTX56	protein DETOXIFICATION 56	GO:0005886,GO:0006855,GO:0015238,GO:0015297,GO:0016021,GO:0071244,GO:1902456	plasma membrane|drug transmembrane transport|drug transmembrane transporter activity|antiporter activity|integral component of membrane|cellular response to carbon dioxide|regulation of stomatal opening
LOC103405186	30.1083470139277	1.25450718576566	58.9621868420897	47.0002782854555	5.55459739380228	7.52307155222959e-17	4.7827597434021e-15	Up	0.0596685	3.92842e-08	5.95043e-08	1.00041	0.697607	1.14827	sfc4	general transcription factor 3C polypeptide 3-like	GO:0000127,GO:0000995,GO:0001004,GO:0003677,GO:0005634,GO:0005829,GO:0006383,GO:0006384	transcription factor TFIIIC complex|RNA polymerase III general transcription initiation factor activity|RNA polymerase III transcription regulator recruiting activity|DNA binding|nucleus|cytosol|transcription by RNA polymerase III|transcription initiation from RNA polymerase III promoter
LOC103405187	104.803870001748	155.231235983436	54.3765040200599	0.350293571236282	-1.51336358356909	0.000454144223160079	0.00345645603292483	Down	4.89243	3.52243	5.81461	2.47118	0.609697	1.50017	COL5	zinc finger protein CONSTANS-LIKE 5-like	GO:0003700,GO:0005634,GO:0006355,GO:0008270,GO:0009909	DNA-binding transcription factor activity|nucleus|regulation of transcription, DNA-templated|zinc ion binding|regulation of flower development
LOC103405188	303.217987850059	160.092587782418	446.343387917701	2.78803281338875	1.47924754091747	2.9557015827737e-06	4.08027566117188e-05	Up	3.67568	3.47248	3.59025	7.9229	7.1478	11.6005	GAUT15	probable galacturonosyltransferase 15	GO:0000139,GO:0016021,GO:0045489,GO:0047262,GO:0071555	Golgi membrane|integral component of membrane|pectin biosynthetic process|polygalacturonate 4-alpha-galacturonosyltransferase activity|cell wall organization
LOC103405189	4.29473581005593	0.951443493896027	7.63802812621584	8.02783157929768	3.0050103498519	0.0296666829561842	0.106903311236766	Up	0.0380724	0	0	0.274489	0.0712835	0.240933	AGL1	agamous-like MADS-box protein AGL1	GO:0000977,GO:0000982,GO:0005634,GO:0007275,GO:0008134,GO:0040008,GO:0043565,GO:0044212,GO:0045944,GO:0046983,GO:0048481	RNA polymerase II regulatory region sequence-specific DNA binding|transcription factor activity, RNA polymerase II proximal promoter sequence-specific DNA binding|nucleus|multicellular organism development|transcription factor binding|regulation of growth|sequence-specific DNA binding|transcription regulatory region DNA binding|positive regulation of transcription by RNA polymerase II|protein dim…
LOC103405207	952.505101101786	1776.32408515916	128.686117044409	0.0724451794126734	-3.78696649542123	2.71375594152177e-05	0.00029958790839572	Down	17.9432	50.3633	29.2459	2.43988	2.69048	1.01443	PGDH2	D-3-phosphoglycerate dehydrogenase 2, chloroplastic-like	GO:0004617,GO:0005634,GO:0005829,GO:0006564,GO:0009507,GO:0009570,GO:0051287	phosphoglycerate dehydrogenase activity|nucleus|cytosol|L-serine biosynthetic process|chloroplast|chloroplast stroma|NAD binding	path:mdm00260,path:mdm00270	Glycine, serine and threonine metabolism|Cysteine and methionine metabolism
LOC103405225	18.0738388322953	28.0796798040326	8.06799786055804	0.287325137496738	-1.79924387801612	0.0413001355384859	0.13828032900824	Down	1.23201	0.349129	0.844217	0.490025	0.0519977	0.116135	GLCAT14A	beta-glucuronosyltransferase GlcAT14C-like	GO:0000139,GO:0005794,GO:0008375,GO:0009826,GO:0015020,GO:0016021	Golgi membrane|Golgi apparatus|acetylglucosaminyltransferase activity|unidimensional cell growth|glucuronosyltransferase activity|integral component of membrane
LOC103405234	70.4381581599988	95.8301948355822	45.0461214844154	0.470061879365913	-1.08907740793095	0.00112912535084872	0.00752006180706096	Down	1.14159	0.577112	0.945864	0.43654	0.351312	0.304967	ABCB19	ABC transporter B family member 19-like	GO:0005524,GO:0005886,GO:0008361,GO:0009637,GO:0009639,GO:0009640,GO:0009733,GO:0009734,GO:0009926,GO:0009958,GO:0010218,GO:0010329,GO:0010540,GO:0010541,GO:0016021,GO:0042626,GO:0043481,GO:0048364,GO:0048443,GO:0048527,GO:0060918,GO:0090691	ATP binding|plasma membrane|regulation of cell size|response to blue light|response to red or far red light|photomorphogenesis|response to auxin|auxin-activated signaling pathway|auxin polar transport|positive gravitropism|response to far red light|auxin efflux transmembrane transporter activity|basipetal auxin transport|acropetal auxin transport|integral component of membrane|ATPase activity, co…	path:mdm02010	ABC transporters
LOC103405246	175.868422571846	243.223241579509	108.513603564184	0.446148167664774	-1.16440518013227	3.56631699324384e-06	4.82668205574878e-05	Down	2.34189	1.7652	2.07359	0.78943	0.641351	1.05486		uncharacterized LOC103405246
LOC103405253	5043.33764289071	3039.39752978217	7047.27775599924	2.31864298333634	1.21328069586913	5.60871672645056e-06	7.2652680026721e-05	Up	172.907	141.426	198.931	350.263	417.663	277.426	RBX1A	RING-box protein 1a	GO:0005634,GO:0005737,GO:0006511,GO:0008270,GO:0019788,GO:0031146,GO:0031461,GO:0031462,GO:0031463,GO:0031467,GO:0043224,GO:0045116,GO:0061630,GO:0080008,GO:0097602	nucleus|cytoplasm|ubiquitin-dependent protein catabolic process|zinc ion binding|NEDD8 transferase activity|SCF-dependent proteasomal ubiquitin-dependent protein catabolic process|cullin-RING ubiquitin ligase complex|Cul2-RING ubiquitin ligase complex|Cul3-RING ubiquitin ligase complex|Cul7-RING ubiquitin ligase complex|nuclear SCF ubiquitin ligase complex|protein neddylation|ubiquitin protein li…	path:mdm03420,path:mdm04120,path:mdm04141	Nucleotide excision repair|Ubiquitin mediated proteolysis|Protein processing in endoplasmic reticulum
LOC103405270	14.2999475780307	5.77867834304303	22.8212168130183	3.94921043502842	1.98156424434504	0.0030930505418349	0.0174620321728907	Up	0.159549	0.230355	0.357598	0.822251	1.04718	0.758091	VQ22	VQ motif-containing protein 22	GO:0005634	nucleus
LOC103405282	7.96471010163677	15.9294202032735	0	0	-Inf	3.20624498894099e-06	4.38645786830577e-05	Down	0.354328	0.180557	0.378784	0	0	0	WAKL22	wall-associated receptor kinase-like 8
LOC103405286	36.631496470035	63.2650778347852	9.9979151052847	0.158032131587571	-2.66171017338946	1.13125538200055e-08	2.47510139805251e-07	Down	1.52153	1.90859	1.4302	0.114131	0.312252	0.263038	PSY	phytoene synthase 2, chloroplastic-like	GO:0004310,GO:0006696,GO:0009507,GO:0016117,GO:0016767,GO:0051996	farnesyl-diphosphate farnesyltransferase activity|ergosterol biosynthetic process|chloroplast|carotenoid biosynthetic process|geranylgeranyl-diphosphate geranylgeranyltransferase activity|squalene synthase activity	path:mdm00906	Carotenoid biosynthesis
LOC103405309	81.2225300900658	111.235519551415	51.2095406287171	0.460370399987634	-1.11913301807201	0.000437937932370973	0.00336313130051245	Down	1.38896	1.57737	1.65276	0.45251	0.594222	0.803247	pab2	uncharacterized LOC103405309	GO:0000790,GO:0005634,GO:0005654,GO:0005730,GO:0005737,GO:0005844,GO:0006402,GO:0008143,GO:0016604,GO:1990251	nuclear chromatin|nucleus|nucleoplasm|nucleolus|cytoplasm|polysome|mRNA catabolic process|poly(A) binding|nuclear body|Mmi1 nuclear focus
LOC103405311	4.24308052914403	0.949028917744796	7.53713214054326	7.94194149368384	2.98949173292444	0.0302847907579806	0.108617602879359	Up	0.011046	0.0106878	0.0124486	0.057356	0.103895	0.0348336	ACA9	calcium-transporting ATPase 9, plasma membrane-type	GO:0005388,GO:0005516,GO:0005524,GO:0005886,GO:0005887,GO:0007338,GO:0009555,GO:0046872	calcium-transporting ATPase activity|calmodulin binding|ATP binding|plasma membrane|integral component of plasma membrane|single fertilization|pollen development|metal ion binding
LOC103405323	68.5620538527256	38.0820392948527	99.0420684105984	2.60075537561837	1.37893070724734	0.00092677000838646	0.00634405254855336	Up	2.15109	0.837172	0.676412	3.48608	3.21766	2.15841		uncharacterized LOC103405323
LOC103405327	18.1798738518368	34.9825842914869	1.37716341218662	0.0393671148109476	-4.66686520754106	0.0175931876258399	0.0711532518517158	Down	0.247439	1.71714	0.506046	0.0234013	0.0423916	0.0237212	MYC3	transcription factor MYC2-like	GO:0003677,GO:0003700,GO:0005634,GO:0006355,GO:0006952,GO:0009718,GO:0009753,GO:0043425,GO:0045893,GO:0046983	DNA binding|DNA-binding transcription factor activity|nucleus|regulation of transcription, DNA-templated|defense response|anthocyanin-containing compound biosynthetic process|response to jasmonic acid|bHLH transcription factor binding|positive regulation of transcription, DNA-templated|protein dimerization activity
LOC103405345	71.1212117453028	134.20306583533	8.03935765527537	0.0599044262158646	-4.06119358502845	7.62788929458633e-16	4.37020772035687e-14	Down	1.26667	0.749297	1.1594	0.0702333	0.0158512	0.0796842	XI-B	myosin-8	GO:0003774,GO:0005516,GO:0005524,GO:0005737,GO:0007015,GO:0016459,GO:0030048,GO:0051015	motor activity|calmodulin binding|ATP binding|cytoplasm|actin filament organization|myosin complex|actin filament-based movement|actin filament binding
LOC103405374	149.749627496904	218.637717636208	80.8615373575989	0.3698425790016	-1.43501676690494	8.12683064712757e-08	1.52850554558393e-06	Down	3.52935	2.72811	3.74811	1.07187	1.21049	0.77196		uncharacterized LOC103405374
LOC103405387	111.190881430831	70.9960862769551	151.385676584707	2.13231016698797	1.09241730856085	0.00011848156197748	0.00108971461983729	Up	2.06139	2.05803	2.48893	3.8574	4.22373	4.26993	ARP7	actin-related protein 7	GO:0005200,GO:0005634,GO:0005737,GO:0006325,GO:0009653,GO:0009793,GO:0010227	structural constituent of cytoskeleton|nucleus|cytoplasm|chromatin organization|anatomical structure morphogenesis|embryo development ending in seed dormancy|floral organ abscission
LOC103405388	13.1894646377096	19.8004354416281	6.57849383379099	0.332239856703377	-1.58970294025308	0.0231767829312863	0.0884188626369245	Down	0.363472	0.284272	0.350458	0.144589	0.0649923	0.0728613		uncharacterized LOC103405388
LOC103405408	6.63077511452625	12.9278642692041	0.333685959848413	0.0258113755605632	-5.27584916103087	0.0474958963046492	0.153981887035538	Down	0.575792	0.103465	0.121091	0	0	0		uncharacterized LOC103405408
LOC103405428	3.12019059208214	0.34531611015676	5.89506507400752	17.0715031839418	4.09351819136309	0.0259388444268067	0.0964802540329902	Up	0	0	0.0246984	0.181114	0.0617882	0.0462033	ITN1	ankyrin repeat-containing protein At5g02620-like	GO:0005634,GO:0005886,GO:0009651,GO:0016020,GO:0016021,GO:0034613	nucleus|plasma membrane|response to salt stress|membrane|integral component of membrane|cellular protein localization
LOC103405432	1663.21114122279	1048.24097653275	2278.18130591284	2.17333738798148	1.11991215527599	1.47621486442063e-05	0.000173675030654574	Up	10.2858	13.2819	11.0372	17.349	23.5673	26.5979		myb-like protein X
LOC103405441	28.9684740982855	39.754082404969	18.182865791602	0.457383611735161	-1.12852342063752	0.0203959056717751	0.079977993429563	Down	1.20987	0.629316	1.49664	0.458046	0.333643	0.561687	BHLH68	transcription factor bHLH68-like	GO:0001228,GO:0003677,GO:0003700,GO:0005634,GO:0006355,GO:0046983	DNA-binding transcription activator activity, RNA polymerase II-specific|DNA binding|DNA-binding transcription factor activity|nucleus|regulation of transcription, DNA-templated|protein dimerization activity
LOC103405453	59.3084511644524	88.2150753912338	30.401826937671	0.344633009753026	-1.53686720201226	1.68999089262727e-05	0.00019573646015687	Down	5.20919	5.02133	5.19771	2.43378	0.908325	1.32351	PSAH2	photosystem I reaction center subunit VI-2, chloroplastic-like	GO:0009507,GO:0009534,GO:0009535,GO:0009538,GO:0009579,GO:0009735,GO:0010287,GO:0015979,GO:0016020,GO:0016021	chloroplast|chloroplast thylakoid|chloroplast thylakoid membrane|photosystem I reaction center|thylakoid|response to cytokinin|plastoglobule|photosynthesis|membrane|integral component of membrane	path:mdm00195	Photosynthesis
LOC103405459	51.2180996192818	31.5667457138107	70.8694535247528	2.24506682339912	1.16675838677122	0.0211000670756305	0.0822054756783402	Up	2.61628	2.612	1.85026	3.98779	7.23787	3.86034	dlc2	dynein light chain 1, cytoplasmic-like	GO:0000743,GO:0003774,GO:0005634,GO:0005829,GO:0005868,GO:0005874,GO:0030286,GO:0030437,GO:0030989,GO:0034399,GO:0035974,GO:0045505,GO:0051959,GO:2000582	nuclear migration involved in conjugation with cellular fusion|motor activity|nucleus|cytosol|cytoplasmic dynein complex|microtubule|dynein complex|ascospore formation|dynein-driven meiotic oscillatory nuclear movement|nuclear periphery|meiotic spindle pole body|dynein intermediate chain binding|dynein light intermediate chain binding|positive regulation of ATP-dependent microtubule motor activit…
LOC103405468	254.84570890976	144.986230239933	364.705187579587	2.5154470667735	1.3308148309246	0.0045569537787581	0.0241069507383572	Up	6.63312	3.01287	7.75987	16.2724	7.64474	15.7544		uncharacterized LOC103405468
LOC103405483	56.0524373087665	82.6054067213392	29.4994678961937	0.357113039776041	-1.48554728082683	5.06259585173239e-05	0.000522108337750701	Down	0.912884	0.877305	0.894858	0.261837	0.224435	0.290698	RTEL1	regulator of telomere elongation helicase 1 homolog	GO:0000723,GO:0000725,GO:0003677,GO:0004003,GO:0005524,GO:0005634,GO:0005739,GO:0006260,GO:0006281,GO:0006310,GO:0006355,GO:0009555,GO:0010569,GO:0032508,GO:0036297,GO:0043007,GO:0045910,GO:0046872,GO:0048364,GO:0051539,GO:0070182,GO:0070716,GO:0090657,GO:1904430	telomere maintenance|recombinational repair|DNA binding|ATP-dependent DNA helicase activity|ATP binding|nucleus|mitochondrion|DNA replication|DNA repair|DNA recombination|regulation of transcription, DNA-templated|pollen development|regulation of double-strand break repair via homologous recombination|DNA duplex unwinding|interstrand cross-link repair|maintenance of rDNA|negative regulation of DN…
LOC103405496	80.1111475382373	123.644281920417	36.5780131560576	0.295832630413114	-1.75714690404993	9.97432403094857e-08	1.84292959628553e-06	Down	4.49398	4.24912	4.52102	0.721837	2.25777	0.779595	At3g50280	uncharacterized acetyltransferase At3g50280-like	GO:0016747	transferase activity, transferring acyl groups other than amino-acyl groups
LOC103405497	13.6248621920503	0	27.2497243841005	Inf	Inf	4.57134906865482e-09	1.07480461881836e-07	Up	0	0	0	0.486925	1.13395	0.780915	At1g15670	F-box/kelch-repeat protein At1g15670	GO:0005829,GO:0080037,GO:2000762	cytosol|negative regulation of cytokinin-activated signaling pathway|regulation of phenylpropanoid metabolic process
LOC103405517	51.7394943100611	82.477545584855	21.0014430352673	0.254632250345769	-1.97351294011263	3.32785615824815e-07	5.62533819402997e-06	Down	0.979603	1.36266	0.84352	0.276115	0.35938	0.1702	CENPC	centromere protein C	GO:0000775,GO:0000776,GO:0000778,GO:0005634,GO:0019237,GO:0051301,GO:0051315,GO:0051382,GO:0051455	chromosome, centromeric region|kinetochore|condensed nuclear chromosome kinetochore|nucleus|centromeric DNA binding|cell division|attachment of mitotic spindle microtubules to kinetochore|kinetochore assembly|attachment of spindle microtubules to kinetochore involved in homologous chromosome segregation
LOC103405529	704.166395657037	462.284316774462	946.048474539612	2.04646456782389	1.03313368839483	0.000382956347165183	0.00298697053791094	Up	6.23019	5.38666	7.22403	8.84943	12.0275	14.4951	TBL43	protein trichome birefringence-like 43	GO:0005794,GO:0016021,GO:0016413	Golgi apparatus|integral component of membrane|O-acetyltransferase activity
LOC103405563	556.018965039152	174.1337091969	937.904220881403	5.38611521690425	2.42924509153258	3.17943590763971e-29	5.12065816458195e-27	Up	4.69651	5.01169	4.27116	17.2043	17.0029	16.9931	PGAAIR	ketol-acid reductoisomerase, chloroplastic	GO:0004455,GO:0009097,GO:0009099,GO:0009507,GO:0046872	ketol-acid reductoisomerase activity|isoleucine biosynthetic process|valine biosynthetic process|chloroplast|metal ion binding	path:mdm00290,path:mdm00770	Valine, leucine and isoleucine biosynthesis|Pantothenate and CoA biosynthesis
LOC103405565	1630.86946827152	1014.32382985345	2247.41510668959	2.21567811042584	1.14774830457145	9.68979243943679e-07	1.49817110836945e-05	Up	7.04188	10.1493	7.37325	13.5404	18.5837	17.2578		myb-like protein X
LOC103405578	86.4153411422072	145.84008754825	26.9905947361639	0.185069792468646	-2.43385866057636	3.67696547653191e-07	6.15090762635084e-06	Down	1.65321	2.82458	2.82585	0.305138	0.697858	0.195008	At1g80870	putative receptor-like protein kinase At1g80870	GO:0004675,GO:0005524,GO:0005886,GO:0006468,GO:0016021	transmembrane receptor protein serine/threonine kinase activity|ATP binding|plasma membrane|protein phosphorylation|integral component of membrane
LOC103405581	249.336441057908	163.663951715865	335.00893039995	2.04693169685622	1.03346296252211	7.64193362560452e-06	9.58631137197209e-05	Up	2.44636	1.9533	2.70416	4.72425	3.74814	4.02405	At1g61180	probable disease resistance protein At5g63020
LOC103405584	137.380209581329	251.605516389792	23.1549027728667	0.0920285974056098	-3.44177394899267	2.69015232059386e-25	3.36153085232828e-23	Down	12.2038	11.0971	8.1169	0.797373	0.710248	0.701906	ATJ8	chaperone protein dnaJ 8, chloroplastic	GO:0005634,GO:0009416,GO:0009507,GO:0009570	nucleus|response to light stimulus|chloroplast|chloroplast stroma
LOC103405608	23.9296509050544	41.2899751326493	6.56932667745949	0.1591022192761	-2.65197413529449	2.75381431456725e-06	3.8326009111524e-05	Down	0.746877	0.587634	0.559631	0.0288463	0.0259654	0.0579269		E3 ubiquitin-protein ligase FANCL			path:mdm04120	Ubiquitin mediated proteolysis
LOC103405620	70.3424119272191	98.6555981101427	42.0292257442954	0.426019673991257	-1.23100803787705	0.000223654092621027	0.00188974996942104	Down	0.80726	1.0278	0.945504	0.310378	0.336125	0.375069	HIT4	protein HEAT INTOLERANT 4-like	GO:0005730,GO:0009408,GO:0010286,GO:0010369,GO:0060969,GO:1900034,GO:1901651	nucleolus|response to heat|heat acclimation|chromocenter|negative regulation of gene silencing|regulation of cellular response to heat|regulation of mitotic chromosome decondensation
LOC103405636	580.045417649918	880.595502197479	279.495333102358	0.317393550619884	-1.65565528172133	3.7286775264431e-15	2.00174743502936e-13	Down	31.0077	24.7988	28.0738	6.82685	11.3833	5.87693	TAT	tyrosine aminotransferase-like	GO:0004838,GO:0005829,GO:0006520,GO:0006559,GO:0006572,GO:0009058,GO:0030170	L-tyrosine:2-oxoglutarate aminotransferase activity|cytosol|cellular amino acid metabolic process|L-phenylalanine catabolic process|tyrosine catabolic process|biosynthetic process|pyridoxal phosphate binding	path:mdm00130,path:mdm00270,path:mdm00350,path:mdm00360,path:mdm00400,path:mdm00950,path:mdm00960	Ubiquinone and other terpenoid-quinone biosynthesis|Cysteine and methionine metabolism|Tyrosine metabolism|Phenylalanine metabolism|Phenylalanine, tyrosine and tryptophan biosynthesis|Isoquinoline alkaloid biosynthesis|Tropane, piperidine and pyridine alkaloid biosynthesis
LOC103405643	18.2672883832553	3.05840188007608	33.4761748864345	10.9456429204137	3.45228479228893	0.00179523160946949	0.0111062237214086	Up	0.0665171	0.127674	0.0249213	0.275092	0.733208	1.14674	TZF4	zinc finger CCCH domain-containing protein 2-like	GO:0003677,GO:0003700,GO:0003727,GO:0005634,GO:0006355,GO:0010187,GO:0046872	DNA binding|DNA-binding transcription factor activity|single-stranded RNA binding|nucleus|regulation of transcription, DNA-templated|negative regulation of seed germination|metal ion binding
LOC103405649	1382.60634668312	1918.00378779764	847.208905568609	0.441713885529613	-1.17881590984948	5.45458916076885e-08	1.06699419548373e-06	Down	62.9637	74.1576	84.3251	38.1155	22.6738	25.3265	AAC3	ADP,ATP carrier protein 3, mitochondrial	GO:0005471,GO:0005739,GO:0005743,GO:0009941,GO:0015865,GO:0016020,GO:0016021	ATP:ADP antiporter activity|mitochondrion|mitochondrial inner membrane|chloroplast envelope|purine nucleotide transport|membrane|integral component of membrane
LOC103405654	71.2840911044654	139.453806692003	3.11437551692797	0.0223326676467597	-5.48470059777765	2.50989982335808e-06	3.51847175431096e-05	Down	1.53868	4.81123	5.79548	0.117636	0.053289	0.0297189	WSD1	O-acyltransferase WSD1-like	GO:0004144,GO:0005783,GO:0005789,GO:0005886,GO:0010025,GO:0016021,GO:0019432,GO:0047196,GO:0102966,GO:0103095	diacylglycerol O-acyltransferase activity|endoplasmic reticulum|endoplasmic reticulum membrane|plasma membrane|wax biosynthetic process|integral component of membrane|triglyceride biosynthetic process|long-chain-alcohol O-fatty-acyltransferase activity|arachidoyl-CoA:1-dodecanol O-acyltransferase activity|wax ester synthase activity
LOC103405670	612.431796584369	376.877222132574	847.986371036165	2.25003348899093	1.16994647434968	1.16276611604028e-08	2.53829741747045e-07	Up	7.66463	8.65369	7.202	14.3805	16.2848	18.3196	TOM2AH3	tetraspanin-19-like	GO:0005774,GO:0016021	vacuolar membrane|integral component of membrane
LOC103405673	3.2945762011585	0.303063691869633	6.28608871044737	20.7418073463957	4.37446970437497	0.0199611965285992	0.0787205941183635	Up	0.028598	0	0	0.089521	0.134719	0.210199	At3g47200	UPF0481 protein At3g47200-like	GO:0005886,GO:0016021	plasma membrane|integral component of membrane
LOC103405696	143.49116165805	285.622355480287	1.35996783581179	0.00476141943975269	-7.71439256125044	8.07924414243637e-09	1.80444751686618e-07	Down	11.4027	4.86502	4.69151	0	0.0659471	0.0245899	RD21B	probable cysteine protease RD21B	GO:0004197,GO:0005615,GO:0005764,GO:0005773,GO:0005783,GO:0005829,GO:0009651,GO:0051603	cysteine-type endopeptidase activity|extracellular space|lysosome|vacuole|endoplasmic reticulum|cytosol|response to salt stress|proteolysis involved in cellular protein catabolic process
LOC103405700	107.945733648646	44.2977823130805	171.593684984212	3.87364053061283	1.95369007971183	5.8085845171793e-11	1.83832822219463e-09	Up	3.63857	1.80557	1.70694	7.11381	8.90546	7.94811	At5g15350	lamin-like protein	GO:0005773,GO:0005886,GO:0009055,GO:0031225,GO:0046658	vacuole|plasma membrane|electron transfer activity|anchored component of membrane|anchored component of plasma membrane
LOC103405712	17.7294168665664	34.4233847008379	1.03544903229488	0.0300798146752164	-5.05506051132201	8.52495213082047e-10	2.2652462169797e-08	Down	1.24447	1.73154	2.26165	0.152133	0.0837034	0.125531	DRB1	double-stranded RNA-binding protein 1-like	GO:0003723	RNA binding
LOC103405722	243.071976059296	354.359551367098	131.784400751494	0.371894591928106	-1.42703432638148	2.06597064004983e-09	5.16314559095212e-08	Down	3.07332	3.39777	3.94751	0.943422	1.143	1.35488	SMC4	structural maintenance of chromosomes protein 4	GO:0000070,GO:0005524,GO:0005634,GO:0005694,GO:0007076,GO:0009793,GO:0051301,GO:0051321	mitotic sister chromatid segregation|ATP binding|nucleus|chromosome|mitotic chromosome condensation|embryo development ending in seed dormancy|cell division|meiotic cell cycle
LOC103405735	87.0768134336147	117.772592024505	56.3810348427245	0.478727977991631	-1.06272197186649	0.000566547577919954	0.00417918938521615	Down	2.76185	3.59053	3.25727	1.31908	1.41967	1.42951		uncharacterized LOC103405735
LOC103405750	5.52890187655121	10.0143263007642	1.0434774523382	0.104198467375541	-3.26259403728982	0.00853407606895794	0.0400782221349572	Down	0.168903	0.162959	0.147451	0.019514	0.0176007	0.0196745		uncharacterized LOC103405750
LOC103405759	58.6847297313192	91.521064075826	25.8483953868123	0.282431106410615	-1.82402910191245	4.91934317501301e-07	8.05716150528967e-06	Down	0.771907	0.514997	0.601411	0.0171381	0.038686	0.103756	TL1	PR5-like receptor kinase	GO:0005576	extracellular region
LOC103405764	20.5311847144172	35.5778010402178	5.4845683886165	0.154157036923576	-2.69752734814074	0.000288160948699018	0.002347260262031	Down	2.44191	1.24699	1.15099	0.319959	0.34006	0.0476908		cucumber peeling cupredoxin-like
LOC103405784	422.512221203825	638.00299509572	207.02144731193	0.324483503844476	-1.62378295880996	6.40454940063897e-14	2.92851556978744e-12	Down	16.5061	18.2899	15.4816	4.64221	5.01374	5.25212	CYP704C1	cytochrome P450 704C1-like	GO:0004497,GO:0005506,GO:0016021,GO:0016705,GO:0020037	monooxygenase activity|iron ion binding|integral component of membrane|oxidoreductase activity, acting on paired donors, with incorporation or reduction of molecular oxygen|heme binding
LOC103405785	109.291989736199	1.51290388319694	217.071075589201	143.479753076254	7.16470335735613	3.77101198505569e-33	7.86486600336435e-31	Up	0.229104	0.0546038	0	8.10247	11.9207	8.19794	Os03g0767500	thioredoxin-like protein HCF164, chloroplastic	GO:0006662,GO:0009507,GO:0009535,GO:0010190,GO:0015035,GO:0016671,GO:0045454	glycerol ether metabolic process|chloroplast|chloroplast thylakoid membrane|cytochrome b6f complex assembly|protein disulfide oxidoreductase activity|oxidoreductase activity, acting on a sulfur group of donors, disulfide as acceptor|cell redox homeostasis
LOC103405794	15.0410800546098	28.3369195844349	1.74524052478467	0.0615889288736703	-4.02118515207761	3.59878985600804e-07	6.03755312069868e-06	Down	0.538163	0.523148	0.357566	0.0331418	0.0149323	0.0167288	PMI15	protein PLASTID MOVEMENT IMPAIRED 2-like	GO:0005829,GO:0009637,GO:0009903,GO:0009904	cytosol|response to blue light|chloroplast avoidance movement|chloroplast accumulation movement
LOC103405807	3.71520618092875	7.4304123618575	0	0	-Inf	0.00318157982975834	0.0178782708402199	Down	0.149441	0.0321156	0.205451	0	0	0	RPS5	probable disease resistance protein At5g63020			path:mdm04626	Plant-pathogen interaction
LOC103405824	453.559616121298	247.890111263145	659.229120979452	2.65936030130567	1.41107925282275	4.45391256577324e-11	1.42672845615211e-09	Up	4.84964	9.13903	6.06985	15.4269	15.4817	16.7178	CYP71A4	cytochrome P450 71A4-like	GO:0004497,GO:0005506,GO:0016021,GO:0016705,GO:0020037	monooxygenase activity|iron ion binding|integral component of membrane|oxidoreductase activity, acting on paired donors, with incorporation or reduction of molecular oxygen|heme binding
LOC103405827	537.444799598997	302.594777459487	772.294821738507	2.55224108037326	1.35176461007139	6.45140456640587e-08	1.24104988971537e-06	Up	7.58287	7.39707	12.1813	19.0089	18.3108	25.5987	FLA8	fasciclin-like arabinogalactan protein 8	GO:0005886,GO:0009505,GO:0031225,GO:0046658,GO:0048046	plasma membrane|plant-type cell wall|anchored component of membrane|anchored component of plasma membrane|apoplast
LOC103405828	44.1909378227499	77.4448756073856	10.9370000381141	0.141223030605154	-2.82395271286153	8.14638546407892e-11	2.51505553358517e-09	Down	2.17802	1.97166	2.16347	0.381028	0.124942	0.559798	MMD1	PHD finger protein MALE MEIOCYTE DEATH 1-like	GO:0000212,GO:0003677,GO:0005634,GO:0005719,GO:0006355,GO:0007060,GO:0010032,GO:0033613,GO:0042393,GO:0043565,GO:0046872,GO:0048235,GO:0051321,GO:1990188	meiotic spindle organization|DNA binding|nucleus|nuclear euchromatin|regulation of transcription, DNA-templated|male meiosis chromosome segregation|meiotic chromosome condensation|activating transcription factor binding|histone binding|sequence-specific DNA binding|metal ion binding|pollen sperm cell differentiation|meiotic cell cycle|euchromatin binding
LOC103405834	80.4417459937591	107.412843542772	53.4706484447464	0.497804980122832	-1.00634743153793	0.0128230663953177	0.0554092554479444	Down	1.63178	2.13181	2.45511	1.29214	0.30719	1.17208	KAN1	transcription repressor KAN1-like	GO:0003700,GO:0005634,GO:0006355,GO:0009943,GO:0009944,GO:0009956,GO:0010051,GO:0010158,GO:0044212,GO:0048440,GO:0048481,GO:1905392	DNA-binding transcription factor activity|nucleus|regulation of transcription, DNA-templated|adaxial/abaxial axis specification|polarity specification of adaxial/abaxial axis|radial pattern formation|xylem and phloem pattern formation|abaxial cell fate specification|transcription regulatory region DNA binding|carpel development|plant ovule development|plant organ morphogenesis
LOC103405839	776.687365928119	286.288497083058	1267.08623477318	4.42590690049825	2.1459731041886	3.28199015876957e-07	5.5640289299842e-06	Up	4.14237	5.26961	3.73902	15.8754	13.271	23.1523	TMK1	receptor protein kinase TMK1-like
LOC103405851	148.267598902839	250.822923462826	45.7122743428524	0.182249188837109	-2.45601570153287	1.25878923832477e-18	9.33306905857675e-17	Down	8.05858	7.60276	6.48871	1.70905	0.776565	1.12884	DJC76	chaperone protein dnaJ C76, chloroplastic	GO:0009507	chloroplast
LOC103405853	123.904245781169	231.360560402901	16.447931159437	0.0710921996851747	-3.81416491534305	1.01401312657323e-31	1.99974425437809e-29	Down	9.5996	9.81941	7.97355	0.775535	0.283673	0.635451	PNSB2	photosynthetic NDH subunit of subcomplex B 2, chloroplastic	GO:0003824,GO:0005975,GO:0009534,GO:0009535,GO:0009773,GO:0010598,GO:0030246	catalytic activity|carbohydrate metabolic process|chloroplast thylakoid|chloroplast thylakoid membrane|photosynthetic electron transport in photosystem I|NAD(P)H dehydrogenase complex (plastoquinone)|carbohydrate binding
LOC103405859	263.116746000894	27.4229523919296	498.810539609859	18.189527242758	4.18503614181344	1.30716372212983e-06	1.95333383013112e-05	Up	0.874155	0.890478	0.364287	11.1799	16.3587	6.21983	ASP1	aspartate aminotransferase, mitochondrial	GO:0004069,GO:0005507,GO:0005739,GO:0005759,GO:0006103,GO:0006531,GO:0006536,GO:0009058,GO:0030170,GO:0046686	L-aspartate:2-oxoglutarate aminotransferase activity|copper ion binding|mitochondrion|mitochondrial matrix|2-oxoglutarate metabolic process|aspartate metabolic process|glutamate metabolic process|biosynthetic process|pyridoxal phosphate binding|response to cadmium ion	path:mdm00220,path:mdm00250,path:mdm00270,path:mdm00330,path:mdm00350,path:mdm00360,path:mdm00400,path:mdm00710,path:mdm00950,path:mdm00960	Arginine biosynthesis|Alanine, aspartate and glutamate metabolism|Cysteine and methionine metabolism|Arginine and proline metabolism|Tyrosine metabolism|Phenylalanine metabolism|Phenylalanine, tyrosine and tryptophan biosynthesis|Carbon fixation in photosynthetic organisms|Isoquinoline alkaloid biosynthesis|Tropane, piperidine and pyridine alkaloid biosynthesis
LOC103405870	733.870215282966	981.212504526354	486.527926039579	0.495843585151244	-1.01204300353965	3.83715812604521e-07	6.38938621907241e-06	Down	12.933	12.5793	11.4801	4.90501	5.54839	6.22826	EDR1	serine/threonine-protein kinase EDR1-like	GO:0000165,GO:0002229,GO:0004709,GO:0004712,GO:0005524,GO:0005634,GO:0005768,GO:0005769,GO:0005783,GO:0005802,GO:0005829,GO:0005886,GO:0008219,GO:0009414,GO:0009617,GO:0009620,GO:0009723,GO:0009738,GO:0009788,GO:0009873,GO:0012510,GO:0016301,GO:0046777,GO:1900150,GO:1900424,GO:2000031	MAPK cascade|defense response to oomycetes|MAP kinase kinase kinase activity|protein serine/threonine/tyrosine kinase activity|ATP binding|nucleus|endosome|early endosome|endoplasmic reticulum|trans-Golgi network|cytosol|plasma membrane|cell death|response to water deprivation|response to bacterium|response to fungus|response to ethylene|abscisic acid-activated signaling pathway|negative regulati…
LOC103405871	471.998721402369	879.052073125187	64.9453696795499	0.0738811404524166	-3.75865005339012	2.08286191538425e-24	2.53706583726846e-22	Down	40.4248	55.3067	40.0601	5.61099	0.943458	2.5236	ZPR1	uncharacterized LOC103405871	GO:0009943,GO:0010358	adaxial/abaxial axis specification|leaf shaping
LOC103405877	66.2266274543215	42.9550927267482	89.4981621818948	2.0835285527428	1.05902887091552	0.00201099688072424	0.0121760233024636	Up	1.07019	1.17441	0.939992	2.21938	1.1655	2.12148	SHM3	serine hydroxymethyltransferase 3, chloroplastic-like	GO:0004372,GO:0006544,GO:0006565,GO:0006730,GO:0008270,GO:0009507,GO:0009536,GO:0009570,GO:0016597,GO:0019264,GO:0030170,GO:0035999,GO:0046653,GO:0046655,GO:0050897,GO:0070905,GO:1904482	glycine hydroxymethyltransferase activity|glycine metabolic process|L-serine catabolic process|one-carbon metabolic process|zinc ion binding|chloroplast|plastid|chloroplast stroma|amino acid binding|glycine biosynthetic process from serine|pyridoxal phosphate binding|tetrahydrofolate interconversion|tetrahydrofolate metabolic process|folic acid metabolic process|cobalt ion binding|serine binding|…	path:mdm00260,path:mdm00460,path:mdm00630,path:mdm00670	Glycine, serine and threonine metabolism|Cyanoamino acid metabolism|Glyoxylate and dicarboxylate metabolism|One carbon pool by folate
LOC103405902	636.692207338018	1036.31090628532	237.07350839072	0.228766779306141	-2.12805053057716	3.15079350137239e-15	1.70731782438852e-13	Down	12.8957	13.5705	18.0514	2.9996	2.77369	3.42589	ARF8	auxin response factor 8	GO:0003700,GO:0005634,GO:0009733,GO:0009734,GO:0009908,GO:0043565	DNA-binding transcription factor activity|nucleus|response to auxin|auxin-activated signaling pathway|flower development|sequence-specific DNA binding
LOC103405905	172.782163535568	272.746805697882	72.8175213732536	0.266978457133289	-1.90520476136731	7.33334688980955e-09	1.64673684225855e-07	Down	3.22866	1.88979	3.44344	0.687758	0.736933	0.795906		uncharacterized LOC103405905
LOC103405911	171.347695935571	296.864968700217	45.8304231709258	0.154381378751384	-2.6954293474832	6.13595221905948e-23	6.49201659965454e-21	Down	1.86613	1.8051	2.15535	0.20985	0.165053	0.298218	XYL2	putative alpha-xylosidase 2	GO:0000272,GO:0005618,GO:0009506,GO:0030246,GO:0048046,GO:0061634,GO:0071555	polysaccharide catabolic process|cell wall|plasmodesma|carbohydrate binding|apoplast|alpha-D-xyloside xylohydrolase|cell wall organization
LOC103405913	28.397749767809	38.3282570407157	18.4672424949023	0.48181795679581	-1.05343993273997	0.0264207145713718	0.0978332501499642	Down	0.628674	0.440853	0.501042	0.26199	0.192689	0.191185	N	disease resistance protein RML1A-like	GO:0005524,GO:0005737,GO:0007165,GO:0009626,GO:0043531	ATP binding|cytoplasm|signal transduction|plant-type hypersensitive response|ADP binding
LOC103405916	241.449219633419	103.834082103372	379.064357163466	3.65067374300173	1.8681627423457	6.53810170955176e-15	3.39068995634894e-13	Up	0.794495	0.764874	1.06272	3.24799	2.65086	2.77823	RPPL1	putative disease resistance RPP13-like protein 1
LOC103405974	265.318395967566	365.010508130288	165.626283804843	0.453757577153708	-1.14000636047141	8.12045742548651e-07	1.27802421696446e-05	Down	17.7912	16.2799	16.2985	6.98717	6.67351	6.20821	CYP20-3	peptidyl-prolyl cis-trans isomerase-like	GO:0003755,GO:0006457,GO:0006979,GO:0009535,GO:0009570,GO:0009642,GO:0009651,GO:0009737,GO:0009941,GO:0022626,GO:0048046,GO:0051082	peptidyl-prolyl cis-trans isomerase activity|protein folding|response to oxidative stress|chloroplast thylakoid membrane|chloroplast stroma|response to light intensity|response to salt stress|response to abscisic acid|chloroplast envelope|cytosolic ribosome|apoplast|unfolded protein binding
LOC103406008	438.788582498227	675.986524492683	201.590640503772	0.298216951373495	-1.74556582865633	0.0084191162306074	0.0396562129732026	Down	6.3354	15.0984	8.19267	3.70729	2.79904	1.43643	cnd3	condensin complex subunit 3	GO:0000793,GO:0000799,GO:0005634,GO:0005737,GO:0005829,GO:0007076,GO:0051301	condensed chromosome|nuclear condensin complex|nucleus|cytoplasm|cytosol|mitotic chromosome condensation|cell division
LOC103406149	5.68102091580171	9.97684999937349	1.38519183222994	0.138840599218884	-2.84849859810106	0.0173407310861392	0.0703776836325321	Down	0.258566	0.0359306	0.460712	0	0	0.0784503		uncharacterized LOC103406149
LOC103406163	10.8126959466214	0.300649115718403	21.3247427775244	70.9290054839138	6.14830381417775	3.6334165588034e-07	6.08859803697749e-06	Up	0	0.0374362	0	0.606282	0.218484	0.284908	CSE	uncharacterized LOC103406163	GO:0003846,GO:0004622,GO:0005783,GO:0005794,GO:0005886,GO:0006979,GO:0009506,GO:0009809,GO:0010043,GO:0016020,GO:0016787,GO:0042542,GO:0046686,GO:0090430	2-acylglycerol O-acyltransferase activity|lysophospholipase activity|endoplasmic reticulum|Golgi apparatus|plasma membrane|response to oxidative stress|plasmodesma|lignin biosynthetic process|response to zinc ion|membrane|hydrolase activity|response to hydrogen peroxide|response to cadmium ion|caffeoyl-CoA: alcohol caffeoyl transferase activity
LOC103406172	52.90853791183	103.087972995705	2.72910282795509	0.0264735327376046	-5.23930546290712	1.79165960104374e-24	2.19157011958895e-22	Down	3.90208	3.05326	3.59916	0.0763956	0.034711	0.0387276		uncharacterized LOC103406172
LOC103406179	93.0389841210947	125.684730727267	60.3932375149227	0.480513720047464	-1.05735047021123	0.0110978619003408	0.0494948434609636	Down	4.35178	8.32975	7.75518	3.63342	2.82282	2.01342	ATL67	RING-H2 finger protein ATL67	GO:0016021,GO:0016567,GO:0016740,GO:0046872	integral component of membrane|protein ubiquitination|transferase activity|metal ion binding
LOC103406180	33.6669365446784	15.6541745081897	51.679698581167	3.30133655748695	1.72305022279755	0.00121047772924478	0.00796096858246529	Up	0.823718	1.19685	0.700238	2.85202	3.06909	1.46387	At1g64065	late embryogenesis abundant protein At1g64065	GO:0005886,GO:0016021	plasma membrane|integral component of membrane
LOC103406209	28.0340093899447	41.0086956615468	15.0593231183425	0.367222679858686	-1.44527293180768	0.00281847106963986	0.0161445319717169	Down	1.20192	0.680289	0.955562	0.259401	0.224608	0.456119	APF2	aspartyl protease family protein 2-like	GO:0004190,GO:0006508,GO:0009505,GO:0016020,GO:0030163,GO:0080167	aspartic-type endopeptidase activity|proteolysis|plant-type cell wall|membrane|protein catabolic process|response to karrikin
LOC103406221	35.6843086654773	12.1381336845968	59.2304836463578	4.879702694453	2.2867932514143	3.90075463450617e-05	0.00041483080284055	Up	0.399459	0.130031	0.450918	1.45959	0.967405	2.12768		NDR1/HIN1-like protein 6
LOC103406235	113.731323772087	73.5051006484864	153.957546895688	2.09451514979809	1.06661631937251	0.000642868122787285	0.00464988694600883	Up	4.426	4.22892	4.53662	11.0437	7.20899	6.5712	SAUR32	auxin-responsive protein SAUR32-like	GO:0005634,GO:0005737,GO:0007275,GO:0009734,GO:0040008,GO:1900140	nucleus|cytoplasm|multicellular organism development|auxin-activated signaling pathway|regulation of growth|regulation of seedling development	path:mdm04075	Plant hormone signal transduction
LOC103406245	111.463158240704	175.412579614521	47.5137368668859	0.270868468905137	-1.88433563195564	1.09220642570845e-06	1.66647706743621e-05	Down	10.2746	7.38906	6.14893	2.86019	1.89385	1.30036	NTL9	protein NTM1-like 9	GO:0003700,GO:0005516,GO:0005634,GO:0005789,GO:0005886,GO:0006355,GO:0016021,GO:0031347,GO:0044212,GO:0045892,GO:0071470,GO:1900426	DNA-binding transcription factor activity|calmodulin binding|nucleus|endoplasmic reticulum membrane|plasma membrane|regulation of transcription, DNA-templated|integral component of membrane|regulation of defense response|transcription regulatory region DNA binding|negative regulation of transcription, DNA-templated|cellular response to osmotic stress|positive regulation of defense response to bac…
LOC103406258	70.6327500981422	105.504028849773	35.7614713465111	0.338958348191913	-1.56082009158137	3.90276870875367e-06	5.22592447421566e-05	Down	2.17659	2.23244	2.36292	0.663531	0.710186	0.635581	AHL22	AT-hook motif nuclear-localized protein 25-like	GO:0003680,GO:0003700,GO:0005634,GO:0009640,GO:0009647,GO:0009908,GO:0010228,GO:0042826,GO:0043621	AT DNA binding|DNA-binding transcription factor activity|nucleus|photomorphogenesis|skotomorphogenesis|flower development|vegetative to reproductive phase transition of meristem|histone deacetylase binding|protein self-association
LOC103406263	152.284202316536	93.8236401795054	210.744764453566	2.24617979061956	1.16747340977506	8.32240350088597e-06	0.000103514064469634	Up	3.73513	4.93578	3.40941	7.88203	9.40878	7.19794		uncharacterized LOC103406263
LOC103406265	178.836449841045	91.1139667965481	266.558932885543	2.92555512900402	1.54871040448134	9.44467204114847e-06	0.000115644526016238	Up	1.33678	1.20571	1.55034	4.06828	2.47412	4.28136	WAV3	E3 ubiquitin-protein ligase WAV3	GO:0005886,GO:0009630,GO:0016567,GO:0046872,GO:0048364,GO:0061630	plasma membrane|gravitropism|protein ubiquitination|metal ion binding|root development|ubiquitin protein ligase activity
LOC103406267	3.4652570531512	0	6.93051410630241	Inf	Inf	0.00492130433442021	0.025636767772658	Up	0	0	0	0.861093	0.316092	0		late embryogenesis abundant protein At1g64065-like
LOC103406285	256.083393147592	450.323968937742	61.8428173574425	0.137329615173099	-2.86428531822877	0.0173707538792627	0.0704314102762783	Down	4.44611	18.0176	7.6309	0.836594	1.81658	1.05473	ARP1	probable RNA-binding protein ARP1	GO:0003729,GO:0005634,GO:0009414,GO:0009651,GO:0009737,GO:0010029	mRNA binding|nucleus|response to water deprivation|response to salt stress|response to abscisic acid|regulation of seed germination
LOC103406296	106.575039392991	146.107150068195	67.042928717787	0.458861381434756	-1.12386970273082	0.000108560967725873	0.00100903573400868	Down	1.80958	2.06365	1.56517	0.56605	1.0087	0.864305	LSMT-L	ribosomal lysine N-methyltransferase 4-like	GO:0009507,GO:0009570,GO:0016279,GO:0018023,GO:0018026,GO:0030785	chloroplast|chloroplast stroma|protein-lysine N-methyltransferase activity|peptidyl-lysine trimethylation|peptidyl-lysine monomethylation|[ribulose-bisphosphate carboxylase]-lysine N-methyltransferase activity
LOC103406324	8.8916361140098	14.3271823311999	3.4560898968197	0.241226070620563	-2.05154225928095	0.0205719529080182	0.080526723575945	Down	0.764642	0.474305	0.977234	0.222843	0.154142	0.0576968		uncharacterized LOC103406324
LOC103406342	238.343570974781	355.830574079851	120.856567869711	0.339646384187858	-1.55789459928202	7.18689590952318e-11	2.24030228405459e-09	Down	3.72278	3.91208	3.69067	0.872021	1.09655	1.21277	kgd1	2-oxoglutarate dehydrogenase, mitochondrial-like	GO:0004591,GO:0005739,GO:0006099,GO:0006103,GO:0009353,GO:0030976,GO:0042645,GO:0045252	oxoglutarate dehydrogenase (succinyl-transferring) activity|mitochondrion|tricarboxylic acid cycle|2-oxoglutarate metabolic process|mitochondrial oxoglutarate dehydrogenase complex|thiamine pyrophosphate binding|mitochondrial nucleoid|oxoglutarate dehydrogenase complex	path:mdm00020	Citrate cycle (TCA cycle)
LOC103406346	9.04724153830639	14.2450920707769	3.8493910058359	0.270225772266699	-1.88776281937904	0.0281256366658874	0.102690454275072	Down	0.633217	0.443608	0.578219	0.293534	0.0540284	0.060597		uncharacterized LOC103406346
LOC103406361	5.29939109602929	0	10.5987821920586	Inf	Inf	0.000741957138254128	0.00527189643087921	Up	0	0	0	0.294565	0.707645	0.296858		suppressor protein SRP40-like
LOC103406365	44.1376193715359	0.648379802026393	87.6268589410454	135.147422339782	7.07839018545734	1.66685387428716e-26	2.26864290214013e-24	Up	0.0274633	0	0	2.37195	1.75805	2.78192	UGT76B1	UDP-glycosyltransferase 76B1-like	GO:0002239,GO:0006952,GO:0008194,GO:0010150,GO:0043231,GO:0046527,GO:0052640,GO:0080043,GO:0080044	response to oomycetes|defense response|UDP-glycosyltransferase activity|leaf senescence|intracellular membrane-bounded organelle|glucosyltransferase activity|salicylic acid glucosyltransferase (glucoside-forming) activity|quercetin 3-O-glucosyltransferase activity|quercetin 7-O-glucosyltransferase activity
LOC103406367	29.2633277945783	58.1757740529334	0.350881536223235	0.0060314029668771	-7.37329065767272	1.70176684397523e-18	1.23955328660407e-16	Down	2.07114	1.38245	1.55309	0.0274972	0	0.0277561	HSP70	heat shock cognate 70 kDa protein-like	GO:0005524	ATP binding	path:mdm03040,path:mdm04141,path:mdm04144	Spliceosome|Protein processing in endoplasmic reticulum|Endocytosis
LOC103406372	193.146823794551	73.573860369031	312.719787220072	4.25041972313992	2.08760531244887	1.36945230585636e-11	4.69827483393799e-10	Up	1.40769	0.994923	1.54871	6.15758	4.41333	3.68898	UBC7	ubiquitin-conjugating enzyme E2 7-like	GO:0005524,GO:0016567,GO:0016740	ATP binding|protein ubiquitination|transferase activity	path:mdm04120,path:mdm04141	Ubiquitin mediated proteolysis|Protein processing in endoplasmic reticulum
LOC103406389	555.1358197406	340.157029927045	770.114609554154	2.2639973359343	1.17887226053877	1.336024911557e-08	2.88824475660234e-07	Up	5.65658	6.36602	6.42454	13.1953	9.374	13.618	LECRKS4	L-type lectin-domain containing receptor kinase S.4-like
LOC103406391	51.2125289768453	68.6863141515093	33.7387438021812	0.491200382768536	-1.02561640995685	0.00589839926045657	0.0298055768800132	Down	1.28338	2.12722	1.91612	0.867415	0.822542	1.15876	FKBP20-2	peptidyl-prolyl cis-trans isomerase FKBP20-2, chloroplastic	GO:0003755,GO:0009507,GO:0009543,GO:0009579,GO:0010207,GO:0016491,GO:0031977	peptidyl-prolyl cis-trans isomerase activity|chloroplast|chloroplast thylakoid lumen|thylakoid|photosystem II assembly|oxidoreductase activity|thylakoid lumen
LOC103406393	154.495616433703	75.0228867193918	233.968346148015	3.11862628031265	1.64091067812291	5.99141617860694e-10	1.61723608024036e-08	Up	0.858021	0.808371	0.741269	2.11124	1.90236	2.08395	DSC1	TMV resistance protein N-like	GO:0005524,GO:0007165,GO:0009626,GO:0042742,GO:0043531	ATP binding|signal transduction|plant-type hypersensitive response|defense response to bacterium|ADP binding
LOC103406408	200.34537417278	321.446077117025	79.2446712285357	0.246525550845923	-2.02019091413255	1.12563326562086e-10	3.38507348240131e-09	Down	2.47929	3.58	2.53054	0.683677	0.613405	0.591053	N	TMV resistance protein N-like	GO:0005524,GO:0005737,GO:0007165,GO:0009626,GO:0043531	ATP binding|cytoplasm|signal transduction|plant-type hypersensitive response|ADP binding
LOC103406428	31.9556527106712	18.6473351254953	45.2639702958472	2.42736937965793	1.27939366417592	0.00486683000768524	0.0253986322093241	Up	1.2541	1.13573	0.966904	2.82098	1.83683	2.7997	HIPP45	copper transport protein ATX1	GO:0030001,GO:0046872	metal ion transport|metal ion binding
LOC103406450	52.4123481614103	4.6908192896807	100.13387703314	21.3467777906993	4.41594641221745	1.97442935072049e-08	4.1387351321321e-07	Up	0.116898	1.12604	0.520025	8.73456	14.7955	8.20456	CYCU4-1	cyclin-U4-1-like	GO:0000079,GO:0007049,GO:0019901,GO:0051301	regulation of cyclin-dependent protein serine/threonine kinase activity|cell cycle|protein kinase binding|cell division
LOC103406454	191.994204142253	76.2159309484726	307.772477336034	4.03816463967501	2.01369973186813	0.000405334786688126	0.00314356754041968	Up	2.05317	1.91179	1.32171	3.61516	8.06709	7.51706	AVT6C	amino acid transporter AVT6C-like	GO:0003333,GO:0015171,GO:0016021	amino acid transmembrane transport|amino acid transmembrane transporter activity|integral component of membrane
LOC103406461	33.2626353966004	56.3829013931623	10.1423694000384	0.17988377946915	-2.47486299353677	6.56986877969581e-06	8.3940280265924e-05	Down	2.42104	2.27269	1.31633	0.321981	0.256748	0.492683	ETG1	mini-chromosome maintenance complex-binding protein-like	GO:0000790,GO:0003682,GO:0005634,GO:0006260,GO:0006261,GO:0006301,GO:0007062,GO:0009941,GO:0042555,GO:0051301	nuclear chromatin|chromatin binding|nucleus|DNA replication|DNA-dependent DNA replication|postreplication repair|sister chromatid cohesion|chloroplast envelope|MCM complex|cell division
LOC103406466	53.2872897695858	75.9525459925207	30.6220335466508	0.403173233319476	-1.31052823342822	0.000398196478443825	0.00309586316034808	Down	1.06165	1.08767	1.03901	0.489468	0.268415	0.317372	GCN5	bromodomain-containing protein DDB_G0280777-like	GO:0004402,GO:0005634	histone acetyltransferase activity|nucleus
LOC103406468	3.76024131224911	7.16960108827499	0.350881536223235	0.0489401755973646	-4.3528369119579	0.015046445236639	0.0629854577862649	Down	0.168478	0.0410606	0.261757	0.0219473	0	0	CYP714A1	cytochrome P450 714A1-like	GO:0004497,GO:0005506,GO:0005789,GO:0016021,GO:0016705,GO:0020037	monooxygenase activity|iron ion binding|endoplasmic reticulum membrane|integral component of membrane|oxidoreductase activity, acting on paired donors, with incorporation or reduction of molecular oxygen|heme binding
LOC103406473	99.6271976811247	64.0944871553102	135.159908206939	2.10876027261794	1.07639509647674	0.0262243853669213	0.0972802215978308	Up	1.40903	1.71141	1.44579	4.0285	1.55728	2.80649	NIP6-1	aquaporin NIP6-1-like	GO:0005886,GO:0006833,GO:0015168,GO:0015204,GO:0015267,GO:0016021,GO:0046713,GO:0046715,GO:0080029	plasma membrane|water transport|glycerol transmembrane transporter activity|urea transmembrane transporter activity|channel activity|integral component of membrane|borate transport|active borate transmembrane transporter activity|cellular response to boron-containing substance levels
LOC103406497	308.397342076552	454.51111427813	162.283569874975	0.357050828410917	-1.48579862938191	6.11423402460342e-11	1.92664830840493e-09	Down	12.0204	9.13883	12.485	4.06527	2.75548	3.92947		uncharacterized LOC103406497
LOC103406500	27.5591213432692	49.8240446993048	5.29419798723363	0.106257892533311	-3.23435809038264	4.34213711142048e-09	1.02221966632896e-07	Down	1.23442	1.29821	1.06973	0.22632	0.0463113	0.129306	ACS12	probable aminotransferase ACS12	GO:0008483,GO:0030170,GO:0042218	transaminase activity|pyridoxal phosphate binding|1-aminocyclopropane-1-carboxylate biosynthetic process
LOC103406512	13.6492670709733	0.949028917744796	26.3495052242018	27.7647021408124	4.79518001369553	2.0026629386159e-06	2.88554664962599e-05	Up	0	0.012149	0	0.288499	0.200601	0.131737	CYB561A	transmembrane ascorbate ferrireductase 1-like	GO:0005773,GO:0005774,GO:0009507,GO:0016021,GO:0016491,GO:0019904,GO:0046872	vacuole|vacuolar membrane|chloroplast|integral component of membrane|oxidoreductase activity|protein domain specific binding|metal ion binding
LOC103406519	8.55255810504527	1.59740871977119	15.5077074903193	9.70803983875876	3.27918002887036	0.000658902864258688	0.00474927748256075	Up	0.0975789	0.0470024	0.109044	0.301889	0.682358	0.507391	EIX1	receptor-like protein EIX1	GO:0005886,GO:0016021,GO:0050832	plasma membrane|integral component of membrane|defense response to fungus
LOC103406539	18.9214247258809	3.30714027290243	34.5357091788594	10.4427711947489	3.38443270510954	0.00525881967190993	0.0271172504960279	Up	0	0.688189	0	0.731422	2.18628	3.39768	CYCU4-1	cyclin-U4-1	GO:0000079,GO:0007049,GO:0019901,GO:0051301	regulation of cyclin-dependent protein serine/threonine kinase activity|cell cycle|protein kinase binding|cell division
LOC103406562	79.3344370215034	122.303062134831	36.3658119081756	0.297341794010722	-1.74980583388115	5.14871109927603e-06	6.71742280684123e-05	Down	3.19372	4.62688	2.62239	0.729595	1.17446	1.27174	CA2	beta-carotene hydroxylase 2, chloroplastic-like	GO:0005506,GO:0016021,GO:0016117,GO:0016491,GO:0016787,GO:0031969	iron ion binding|integral component of membrane|carotenoid biosynthetic process|oxidoreductase activity|hydrolase activity|chloroplast membrane	path:mdm00906	Carotenoid biosynthesis
LOC103406574	50.2707916886453	15.2218859499014	85.3196974273892	5.60506744750258	2.48673173352883	5.8750345256975e-10	1.58878032555943e-08	Up	0.133001	0.11491	0.200402	0.820422	0.533627	0.797378		uncharacterized LOC103406574
LOC103406588	1355.49805469182	2323.90898174857	387.087127635059	0.166567249696589	-2.58582332770739	7.69760813969385e-08	1.45852065339689e-06	Down	189.035	167.268	100.894	18.6294	30.7467	18.403	At4g27740	protein yippee-like At4g27740	GO:0046872	metal ion binding
LOC103406605	103.252075521865	186.641410823978	19.8627402197519	0.106421935689741	-3.23213254509061	8.26592686323695e-23	8.65087435975593e-21	Down	2.48564	2.55111	2.50975	0.338647	0.157151	0.20306	RGA4	putative disease resistance protein RGA4	GO:0005524,GO:0006952,GO:0043531	ATP binding|defense response|ADP binding
LOC103406608	737.785309555931	1223.2327623688	252.337856743059	0.206287686616899	-2.2772703860571	0.0277584830232219	0.101657203492067	Down	88.1145	20.0335	41.2927	12.7377	7.83926	6.97582	HSP18.1	18.1 kDa class I heat shock protein-like	GO:0000302,GO:0005737,GO:0006457,GO:0009408,GO:0009644,GO:0009651,GO:0010286,GO:0042542,GO:0043621,GO:0051082,GO:0051259	response to reactive oxygen species|cytoplasm|protein folding|response to heat|response to high light intensity|response to salt stress|heat acclimation|response to hydrogen peroxide|protein self-association|unfolded protein binding|protein complex oligomerization	path:mdm04141	Protein processing in endoplasmic reticulum
LOC103406609	944.31400619322	1628.54901132494	260.079001061498	0.159699830495064	-2.64656531340973	0.0287449387996267	0.104307895331228	Down	119.243	23.3075	50.3194	13.1056	7.21417	6.3043	HSP18.2	18.2 kDa class I heat shock protein	GO:0005737	cytoplasm	path:mdm04141	Protein processing in endoplasmic reticulum
LOC103406610	102.296772104182	55.9129774272651	148.680566781099	2.65914236054611	1.410961015765	0.0130108382510748	0.0560406780473564	Up	1.41643	1.26428	1.82047	2.85929	2.39869	5.21167	PMR5	protein PMR5-like	GO:0005783,GO:0005794,GO:0006952,GO:0009620,GO:0016021,GO:0016413	endoplasmic reticulum|Golgi apparatus|defense response|response to fungus|integral component of membrane|O-acetyltransferase activity
LOC103406611	11685.5491942857	18653.5916158807	4717.50677269064	0.252900721203438	-1.98335694371009	1.80530337258567e-26	2.42295114681753e-24	Down	411.625	362.333	316.156	95.3882	70.6476	82.6218		asparagine synthetase [glutamine-hydrolyzing]-like	GO:0004066,GO:0005524,GO:0006541,GO:0070981	asparagine synthase (glutamine-hydrolyzing) activity|ATP binding|glutamine metabolic process|L-asparagine biosynthetic process	path:mdm00250	Alanine, aspartate and glutamate metabolism
LOC103406680	939.39157511362	395.649531828467	1483.13361839877	3.7486045074907	1.90635362365754	1.81630818948102e-21	1.70957059782645e-19	Up	11.4414	10.3898	13.3682	36.2912	34.393	30.7865	DBR	2-alkenal reductase (NADP(+)-dependent)-like	GO:0016491	oxidoreductase activity
LOC103406696	134.671302257912	72.5173908056347	196.82521371019	2.71417947506871	1.4405161220945	1.0407882348975e-07	1.91692826745098e-06	Up	1.54406	0.793355	1.20728	3.56281	4.19307	4.18672		uncharacterized LOC103406696
LOC103406706	3496.80613822071	2200.89334087254	4792.71893556888	2.17762435215003	1.12275510555559	9.99583916437284e-09	2.20700211252984e-07	Up	80.3186	81.1542	65.8109	125.722	151.619	144.733	HSR201	methanol O-anthraniloyltransferase-like	GO:0016747	transferase activity, transferring acyl groups other than amino-acyl groups
LOC103406711	1579.84017788258	1034.0780698438	2125.60228592137	2.05555300698181	1.03952657546486	0.000113250935115595	0.00104625385882763	Up	48.1915	24.1153	24.3378	58.832	51.5324	66.5812	SRG1	protein SRG1-like	GO:0010150,GO:0016682,GO:0046872,GO:0051213	leaf senescence|oxidoreductase activity, acting on diphenols and related substances as donors, oxygen as acceptor|metal ion binding|dioxygenase activity
LOC103406737	39.148506945971	62.3776709799435	15.9193429119985	0.25520899805825	-1.97024889891481	4.77532051535479e-06	6.27830121270455e-05	Down	0.816577	0.779633	0.55092	0.220682	0.189196	0.132218		uncharacterized LOC103406737
LOC103406741	567.108339468601	314.531975502657	819.684703434545	2.60604570369864	1.38186238548747	0.000445985807257145	0.00341047970255464	Up	4.57201	9.46648	7.91273	15.0458	22.8417	13.9718	GAI	DELLA protein GAI-like	GO:0003700,GO:0003713,GO:0005634,GO:0006808,GO:0007275,GO:0009723,GO:0009737,GO:0009739,GO:0009740,GO:0009863,GO:0009867,GO:0009938,GO:0009939,GO:0010187,GO:0010218,GO:0010233,GO:0010336,GO:0010628,GO:0010629,GO:0033206,GO:0042538,GO:0043565,GO:1900033,GO:1903508,GO:1905614,GO:1905622,GO:2000033,GO:2000377	DNA-binding transcription factor activity|transcription coactivator activity|nucleus|regulation of nitrogen utilization|multicellular organism development|response to ethylene|response to abscisic acid|response to gibberellin|gibberellic acid mediated signaling pathway|salicylic acid mediated signaling pathway|jasmonic acid mediated signaling pathway|negative regulation of gibberellic acid mediat…	path:mdm04075	Plant hormone signal transduction
LOC103406767	79.4741548129544	106.82146879297	52.1268408329385	0.487980940741088	-1.03510329389281	0.00101525376718704	0.00686545526259673	Down	0.730024	0.896939	0.716696	0.411287	0.322825	0.314969	N	disease resistance-like protein DSC1	GO:0005524,GO:0005737,GO:0007165,GO:0009626,GO:0043531	ATP binding|cytoplasm|signal transduction|plant-type hypersensitive response|ADP binding
LOC103406790	3160.91799648293	2017.85855345378	4303.97743951208	2.13294308074536	1.09284546674643	3.98834167455789e-09	9.42314793361313e-08	Up	29.274	29.5647	30.8862	61.6372	54.5154	54.8932	LAMP1	probable glutamate carboxypeptidase LAMP1	GO:0005773,GO:0005783,GO:0005789,GO:0007275,GO:0008237,GO:0010073,GO:0016021,GO:0040008,GO:0046872	vacuole|endoplasmic reticulum|endoplasmic reticulum membrane|multicellular organism development|metallopeptidase activity|meristem maintenance|integral component of membrane|regulation of growth|metal ion binding
LOC103406792	234.754982321521	406.104329067125	63.405635575916	0.156131395401687	-2.67916742665492	2.25209743775046e-14	1.08995500367923e-12	Down	2.83863	3.77739	2.5248	0.291644	0.318569	0.316029	N	protein SUPPRESSOR OF npr1-1, CONSTITUTIVE 1-like	GO:0005524,GO:0005737,GO:0007165,GO:0009626,GO:0043531	ATP binding|cytoplasm|signal transduction|plant-type hypersensitive response|ADP binding
LOC103406799	135.861040329971	190.96607455814	80.756006101802	0.422881426916569	-1.24167489674288	5.37993197365352e-06	6.99077668831088e-05	Down	5.18898	5.49642	5.85945	2.12094	2.18318	1.52405	At1g61280	phosphatidylinositol N-acetylglucosaminyltransferase subunit P-like	GO:0006506,GO:0016021,GO:0017176	GPI anchor biosynthetic process|integral component of membrane|phosphatidylinositol N-acetylglucosaminyltransferase activity	path:mdm00563	Glycosylphosphatidylinositol (GPI)-anchor biosynthesis
LOC103406806	9.80736055206859	2.11178753848251	17.5029335656547	8.28820761876071	3.05106014284165	0.000937309579552685	0.00639807033464383	Up	0.0987335	0.129089	0	0.512569	0.860432	0.283729	CDA1	cytidine deaminase 1-like	GO:0004126,GO:0005829,GO:0006216,GO:0008270,GO:0009972,GO:0042803,GO:0047844	cytidine deaminase activity|cytosol|cytidine catabolic process|zinc ion binding|cytidine deamination|protein homodimerization activity|deoxycytidine deaminase activity	path:mdm00240	Pyrimidine metabolism
LOC103406819	48.5318629622586	21.0126902091066	76.0510357154105	3.61929076946325	1.85570701674927	0.0473555971991918	0.153647315367048	Up	0.859408	0.651947	0.649935	3.60332	1.64344	1.0195	UGT91C1	UDP-glycosyltransferase 91C1-like	GO:0005829,GO:0008194,GO:0043231,GO:0080043,GO:0080044	cytosol|UDP-glycosyltransferase activity|intracellular membrane-bounded organelle|quercetin 3-O-glucosyltransferase activity|quercetin 7-O-glucosyltransferase activity
LOC103406827	97.3143617589217	56.566239417	138.062484100843	2.44072233763079	1.28730818004007	1.44016633552027e-05	0.000169648200189893	Up	1.18157	1.57129	1.57371	2.94118	3.33503	3.26071	MED20A	mediator of RNA polymerase II transcription subunit 20a	GO:0003713,GO:0006357,GO:0016592,GO:0035196,GO:0045944,GO:1900150,GO:2000031	transcription coactivator activity|regulation of transcription by RNA polymerase II|mediator complex|production of miRNAs involved in gene silencing by miRNA|positive regulation of transcription by RNA polymerase II|regulation of defense response to fungus|regulation of salicylic acid mediated signaling pathway
LOC103406836	9.12639539620478	17.5510277199631	0.701763072446469	0.0399841584004942	-4.64442766787245	0.0121636862816682	0.0532344905352597	Down	0.839168	0.135183	0.368075	0.0486174	0	0	CYP75B2	flavonoid 3'-monooxygenase-like	GO:0004497,GO:0005506,GO:0005789,GO:0009813,GO:0016021,GO:0016705,GO:0020037	monooxygenase activity|iron ion binding|endoplasmic reticulum membrane|flavonoid biosynthetic process|integral component of membrane|oxidoreductase activity, acting on paired donors, with incorporation or reduction of molecular oxygen|heme binding
LOC103406838	18.1065697443544	29.4029944170301	6.81014507167865	0.231613997373487	-2.11020565101141	0.000734159532731665	0.00522321480914027	Down	1.19371	1.84679	1.75087	0.259832	0.62227	0.107085		uncharacterized LOC103406838
LOC103406845	1831.40266181793	2754.85077284164	907.954550794216	0.329583932365838	-1.60128218386247	4.75827484696872e-15	2.51719685791283e-13	Down	109.273	80.0289	100.654	27.7989	33.8012	23.4115	FLZ14	FCS-Like Zinc finger 13-like	GO:0005634,GO:0005737,GO:0009744,GO:0009749,GO:0042594,GO:0046872,GO:1905582	nucleus|cytoplasm|response to sucrose|response to glucose|response to starvation|metal ion binding|response to mannose
LOC103406865	1591.01294721763	1007.45914495861	2174.56674947665	2.15846643544637	1.11000665879818	6.19749473777067e-09	1.40473317003887e-07	Up	14.3265	16.3427	14.2637	25.3558	29.2196	33.9993		NAD-dependent malic enzyme 62 kDa isoform, mitochondrial-like	GO:0004471,GO:0005759,GO:0046872,GO:0051287	malate dehydrogenase (decarboxylating) (NAD+) activity|mitochondrial matrix|metal ion binding|NAD binding	path:mdm00620,path:mdm00710	Pyruvate metabolism|Carbon fixation in photosynthetic organisms
LOC103406876	10.0039021002413	5.00354128615526	15.0042629143274	2.99872871157155	1.58435101064487	0.0499990338272133	0.159844727685368	Up	0.158043	0.0554229	0.0643542	0.342939	0.200521	0.0896034	N	TMV resistance protein N-like	GO:0005524,GO:0005737,GO:0007165,GO:0009626,GO:0043531	ATP binding|cytoplasm|signal transduction|plant-type hypersensitive response|ADP binding
LOC103406883	6.90472074174017	0	13.8094414834803	Inf	Inf	0.000201289033380036	0.00172592992537333	Up	0	0	0	0.487361	0.307376	0.0983786	CER1	very-long-chain aldehyde decarbonylase CER1-like	GO:0000170,GO:0005506,GO:0005789,GO:0009414,GO:0010025,GO:0016021,GO:0030148,GO:0042742,GO:0043447,GO:0050832	sphingosine hydroxylase activity|iron ion binding|endoplasmic reticulum membrane|response to water deprivation|wax biosynthetic process|integral component of membrane|sphingolipid biosynthetic process|defense response to bacterium|alkane biosynthetic process|defense response to fungus	path:mdm00073	Cutin, suberine and wax biosynthesis
LOC103406905	18.2081974933384	36.0655134504535	0.350881536223235	0.00972900432168456	-6.68349211929291	7.88740571932503e-12	2.79530430077302e-10	Down	2.31062	2.11463	2.46471	0.0632686	0	0	FRL4A	FRIGIDA-like protein 4a	GO:0009908,GO:0030154	flower development|cell differentiation
LOC103406926	4.17306648966947	8.01244701949052	0.333685959848413	0.0416459489887061	-4.58568002211052	0.00643639861363877	0.0319614929443967	Down	0.181301	0.347661	0.115801	0	0.0242345	0	DOR	putative F-box protein At5g52610	GO:0009414,GO:0009737,GO:0009738,GO:0009788,GO:0010118,GO:0010119,GO:0016567,GO:0042631	response to water deprivation|response to abscisic acid|abscisic acid-activated signaling pathway|negative regulation of abscisic acid-activated signaling pathway|stomatal movement|regulation of stomatal movement|protein ubiquitination|cellular response to water deprivation
LOC103406950	51.6733579654991	101.93630010235	1.41041582864808	0.013836247021247	-6.17540351400221	0.000110354479538784	0.00102275459137767	Down	4.868	1.07784	2.0664	0	0.0233299	0.0780858	CYP75B2	flavonoid 3'-monooxygenase-like	GO:0004497,GO:0005506,GO:0005789,GO:0009813,GO:0016021,GO:0016705,GO:0020037	monooxygenase activity|iron ion binding|endoplasmic reticulum membrane|flavonoid biosynthetic process|integral component of membrane|oxidoreductase activity, acting on paired donors, with incorporation or reduction of molecular oxygen|heme binding
LOC103406951	11.2597102244269	21.4679145764722	1.05150587238153	0.0489803454655966	-4.35165324029616	4.23157399312654e-06	5.62721697526323e-05	Down	1.56513	2.05268	1.19879	0	0	0.202747	YNL320W	uncharacterized protein MT2364-like	GO:0016021,GO:0031966	integral component of membrane|mitochondrial membrane
LOC103406967	157.343913466073	104.247107087856	210.440719844291	2.01867203534902	1.01340654147226	7.61803229688518e-05	0.000744347657151763	Up	4.67601	5.10791	5.33064	11.085	9.08631	7.03152		3-hydroxyacyl-[acyl-carrier-protein] dehydratase FabZ-like			path:mdm00061,path:mdm00780	Fatty acid biosynthesis|Biotin metabolism
LOC103406981	66.6024315623305	42.6423707302737	90.5624923943873	2.12376776533423	1.08662601561545	0.00124985587392119	0.00816249645978268	Up	2.32751	3.07134	2.31882	3.92432	6.14238	4.64443	ATL4	E3 ubiquitin-protein ligase ATL4-like	GO:0004842,GO:0016021,GO:0016567,GO:0031625,GO:0046872	ubiquitin-protein transferase activity|integral component of membrane|protein ubiquitination|ubiquitin protein ligase binding|metal ion binding
LOC103406983	395.659145004051	146.944009930079	644.374280078024	4.38516874818266	2.13263236090992	1.03720870123344e-11	3.59673208717194e-10	Up	4.1559	6.53393	4.25625	15.1457	21.2433	21.8661	DAO	2-oxoglutarate-dependent dioxygenase DAO-like	GO:0009852,GO:0046872,GO:0051213	auxin catabolic process|metal ion binding|dioxygenase activity
LOC103407028	9.21842236691247	4.22835119386143	14.2084935399635	3.36029172803595	1.74858648786143	0.0328681043538719	0.115946257631875	Up	0.098764	0.0948523	0.257049	0.205023	0.214203	0.20509		zinc finger MYM-type protein 1-like
LOC103407049	162.303070696483	296.921915388317	27.6842260046499	0.0932373953214072	-3.42294748785381	8.14232619491027e-32	1.61675367390718e-29	Down	7.92733	9.48277	8.7059	0.294413	0.188415	0.632266	TLP1	thaumatin-like protein 1	GO:0006952,GO:0009617,GO:0009723	defense response|response to bacterium|response to ethylene
LOC103407051	1711.77385489896	97.5941456169446	3325.95356418098	34.0794372772655	5.09082960873747	6.04842472958228e-06	7.78268233069642e-05	Up	3.42095	2.49175	3.16181	49.449	134.248	68.2046	GASA11	snakin-2-like	GO:0005576,GO:0009740	extracellular region|gibberellic acid mediated signaling pathway
LOC103407080	4.15744020339697	7.59706049426083	0.717819912533114	0.0944865337159534	-3.40374745965345	0.0212644324770339	0.0827346527324135	Down	0.227456	0.109949	0.179735	0	0	0.0239492	TAF14B	transcription initiation factor TFIID subunit 14b-like	GO:0005634,GO:0005737,GO:0006281,GO:0006355,GO:0009908,GO:0009909,GO:0030154,GO:0035267,GO:0043981,GO:0048510,GO:0090239,GO:2000028	nucleus|cytoplasm|DNA repair|regulation of transcription, DNA-templated|flower development|regulation of flower development|cell differentiation|NuA4 histone acetyltransferase complex|histone H4-K5 acetylation|regulation of timing of transition from vegetative to reproductive phase|regulation of histone H4 acetylation|regulation of photoperiodism, flowering
LOC103407084	17.1651244377999	0	34.3302488755998	Inf	Inf	0.0306467929755396	0.109536497147194	Up	0	0	0	2.51663	0.242874	0.233937	DEFA	floral homeotic protein DEFICIENS-like	GO:0000977,GO:0003700,GO:0005634,GO:0007275,GO:0045944,GO:0046983	RNA polymerase II regulatory region sequence-specific DNA binding|DNA-binding transcription factor activity|nucleus|multicellular organism development|positive regulation of transcription by RNA polymerase II|protein dimerization activity
LOC103407093	476.125911349075	21.6681546333686	930.583668064782	42.9470660427953	5.42448767095216	7.67689151386397e-06	9.62599848559327e-05	Up	0.298082	0.174698	0.90653	29.4501	8.90422	13.0804		cold-shock protein CS120-like
LOC103407117	70.2807010694833	126.99619525857	13.5652068803967	0.106815852654304	-3.22680232006653	8.57584325533625e-18	5.90531344352014e-16	Down	2.43257	2.23669	1.88886	0.228256	0.175337	0.21621	SFH12	phosphatidylinositol/phosphatidylcholine transfer protein SFH12-like	GO:0000139,GO:0005886,GO:0015031	Golgi membrane|plasma membrane|protein transport
LOC103407118	6.06552923376247	0.303063691869633	11.8279947756553	39.0280825218194	5.28644067874501	0.000277738849591009	0.00227748323479105	Up	0.0177697	0	0	0.16826	0.185382	0.245672		uncharacterized LOC103407118
LOC103407153	2.59608163263644	0	5.19216326527288	Inf	Inf	0.015557501722204	0.0646148961213028	Up	0	0	0	0.167928	0.182451	0.136843	ZAT9	zinc finger protein ZAT9-like	GO:0003700,GO:0005634,GO:0006355,GO:0044212,GO:0046872	DNA-binding transcription factor activity|nucleus|regulation of transcription, DNA-templated|transcription regulatory region DNA binding|metal ion binding
LOC103407180	2.2234550245784	4.44691004915681	0	0	-Inf	0.0355283548881201	0.123039900633927	Down	0.153373	0.0297033	0.172888	0	0	0	At2g27500	glucan endo-1,3-beta-glucosidase 14-like	GO:0005576,GO:0005618,GO:0005634,GO:0005737,GO:0005975,GO:0006952,GO:0042973,GO:0046658,GO:0071555	extracellular region|cell wall|nucleus|cytoplasm|carbohydrate metabolic process|defense response|glucan endo-1,3-beta-D-glucosidase activity|anchored component of plasma membrane|cell wall organization
LOC103407220	81.1143158527195	132.686744236452	29.5418874689866	0.222643849157546	-2.16719033899013	5.53402225019528e-11	1.75911518676712e-09	Down	3.95581	4.53463	3.67541	0.816187	0.778933	0.67626	At3g60660	spindle and kinetochore-associated protein 1 homolog	GO:0007059,GO:0008017,GO:0051301	chromosome segregation|microtubule binding|cell division
LOC103407240	43.0323434274456	75.6459691715958	10.4187176832954	0.1377299781785	-2.86008548557928	8.73607675392318e-11	2.68282696076518e-09	Down	2.2333	1.79247	1.37072	0.317963	0.270371	0.212802	CIPK4	CBL-interacting serine/threonine-protein kinase 4-like	GO:0004674,GO:0005524,GO:0005634,GO:0005737,GO:0006468,GO:0035556	protein serine/threonine kinase activity|ATP binding|nucleus|cytoplasm|protein phosphorylation|intracellular signal transduction
LOC103407242	29.5154090283694	45.3819107670444	13.6489072896944	0.30075655826299	-1.73333189790053	0.000326936407019314	0.0026117074785037	Down	0.79781	0.663684	0.768543	0.115148	0.144146	0.322312	NOG1	nucleolar GTP-binding protein 1-like	GO:0005525,GO:0005730,GO:0042254	GTP binding|nucleolus|ribosome biogenesis	path:mdm03008	Ribosome biogenesis in eukaryotes
LOC103407243	27.8919526164487	4.65581059984727	51.1280946330501	10.9815666974785	3.4570119876133	8.85458102858191e-06	0.000109231618731315	Up	0.142159	0.136542	0.106543	1.31465	1.60405	2.33029	FEY	dehydrogenase/reductase SDR family member FEY-like	GO:0005783,GO:0010073,GO:0016491,GO:2000024	endoplasmic reticulum|meristem maintenance|oxidoreductase activity|regulation of leaf development
LOC103407259	14.7468700038361	0	29.4937400076723	Inf	Inf	8.29372418708546e-05	0.000802520240933269	Up	0	0	0	1.80194	1.55421	0.157457	SWEET1	bidirectional sugar transporter SWEET1-like	GO:0005783,GO:0005789,GO:0005886,GO:0005887,GO:0051119,GO:0051260	endoplasmic reticulum|endoplasmic reticulum membrane|plasma membrane|integral component of plasma membrane|sugar transmembrane transporter activity|protein homooligomerization
LOC103407277	53.5913861369811	31.7586911960365	75.4240810779258	2.37491150414091	1.24787375558433	0.0222857008239869	0.085718782922566	Up	0.545063	1.34197	0.972674	1.26103	2.9194	1.75083	SUFE2	sufE-like protein 2, chloroplastic	GO:0008047,GO:0009507,GO:0016226,GO:0051176	enzyme activator activity|chloroplast|iron-sulfur cluster assembly|positive regulation of sulfur metabolic process
LOC103407314	53.5922365295523	87.8686553994541	19.3158176596505	0.219826029792308	-2.18556586770465	1.50269525663227e-08	3.21736598890468e-07	Down	1.34523	1.85472	1.13678	0.321256	0.367866	0.238161	IP5P10	type I inositol polyphosphate 5-phosphatase 10-like	GO:0004439,GO:0034485,GO:0046856	phosphatidylinositol-4,5-bisphosphate 5-phosphatase activity|phosphatidylinositol-3,4,5-trisphosphate 5-phosphatase activity|phosphatidylinositol dephosphorylation
LOC103407349	60.8378537165857	0.648379802026393	121.027327631145	186.661162566903	7.54427797593181	3.92389383212261e-35	8.88700642134645e-33	Up	0	0	0	2.22474	2.17286	2.09112	LCMT1	leucine carboxyl methyltransferase 1 homolog	GO:0005737,GO:0008757,GO:0016020,GO:0032259,GO:1900458	cytoplasm|S-adenosylmethionine-dependent methyltransferase activity|membrane|methylation|negative regulation of brassinosteroid mediated signaling pathway
LOC103407374	5.27679724809384	0.606127383739267	9.94746711244841	16.4115124630756	4.03663629671458	0.0045462426991746	0.0240722512966341	Up	0.124668	0.0596395	0	0.324143	1.16448	0.777918	bglJ	probable beta-glucosidase H	GO:0005576,GO:0008422,GO:0030245,GO:0102483	extracellular region|beta-glucosidase activity|cellulose catabolic process|scopolin beta-glucosidase activity	path:mdm00460,path:mdm00500,path:mdm00940	Cyanoamino acid metabolism|Starch and sucrose metabolism|Phenylpropanoid biosynthesis
LOC103407403	2.80480781724424	5.60961563448847	0	0	-Inf	0.0253236632037801	0.0947390626245431	Down	0.110221	0.0706232	0.289057	0	0	0		KHG/KDPG aldolase-like
LOC103407413	36.8334361344212	55.5436216264082	18.1232506424342	0.326288601854825	-1.61577950382514	0.000191229970900256	0.0016528792058433	Down	0.677319	0.783836	0.683978	0.238543	0.177649	0.226852		uncharacterized LOC103407413
LOC103407484	3524.64239922495	2321.3819811744	4727.9028172755	2.03667593511845	1.0262164447168	2.61336213248499e-08	5.37290844395037e-07	Up	93.3822	79.3855	82.6217	142.098	184.016	151.259		ATP synthase subunit O, mitochondrial-like	GO:0005743,GO:0015986,GO:0046933	mitochondrial inner membrane|ATP synthesis coupled proton transport|proton-transporting ATP synthase activity, rotational mechanism	path:mdm00190	Oxidative phosphorylation
LOC103407492	86.1059465923634	57.0395227344532	115.172370450274	2.01916784939554	1.01376084401526	0.00136048841945544	0.0087723663879033	Up	1.74968	0.522915	1.21571	2.80993	2.0857	1.82754	NTAN1	protein N-terminal asparagine amidohydrolase-like	GO:0008418	protein-N-terminal asparagine amidohydrolase activity
LOC103407499	199.125311878072	273.59525046443	124.655373291713	0.455619653777284	-1.13409811387413	0.000469727896438978	0.00356108345856386	Down	7.47002	9.71157	12.4733	4.56604	3.51154	3.73223	RBCX2	chaperonin-like RbcX protein 2, chloroplastic	GO:0009570,GO:0044183,GO:0061077	chloroplast stroma|protein binding involved in protein folding|chaperone-mediated protein folding
LOC103407510	113.956090652685	159.004781764462	68.9073995409073	0.43336683825636	-1.20633933396506	2.2435694697659e-05	0.000252194955131886	Down	2.41963	2.36201	2.54749	0.916914	0.928036	0.740403	At3g53170	pentatricopeptide repeat-containing protein At3g53170-like
LOC103407520	264.041236509511	59.4593515658884	468.623121453134	7.88140316218957	2.97845250213355	1.04609931585636e-06	1.60118369412227e-05	Up	0.501193	1.83631	0.85918	5.76002	10.7854	6.90365	OFUT20	O-fucosyltransferase 20-like
LOC103407531	21.2875124548253	31.2068360759344	11.3681888337162	0.364285210011498	-1.45685967207186	0.0095982952746597	0.0441253694913391	Down	0.295482	0.814849	0.844985	0.184325	0.266126	0.125989	N	disease resistance protein RPS6-like	GO:0005524,GO:0005737,GO:0007165,GO:0009626,GO:0043531	ATP binding|cytoplasm|signal transduction|plant-type hypersensitive response|ADP binding
LOC103407569	17.2712619076926	7.58981676580714	26.9527070495781	3.55116702830069	1.82829321877454	0.00277816841825343	0.0159483371178549	Up	0.243908	0.260691	0.305163	0.756174	0.901543	0.657881	CPR1	F-box protein CPR1-like	GO:0005634,GO:0005737,GO:0009626,GO:0016567,GO:0031348,GO:0042177	nucleus|cytoplasm|plant-type hypersensitive response|protein ubiquitination|negative regulation of defense response|negative regulation of protein catabolic process
LOC103407596	186.456173087253	359.287524144941	13.6248220295644	0.0379217788371299	-4.72082954992372	4.83615337923556e-51	2.33666810773398e-48	Down	4.29903	3.39241	3.5554	0.0272657	0.0124155	0	MED15A	mediator of RNA polymerase II transcription subunit 15a-like	GO:0003713,GO:0005634,GO:0009751,GO:0016592,GO:0031490,GO:0045723	transcription coactivator activity|nucleus|response to salicylic acid|mediator complex|chromatin DNA binding|positive regulation of fatty acid biosynthetic process
LOC103407598	32.1062719448803	11.8701317179667	52.3424121717939	4.4095898356855	2.14064446767792	6.8919718833088e-06	8.761252121416e-05	Up	0.166739	0.0800313	0.0932863	1.28646	0.928215	1.38372	TPR4	topless-related protein 4-like	GO:0003714,GO:0005634,GO:0006355,GO:0009938,GO:0010072,GO:0010336,GO:1903507	transcription corepressor activity|nucleus|regulation of transcription, DNA-templated|negative regulation of gibberellic acid mediated signaling pathway|primary shoot apical meristem specification|gibberellic acid homeostasis|negative regulation of nucleic acid-templated transcription
LOC103407615	37.9125557490792	22.6547128879101	53.1703986102483	2.34699061839018	1.23081207499742	0.00289179487264241	0.0164928454373212	Up	0.855714	0.635247	0.891348	2.47492	2.47829	1.86169	COR413PM2	cold-regulated 413 plasma membrane protein 1-like	GO:0005774,GO:0005886,GO:0016021	vacuolar membrane|plasma membrane|integral component of membrane
LOC103407620	8.01083190602078	1.55515630148406	14.4665075105575	9.30228524088049	3.21758517866003	0.00126937848186051	0.0082769415630086	Up	0.14288	0.0462292	0.053811	0.245681	0.449608	0.251187	COQ5	2-methoxy-6-polyprenyl-1,4-benzoquinol methylase, mitochondrial-like	GO:0005739,GO:0006744,GO:0031314,GO:0043333,GO:0043429	mitochondrion|ubiquinone biosynthetic process|extrinsic component of mitochondrial inner membrane|2-octaprenyl-6-methoxy-1,4-benzoquinone methylase activity|2-nonaprenyl-6-methoxy-1,4-benzoquinone methyltransferase activity	path:mdm00130	Ubiquinone and other terpenoid-quinone biosynthesis
LOC103407627	3.6494719474034	0.303063691869633	6.99588020293716	23.0838612166928	4.52881265735678	0.0117397273711525	0.0518328809761972	Up	0.0698455	0.801001	0.794093	0.639857	1.327	0.468584	PIK-1	heavy metal-associated isoprenylated plant protein 47-like	GO:0005524,GO:0009626,GO:0009870,GO:0042742,GO:0043531	ATP binding|plant-type hypersensitive response|defense response signaling pathway, resistance gene-dependent|defense response to bacterium|ADP binding
LOC103407637	12.8229504822798	19.7703089395032	5.87559202505635	0.297192726883306	-1.7505292852618	0.0197629845907989	0.0781195695783011	Down	0.580831	0.328601	0.190287	0.0391343	0.124865	0.120288	AZF2	hypermethylated in cancer 2 protein-like	GO:0003677,GO:0003700,GO:0005634,GO:0009414,GO:0009737,GO:0009738,GO:0009793,GO:0010200,GO:0042538,GO:0043565,GO:0044212,GO:0045892,GO:0046872	DNA binding|DNA-binding transcription factor activity|nucleus|response to water deprivation|response to abscisic acid|abscisic acid-activated signaling pathway|embryo development ending in seed dormancy|response to chitin|hyperosmotic salinity response|sequence-specific DNA binding|transcription regulatory region DNA binding|negative regulation of transcription, DNA-templated|metal ion binding
LOC103407656	32.067954159415	52.6312936104033	11.5046147084266	0.218588864518286	-2.19370818661972	4.19665082730702e-06	5.58846612235326e-05	Down	0.707102	0.642441	0.552153	0.132737	0.140264	0.0895081	ATHB-15	uncharacterized LOC103407656	GO:0003677,GO:0005634,GO:0008289,GO:0030154	DNA binding|nucleus|lipid binding|cell differentiation
LOC103407677	72.5307817532553	25.3907875023128	119.670776004198	4.71315732106762	2.23669383805517	9.34403220886828e-11	2.85140519721149e-09	Up	0.20955	0.30227	0.222494	1.29349	0.946233	1.0378	N	TMV resistance protein N-like	GO:0005524,GO:0005737,GO:0007165,GO:0009626,GO:0043531	ATP binding|cytoplasm|signal transduction|plant-type hypersensitive response|ADP binding
LOC103407687	13.3342021605354	20.0394624944435	6.62894182662728	0.330794392737098	-1.59599331515128	0.0225787518425652	0.0866849444995319	Down	0.118779	0.308666	0.293538	0.0738833	0.05547	0.0619189	GCN5	uncharacterized LOC103407687	GO:0004402,GO:0005634	histone acetyltransferase activity|nucleus
LOC103407702	876.540910110758	541.861389753725	1211.22043046779	2.23529569253548	1.16046568865139	0.00940224118171304	0.0434168480181365	Up	13.7081	14.6223	18.4319	20.8053	41.5578	28.0039	NPSN11	novel plant SNARE 11-like	GO:0000149,GO:0000911,GO:0005484,GO:0005789,GO:0005794,GO:0005829,GO:0005886,GO:0006623,GO:0006888,GO:0006891,GO:0006896,GO:0009504,GO:0012507,GO:0016021,GO:0031201,GO:0031902,GO:0042147,GO:0048280	SNARE binding|cytokinesis by cell plate formation|SNAP receptor activity|endoplasmic reticulum membrane|Golgi apparatus|cytosol|plasma membrane|protein targeting to vacuole|ER to Golgi vesicle-mediated transport|intra-Golgi vesicle-mediated transport|Golgi to vacuole transport|cell plate|ER to Golgi transport vesicle membrane|integral component of membrane|SNARE complex|late endosome membrane|ret…
LOC103407706	283.615410301164	175.03429814284	392.196522459488	2.24068383522999	1.16393909618225	2.55188037146135e-07	4.40351261718241e-06	Up	9.60722	7.00556	7.3734	14.1746	18.3261	14.7738	ANX1	SAGA-associated factor 11 homolog
LOC103407719	2.63579814409573	5.27159628819146	0	0	-Inf	0.0170281415741377	0.0692933498363632	Down	0.0554686	0.0119722	0.0139463	0	0	0		uncharacterized LOC103407719
LOC103407730	162.177890502809	228.526798860826	95.828982144792	0.4193336738732	-1.25382940689431	0.000369237127863105	0.00289886086633113	Down	4.25093	6.12868	4.34413	1.80468	1.18447	2.73551	RCA	ribulose bisphosphate carboxylase/oxygenase activase, chloroplastic	GO:0005524,GO:0009570	ATP binding|chloroplast stroma
LOC103407783	622.67350856761	214.509775501169	1030.83724163405	4.80554902090433	2.26470126439932	1.70353415802533e-26	2.30773155332497e-24	Up	6.81257	5.64714	5.39518	27.1582	20.8452	23.5954	CDC48	uncharacterized LOC103407783	GO:0005524,GO:0005634,GO:0005737,GO:0005829,GO:0005886,GO:0016236,GO:0016887,GO:0030433,GO:0030970,GO:0031593,GO:0034098,GO:0051228,GO:0071712,GO:0097352	ATP binding|nucleus|cytoplasm|cytosol|plasma membrane|macroautophagy|ATPase activity|ubiquitin-dependent ERAD pathway|retrograde protein transport, ER to cytosol|polyubiquitin modification-dependent protein binding|VCP-NPL4-UFD1 AAA ATPase complex|mitotic spindle disassembly|ER-associated misfolded protein catabolic process|autophagosome maturation	path:mdm04141	Protein processing in endoplasmic reticulum
LOC103407786	295.411502786927	7.15516666677367	583.667838907079	81.5729201134403	6.35001839289216	4.91920856816034e-06	6.44464454204165e-05	Up	0.198697	0.273399	0.0957288	4.37332	22.271	18.863	SCPL48	serine carboxypeptidase-like	GO:0004185,GO:0005576,GO:0005773,GO:0051603	serine-type carboxypeptidase activity|extracellular region|vacuole|proteolysis involved in cellular protein catabolic process
LOC103407787	836.659433503357	532.60813733619	1140.71072967053	2.14174483960333	1.09878661241018	2.40791600532773e-08	4.97899322356996e-07	Up	12.3177	13.0494	14.1809	22.4239	26.9882	25.8296	FUC1	alpha-L-fucosidase 1	GO:0004560,GO:0005764,GO:0005773,GO:0006004,GO:0006516,GO:0016139,GO:0048046	alpha-L-fucosidase activity|lysosome|vacuole|fucose metabolic process|glycoprotein catabolic process|glycoside catabolic process|apoplast	path:mdm00511	Other glycan degradation
LOC103407815	190.446647818893	296.472517984064	84.420777653722	0.284750769574736	-1.81222835388407	1.12751760291534e-12	4.37573431171563e-11	Down	8.76162	9.03927	9.82402	2.28637	1.91792	2.0727		uncharacterized protein C227.17c-like
LOC103407821	39.7618963987782	21.9375733653391	57.5862194322173	2.6250040728389	1.39231966120159	0.00487955849718699	0.0254467351742131	Up	0.232631	0.363599	0.227924	0.507722	0.678494	1.11925	XA21	putative receptor-like protein kinase At3g47110	GO:0004674,GO:0005524,GO:0005634,GO:0005789,GO:0005886,GO:0006952,GO:0016021,GO:0032541,GO:1990578	protein serine/threonine kinase activity|ATP binding|nucleus|endoplasmic reticulum membrane|plasma membrane|defense response|integral component of membrane|cortical endoplasmic reticulum|perinuclear endoplasmic reticulum membrane	path:mdm04016,path:mdm04626	MAPK signaling pathway - plant|Plant-pathogen interaction
LOC103407843	83.9664289534378	45.7369912526182	122.195866654257	2.67170758958182	1.41776211778765	7.10769899975844e-06	9.00184333783299e-05	Up	2.54839	2.00088	1.83382	4.44074	5.4045	5.24159	CML13	probable calcium-binding protein CML13	GO:0005509,GO:0005634,GO:0005737,GO:0005829,GO:0005886,GO:0019722	calcium ion binding|nucleus|cytoplasm|cytosol|plasma membrane|calcium-mediated signaling	path:mdm04626	Plant-pathogen interaction
LOC103407844	66.4838489955685	0	132.967697991137	Inf	Inf	2.82722253532947e-08	5.76379615324904e-07	Up	0	0	0	8.0669	6.17966	1.64358		uncharacterized LOC103407844
LOC103407849	384.931553415285	583.003682634681	186.85942419589	0.320511567528088	-1.64155166904411	1.14439830769298e-13	5.10401645231071e-12	Down	38.376	26.249	31.5328	8.5124	9.33941	6.90943	At4g10100	molybdopterin synthase sulfur carrier subunit-like	GO:0000166,GO:0005829,GO:0006777,GO:0009734,GO:0018315,GO:0019008,GO:0030366	nucleotide binding|cytosol|Mo-molybdopterin cofactor biosynthetic process|auxin-activated signaling pathway|molybdenum incorporation into molybdenum-molybdopterin complex|molybdopterin synthase complex|molybdopterin synthase activity	path:mdm04122	Sulfur relay system
LOC103407850	57.89502529112	32.1800637905976	83.6099867916424	2.59819207742129	1.37750808933081	0.000133925927734028	0.00121366447171287	Up	0.849626	0.785552	0.813657	2.32221	1.3836	2.32177		uncharacterized LOC103407850
LOC103407929	901.397865528149	597.896363509578	1204.89936754672	2.01523113549999	1.01094531712347	3.15877221737324e-07	5.36769088989744e-06	Up	14.3351	12.8804	11.266	20.7708	23.4788	23.9626	XYLT	beta-1,2-xylosyltransferase-like	GO:0000139,GO:0005794,GO:0005797,GO:0006487,GO:0016021,GO:0031204,GO:0032580,GO:0042285,GO:0050513	Golgi membrane|Golgi apparatus|Golgi medial cisterna|protein N-linked glycosylation|integral component of membrane|posttranslational protein targeting to membrane, translocation|Golgi cisterna membrane|xylosyltransferase activity|glycoprotein 2-beta-D-xylosyltransferase activity	path:mdm00513	Various types of N-glycan biosynthesis
LOC103407948	12.7327298567595	21.7009078532689	3.76455186024997	0.173474394974812	-2.52720535985869	0.000844628535416798	0.0058747075915866	Down	1.16241	0.859504	0.888852	0.191612	0.0878812	0.0493834	PPD6	psbP domain-containing protein 6, chloroplastic	GO:0005509,GO:0009507,GO:0009534,GO:0009543,GO:0009570,GO:0009579,GO:0009654,GO:0015979,GO:0019898,GO:0031977	calcium ion binding|chloroplast|chloroplast thylakoid|chloroplast thylakoid lumen|chloroplast stroma|thylakoid|photosystem II oxygen evolving complex|photosynthesis|extrinsic component of membrane|thylakoid lumen
LOC103407991	873.775066609983	1325.90683412262	421.64329909735	0.318003715077282	-1.65288447499954	1.2827965058408e-06	1.92088175125644e-05	Down	47.2425	31.2169	30.9819	8.01672	11.8566	10.7196	NAC072	NAC domain-containing protein 72-like	GO:0003677,GO:0003700,GO:0005634,GO:0045893	DNA binding|DNA-binding transcription factor activity|nucleus|positive regulation of transcription, DNA-templated
LOC103407997	10.2269700463581	15.2617768274434	5.19216326527288	0.340206997126079	-1.55551528129558	0.0487986769014872	0.156994078723129	Down	0.955969	1.28168	0.746053	0.30759	0.341897	0.255524		uncharacterized LOC103407997
LOC103408027	34.087376304264	7.98221444655349	60.1925381619746	7.54083200407678	2.91472370942698	1.8976760501386e-09	4.75896441985449e-08	Up	0.0573579	0.0369215	0.128235	0.810885	0.590835	0.821984	At1g56140	probable LRR receptor-like serine/threonine-protein kinase At1g56140
LOC103408028	6.27537033807106	0.69063222031352	11.8601084558286	17.1728281811766	4.10205575024121	0.000813266468894205	0.00569207989696837	Up	0	0	0.139043	0.25721	0.639491	1.10479	At5g45160	protein ROOT HAIR DEFECTIVE 3-like	GO:0003924,GO:0005525,GO:0005737,GO:0005783,GO:0005789,GO:0007029,GO:0016021,GO:0016320,GO:0048309	GTPase activity|GTP binding|cytoplasm|endoplasmic reticulum|endoplasmic reticulum membrane|endoplasmic reticulum organization|integral component of membrane|endoplasmic reticulum membrane fusion|endoplasmic reticulum inheritance
LOC103408057	936.764434484908	594.715560741474	1278.81330822834	2.15029401052489	1.10453393354804	0.000668278928350644	0.00480253002798344	Up	10.8563	11.0067	6.83859	14.1894	18.4367	23.3178	TPS1	alpha,alpha-trehalose-phosphate synthase [UDP-forming] 1-like	GO:0003825,GO:0005576,GO:0005618,GO:0005737,GO:0005773,GO:0005991,GO:0005992,GO:0009793,GO:0009832,GO:0010182,GO:0051301,GO:0070413	alpha,alpha-trehalose-phosphate synthase (UDP-forming) activity|extracellular region|cell wall|cytoplasm|vacuole|trehalose metabolic process|trehalose biosynthetic process|embryo development ending in seed dormancy|plant-type cell wall biogenesis|sugar mediated signaling pathway|cell division|trehalose metabolism in response to stress	path:mdm00500	Starch and sucrose metabolism
LOC103408069	16.4494814608406	29.3752294556503	3.52373346603081	0.119955946943353	-3.05942341234557	9.49099748678821e-06	0.00011609452200084	Down	0.346425	0.39714	0.433561	0.0536545	0.0120914	0.0541027	B120	G-type lectin S-receptor-like serine/threonine-protein kinase B120
LOC103408080	1584.32335618276	2823.95525271456	344.691459650969	0.122059816393914	-3.03433976950752	1.12770496251696e-43	3.80141475155428e-41	Down	79.6302	98.8216	84.1422	8.83964	7.59331	7.3982	GGH2	gamma-glutamyl hydrolase 2-like	GO:0005615,GO:0005618,GO:0005773,GO:0008242,GO:0034722,GO:0046900	extracellular space|cell wall|vacuole|omega peptidase activity|gamma-glutamyl-peptidase activity|tetrahydrofolylpolyglutamate metabolic process	path:mdm00790	Folate biosynthesis
LOC103408100	592.550657168232	797.400137491679	387.701176844786	0.486206558810421	-1.04035873977772	3.01690700631581e-07	5.14168924827132e-06	Down	28.5632	23.0596	22.9633	10.1822	9.64665	12.8848	NHX2	sodium/hydrogen exchanger 2-like	GO:0005774,GO:0005886,GO:0009651,GO:0010107,GO:0015385,GO:0015386,GO:0016021,GO:0051453,GO:0055075,GO:0071805,GO:0090333,GO:0098719	vacuolar membrane|plasma membrane|response to salt stress|potassium ion import|sodium:proton antiporter activity|potassium:proton antiporter activity|integral component of membrane|regulation of intracellular pH|potassium ion homeostasis|potassium ion transmembrane transport|regulation of stomatal closure|sodium ion import across plasma membrane
LOC103408102	124.487478815962	184.959391196821	64.0155664351042	0.346106061556957	-1.53071388640456	3.79688094839791e-08	7.62268550512849e-07	Down	2.22173	2.04931	2.05196	0.526083	0.403617	0.615674	LIP1	disease resistance protein RGA2-like	GO:0004806,GO:0005615,GO:0016042,GO:0016298,GO:0044255	triglyceride lipase activity|extracellular space|lipid catabolic process|lipase activity|cellular lipid metabolic process
LOC103408110	721.478820272987	318.662395906691	1124.29524463928	3.52817043705556	1.81892025555405	1.19385014017297e-12	4.60848409635347e-11	Up	5.1779	6.13733	6.71839	15.0798	21.3632	20.4108	PME51	probable pectinesterase/pectinesterase inhibitor 51	GO:0005576,GO:0005618,GO:0030599,GO:0042545,GO:0045330,GO:0045490,GO:0046910	extracellular region|cell wall|pectinesterase activity|cell wall modification|aspartyl esterase activity|pectin catabolic process|pectinesterase inhibitor activity
LOC103408145	557.798634655214	746.023817728258	369.57345158217	0.495390955087159	-1.01336056697734	6.37419445915246e-07	1.02092760978359e-05	Down	12.0714	11.4591	9.35188	4.15491	4.642	5.63017	PLIP2	phospholipase A1 PLIP2, chloroplastic-like	GO:0002213,GO:0008970,GO:0009507,GO:0009570,GO:0016042,GO:0031349,GO:0031969,GO:0047714,GO:0052739,GO:0052740,GO:0102549	defense response to insect|phospholipase A1 activity|chloroplast|chloroplast stroma|lipid catabolic process|positive regulation of defense response|chloroplast membrane|galactolipase activity|phosphatidylserine 1-acylhydrolase activity|1-acyl-2-lysophosphatidylserine acylhydrolase activity|1-18:1-2-16:0-monogalactosyldiacylglycerol lipase activity
LOC103408150	1898.81504530218	1259.46535335203	2538.16473725232	2.01527158368991	1.01097427351283	7.729570097158e-06	9.67949188408685e-05	Up	21.7782	38.7936	28.4186	46.0837	52.7824	61.0511		uncharacterized LOC103408150
LOC103408168	7.44002317549888	12.8022586026529	2.07778774834491	0.162298529723056	-2.62327816444611	0.0085454902262343	0.0401123318747624	Down	0.178952	0.29254	0.201041	0	0.0502357	0.0560969	MCM7	DNA replication licensing factor MCM7	GO:0000347,GO:0003677,GO:0003678,GO:0005524,GO:0005737,GO:0006270,GO:0007049,GO:0042555	THO complex|DNA binding|DNA helicase activity|ATP binding|cytoplasm|DNA replication initiation|cell cycle|MCM complex	path:mdm03030	DNA replication
LOC103408182	15.0582971328236	22.4120613065085	7.70453295913878	0.343767262358031	-1.54049593425572	0.0179094855524087	0.0721406122223603	Down	0.363675	0.704155	0.561983	0.118183	0.127614	0.238242		uncharacterized LOC103408182
LOC103408191	20.0923133819619	0.303063691869633	39.8815630720542	131.594658621165	7.03995712157473	0.00105893680070243	0.00711603566350565	Up	0.0262435	0	0	1.1669	1.73921	0.113882	S-ACP-DES6	stearoyl-[acyl-carrier-protein] 9-desaturase 6, chloroplastic-like	GO:0006631,GO:0006633,GO:0009570,GO:0016020,GO:0045300,GO:0046872,GO:0102786	fatty acid metabolic process|fatty acid biosynthetic process|chloroplast stroma|membrane|acyl-[acyl-carrier-protein] desaturase activity|metal ion binding|stearoyl-[acp] desaturase activity	path:mdm00061,path:mdm01040	Fatty acid biosynthesis|Biosynthesis of unsaturated fatty acids
LOC103408239	43.6274256880201	6.46453444646015	80.79031692958	12.4974687038475	3.6435640091174	7.69029944433895e-15	3.95286845552103e-13	Up	0.313046	0.436441	0.151662	4.17876	2.51129	3.01047		uncharacterized LOC103408239
LOC103408245	59.292975253234	22.5653788990334	96.0205716074347	4.25521645513108	2.08923252105378	8.57585626159929e-07	1.34313383589283e-05	Up	0	0.48468	0.905394	1.93659	0.851295	2.00128		glycine-rich cell wall structural protein 2-like
LOC103408279	1274.60442065356	546.751986176737	2002.45685513039	3.66245922421412	1.87281269745938	3.85755124240173e-21	3.49470032866331e-19	Up	75.0955	84.2346	51.4033	221.51	234.27	224.299	ARG7	auxin-induced protein 15A-like	GO:0009733	response to auxin	path:mdm04075	Plant hormone signal transduction
LOC103408282	89.3583924342501	44.1769527634256	134.539832105075	3.04547560864046	1.6066675498544	2.05414120084187e-07	3.63550387133125e-06	Up	0.434947	0.399055	0.420702	1.1442	1.17484	1.08303	4CLL5	protein ROOT PRIMORDIUM DEFECTIVE 1-like	GO:0005524,GO:0005777,GO:0009611,GO:0009695,GO:0016874	ATP binding|peroxisome|response to wounding|jasmonic acid biosynthetic process|ligase activity
LOC103408292	743.836411343797	471.624275667565	1016.04854702003	2.15436015370891	1.10725945161664	2.94363383007995e-08	5.9926927481754e-07	Up	7.93086	9.26581	8.21052	14.1061	17.9728	16.1463	At1g53420	probable leucine-rich repeat receptor-like protein kinase At5g63930
LOC103408298	85.6514470912634	141.857290488034	29.4456036944928	0.207572015461388	-2.26831613999926	0.000454061486414236	0.00345645603292483	Down	4.8016	2.54435	2.2218	0.34787	0.680989	0.671614	IRKI	IRK-interacting protein
LOC103408302	6.53362477430541	1.33901202233991	11.7282375262709	8.75887395377966	3.13074540798633	0.00380305140116652	0.0207588891206585	Up	0.074128	0	0.168474	0.932055	0.924685	0.399829		dCTP pyrophosphatase 1-like			path:mdm00240	Pyrimidine metabolism
LOC103408309	180.019092049695	49.6248554886254	310.413328610765	6.25519864096965	2.64505569954561	0.00186973234134453	0.0114740771751858	Up	1.53739	1.10794	1.16567	11.5099	5.03707	5.44937	MDH1	malate dehydrogenase [NADP], chloroplastic-like	GO:0005975,GO:0006108,GO:0009507,GO:0046554	carbohydrate metabolic process|malate metabolic process|chloroplast|malate dehydrogenase (NADP+) activity	path:mdm00620,path:mdm00710	Pyruvate metabolism|Carbon fixation in photosynthetic organisms
LOC103408330	204.926584301435	43.4997041183966	366.353464484474	8.42197600901699	3.07415876582742	2.64265941799484e-27	3.84978374510906e-25	Up	4.25023	5.62077	2.97167	28.1956	27.0981	37.3198	ARG7	auxin-induced protein 15A-like	GO:0009733	response to auxin	path:mdm04075	Plant hormone signal transduction
LOC103408332	27.646921631023	37.2886841816592	18.0051590803868	0.482858525998694	-1.05032754296429	0.0295024683848353	0.10644387784398	Down	0.051057	0.29647	0.114759	0.260811	0.574758	0.107076		uncharacterized LOC103408332
LOC103408335	160.103140524716	75.1749413240757	245.031339725357	3.25948162259333	1.70464254114978	9.67657943443994e-11	2.94358906405471e-09	Up	1.39311	1.52119	1.35254	5.11818	3.50552	6.27647	Os11g0148500	pyruvate kinase 1, cytosolic-like	GO:0000287,GO:0004743,GO:0005524,GO:0005737,GO:0005829,GO:0006096,GO:0016301,GO:0030955,GO:0032869	magnesium ion binding|pyruvate kinase activity|ATP binding|cytoplasm|cytosol|glycolytic process|kinase activity|potassium ion binding|cellular response to insulin stimulus	path:mdm00010,path:mdm00230,path:mdm00620	Glycolysis / Gluconeogenesis|Purine metabolism|Pyruvate metabolism
LOC103408366	383.67171835045	220.629827213346	546.713609487554	2.47796780876273	1.30915744557374	1.290476030046e-09	3.34025893848514e-08	Up	5.4911	5.76136	6.83841	13.3247	14.1045	12.3964	At3g57810	uncharacterized LOC103408366	GO:0009507	chloroplast
LOC103408372	277.788250840468	113.877489388763	441.699012292173	3.8787210243481	1.955581014265	0.000775629332653548	0.00547804366004702	Up	4.29184	3.1449	3.44936	18.2861	9.841	8.32027		uncharacterized LOC103408372
LOC103408381	14.4078133287186	5.78109291919426	23.0345337382429	3.98446004245394	1.99438422939652	0.00662035053327775	0.0326620631424132	Up	0.0353863	0.034228	0.0399729	0.479156	1.17475	0.563517	ELP3	elongator complex protein 3-like	GO:0002926,GO:0004402,GO:0005634,GO:0005719,GO:0005737,GO:0005829,GO:0008283,GO:0009294,GO:0010928,GO:0033588,GO:0035265,GO:0046872,GO:0051536,GO:0090708,GO:2000025	tRNA wobble base 5-methoxycarbonylmethyl-2-thiouridinylation|histone acetyltransferase activity|nucleus|nuclear euchromatin|cytoplasm|cytosol|cell proliferation|DNA mediated transformation|regulation of auxin mediated signaling pathway|Elongator holoenzyme complex|organ growth|metal ion binding|iron-sulfur cluster binding|specification of plant organ axis polarity|regulation of leaf formation
LOC103408400	260.258951418874	460.599309043591	59.9185937941567	0.13008832757169	-2.94243657564415	3.42949872048385e-31	6.41426889721464e-29	Down	9.4536	7.86206	8.41232	0.717467	0.82018	0.283793	GSTL3	glutathione S-transferase L3-like	GO:0004364,GO:0005829,GO:0009636,GO:0010731,GO:0046686	glutathione transferase activity|cytosol|response to toxic substance|protein glutathionylation|response to cadmium ion	path:mdm00480	Glutathione metabolism
LOC103408432	14.6631580650656	0	29.3263161301312	Inf	Inf	1.92210670506815e-10	5.6171243326538e-09	Up	0	0	0	0.965828	1.24288	0.497982		uncharacterized LOC103408432
LOC103408438	7.01155554230567	0.303063691869633	13.7200473927417	45.271168275227	5.50052063237942	0.000304874013667259	0.00246535499475978	Up	0.104621	0	0	0.642858	1.69236	1.11756		stress-induced protein KIN2-like
LOC103408439	635.971559523287	866.862300018981	405.080819027593	0.467295462057495	-1.09759306774015	8.80625795616903e-08	1.64070320147391e-06	Down	43.5809	47.4444	47.2349	15.7904	24.767	16.8274	RTNLB12	reticulon-like protein B12	GO:0005789,GO:0016021	endoplasmic reticulum membrane|integral component of membrane
LOC103408440	39.7972048541142	63.7599862667874	15.834423441441	0.248344210351393	-2.00958698126984	0.000146822974205082	0.00131248782676698	Down	2.79573	1.59069	2.84583	1.14313	0.105664	0.475738		uncharacterized LOC103408440
LOC103408488	168.730139908782	285.500862862166	51.9594169553974	0.181993905147959	-2.4580379585296	1.10034775259589e-15	6.20604695481613e-14	Down	4.56627	6.65661	6.0235	1.05082	0.74317	0.977999	UTP7	probable U3 small nucleolar RNA-associated protein 7	GO:0000447,GO:0000462,GO:0000472,GO:0000480,GO:0005654,GO:0005730,GO:0030688,GO:0031167,GO:0032040	endonucleolytic cleavage in ITS1 to separate SSU-rRNA from 5.8S rRNA and LSU-rRNA from tricistronic rRNA transcript (SSU-rRNA, 5.8S rRNA, LSU-rRNA)|maturation of SSU-rRNA from tricistronic rRNA transcript (SSU-rRNA, 5.8S rRNA, LSU-rRNA)|endonucleolytic cleavage to generate mature 5'-end of SSU-rRNA from (SSU-rRNA, 5.8S rRNA, LSU-rRNA)|endonucleolytic cleavage in 5'-ETS of tricistronic rRNA transc…
LOC103408512	292.152762382121	67.7397528453218	516.56577191892	7.6257404289392	2.93087742429042	2.07536218073548e-29	3.36115919662131e-27	Up	0.652975	1.08442	0.806002	6.85015	4.75107	6.91726		titin-like
LOC103408521	33.8997956721527	0	67.7995913443053	Inf	Inf	4.00502045406662e-23	4.28433737872293e-21	Up	0	0	0	1.77016	0.947236	1.11215		uncharacterized LOC103408521
LOC103408523	124.998695027863	65.5747438894189	184.422646166306	2.81240360583497	1.49180364930138	2.85501271466249e-06	3.95634888136069e-05	Up	3.62396	3.38934	4.10985	10.8472	10.2119	6.7875		uncharacterized LOC103408523
LOC103408530	20.1752376275711	31.367397396913	8.98307785822917	0.286382633042843	-1.80398408825816	0.00204351263781141	0.0123496834209199	Down	1.37041	1.18238	2.26092	0.52181	0.404919	0.302479	TEN1	CST complex subunit TEN1-like	GO:0000723,GO:0000781,GO:0003697,GO:0009408,GO:0010521,GO:0019827,GO:0032211,GO:0042162,GO:0044183,GO:0048367,GO:1990879	telomere maintenance|chromosome, telomeric region|single-stranded DNA binding|response to heat|telomerase inhibitor activity|stem cell population maintenance|negative regulation of telomere maintenance via telomerase|telomeric DNA binding|protein binding involved in protein folding|shoot system development|CST complex
LOC103408536	72.3052108075817	38.7146156167246	105.895805998439	2.73529271339819	1.45169522920484	1.18464729229647e-05	0.000141710457344207	Up	1.43329	2.07448	1.46802	3.74266	4.03013	4.04478		uncharacterized LOC103408536
LOC103408538	109.101491055112	171.997569084	46.2054130262246	0.268639918995942	-1.89625439452126	1.90235669770872e-10	5.56501722165244e-09	Down	4.27865	4.04027	4.64835	1.09184	0.880306	0.953429	DEGP14	putative protease Do-like 14	GO:0004252	serine-type endopeptidase activity
LOC103408548	33.5104099960535	45.2430806314269	21.7777393606801	0.481349613172732	-1.05484296393987	0.0191306548336167	0.0760865534791459	Down	0.487531	0.657311	0.713132	0.244078	0.320512	0.2191	KIN14S	kinesin-like protein KIN-14S	GO:0003777,GO:0005524,GO:0005871,GO:0005874,GO:0007018,GO:0008017,GO:0016887	microtubule motor activity|ATP binding|kinesin complex|microtubule|microtubule-based movement|microtubule binding|ATPase activity
LOC103408558	25.5615348660199	14.625363835361	36.4977058966788	2.49550755164362	1.31933326957866	0.0254405187505958	0.0950780763929059	Up	0.311351	0.366378	0.88658	0.780772	1.35349	0.941219	At1g54790	GDSL esterase/lipase At1g54790-like	GO:0005576,GO:0016042,GO:0016788	extracellular region|lipid catabolic process|hydrolase activity, acting on ester bonds
LOC103408598	15.0550986430091	5.25710883128407	24.853088454734	4.72752024969275	2.2410836377771	0.00104590583013163	0.00704316144379003	Up	0.125281	0.217195	0.0842025	0.646934	0.400517	0.761849	PCMP-H80	pentatricopeptide repeat-containing protein At3g56550-like
LOC103408627	3.36747549462076	6.73495098924152	0	0	-Inf	0.00550115970621566	0.0281465972261193	Down	0.0947977	0.0463884	0.121202	0	0	0	HIPP32	heavy metal-associated isoprenylated plant protein 34-like	GO:0005618,GO:0030001,GO:0046872	cell wall|metal ion transport|metal ion binding
LOC103408632	10.5325898785057	4.6183873338626	16.4467924231488	3.56115484350107	1.83234516726356	0.0227381014064461	0.0871351698311793	Up	0.134139	0.0801559	0.0373122	0.31094	0.155512	0.311936	RLP54	receptor like protein 22-like	GO:0005886,GO:0016021	plasma membrane|integral component of membrane
LOC103408644	144.253869058479	94.9863033868686	193.521434730089	2.03736147033639	1.02670196714587	0.00357285925183469	0.0196727805718305	Up	4.51232	1.67112	3.37282	2.58226	2.42805	2.23485		basic proline-rich protein-like
LOC103408674	8.2525263457445	14.083273090676	2.421779600813	0.171961417294135	-2.53984318881154	0.0147554181837033	0.0620480959015896	Down	0.739687	0.134899	0.710704	0.182338	0.0659821	0	LTL1	GDSL esterase/lipase LTL1-like	GO:0005576,GO:0009751,GO:0010226,GO:0016042,GO:0016788,GO:0042538	extracellular region|response to salicylic acid|response to lithium ion|lipid catabolic process|hydrolase activity, acting on ester bonds|hyperosmotic salinity response
LOC103408692	24.0289992527677	38.9476619289274	9.11033657660807	0.233912284471218	-2.09596046457658	9.18356772276021e-05	0.000874611131021086	Down	2.62342	2.60506	2.33101	0.921273	0.231356	0.323331	PSAL	photosystem I reaction center subunit XI, chloroplastic-like	GO:0009507,GO:0009534,GO:0009535,GO:0009538,GO:0009579,GO:0009941,GO:0010287,GO:0015979,GO:0016020,GO:0016021,GO:0019904,GO:0031969	chloroplast|chloroplast thylakoid|chloroplast thylakoid membrane|photosystem I reaction center|thylakoid|chloroplast envelope|plastoglobule|photosynthesis|membrane|integral component of membrane|protein domain specific binding|chloroplast membrane	path:mdm00195	Photosynthesis
LOC103408707	2.8235459679396	5.64709193587919	0	0	-Inf	0.0127774561306738	0.0552533492285553	Down	0.0581872	0.0279488	0.0326465	0	0	0		cysteine synthase-like	GO:0004124,GO:0005737,GO:0006535,GO:0047458,GO:0050234,GO:0050461	cysteine synthase activity|cytoplasm|cysteine biosynthetic process from serine|beta-pyrazolylalanine synthase activity|pyrazolylalanine synthase activity|L-mimosine synthase activity	path:mdm00270,path:mdm00920	Cysteine and methionine metabolism|Sulfur metabolism
LOC103408736	45.3039067407478	60.8091311031749	29.7986823783208	0.490036312601825	-1.02903943531359	0.00783490860925021	0.037451238857903	Down	2.67838	1.91486	2.22043	1.34901	0.579972	1.2985		uncharacterized LOC103408736
LOC103408739	7.39812785050234	13.0521539125082	1.7441017884965	0.133625591621708	-2.90373175945561	0.0251766333504061	0.0943022280391887	Down	0.575038	0.0836478	0.423063	0	0.0543761	0.0915306	PUB33	U-box domain-containing protein 35
LOC103408740	762.424476945905	1018.77420079179	506.074753100019	0.496748693387306	-1.00941192217061	3.48522794918246e-06	4.74035076790037e-05	Down	15.6875	20.7847	20.6373	10.7544	7.03249	7.62956	OPT3	oligopeptide transporter 3	GO:0005886,GO:0006875,GO:0007275,GO:0009506,GO:0015031,GO:0016020,GO:0016021,GO:0046915,GO:0055072,GO:1990388	plasma membrane|cellular metal ion homeostasis|multicellular organism development|plasmodesma|protein transport|membrane|integral component of membrane|transition metal ion transmembrane transporter activity|iron ion homeostasis|xylem-to-phloem iron transport
LOC103408753	6.0539310067673	10.3970126414996	1.71084937203503	0.164552014220526	-2.60338440881903	0.0232282562626939	0.0885802616489735	Down	0.189208	0.306189	0.429294	0.0664269	0.180646	0.0673522		cysteine proteinase inhibitor 1-like	GO:0004869,GO:0005576,GO:0006952	cysteine-type endopeptidase inhibitor activity|extracellular region|defense response
LOC103408778	16.389309018984	26.4592769110592	6.31934112690884	0.238832722003356	-2.06592758392161	0.00477141081164727	0.0249906412700369	Down	0.376915	0.758782	0.91475	0.162466	0.117964	0.298431	PER42	peroxidase 42-like	GO:0004601,GO:0005576,GO:0006979,GO:0009505,GO:0009506,GO:0020037,GO:0042744,GO:0046872,GO:0048511	peroxidase activity|extracellular region|response to oxidative stress|plant-type cell wall|plasmodesma|heme binding|hydrogen peroxide catabolic process|metal ion binding|rhythmic process	path:mdm00940	Phenylpropanoid biosynthesis
LOC103408797	236.091428493426	155.413889080181	316.768967906672	2.03822817755526	1.02731556877578	1.19441401590058e-05	0.000142729028528267	Up	3.94109	4.87593	4.20012	7.91919	8.78756	7.40729	At2g42730	putative F-box/LRR-repeat protein At5g02700
LOC103408813	58.8024994085235	87.9323791547908	29.6726196622561	0.33744816127427	-1.56726220225474	0.000800911987298677	0.00562462173250694	Down	0.829045	0.469308	0.884235	0.118574	0.147674	0.420899	At1g12390	uncharacterized LOC103408813	GO:0016021,GO:0016192	integral component of membrane|vesicle-mediated transport
LOC103408838	314.986004254079	432.477329114584	197.494679393575	0.456659034123032	-1.13081072036354	3.78751824881901e-07	6.31761530686208e-06	Down	10.1005	9.11581	9.31072	4.00278	3.00789	4.83966	SPP1	sucrose-phosphatase 1-like	GO:0000287,GO:0005986,GO:0050307	magnesium ion binding|sucrose biosynthetic process|sucrose-phosphate phosphatase activity	path:mdm00500	Starch and sucrose metabolism
LOC103408856	44.8938237049205	62.8074388912684	26.9802085185726	0.429570270573848	-1.21903394323027	0.00206826842759671	0.0124577398121813	Down	4.7894	4.73197	3.22791	1.73106	2.4641	1.42137	PSRP5	50S ribosomal protein 5, chloroplastic-like	GO:0005840,GO:0009507	ribosome|chloroplast
LOC103408883	18.3650166703078	8.38190889115958	28.3481244494561	3.38206067586286	1.75790254265186	0.0334143650185302	0.117306787542204	Up	0.323838	0.119763	0.0836792	0.774248	0.278691	0.285503	At1g07650	probable LRR receptor-like serine/threonine-protein kinase At1g07650
LOC103408906	41.5405221070968	16.3592411500046	66.7218030641891	4.07853900143593	2.02805244806499	1.12174014348225e-06	1.70436303771228e-05	Up	0.940443	0.768007	1.2207	3.06208	3.18337	3.71578	SD25	G-type lectin S-receptor-like serine/threonine-protein kinase SD2-5
LOC103408917	1414.1466535085	910.819824297521	1917.47348271949	2.10521711491991	1.0739690287623	1.55714160553594e-06	2.29727914221308e-05	Up	22.2372	17.3403	25.0343	34.104	23.0733	29.5585	AMI1	amidase 1-like	GO:0004040,GO:0005654,GO:0005737,GO:0005829,GO:0009684,GO:0009851,GO:0016810,GO:0043864	amidase activity|nucleoplasm|cytoplasm|cytosol|indoleacetic acid biosynthetic process|auxin biosynthetic process|hydrolase activity, acting on carbon-nitrogen (but not peptide) bonds|indoleacetamide hydrolase activity	path:mdm00330,path:mdm00360,path:mdm00380	Arginine and proline metabolism|Phenylalanine metabolism|Tryptophan metabolism
LOC103408972	257.570500328146	346.308635564125	168.832365092167	0.487519939597072	-1.03646686849788	7.95051310894296e-06	9.93471444087313e-05	Down	12.5963	12.5069	14.5556	5.39403	5.29447	6.24437		uncharacterized LOC103408972
LOC103408979	109.334970300105	153.215134422285	65.4548061779238	0.427208489714338	-1.2269877775738	2.49306687219959e-05	0.000277230566264159	Down	1.63668	1.36577	1.47643	0.481485	0.736086	0.340359	XBAT33	uncharacterized LOC103408979	GO:0004842,GO:0016567,GO:0046872	ubiquitin-protein transferase activity|protein ubiquitination|metal ion binding
LOC103408991	9.64931104163782	0	19.2986220832756	Inf	Inf	9.92660566881188e-08	1.83528251491618e-06	Up	0	0	0	0.428304	0.445809	0.283802		uncharacterized LOC103408991
LOC103409007	835.381112945049	1153.03792259974	517.724303290354	0.449008912146658	-1.15518401432587	9.12640738161353e-06	0.000112060376955941	Down	14.3085	22.3064	19.8889	7.05968	7.03269	8.08204	At4g19900	uncharacterized protein At4g19900-like
LOC103409035	248.216427844209	365.242466547024	131.190389141394	0.359187118578129	-1.47719248282802	4.78910914557158e-05	0.000497621054229821	Down	20.1789	10.3311	12.3884	4.71271	4.96384	4.46021	NAC074	protein SOMBRERO-like	GO:0003677,GO:0005634,GO:0006355	DNA binding|nucleus|regulation of transcription, DNA-templated
LOC103409051	65.9697746547569	101.030781262015	30.9087680474991	0.305934168393095	-1.70870685095814	0.0367203335950042	0.126232950423239	Down	7.54376	2.5059	3.06083	1.25153	1.741	0.634554	TIC20-IV	protein TIC 20-IV, chloroplastic-like	GO:0005739,GO:0009507,GO:0009706,GO:0016021,GO:0045037	mitochondrion|chloroplast|chloroplast inner membrane|integral component of membrane|protein import into chloroplast stroma
LOC103409080	22.5504207833836	44.7419316105007	0.358909956266557	0.00802178053891448	-6.96186178743895	9.64152715057293e-08	1.78599279293999e-06	Down	1.12387	0.387938	1.127	0	0	0.01897	EIX2	probable LRR receptor-like serine/threonine-protein kinase At4g36180	GO:0005886,GO:0016021,GO:0050832	plasma membrane|integral component of membrane|defense response to fungus
LOC103409099	40.5813643119416	77.6561907342273	3.50653788965599	0.0451546471247459	-4.46898171837379	2.02003974933192e-17	1.37145087431224e-15	Down	1.50566	1.37876	1.25115	0.0939535	0.0425442	0.0711907	CNGC20	probable cyclic nucleotide-gated ion channel 20, chloroplastic	GO:0005216,GO:0005516,GO:0009535,GO:0009624,GO:0016021,GO:0030552,GO:0030553	ion channel activity|calmodulin binding|chloroplast thylakoid membrane|response to nematode|integral component of membrane|cAMP binding|cGMP binding	path:mdm04626	Plant-pathogen interaction
LOC103409141	5.21482989529392	10.4296597905878	0	0	-Inf	0.000255596127133435	0.002114649465068	Down	0.259159	0.53712	0.455981	0	0	0	CXE12	probable carboxylesterase 12	GO:0005737,GO:0005829,GO:0052689	cytoplasm|cytosol|carboxylic ester hydrolase activity
LOC103409144	3443.55034052646	692.34989039587	6194.75079065705	8.94742799354678	3.16147302827329	4.01330202684481e-28	6.18859711479953e-26	Up	21.5484	23.4902	30.7808	242.266	207.593	167.75	COS-1	legumin B-like	GO:0045735	nutrient reservoir activity
LOC103409147	400.143745102648	210.488743657721	589.798746547575	2.80204412026259	1.48647967225086	6.38946733404086e-12	2.2896249445469e-10	Up	3.56506	3.81762	4.60465	10.2718	9.64118	10.7978	MUR3	xyloglucan galactosyltransferase MUR3-like	GO:0005768,GO:0005794,GO:0005802,GO:0006486,GO:0009826,GO:0009863,GO:0009969,GO:0010256,GO:0016757,GO:0030173,GO:0032580,GO:0042353	endosome|Golgi apparatus|trans-Golgi network|protein glycosylation|unidimensional cell growth|salicylic acid mediated signaling pathway|xyloglucan biosynthetic process|endomembrane system organization|transferase activity, transferring glycosyl groups|integral component of Golgi membrane|Golgi cisterna membrane|fucose biosynthetic process
LOC103409182	25.2328017249584	1.59740871977119	48.8681947301456	30.592167255194	4.93509041092259	0.0153888660592987	0.0641165891145544	Up	0.0503228	0	0.0564226	0.65224	1.97804	0.292116	NAC043	NAC domain-containing protein 43-like	GO:0003677,GO:0003700,GO:0005634,GO:0009834,GO:0010047,GO:0045893	DNA binding|DNA-binding transcription factor activity|nucleus|plant-type secondary cell wall biogenesis|fruit dehiscence|positive regulation of transcription, DNA-templated
LOC103409199	12.8153079061695	1.5503271491816	24.0802886631575	15.5323917767093	3.95720809709878	2.55871475712123e-06	3.57997783826952e-05	Up	0.0163391	0.0469976	0.0182015	0.318674	0.503747	0.255229	MIK2	MDIS1-interacting receptor like kinase 2-like
LOC103409239	425.178513400836	642.450462142532	207.906564659141	0.32361493517459	-1.62764990366736	1.10882805505873e-05	0.000133547674765902	Down	8.89154	5.88485	5.59364	1.64573	1.67477	2.35131	N	disease resistance protein TAO1-like	GO:0005524,GO:0005737,GO:0007165,GO:0009626,GO:0043531	ATP binding|cytoplasm|signal transduction|plant-type hypersensitive response|ADP binding
LOC103409241	61.1794262640868	30.8459339559662	91.5129185722074	2.96677412014322	1.56889508921979	1.22860913653237e-05	0.000146392843682998	Up	0.663023	0.542676	0.389722	1.45809	1.053	1.62875	CRSP	CO(2)-response secreted protease-like	GO:0004252,GO:0005618,GO:0006508,GO:0008236,GO:0010037,GO:0048046,GO:1900425,GO:2000038,GO:2000122	serine-type endopeptidase activity|cell wall|proteolysis|serine-type peptidase activity|response to carbon dioxide|apoplast|negative regulation of defense response to bacterium|regulation of stomatal complex development|negative regulation of stomatal complex development
LOC103409248	2.46314008901735	4.92628017803469	0	0	-Inf	0.0268508815864452	0.099021378602092	Down	0.131068	0.0224559	0.0204472	0	0	0	At4g27190	probable disease resistance protein At4g27220
LOC103409265	32.2131931164467	0.34531611015676	64.0810701227366	185.572199610514	7.53583678769642	4.58145292865886e-07	7.54209655887679e-06	Up	0	0	0.0384738	0.853602	2.21329	3.16181	TBL19	protein trichome birefringence-like 19	GO:0005794,GO:0016021,GO:0016413	Golgi apparatus|integral component of membrane|O-acetyltransferase activity
LOC103409272	369.585394234177	109.772477734082	629.398310734273	5.7336622414496	2.51945692080832	0.000320953523087878	0.00257526782018201	Up	4.82982	7.18088	4.65132	16.4537	42.6983	28.638	XTH22	xyloglucan endotransglucosylase/hydrolase protein 22-like	GO:0004553,GO:0005618,GO:0005794,GO:0009408,GO:0009409,GO:0009612,GO:0009664,GO:0009733,GO:0009741,GO:0010411,GO:0016762,GO:0042546,GO:0048046	hydrolase activity, hydrolyzing O-glycosyl compounds|cell wall|Golgi apparatus|response to heat|response to cold|response to mechanical stimulus|plant-type cell wall organization|response to auxin|response to brassinosteroid|xyloglucan metabolic process|xyloglucan:xyloglucosyl transferase activity|cell wall biogenesis|apoplast	path:mdm04075	Plant hormone signal transduction
LOC103409319	433.143056325162	579.312640739889	286.973471910435	0.495368910893982	-1.0134247662839	1.62273058617806e-06	2.38675594588036e-05	Down	16.1839	14.6178	13.6294	6.43196	5.56205	6.88995	DET1	light-mediated development protein DET1	GO:0003824,GO:0005634,GO:0009585	catalytic activity|nucleus|red, far-red light phototransduction	path:mdm04120	Ubiquitin mediated proteolysis
LOC103409336	3.95280517343664	0.645965225875163	7.25964512099811	11.238445709152	3.4903706177458	0.0463143868189259	0.151007688148604	Up	0	0.0140063	0	0	0.148882	0.135598		uncharacterized LOC103409336
LOC103409391	54.4052416732704	33.77988708652	75.0305962600207	2.22116184307679	1.15131451746731	0.00163740134434909	0.0102478983101641	Up	1.33576	1.37105	1.26523	2.64073	2.1673	3.70868		diacylglycerol kinase theta-like
LOC103409397	102.854758152321	35.394192510631	170.315323794011	4.81195675654572	2.26662367755194	0.000106973249358406	0.000996835261620119	Up	0.206078	1.80043	0.695669	3.59352	5.35226	3.39971	ADH1	alcohol dehydrogenase 1-like	GO:0004022,GO:0005737,GO:0008270	alcohol dehydrogenase (NAD) activity|cytoplasm|zinc ion binding	path:mdm00010,path:mdm00071,path:mdm00350,path:mdm00592	Glycolysis / Gluconeogenesis|Fatty acid degradation|Tyrosine metabolism|alpha-Linolenic acid metabolism
LOC103409404	50.8090204836226	82.0741258695693	19.5439150976759	0.238125169054309	-2.07020797805578	1.21128176677256e-06	1.8249157792619e-05	Down	2.01959	2.18979	2.15764	1.07039	0.142508	0.106669	GAPB	glyceraldehyde-3-phosphate dehydrogenase B, chloroplastic	GO:0006006,GO:0009507,GO:0019253,GO:0047100,GO:0050661,GO:0051287	glucose metabolic process|chloroplast|reductive pentose-phosphate cycle|glyceraldehyde-3-phosphate dehydrogenase (NADP+) (phosphorylating) activity|NADP binding|NAD binding	path:mdm00710	Carbon fixation in photosynthetic organisms
LOC103409407	117.278746911122	15.3365703240066	219.220923498237	14.2939991710589	3.83733770460819	1.78144336247202e-09	4.49861002422159e-08	Up	0.0992824	0.440915	0.42545	3.00251	3.49346	5.69619	OLE9	glucan endo-1,3-beta-D-glucosidase-like	GO:0005576,GO:0006076,GO:0042803,GO:0042973	extracellular region|(1->3)-beta-D-glucan catabolic process|protein homodimerization activity|glucan endo-1,3-beta-D-glucosidase activity
LOC103409417	18.8260952430049	4.919036449581	32.7331540364289	6.65438330696188	2.73430497098872	0.000180754085091805	0.00157807115653549	Up	0.159353	0.115179	0.0445135	0.367836	0.765058	0.544429	CYP707A2	abscisic acid 8'-hydroxylase CYP707A2-like	GO:0004497,GO:0005506,GO:0009687,GO:0016125,GO:0016705,GO:0020037,GO:0055114	monooxygenase activity|iron ion binding|abscisic acid metabolic process|sterol metabolic process|oxidoreductase activity, acting on paired donors, with incorporation or reduction of molecular oxygen|heme binding|oxidation-reduction process	path:mdm00906	Carotenoid biosynthesis
LOC103409419	102.497284788541	47.8064203020015	157.18814927508	3.28801337314309	1.71721616682008	0.00262214705962799	0.0151698350146908	Up	0.725159	0.611935	0.792374	1.29626	3.00662	2.27343	ROPGEF14	rop guanine nucleotide exchange factor 14	GO:0005089,GO:0005886,GO:0080092	Rho guanyl-nucleotide exchange factor activity|plasma membrane|regulation of pollen tube growth
LOC103409428	57.997088859007	80.5721432788184	35.4220344391957	0.439631279468617	-1.18563405817062	0.000896183133173934	0.00616817403388233	Down	2.02812	1.3201	1.78554	0.862526	0.57433	0.613656	At1g31830	probable polyamine transporter At1g31830	GO:0005886,GO:0015203,GO:0015293,GO:0015846,GO:0016021	plasma membrane|polyamine transmembrane transporter activity|symporter activity|polyamine transport|integral component of membrane
LOC103409441	54.7538653489872	26.8493660864665	82.658364611508	3.07859650560511	1.62227279381715	1.20156809359288e-05	0.000143347568038097	Up	0.299048	0.527574	0.307219	1.12228	1.17323	0.792399	RPM1	disease resistance protein RPM1-like			path:mdm04626	Plant-pathogen interaction
LOC103409459	32.8218752704606	19.7158245342418	45.9279260066794	2.32949557483196	1.2200175898694	0.00528876376438068	0.027242583782764	Up	0.0462126	0.176987	0.20592	0.238561	0.128893	0.19074		uncharacterized LOC103409459
LOC103409460	152.079916115433	244.421268738391	59.7385634924741	0.24440820473939	-2.03263537790525	5.66553966406754e-14	2.61535023664519e-12	Down	8.12661	8.46732	6.4562	1.18997	1.82777	2.01056	GmSGT3	soyasaponin III rhamnosyltransferase-like	GO:0008194,GO:0043231,GO:0080043,GO:0080044,GO:0102241	UDP-glycosyltransferase activity|intracellular membrane-bounded organelle|quercetin 3-O-glucosyltransferase activity|quercetin 7-O-glucosyltransferase activity|soyasaponin III rhamnosyltransferase activity
LOC103409483	19.9159961354514	37.4274082464646	2.40458402443818	0.0642466079564916	-3.96023590377221	9.10041951410987e-08	1.69224606615808e-06	Down	0.241916	0.390415	0.518596	0.0119844	0.021683	0	CMT2	DNA (cytosine-5)-methyltransferase CMT2	GO:0003677,GO:0003682,GO:0003886,GO:0005634,GO:0006325,GO:0010216,GO:0010424,GO:0010426,GO:0034605	DNA binding|chromatin binding|DNA (cytosine-5-)-methyltransferase activity|nucleus|chromatin organization|maintenance of DNA methylation|DNA methylation on cytosine within a CG sequence|DNA methylation on cytosine within a CHH sequence|cellular response to heat	path:mdm00270	Cysteine and methionine metabolism
LOC103409518	4.26843691892426	8.2031878780001	0.333685959848413	0.04067759568732	-4.61962178079783	0.00602759439778883	0.0303526075372413	Down	0.434839	0.211187	0.245649	0	0.0344615	0	ZAT9	zinc finger protein ZAT4-like	GO:0003700,GO:0005634,GO:0006355,GO:0044212,GO:0046872	DNA-binding transcription factor activity|nucleus|regulation of transcription, DNA-templated|transcription regulatory region DNA binding|metal ion binding
LOC103409533	34.1679814122101	47.4985274578294	20.8374353665908	0.438696449802384	-1.18870506364583	0.00761130755031976	0.0365909897945935	Down	1.02188	1.1017	1.28259	0.541819	0.423411	0.373076	LRK10	rust resistance kinase Lr10-like	GO:0004674,GO:0005524,GO:0005886,GO:0016021	protein serine/threonine kinase activity|ATP binding|plasma membrane|integral component of membrane
LOC103409535	45.6310123744276	75.5949448599836	15.6670798888715	0.207250364662478	-2.27055345470416	5.95953886105587e-05	0.000601137896945058	Down	2.64217	3.81708	5.52497	0.274545	0.494932	0.552379	LRK10L-1.2	uncharacterized LOC103409535
LOC103409572	24.0023470211563	1.59740871977119	46.4072853225414	29.0516038557676	4.86054590777327	1.01766951107358e-12	3.96535472123967e-11	Up	0	0.0279327	0.0649711	0.781647	1.2525	1.22294	ADH	alcohol dehydrogenase	GO:0004022,GO:0005737,GO:0008270	alcohol dehydrogenase (NAD) activity|cytoplasm|zinc ion binding	path:mdm00010,path:mdm00071,path:mdm00350,path:mdm00592	Glycolysis / Gluconeogenesis|Fatty acid degradation|Tyrosine metabolism|alpha-Linolenic acid metabolism
LOC103409595	216.30764624844	32.0483713126216	400.566921184258	12.4988230221391	3.64372034176917	1.67830726034733e-40	4.96470688545604e-38	Up	0.536755	0.535822	0.888038	7.16999	6.86652	7.85343	At4g22990	SPX domain-containing membrane protein At4g22990-like	GO:0016021,GO:0055085	integral component of membrane|transmembrane transport
LOC103409636	5.81258576480581	10.5564700808553	1.06870144875635	0.101236629343979	-3.30419671580774	0.00583785503488652	0.0295666347766178	Down	1.15911	2.24472	0.873988	0.136499	0	0.27267	ACP1	acyl carrier protein 1, chloroplastic-like	GO:0006633,GO:0009507,GO:0031177	fatty acid biosynthetic process|chloroplast|phosphopantetheine binding
LOC103409678	5.46115916289005	1.50807473089448	9.41424359488563	6.24255774732185	2.64213726199082	0.0274414957671759	0.100750881749041	Up	0.0430961	0.0623575	0	0.0670794	0.200677	0.313582	NPF7.3	protein NRT1/ PTR FAMILY 7.3-like	GO:0005886,GO:0010150,GO:0010167,GO:0015112,GO:0015293,GO:0015386,GO:0015706,GO:0016021,GO:0055075,GO:1902600	plasma membrane|leaf senescence|response to nitrate|nitrate transmembrane transporter activity|symporter activity|potassium:proton antiporter activity|nitrate transport|integral component of membrane|potassium ion homeostasis|proton transmembrane transport
LOC103409698	1331.14147577489	383.09925265088	2279.18369889889	5.94932953569587	2.5727270919452	2.485601200377e-09	6.12368800470104e-08	Up	13.3836	26.2311	6.57332	66.3633	79.7225	111.772		peptide methionine sulfoxide reductase-like	GO:0008113	peptide-methionine (S)-S-oxide reductase activity
LOC103409716	19.9582748797741	32.1994334352135	7.71711632433481	0.239666214620265	-2.06090154608046	0.000383287330067539	0.00298856904213501	Down	2.66609	1.7357	1.71505	1.03381	0	0.279721	GDH3	glycine cleavage system H protein 3, mitochondrial	GO:0005739,GO:0005960,GO:0009507,GO:0019464	mitochondrion|glycine cleavage complex|chloroplast|glycine decarboxylation via glycine cleavage system	path:mdm00260,path:mdm00630	Glycine, serine and threonine metabolism|Glyoxylate and dicarboxylate metabolism
LOC103409717	64.4464681895735	38.8958042414414	89.9971321377056	2.3138005214922	1.21026449147262	0.000490737784723694	0.00369711236464135	Up	1.18481	1.59639	0.809733	1.93939	2.98425	2.98548	rrp40	putative exosome complex component rrp40	GO:0000176,GO:0000177,GO:0000178,GO:0000467,GO:0003723,GO:0005730,GO:0034427,GO:0034475,GO:0043928,GO:0070478,GO:0070481,GO:0070651,GO:0071028,GO:0071034,GO:0071035,GO:0071038,GO:0071042,GO:0071049,GO:0071051	nuclear exosome (RNase complex)|cytoplasmic exosome (RNase complex)|exosome (RNase complex)|exonucleolytic trimming to generate mature 3'-end of 5.8S rRNA from tricistronic rRNA transcript (SSU-rRNA, 5.8S rRNA, LSU-rRNA)|RNA binding|nucleolus|nuclear-transcribed mRNA catabolic process, exonucleolytic, 3'-5'|U4 snRNA 3'-end processing|exonucleolytic nuclear-transcribed mRNA catabolic process invol…	path:mdm03018	RNA degradation
LOC103409766	655.002867455559	1059.64488446278	250.360850448334	0.236268635010928	-2.08149997263259	0.0382849573377675	0.130482120059003	Down	20.2595	3.34261	13.2644	4.23628	2.03114	1.61462	CLPB1	chaperone protein ClpB1	GO:0005524,GO:0005634,GO:0005829,GO:0009408,GO:0009570,GO:0009644,GO:0009941,GO:0019538,GO:0042542,GO:0043335,GO:0045727	ATP binding|nucleus|cytosol|response to heat|chloroplast stroma|response to high light intensity|chloroplast envelope|protein metabolic process|response to hydrogen peroxide|protein unfolding|positive regulation of translation
LOC103409771	25.6463765752229	11.433067042782	39.8596861076639	3.48635112157664	1.80171787521455	0.000552527009739699	0.00408824859937567	Up	0.516806	0.540154	0.289566	1.37895	1.24672	1.99213		universal stress protein PHOS32-like
LOC103409790	357.49165746656	498.455906345099	216.527408588021	0.434396314361478	-1.20291623224917	3.89995168723148e-08	7.80798338486469e-07	Down	13.9006	15.4712	12.1384	5.59765	5.83695	4.61446	RABA6A	ras-related protein RABA6a-like	GO:0003924,GO:0005525,GO:0005768,GO:0005886,GO:0006886,GO:0032482	GTPase activity|GTP binding|endosome|plasma membrane|intracellular protein transport|Rab protein signal transduction
LOC103409844	102.692813437963	169.676880994827	35.7087458810984	0.210451451439558	-2.24844063520872	3.94181856159091e-13	1.61860226771275e-11	Down	0.697937	0.663623	1.15023	0.147716	0.172895	0.148629	SCD1	uncharacterized LOC103409844	GO:0000911,GO:0005886,GO:0009825,GO:0010235,GO:0030136,GO:0040008,GO:0045824,GO:0080008	cytokinesis by cell plate formation|plasma membrane|multidimensional cell growth|guard mother cell cytokinesis|clathrin-coated vesicle|regulation of growth|negative regulation of innate immune response|Cul4-RING E3 ubiquitin ligase complex
LOC103409877	42.821959028657	81.8965617734388	3.74735628387515	0.0457571869041579	-4.44985783005729	7.24748446613526e-18	5.05059073733801e-16	Down	3.15938	2.52798	3.5189	0.114806	0.241086	0.0384974	At4g15970	uncharacterized protein At4g15970-like
LOC103409906	106.99282740168	37.113587697086	176.872067106274	4.76569574868025	2.25268685000042	0.000128198790089611	0.00116833792037027	Up	2.56467	1.77914	2.05895	6.22176	13.5258	8.96707		probable glutathione S-transferase	GO:0004364,GO:0009734	glutathione transferase activity|auxin-activated signaling pathway	path:mdm00480	Glutathione metabolism
LOC103409912	19.4993567691601	2.80483433494726	36.1938792033729	12.9041058690739	3.68975827483588	0.00710316562285324	0.0345504650010932	Up	0.0856401	0.0621678	0.0482416	0.447417	1.35545	0.430947	CYP705A5	cytochrome P450 705A12-like	GO:0005506,GO:0005783,GO:0009958,GO:0016020,GO:0016021,GO:0016709,GO:0020037,GO:0048364,GO:0051554,GO:0080003,GO:0080004	iron ion binding|endoplasmic reticulum|positive gravitropism|membrane|integral component of membrane|oxidoreductase activity, acting on paired donors, with incorporation or reduction of molecular oxygen, NAD(P)H as one donor, and incorporation of one atom of oxygen|heme binding|root development|flavonol metabolic process|thalianol metabolic process|thalian-diol desaturase activity
LOC103409915	2.65813164131491	5.31626328262981	0	0	-Inf	0.0167085531222255	0.0682899978871164	Down	0.302449	0.0529205	0.123237	0	0	0		anthocyanin 5-aromatic acyltransferase-like	GO:0005737,GO:0047183,GO:0102777,GO:0102815	cytoplasm|anthocyanin 5-aromatic acyltransferase activity|caffeoyl-CoA:pelargonidin-3,5-diglucoside 5-O-glucoside-6-O-hydroxycinnamoyltransferase activity|caffeoyl-CoA:delphinidin-3,5-diglucoside 5-O-glucoside-6-O-hydroxycinnamoyltransferase activity
LOC103409920	87.3944947673033	49.5041320097827	125.284857524824	2.5307959646695	1.33959120060348	1.83030233187476e-05	0.000210927801591183	Up	0.556611	0.707953	0.577606	1.55755	1.00923	1.53159	N	putative disease resistance protein At4g11170	GO:0005524,GO:0005737,GO:0007165,GO:0009626,GO:0043531	ATP binding|cytoplasm|signal transduction|plant-type hypersensitive response|ADP binding
LOC103409922	305.996018570337	200.438416185031	411.553620955643	2.05326717696534	1.03792136724369	3.11180087678654e-06	4.27743515495694e-05	Up	5.26845	4.96762	5.04927	8.57835	11.6991	9.05588		protein FRA10AC1-like
LOC103409925	34.7883773093313	12.3023672408489	57.2743873778137	4.65555825610856	2.21895417423506	3.71320252289565e-06	4.99748101851183e-05	Up	0.964739	0.549468	0.702858	2.09358	3.40099	2.50155		probable glutathione S-transferase	GO:0004364,GO:0009734	glutathione transferase activity|auxin-activated signaling pathway	path:mdm00480	Glutathione metabolism
LOC103409937	43.3605269921928	71.5539221376697	15.1671318467158	0.211967861349853	-2.23808255550476	2.06460122135967e-07	3.65178702911635e-06	Down	0.427898	0.765046	0.622731	0.0659149	0.127723	0.0285197	RGA2	disease resistance protein RGA2-like	GO:0005524,GO:0006952,GO:0043531	ATP binding|defense response|ADP binding
LOC103409987	83.6956374528966	113.501940705669	53.889334200124	0.474787777769093	-1.07464529802649	0.000607122172955175	0.00442082883351527	Down	7.75576	5.05977	7.25749	2.0856	2.92598	3.46771	MPH1	protein MAINTENANCE OF PSII UNDER HIGH LIGHT 1-like	GO:0009507,GO:0009535,GO:0009579,GO:0009735,GO:0016021,GO:0061635	chloroplast|chloroplast thylakoid membrane|thylakoid|response to cytokinin|integral component of membrane|regulation of protein complex stability
LOC103409996	4694.4710276129	2793.70149113412	6595.24056409169	2.36075349675757	1.23924740727106	1.85301529121725e-11	6.24638526655676e-10	Up	82.3769	58.0864	75.3143	163.136	141.935	140.929	ACT7	actin-7	GO:0005200,GO:0005524,GO:0005618,GO:0005730,GO:0005739,GO:0005829,GO:0005856,GO:0005886,GO:0009416,GO:0009506,GO:0009570,GO:0009611,GO:0009733,GO:0009845,GO:0009941,GO:0010053,GO:0048364,GO:0048767,GO:0051301	structural constituent of cytoskeleton|ATP binding|cell wall|nucleolus|mitochondrion|cytosol|cytoskeleton|plasma membrane|response to light stimulus|plasmodesma|chloroplast stroma|response to wounding|response to auxin|seed germination|chloroplast envelope|root epidermal cell differentiation|root development|root hair elongation|cell division
LOC103409997	2.62531983907624	0	5.25063967815249	Inf	Inf	0.0152127737398835	0.063528998951199	Up	0	0	0	0.194786	0.178479	0.30051		hevamine-A-like	GO:0000272,GO:0003796,GO:0004568,GO:0005773,GO:0006032	polysaccharide catabolic process|lysozyme activity|chitinase activity|vacuole|chitin catabolic process	path:mdm00520	Amino sugar and nucleotide sugar metabolism
LOC103409998	122.782525908646	4.69564844198316	240.869403375308	51.2963025983222	5.68078293601592	5.3570583296613e-06	6.96417582855969e-05	Up	0.142825	0.369426	0.215346	11.6271	16.9912	4.2483	ATL79	RING-H2 finger protein ATL79-like	GO:0016021,GO:0016567,GO:0016740,GO:0046872	integral component of membrane|protein ubiquitination|transferase activity|metal ion binding
LOC103410046	94.3305898966447	4.40224305471845	184.258936738571	41.8556936653184	5.38735198203574	4.31303692235912e-12	1.58272076429356e-10	Up	0.305635	0.196825	0.190658	4.48351	7.93747	4.39002		uncharacterized LOC103410046
LOC103410051	34.7535571252546	67.4281877658762	2.07892648463309	0.030831712278128	-5.01944117621134	4.53364922050034e-17	2.9735405181517e-15	Down	1.51808	1.4035	1.44822	0.0639831	0.0388698	0.0217151	CYP77A3	cytochrome P450 77A3-like	GO:0005506,GO:0016020,GO:0016709,GO:0020037	iron ion binding|membrane|oxidoreductase activity, acting on paired donors, with incorporation or reduction of molecular oxygen, NAD(P)H as one donor, and incorporation of one atom of oxygen|heme binding
LOC103410069	36.7068653342423	56.3007050619272	17.1130256065574	0.303957571894245	-1.71805813664496	7.61807346936626e-05	0.000744347657151763	Down	2.55208	2.18886	1.81442	0.557942	0.47057	0.750884	ATL52	RING-H2 finger protein ATL52-like	GO:0016021,GO:0016567,GO:0016740,GO:0046872	integral component of membrane|protein ubiquitination|transferase activity|metal ion binding
LOC103410104	3.19242938109418	6.38485876218835	0	0	-Inf	0.00638004823526472	0.0317551774381477	Down	0.291926	0.188544	0.0364626	0.0335554	0	0		uncharacterized LOC103410104
LOC103410132	61.7653349739727	39.0720046076375	84.4586653403078	2.1616158727571	1.11211017353265	0.00126665132818612	0.0082628762385499	Up	0.559418	0.832261	0.813294	1.69263	1.90789	1.47446	Os07g0301200	DEAD-box ATP-dependent RNA helicase 40-like	GO:0003723,GO:0004386,GO:0005524,GO:0005730,GO:0006364	RNA binding|helicase activity|ATP binding|nucleolus|rRNA processing
LOC103410140	41.4006829045372	2.20353610351046	80.597829705564	36.576586867428	5.19284855162587	8.02015471591659e-21	7.0885452809275e-19	Up	0.0739144	0.035486	0.0829811	2.20401	2.83407	2.23701	GAT1	GABA transporter 1-like	GO:0003333,GO:0005886,GO:0015171,GO:0015185,GO:0015812,GO:0016021	amino acid transmembrane transport|plasma membrane|amino acid transmembrane transporter activity|gamma-aminobutyric acid transmembrane transporter activity|gamma-aminobutyric acid transport|integral component of membrane
LOC103410183	80.244868043713	111.476074769101	49.0136613183247	0.439678750977248	-1.18547828396635	0.000170811777470285	0.0015032888369349	Down	2.20061	2.11684	1.55879	0.446955	0.870622	0.996683	PIP5K11	putative phosphatidylinositol 4-phosphate 5-kinase 11	GO:0005524,GO:0016308	ATP binding|1-phosphatidylinositol-4-phosphate 5-kinase activity	path:mdm00562,path:mdm04070,path:mdm04144	Inositol phosphate metabolism|Phosphatidylinositol signaling system|Endocytosis
LOC103410189	340.867618189898	148.929056199856	532.80618017994	3.57758380919931	1.83898556421259	0.000187338533095904	0.00162428621045395	Up	8.09236	3.4659	3.65574	10.4748	20.5802	16.9846	At4g01130	GDSL esterase/lipase At4g01130-like	GO:0005576,GO:0016042,GO:0016788	extracellular region|lipid catabolic process|hydrolase activity, acting on ester bonds
LOC103410198	3.58985679823561	0.303063691869633	6.87664990460158	22.6904445800775	4.50401297129248	0.0121662617501977	0.0532377250019972	Up	0.0515913	0	0	0.161211	0.544784	0.331531	BAP2	BON1-associated protein 2-like	GO:0006952,GO:0016020	defense response|membrane
LOC103410202	346.498888220933	222.014986688309	470.982789753558	2.12140088729587	1.0850172769096	0.0050446434305965	0.0261945572367889	Up	2.07486	1.26842	1.63364	1.49926	2.92877	3.12398		GRIP domain-containing protein RUD3-like
LOC103410239	682.434383630466	1089.50092057665	275.367846684284	0.252746777431393	-1.98423539727297	4.34031539144903e-14	2.02617943958305e-12	Down	18.1228	24.6428	20.4596	5.262	3.96199	4.13771	LRK10	rust resistance kinase Lr10-like	GO:0004674,GO:0005524,GO:0005886,GO:0016021	protein serine/threonine kinase activity|ATP binding|plasma membrane|integral component of membrane
LOC103410246	23.1288882919665	0.949028917744796	45.3087476661881	47.7422203043681	5.57719375698395	1.16683058015519e-13	5.18015597529846e-12	Up	0	0	0	0.640755	0.640261	1.1086	APX3	L-ascorbate peroxidase 3-like	GO:0000302,GO:0004601,GO:0005739,GO:0005773,GO:0005774,GO:0005777,GO:0005778,GO:0006979,GO:0009506,GO:0009507,GO:0009536,GO:0009735,GO:0009941,GO:0016021,GO:0016688,GO:0020037,GO:0034599,GO:0042744,GO:0046861,GO:0046872	response to reactive oxygen species|peroxidase activity|mitochondrion|vacuole|vacuolar membrane|peroxisome|peroxisomal membrane|response to oxidative stress|plasmodesma|chloroplast|plastid|response to cytokinin|chloroplast envelope|integral component of membrane|L-ascorbate peroxidase activity|heme binding|cellular response to oxidative stress|hydrogen peroxide catabolic process|glyoxysomal membr…	path:mdm00053,path:mdm00480	Ascorbate and aldarate metabolism|Glutathione metabolism
LOC103410269	56.1760473049341	82.1623082701359	30.1897863397323	0.367440825061454	-1.44441616674621	7.62578970249167e-05	0.000744850550792566	Down	2.082	1.53026	1.7607	0.40236	0.625632	0.745518	At3g47420	putative glycerol-3-phosphate transporter 1	GO:0008643,GO:0016021,GO:0022857,GO:0055062	carbohydrate transport|integral component of membrane|transmembrane transporter activity|phosphate ion homeostasis
LOC103410295	44.3647767069316	26.5450447354746	62.1845086783887	2.3426032729674	1.22811265006749	0.0353487725476325	0.122623060447034	Up	1.18256	0.824896	0.962196	0.747286	2.28807	1.9846	SWEET1	bidirectional sugar transporter SWEET1	GO:0005783,GO:0005789,GO:0005886,GO:0005887,GO:0051119,GO:0051260	endoplasmic reticulum|endoplasmic reticulum membrane|plasma membrane|integral component of plasma membrane|sugar transmembrane transporter activity|protein homooligomerization
LOC103410304	310.448074716133	434.097732007557	186.798417424708	0.430314198051272	-1.21653765264847	5.22522378534382e-08	1.02558725482138e-06	Down	12.4707	9.4303	10.8326	4.41606	3.27619	5.00695	UGT88A1	UDP-glycosyltransferase 88A1-like	GO:0005829,GO:0008194,GO:0043231,GO:0080043,GO:0080044,GO:0080045,GO:0080046	cytosol|UDP-glycosyltransferase activity|intracellular membrane-bounded organelle|quercetin 3-O-glucosyltransferase activity|quercetin 7-O-glucosyltransferase activity|quercetin 3'-O-glucosyltransferase activity|quercetin 4'-O-glucosyltransferase activity	path:mdm00941	Flavonoid biosynthesis
LOC103410311	4.96914997805845	0	9.93829995611691	Inf	Inf	0.00352872219824191	0.0194704332940679	Up	0	0	0	0.0896249	0.746745	0.418285		acidic endochitinase	GO:0000272,GO:0004568,GO:0005615,GO:0006032	polysaccharide catabolic process|chitinase activity|extracellular space|chitin catabolic process	path:mdm00520	Amino sugar and nucleotide sugar metabolism
LOC103410324	341.382048493901	491.626543023805	191.137553963997	0.388786074869725	-1.36295154795026	7.10852572762207e-10	1.90458559005327e-08	Down	13.4015	9.80512	10.4964	4.17686	3.70272	4.20847	CID11	polyadenylate-binding protein-interacting protein 11-like	GO:0003723,GO:0005634	RNA binding|nucleus
LOC103410335	167.92700669863	230.064957715877	105.789055681382	0.459822550690349	-1.12085087421761	8.92175140782732e-06	0.000110013429737522	Down	2.85354	2.50081	2.52227	1.24311	0.648131	1.18658	msh3	endonuclease MutS2	GO:0005524,GO:0005634,GO:0006298,GO:0030983	ATP binding|nucleus|mismatch repair|mismatched DNA binding
LOC103410338	134.025464325203	206.058066700686	61.9928619497199	0.300851419904706	-1.73287692912959	6.20406628125409e-05	0.000622769672761621	Down	6.97521	4.2348	3.86684	1.48383	1.16457	1.32353	At1g18000	UNC93-like protein 1	GO:0016021	integral component of membrane
LOC103410357	19.9869401645197	1.33659744618868	38.6372828828507	28.9071949022685	4.85335671418549	1.72801343358552e-07	3.09229070615088e-06	Up	0	0.0123702	0.0431013	0.466641	0.228845	0.605537	CYP71D10	uncharacterized LOC103410357	GO:0005506,GO:0016020,GO:0016709,GO:0020037	iron ion binding|membrane|oxidoreductase activity, acting on paired donors, with incorporation or reduction of molecular oxygen, NAD(P)H as one donor, and incorporation of one atom of oxygen|heme binding
LOC103410410	285.335239991742	399.314427011405	171.356052972078	0.42912562477284	-1.22052804225386	6.71170775910781e-08	1.28515460988465e-06	Down	6.37309	6.68889	6.61413	2.49357	1.53141	3.32736	CRP1	pentatricopeptide repeat-containing protein At5g42310, chloroplastic-like
LOC103410432	89.7018207716777	176.22965087726	3.17399066609576	0.0180105371048279	-5.79501498427082	3.0405158972819e-39	8.23780895908431e-37	Down	2.08983	1.65542	1.94468	0.077364	0	0.033379	N	TMV resistance protein N-like	GO:0005524,GO:0005737,GO:0007165,GO:0009626,GO:0043531	ATP binding|cytoplasm|signal transduction|plant-type hypersensitive response|ADP binding
LOC103410480	64.9876614830953	95.1587678249476	34.816555141243	0.365878583099047	-1.45056312567414	3.14628635018142e-05	0.000342126186390696	Down	1.00174	0.444919	0.583822	0.24932	0.112914	0.209729		putative disease resistance protein At3g14460
LOC103410493	47.4681934865388	0.645965225875163	94.2904217472024	145.968262640541	7.18951091293187	7.98323218597106e-08	1.50673112676628e-06	Up	0	0.0201567	0.0233019	1.60413	2.76113	0.839319	GT5	anthocyanidin 3-O-glucosyltransferase 5-like	GO:0009718,GO:0047213	anthocyanin-containing compound biosynthetic process|anthocyanidin 3-O-glucosyltransferase activity
LOC103410500	506.834889285015	234.527199255253	779.142579314776	3.32218430011088	1.73213210986883	1.06799567062665e-14	5.41279623976687e-13	Up	6.56116	3.58401	6.12038	15.558	12.7589	17.7761	DTX33	protein DETOXIFICATION 33	GO:0005774,GO:0006855,GO:0015238,GO:0015297,GO:0016021	vacuolar membrane|drug transmembrane transport|drug transmembrane transporter activity|antiporter activity|integral component of membrane
LOC103410555	277.114617483237	553.177729094093	1.05150587238153	0.00190084635927682	-9.03914235744529	2.24739338218108e-97	4.6537095821021e-94	Down	39.6295	39.6155	43.4384	0	0.065437	0.146147	COPT5.1	copper transporter 5.1-like	GO:0005375,GO:0016021	copper ion transmembrane transporter activity|integral component of membrane
LOC103410572	34.9102858494163	49.3615766034856	20.458995095347	0.414472075308517	-1.2706531902014	0.0104864187808133	0.0472932919190692	Down	0.875377	0.692145	0.910645	0.630849	0.234225	0.0654485	WAV3	E3 ubiquitin-protein ligase WAV3-like	GO:0005886,GO:0009630,GO:0016567,GO:0046872,GO:0048364,GO:0061630	plasma membrane|gravitropism|protein ubiquitination|metal ion binding|root development|ubiquitin protein ligase activity
LOC103410574	266.520733328121	28.4793158845138	504.562150771727	17.7167932269782	4.14704559188392	1.55640956672238e-13	6.8054771250802e-12	Up	0.267084	0.91287	0.755652	9.46448	13.9076	8.38135	GATA8	GATA transcription factor 8-like	GO:0003700,GO:0005634,GO:0007623,GO:0008270,GO:0009845,GO:0043565,GO:0045893	DNA-binding transcription factor activity|nucleus|circadian rhythm|zinc ion binding|seed germination|sequence-specific DNA binding|positive regulation of transcription, DNA-templated
LOC103410576	23.9831939520465	9.20176597789177	38.7646219262012	4.21273720928541	2.074757923333	0.000519813112827253	0.0038718864699029	Up	0.954402	0.357413	0.178763	1.43582	1.6354	2.77829	IAA17	auxin-responsive protein IAA1-like	GO:0003700,GO:0005634,GO:0009733,GO:0009734,GO:0042802,GO:1900057	DNA-binding transcription factor activity|nucleus|response to auxin|auxin-activated signaling pathway|identical protein binding|positive regulation of leaf senescence	path:mdm04075	Plant hormone signal transduction
LOC103410605	37.3834961255265	50.2865127951241	24.4804794559288	0.486819986020238	-1.03853969688419	0.015040940760268	0.0629827144203016	Down	1.50029	1.56607	1.49833	0.451117	0.897301	0.580077	BRG3	probable BOI-related E3 ubiquitin-protein ligase 2	GO:0004842,GO:0005634,GO:0006952,GO:0043067,GO:0043161,GO:0046872	ubiquitin-protein transferase activity|nucleus|defense response|regulation of programmed cell death|proteasome-mediated ubiquitin-dependent protein catabolic process|metal ion binding
LOC103410611	10.0195101249342	16.976231462065	3.0627887878035	0.180416295256553	-2.47059844573912	0.01475864598575	0.0620526681837407	Down	0.0550693	0.265714	0.278777	0.028325	0.0774635	0.014415	At1g07650	probable leucine-rich repeat receptor-like serine/threonine-protein kinase At3g14840
LOC103410642	993.467459120442	1839.62693686787	147.307981373011	0.0800749208553207	-3.64250572270911	0.049764151968124	0.159304634005733	Down	116.919	12.8354	36.0775	3.83545	2.68063	5.0209	HSP17.9-D	17.9 kDa class II heat shock protein-like	GO:0000302,GO:0005737,GO:0006457,GO:0009408,GO:0009651,GO:0042542,GO:0043621,GO:0051082,GO:0051259	response to reactive oxygen species|cytoplasm|protein folding|response to heat|response to salt stress|response to hydrogen peroxide|protein self-association|unfolded protein binding|protein complex oligomerization	path:mdm04141	Protein processing in endoplasmic reticulum
LOC103410658	278.600870462234	501.161281725348	56.0404591991209	0.111821206550894	-3.1607342780431	5.46001347832944e-36	1.31904825613975e-33	Down	5.38938	4.87779	5.08709	0.503319	0.367736	0.317744	CPK13	TMV resistance protein N-like	GO:0004683,GO:0005509,GO:0005524,GO:0005634,GO:0005737,GO:0009409,GO:0009414,GO:0009738,GO:0009931,GO:0016020,GO:0018105,GO:0035556,GO:1901002	calmodulin-dependent protein kinase activity|calcium ion binding|ATP binding|nucleus|cytoplasm|response to cold|response to water deprivation|abscisic acid-activated signaling pathway|calcium-dependent protein serine/threonine kinase activity|membrane|peptidyl-serine phosphorylation|intracellular signal transduction|positive regulation of response to salt stress	path:mdm04626	Plant-pathogen interaction
LOC103410663	5.69613704692307	0	11.3922740938461	Inf	Inf	7.47539897135325e-05	0.000733621584900239	Up	0	0	0	0.138282	0.168358	0.188783		uncharacterized LOC103410663
LOC103410677	10.274821227213	0	20.549642454426	Inf	Inf	3.921723929382e-08	7.83533953913054e-07	Up	0	0	0	0.406693	0.620259	0.896538		uncharacterized LOC103410677
LOC103410698	85.1855790401285	114.725058401469	55.6460996787882	0.485038756607648	-1.04382806566653	0.00087737133273461	0.00605595117523246	Down	0.88047	0.966895	0.863913	0.579956	0.445164	0.589854		uncharacterized LOC103410698
LOC103410709	3.93341127763815	0.946614341593566	6.92020821368273	7.31048317103773	2.86996676122886	0.0460247455290806	0.150365039950459	Up	0	0.0703264	0.0408752	0.146397	0.278492	0.19611	ZAT10	zinc finger protein ZAT10-like	GO:0003700,GO:0005634,GO:0006979,GO:0009409,GO:0009414,GO:0009611,GO:0009644,GO:0009651,GO:0009737,GO:0010117,GO:0010200,GO:0015979,GO:0035264,GO:0043565,GO:0045892,GO:0046872	DNA-binding transcription factor activity|nucleus|response to oxidative stress|response to cold|response to water deprivation|response to wounding|response to high light intensity|response to salt stress|response to abscisic acid|photoprotection|response to chitin|photosynthesis|multicellular organism growth|sequence-specific DNA binding|negative regulation of transcription, DNA-templated|metal i…
LOC103410726	63.108152930352	125.882619900856	0.333685959848413	0.00265077069504291	-8.55937240941456	2.11739980606775e-17	1.4341920649043e-15	Down	3.75027	1.95263	4.04994	0	0.0223622	0	LRK10	rust resistance kinase Lr10-like	GO:0004674,GO:0005524,GO:0005886,GO:0016021	protein serine/threonine kinase activity|ATP binding|plasma membrane|integral component of membrane
LOC103410737	36.7323371200194	19.4974247851645	53.9672494548743	2.76791679155176	1.46880057367551	0.0297840248858736	0.107239717501138	Up	0.590678	0.570064	0.30448	1.86241	1.2778	0.623315	APS1	ATP sulfurylase 1, chloroplastic	GO:0000103,GO:0001887,GO:0004020,GO:0004781,GO:0005524,GO:0005886,GO:0009507,GO:0009570,GO:0009735,GO:0046686,GO:0070814	sulfate assimilation|selenium compound metabolic process|adenylylsulfate kinase activity|sulfate adenylyltransferase (ATP) activity|ATP binding|plasma membrane|chloroplast|chloroplast stroma|response to cytokinin|response to cadmium ion|hydrogen sulfide biosynthetic process	path:mdm00230,path:mdm00261,path:mdm00450,path:mdm00920	Purine metabolism|Monobactam biosynthesis|Selenocompound metabolism|Sulfur metabolism
LOC103410761	57.5913680745472	15.6589506250861	99.5237855240084	6.35571232752776	2.6680538268511	6.52046782099944e-06	8.33729887346913e-05	Up	0.351901	0.367735	0.573321	2.53086	3.26951	1.50313	AFR	F-box protein AFR-like	GO:0009585,GO:0010017,GO:0016567	red, far-red light phototransduction|red or far-red light signaling pathway|protein ubiquitination
LOC103410762	68.4892425559318	103.55395422058	33.424530891284	0.322774066358554	-1.63140342655331	2.07667183941424e-06	2.97591283364404e-05	Down	2.05856	2.46005	2.92901	0.736591	0.532283	0.749639	CBSPPR1	pentatricopeptide repeat-containing protein At5g10690
LOC103410780	22.3453711519367	36.7694762106454	7.92126609322797	0.215430484999256	-2.21470567859245	8.58609780163014e-05	0.000826123382904937	Down	0.365604	0.561594	0.471373	0.0990689	0.0379592	0.0705393	At4g27190	disease resistance protein At4g27190-like			path:mdm04626	Plant-pathogen interaction
LOC103410792	6.52245509202724	13.0449101840545	0	0	-Inf	3.18224123144588e-05	0.000345646958784624	Down	1.25025	0.362437	1.05122	0	0	0	CBP	citrate-binding protein-like	GO:0005773	vacuole
LOC103410842	54.2531439523393	85.6747882579862	22.8314996466924	0.266490295580791	-1.90784509763418	0.0384405706539571	0.130920129612102	Down	1.90523	0.626937	1.09617	0.247325	0.164565	0.391244	UGT71A16	UDP-glycosyltransferase 71A16-like	GO:0035251	UDP-glucosyltransferase activity
LOC103410847	44.4304867045265	72.5150769715767	16.3458964374762	0.225413763869867	-2.14935248505359	2.08864741947071e-07	3.68084429729215e-06	Down	0.726053	0.838918	0.786378	0.205815	0.133403	0.149265		myosin-11-like
LOC103410867	53.1356084656396	14.8017763431814	91.4694405880979	6.17962590890211	2.62751950549096	5.15888912821873e-11	1.64167064574161e-09	Up	0.731702	0.517799	0.264263	2.24941	2.44206	2.85273		uncharacterized LOC103410867
LOC103410911	390.777996964734	649.122612836966	132.433381092501	0.204019053524736	-2.29322420179832	4.40991743067542e-22	4.31903737551623e-20	Down	19.7376	20.5074	13.3608	3.02681	3.36553	3.76174	BCA5	beta carbonic anhydrase 5, chloroplastic-like	GO:0004089,GO:0005737,GO:0008270,GO:0009507,GO:0010037,GO:0010119,GO:0015976	carbonate dehydratase activity|cytoplasm|zinc ion binding|chloroplast|response to carbon dioxide|regulation of stomatal movement|carbon utilization	path:mdm00910	Nitrogen metabolism
LOC103410973	1044.54951370512	645.595937756584	1443.50308965365	2.23592343946549	1.16087078952526	5.27878007163279e-05	0.000541322370982082	Up	5.84141	9.39974	8.07753	17.8062	11.2783	17.2246		systemin receptor SR160	GO:0004674,GO:0005496,GO:0005524,GO:0005886,GO:0006952,GO:0016021	protein serine/threonine kinase activity|steroid binding|ATP binding|plasma membrane|defense response|integral component of membrane	path:mdm04075	Plant hormone signal transduction
LOC103410975	32.442187047115	58.5971466474946	6.28722744673555	0.107295795212656	-3.22033455509033	4.18414917703136e-06	5.57437888980419e-05	Down	1.30989	0.655282	0.786808	0.117433	0.0851543	0.0951031	XK2	xylulose kinase 2-like	GO:0004856,GO:0005524,GO:0005737,GO:0005829,GO:0005997,GO:0016117,GO:0016310	xylulokinase activity|ATP binding|cytoplasm|cytosol|xylulose metabolic process|carotenoid biosynthetic process|phosphorylation	path:mdm00040	Pentose and glucuronate interconversions
LOC103410994	20.8429393458184	31.0837033496593	10.6021753419776	0.341084690672605	-1.55179809275451	0.00519601376891193	0.0268554892424241	Down	1.44989	0.700928	0.950599	0.207306	0.0379108	0.633557	At1g31020	thioredoxin O2, mitochondrial-like	GO:0005739,GO:0006662,GO:0015035,GO:0016671,GO:0045454	mitochondrion|glycerol ether metabolic process|protein disulfide oxidoreductase activity|oxidoreductase activity, acting on a sulfur group of donors, disulfide as acceptor|cell redox homeostasis
LOC103410998	120.055365657511	70.2039941516026	169.906737163419	2.42018619049668	1.27511804162108	5.28455201323464e-06	6.87608450914148e-05	Up	1.59587	1.8472	1.81731	3.88097	2.96767	4.62065		transcription termination factor MTERF15, mitochondrial-like
LOC103411017	413.974602621816	269.921545543383	558.02765970025	2.06736982991438	1.04779649425794	0.00157578815438606	0.0099201082726714	Up	10.9479	9.60205	11.087	24.3534	20.6825	12.8551	mrt4	mRNA turnover protein 4 homolog	GO:0000027,GO:0000956,GO:0005730,GO:0005737,GO:0006364	ribosomal large subunit assembly|nuclear-transcribed mRNA catabolic process|nucleolus|cytoplasm|rRNA processing
LOC103411018	358.467108891563	201.450536966425	515.483680816701	2.55885980042145	1.35550110447871	1.12526376409072e-09	2.94127422978989e-08	Up	4.34497	3.85612	3.02294	7.65609	8.05044	10.4616	GMGT1	galactomannan galactosyltransferase 1-like	GO:0000139,GO:0016021,GO:0016757,GO:0071555	Golgi membrane|integral component of membrane|transferase activity, transferring glycosyl groups|cell wall organization
LOC103411021	488.367070171528	943.478149006655	33.2559913364003	0.0352482899274499	-4.82630292298763	6.73059949954448e-72	6.50400264972649e-69	Down	20.9864	17.7114	22.7476	0.635802	0.573142	0.595968	SEOA	protein SIEVE ELEMENT OCCLUSION B-like	GO:0010088,GO:0042803,GO:0043621	phloem development|protein homodimerization activity|protein self-association
LOC103411043	60.6815563728542	33.8474898900357	87.5156228556727	2.58558679358484	1.37049173436018	9.21972564980821e-05	0.000877478156887525	Up	0.72521	0.933633	0.968287	2.50749	1.81358	1.73767	NPF5.9	protein NRT1/ PTR FAMILY 5.8-like	GO:0015333,GO:0016021,GO:0035673,GO:1904680	peptide:proton symporter activity|integral component of membrane|oligopeptide transmembrane transporter activity|peptide transmembrane transporter activity
LOC103411059	63.9106391553233	87.1187679857015	40.7025103249451	0.467207138783522	-1.09786577655791	0.00133986411955168	0.0086567106810348	Down	3.29912	2.656	3.01178	1.00545	0.980874	1.32866	At5g43822	uncharacterized protein At5g43822-like
LOC103411103	27.7950926106167	44.1601037657731	11.4300814554603	0.258832758095088	-1.94990787728424	9.56690083119196e-05	0.000906650719503939	Down	1.37291	1.53587	1.31161	0.618042	0.166643	0.112574	CCB1	protein COFACTOR ASSEMBLY OF COMPLEX C SUBUNIT B CCB1, chloroplastic-like	GO:0009507,GO:0009535,GO:0010190,GO:0016021	chloroplast|chloroplast thylakoid membrane|cytochrome b6f complex assembly|integral component of membrane
LOC103411114	38.229433707262	53.5321424046544	22.9267250098696	0.428279608848164	-1.22337510529312	0.0330933389947524	0.116528106092296	Down	1.74405	0.959777	0.860029	0.232228	0.493461	0.762768	GDPD1	glycerophosphodiester phosphodiesterase GDPD1, chloroplastic-like	GO:0000287,GO:0006071,GO:0008889,GO:0009507,GO:0009536,GO:0030643,GO:0046475	magnesium ion binding|glycerol metabolic process|glycerophosphodiester phosphodiesterase activity|chloroplast|plastid|cellular phosphate ion homeostasis|glycerophospholipid catabolic process	path:mdm00564	Glycerophospholipid metabolism
LOC103411133	1244.60188676438	2234.55679098977	254.64698253899	0.113958608510548	-3.13341818400615	3.04331024784625e-06	4.19123819881534e-05	Down	91.3724	52.2903	41.5965	2.66185	9.09732	6.5913	LHT1	lysine histidine transporter 1-like	GO:0003333,GO:0005886,GO:0015171,GO:0015293,GO:0016021,GO:0043090,GO:0080167	amino acid transmembrane transport|plasma membrane|amino acid transmembrane transporter activity|symporter activity|integral component of membrane|amino acid import|response to karrikin
LOC103411141	9.95286471747012	19.2039663624938	0.701763072446469	0.0365426110002486	-4.7742764703541	6.9193412049995e-06	8.78951488029193e-05	Down	0.722757	0.376985	0.608105	0	0	0		uncharacterized LOC103411141
LOC103411143	240.016345735503	150.090392726535	329.942298744471	2.19829059509243	1.13638211075829	0.00650609899943563	0.0322248094983152	Up	5.33183	2.80632	3.767	4.98094	9.53626	9.13417	bem46	alpha/beta hydrolase domain-containing protein 17C-like	GO:0005783,GO:0016021,GO:0016788	endoplasmic reticulum|integral component of membrane|hydrolase activity, acting on ester bonds
LOC103411161	17.2895262121953	29.0600928830245	5.51895954136614	0.189915412988581	-2.39657109966929	0.000204422135993923	0.0017494758336472	Down	0.409903	0.508064	0.553769	0.153763	0.0927635	0.0173141	AO	L-aspartate oxidase, chloroplastic-like	GO:0008734,GO:0009435,GO:0009507,GO:0044318	L-aspartate oxidase activity|NAD biosynthetic process|chloroplast|L-aspartate:fumarate oxidoreductase activity	path:mdm00250,path:mdm00760	Alanine, aspartate and glutamate metabolism|Nicotinate and nicotinamide metabolism
LOC103411175	176.827984982685	236.649011017464	117.006958947906	0.494432486511727	-1.01615455676319	4.1883779653869e-05	0.000442335436125925	Down	4.25447	3.10658	3.2238	1.96768	1.11329	1.67768		uncharacterized LOC103411175
LOC103411182	4.42531282570164	8.14886257895682	0.701763072446469	0.0861179171506296	-3.53754276289377	0.0144049306499437	0.0608581140065597	Down	0.159976	0.312845	0.0723086	0	0	0.0340967	SH3P2	SH3 domain-containing protein 2-like	GO:0000421,GO:0005634,GO:0005768,GO:0005770,GO:0005829,GO:0005886,GO:0009504,GO:0009920,GO:0030136,GO:0043130,GO:0072583	autophagosome membrane|nucleus|endosome|late endosome|cytosol|plasma membrane|cell plate|cell plate formation involved in plant-type cell wall biogenesis|clathrin-coated vesicle|ubiquitin binding|clathrin-dependent endocytosis
LOC103411183	7.16480467612008	0.993695912183154	13.335913440057	13.420517561311	3.74636840493058	0.00615380895400861	0.0308563805904407	Up	0.0168795	0	0	0.122976	0.388049	0.145655	AATP1	AAA-ATPase At3g28580-like	GO:0005524,GO:0005739,GO:0005783,GO:0009409,GO:0009414,GO:0009651,GO:0009737,GO:0010154,GO:0010431,GO:0016021,GO:0016887,GO:0031966	ATP binding|mitochondrion|endoplasmic reticulum|response to cold|response to water deprivation|response to salt stress|response to abscisic acid|fruit development|seed maturation|integral component of membrane|ATPase activity|mitochondrial membrane
LOC103411187	2.90454359606671	0	5.80908719213341	Inf	Inf	0.00878568734505995	0.0410669261743451	Up	0	0	0	0.346756	0.439714	0.140428		uncharacterized LOC103411187
LOC103411195	22.6402378510088	41.1054271563766	4.17504854564099	0.101569277695569	-3.29946400792382	0.000338544002870494	0.00269079853244058	Down	1.01827	1.35718	0.808139	0.197249	0.0711503	0.079976	NRP2	NAP1-related protein 2-like	GO:0000724,GO:0005634,GO:0005737,GO:0006334,GO:0016444	double-strand break repair via homologous recombination|nucleus|cytoplasm|nucleosome assembly|somatic cell DNA recombination
LOC103411200	29.9972584958686	1.55515630148406	58.4393606902532	37.5778052884365	5.23180890427572	0.0150410239643296	0.0629827144203016	Up	0.0833415	0.0267884	0	0.251612	1.09592	3.2491	AED3	aspartyl protease AED3-like	GO:0000166,GO:0004190,GO:0005618,GO:0006508,GO:0009505,GO:0009627,GO:0030163,GO:0043067,GO:0048046	nucleotide binding|aspartic-type endopeptidase activity|cell wall|proteolysis|plant-type cell wall|systemic acquired resistance|protein catabolic process|regulation of programmed cell death|apoplast
LOC103411216	4916.60970824795	3213.6211134357	6619.5983030602	2.05985648880156	1.04254382764804	0.000125253745768607	0.00114509810464582	Up	196.173	134.512	180.11	320.099	423	290.767		uncharacterized LOC103411216
LOC103411220	54.9891152720445	19.0180546562866	90.9601758878023	4.78283281501319	2.25786536247896	0.0227325362539694	0.0871344544649942	Up	0.587104	0.617998	0.41875	1.89635	1.0754	4.09182	PMAT1	phenolic glucoside malonyltransferase 1-like	GO:0005829,GO:0009636,GO:0050736	cytosol|response to toxic substance|O-malonyltransferase activity
LOC103411249	643.233667148808	408.968105711794	877.499228585821	2.14564220615338	1.10140952136756	7.22499649663277e-08	1.37345998975334e-06	Up	9.69011	13.4778	9.35454	20.9054	19.5451	21.7568	At4g03415	probable protein phosphatase 2C 52	GO:0004721,GO:0004722,GO:0005886,GO:0006470,GO:0046872	phosphoprotein phosphatase activity|protein serine/threonine phosphatase activity|plasma membrane|protein dephosphorylation|metal ion binding
LOC103411255	196.150946077488	327.065038172401	65.2368539825748	0.199461410938663	-2.32581843431657	2.76778586153456e-19	2.13399234377359e-17	Down	11.0223	13.1563	12.0135	2.18132	2.08534	2.07433	THF1	protein THYLAKOID FORMATION1, chloroplastic-like	GO:0009570,GO:0009707,GO:0010207,GO:0016021	chloroplast stroma|chloroplast outer membrane|photosystem II assembly|integral component of membrane
LOC103411258	288.434984813626	452.44839860314	124.421571024112	0.274996157370084	-1.86251663545681	7.13164729748876e-08	1.35867028161183e-06	Down	16.2857	12.5944	20.6582	4.43984	4.74895	2.94369	PHOS32	universal stress protein PHOS32-like	GO:0002238,GO:0005524,GO:0005634,GO:0005829,GO:0005886,GO:0009507	response to molecule of fungal origin|ATP binding|nucleus|cytosol|plasma membrane|chloroplast
LOC103411276	1599.50648149608	1001.32283376249	2197.69012922967	2.19478679116084	1.13408079840535	2.51539512801594e-09	6.17453892982067e-08	Up	28.1848	25.2322	26.5682	55.3326	53.7532	50.0037	NTR2	thioredoxin reductase NTRB-like	GO:0004791,GO:0005759,GO:0019430	thioredoxin-disulfide reductase activity|mitochondrial matrix|removal of superoxide radicals	path:mdm00450	Selenocompound metabolism
LOC103411332	1216.98012100697	1910.01506889599	523.945173117948	0.274314680365738	-1.86609626262419	0.0022140681068361	0.0131961008259002	Down	25.3075	15.8154	11.3919	2.08607	3.23211	7.29506	MER3	DExH-box ATP-dependent RNA helicase DExH17	GO:0003677,GO:0003678,GO:0005524,GO:0005634,GO:0007131,GO:0019843,GO:0051026	DNA binding|DNA helicase activity|ATP binding|nucleus|reciprocal meiotic recombination|rRNA binding|chiasma assembly
LOC103411333	76.9941975616403	12.9012508961345	141.087144227146	10.9359274819947	3.45100367621816	9.03964938391486e-10	2.39981168168216e-08	Up	0.253365	0.212651	0.228225	2.37501	1.33038	2.05773	N	TMV resistance protein N-like	GO:0005524,GO:0005737,GO:0007165,GO:0009626,GO:0043531	ATP binding|cytoplasm|signal transduction|plant-type hypersensitive response|ADP binding
LOC103411388	6.32943131048212	12.2999526646977	0.358909956266557	0.0291797835366205	-5.09888700877397	0.000287694713355876	0.00234474831042644	Down	0.267162	0.256654	0.17996	0	0	0.0279362		uncharacterized protein Mb2734-like
LOC103411419	66.5638635022456	117.129295894374	15.9984311101175	0.136587785215961	-2.87209962294526	0.00651146210022193	0.0322371692360894	Down	0.830989	2.87177	1.45744	0.429556	0.177805	0.126151	SD18	receptor-like serine/threonine-protein kinase SD1-8
LOC103411421	16.9485770874635	31.0740450450544	2.82310912987252	0.0908510342241985	-3.46035325196223	1.01069849429146e-06	1.55356041089658e-05	Down	0.613299	0.406087	0.617355	0.101025	0	0.0341235	At2g19130	G-type lectin S-receptor-like serine/threonine-protein kinase At2g19130
LOC103411452	3.49327334433345	6.6528607288185	0.333685959848413	0.05015676315047	-4.317411942461	0.018836661839847	0.0751444649425022	Down	0.162093	0.0428967	0.116337	0	0.0138491	0	ICR3	interactor of constitutive active ROPs 2, chloroplastic-like	GO:0005886	plasma membrane
LOC103411496	87.9967691309081	146.027432005954	29.9661062558619	0.205208746358287	-2.2848358724277	5.65637431437424e-05	0.000575160615130513	Down	4.9189	2.16697	3.57508	1.04166	0.499744	0.469928	At1g06690	uncharacterized oxidoreductase At1g06690, chloroplastic	GO:0009507,GO:0009535,GO:0009941,GO:0010287,GO:0016491	chloroplast|chloroplast thylakoid membrane|chloroplast envelope|plastoglobule|oxidoreductase activity
LOC103411531	2.23201873006004	0	4.46403746012009	Inf	Inf	0.0299216177186706	0.107621302439735	Up	0	0	0	0	0.226674	0.126861	ACT	vinorine synthase-like	GO:0009820,GO:0050636	alkaloid metabolic process|vinorine synthase activity	path:mdm00940,path:mdm00941,path:mdm00945	Phenylpropanoid biosynthesis|Flavonoid biosynthesis|Stilbenoid, diarylheptanoid and gingerol biosynthesis
LOC103411536	57.2503181594963	98.8003612796856	15.7002750393069	0.158909085310552	-2.65372648462649	9.86332208417308e-12	3.43262553685687e-10	Down	3.49189	3.09081	4.0901	1.08706	0.228891	0.220912		annexin-like protein RJ4	GO:0005509,GO:0005544	calcium ion binding|calcium-dependent phospholipid binding
LOC103411541	46.8256638240634	93.2924176918603	0.358909956266557	0.00384715033811233	-8.02199407659989	2.3455289626737e-23	2.55627385819212e-21	Down	5.47342	3.65691	2.71387	0	0	0		retinoblastoma-related protein-like
LOC103411554	439.902834114275	589.902543639019	289.90312458953	0.491442404708347	-1.02490574711199	1.20037252690626e-06	1.81055148569263e-05	Down	13.4522	12.0201	12.7053	5.77483	4.3333	6.70621	OCT7	organic cation/carnitine transporter 7-like	GO:0005524,GO:0005886,GO:0016021,GO:0090416,GO:0090417,GO:2001142,GO:2001143	ATP binding|plasma membrane|integral component of membrane|nicotinate transmembrane transporter activity|N-methylnicotinate transmembrane transporter activity|nicotinate transport|N-methylnicotinate transport
LOC103411565	71.7243526139088	142.746942155371	0.701763072446469	0.00491613383691711	-7.66826009246081	6.1508570017007e-36	1.47366400396118e-33	Down	1.9309	2.73881	1.96335	0.0308319	0	0		uncharacterized LOC103411565
LOC103411570	105.258576965544	202.894043908672	7.62311002241738	0.0375718768060474	-4.73420300589115	0.000160572927372281	0.00142224539093261	Down	6.06478	10.2558	2.32079	0.353006	0.20251	0.0974587	ANN3	annexin D3	GO:0005509,GO:0005544,GO:0005773,GO:0009408,GO:0009409,GO:0009414,GO:0009651	calcium ion binding|calcium-dependent phospholipid binding|vacuole|response to heat|response to cold|response to water deprivation|response to salt stress
LOC103411618	598.667841774214	396.132887076335	801.202796472093	2.02256066741992	1.0161829774504	6.69120741952607e-07	1.06757348977469e-05	Up	7.81831	8.71841	8.39687	13.6716	13.8325	16.8942	At1g63430	probable LRR receptor-like serine/threonine-protein kinase At1g63430	GO:0004674,GO:0005524,GO:0005886,GO:0016021	protein serine/threonine kinase activity|ATP binding|plasma membrane|integral component of membrane
LOC103411620	6310.00809509231	2710.87139137153	9909.1447988131	3.65533563501134	1.87000388134463	0.00037280194763712	0.00292174329872941	Up	29.6488	72.3379	66.9787	126.61	249.872	167.437	PMEU1	pectinesterase-like	GO:0005576,GO:0005618,GO:0030599,GO:0042545,GO:0045330,GO:0045490,GO:0046910	extracellular region|cell wall|pectinesterase activity|cell wall modification|aspartyl esterase activity|pectin catabolic process|pectinesterase inhibitor activity	path:mdm00040	Pentose and glucuronate interconversions
LOC103411622	8.91893488436811	17.1200498562031	0.717819912533114	0.0419286111058273	-4.57592114837941	0.000586442532280243	0.00428992405016509	Down	1.70778	1.63402	0.317636	0	0	0.148233	FLZ17	FCS-Like Zinc finger 17-like	GO:0005634,GO:0005737,GO:0005829,GO:0009737,GO:0009744,GO:0009749,GO:0034097,GO:0042594,GO:0046872,GO:1902074,GO:1905582	nucleus|cytoplasm|cytosol|response to abscisic acid|response to sucrose|response to glucose|response to cytokine|response to starvation|metal ion binding|response to salt|response to mannose
LOC103411632	38.7802084605181	58.1322586468052	19.4281582742309	0.33420614864237	-1.58118981889624	0.000215494754295693	0.00183064544204984	Down	1.22509	1.32127	1.30613	0.656403	0.383063	0.295117	JAL19	jacalin-related lectin 19-like	GO:0030246	carbohydrate binding
LOC103411668	11.0605087299945	22.121017459989	0	0	-Inf	2.63816624846287e-08	5.41262841775928e-07	Down	0.460678	0.852039	1.12104	0	0	0	LOG5	cytokinin riboside 5'-monophosphate phosphoribohydrolase LOG5-like	GO:0005634,GO:0005829,GO:0009691,GO:0016799	nucleus|cytosol|cytokinin biosynthetic process|hydrolase activity, hydrolyzing N-glycosyl compounds
LOC103411704	183.828506625731	267.539399826244	100.117613425219	0.37421633408104	-1.41805556307667	1.60995035685089e-08	3.41922790074045e-07	Down	8.67601	6.47132	7.52432	2.55981	2.04232	2.95047	At1g78140	uncharacterized methyltransferase At1g78140, chloroplastic-like	GO:0005739,GO:0008168,GO:0009507,GO:0010287	mitochondrion|methyltransferase activity|chloroplast|plastoglobule
LOC103411713	26.6491641808586	38.5588887767673	14.7394395849499	0.38225789312245	-1.38738180323968	0.019258727296335	0.0764876836025598	Down	1.44453	0.658618	0.847087	0.266315	0.53557	0.200488	At2g42690	phospholipase A1-IIdelta-like	GO:0005737,GO:0008970,GO:0009507,GO:0009650,GO:0016042,GO:0071493	cytoplasm|phospholipase A1 activity|chloroplast|UV protection|lipid catabolic process|cellular response to UV-B
LOC103411748	184.377337574247	269.320364040196	99.4343111082981	0.369204577094131	-1.43750765644844	0.000105159448999542	0.000983410460160235	Down	11.6545	6.56767	8.69421	3.07359	3.52114	2.10466	PUB45	U-box domain-containing protein 4-like	GO:0004842,GO:0005634,GO:0005737,GO:0016567,GO:0070696	ubiquitin-protein transferase activity|nucleus|cytoplasm|protein ubiquitination|transmembrane receptor protein serine/threonine kinase binding
LOC103411766	18.2980160732125	9.61468489156417	26.9813472548608	2.80626432994533	1.48865090686965	0.0124176554208021	0.0540055697572981	Up	0.213472	0.262681	0.130506	0.622659	0.530007	0.326328	RKL1	probable inactive receptor kinase At1g48480
LOC103411772	226.368752426308	342.355853606503	110.381651246112	0.322417887947034	-1.63299630717355	1.59920334170741e-11	5.44142076010536e-10	Down	6.35447	4.78933	5.12041	1.30019	1.63811	1.56411	HDG11	homeobox-leucine zipper protein HDG11-like	GO:0000976,GO:0003700,GO:0005634,GO:0008289,GO:0009828,GO:0010091	transcription regulatory region sequence-specific DNA binding|DNA-binding transcription factor activity|nucleus|lipid binding|plant-type cell wall loosening|trichome branching
LOC103411783	38.6750903836998	66.8305670984317	10.519613668968	0.157407218368716	-2.66742639352121	1.82556015522843e-06	2.65677655120845e-05	Down	2.51123	1.3403	1.73143	0.319517	0.145427	0.29361		asparagine synthetase [glutamine-hydrolyzing] 1-like	GO:0004066,GO:0005524,GO:0006541,GO:0070981	asparagine synthase (glutamine-hydrolyzing) activity|ATP binding|glutamine metabolic process|L-asparagine biosynthetic process
LOC103411791	18.1817086832532	6.0841566110639	30.2792607554426	4.97673920825451	2.31520078869954	0.00112938710189146	0.00752006180706096	Up	0.198573	0.128042	0.297676	0.575772	1.31109	0.803173	At1g04570	probable folate-biopterin transporter 8, chloroplastic	GO:0016021,GO:0031969	integral component of membrane|chloroplast membrane
LOC103411867	313.036678469122	195.002527976463	431.070828961781	2.21059097764011	1.14443211012971	2.85508005063154e-07	4.88023411956417e-06	Up	2.62602	3.43516	3.50537	6.54291	5.61374	5.75761	NEDD1	protein NEDD1-like	GO:0000777,GO:0000919,GO:0005635,GO:0005828,GO:0009524,GO:0009553,GO:0009555,GO:0032467,GO:0060236,GO:2000694	condensed chromosome kinetochore|cell plate assembly|nuclear envelope|kinetochore microtubule|phragmoplast|embryo sac development|pollen development|positive regulation of cytokinesis|regulation of mitotic spindle organization|regulation of phragmoplast microtubule organization
LOC103411899	64.9478821716359	0	129.895764343272	Inf	Inf	4.48824172769881e-40	1.28825868996028e-37	Up	0	0	0.0144878	1.44391	1.50872	1.91596	N	TMV resistance protein N-like	GO:0005524,GO:0005737,GO:0007165,GO:0009626,GO:0043531	ATP binding|cytoplasm|signal transduction|plant-type hypersensitive response|ADP binding
LOC103411913	45.3332111415123	75.0796265945864	15.5867956884383	0.207603532348444	-2.26809710370492	4.59834176558788e-08	9.1055961601361e-07	Down	2.00709	1.73478	1.61428	0.540591	0.391711	0.219169		uncharacterized LOC103411913
LOC103411952	9.12847840594612	0.949028917744796	17.3079278941474	18.2375137053534	4.18883715720533	0.00188803724922779	0.0115766074143641	Up	0	0.013231	0.0153913	0.300578	0.064231	0.38622	N	TMV resistance protein N	GO:0005524,GO:0005737,GO:0007165,GO:0009626,GO:0043531	ATP binding|cytoplasm|signal transduction|plant-type hypersensitive response|ADP binding
LOC103411956	62.0611491594913	97.4001037710039	26.7221945479786	0.274354887863414	-1.86588481602329	0.00290254312826017	0.0165508901039068	Down	1.97342	1.03924	0.84535	0.413131	0.319343	0.237591	PLDBETA1	phospholipase D beta 1-like	GO:0004630,GO:0005546,GO:0005737,GO:0009506,GO:0009816,GO:0016020,GO:0016042,GO:0046686,GO:0070290	phospholipase D activity|phosphatidylinositol-4,5-bisphosphate binding|cytoplasm|plasmodesma|defense response to bacterium, incompatible interaction|membrane|lipid catabolic process|response to cadmium ion|N-acylphosphatidylethanolamine-specific phospholipase D activity	path:mdm00564,path:mdm00565,path:mdm04144	Glycerophospholipid metabolism|Ether lipid metabolism|Endocytosis
LOC103411970	43.0526148110792	67.5875391344198	18.5176904877386	0.273980836185056	-1.86785310866388	6.0780530590662e-06	7.81733621039615e-05	Down	3.2907	3.45424	3.11652	0.665454	0.533062	0.818216	LRK10	rust resistance kinase Lr10-like	GO:0004674,GO:0005524,GO:0005886,GO:0016021	protein serine/threonine kinase activity|ATP binding|plasma membrane|integral component of membrane
LOC103411980	200.995237064391	280.224554149922	121.765919978861	0.434529801816422	-1.20247296857647	1.02701621944214e-06	1.57613553211369e-05	Down	9.03674	8.81467	8.76123	3.10865	4.14423	3.10522		uncharacterized LOC103411980
LOC103411985	347.308566646544	469.103299814809	225.513833478278	0.480733845972318	-1.05668971517385	1.34183963117691e-06	1.99999644770276e-05	Down	15.3673	15.5517	14.9943	6.80638	6.66207	7.60722	PAA1	copper-transporting ATPase PAA1, chloroplastic-like	GO:0005375,GO:0005524,GO:0009507,GO:0009536,GO:0009570,GO:0009767,GO:0009941,GO:0016021,GO:0016531,GO:0031969,GO:0035434,GO:0043682,GO:0055070	copper ion transmembrane transporter activity|ATP binding|chloroplast|plastid|chloroplast stroma|photosynthetic electron transport chain|chloroplast envelope|integral component of membrane|copper chaperone activity|chloroplast membrane|copper ion transmembrane transport|copper-transporting ATPase activity|copper ion homeostasis
LOC103411989	261.350659305912	96.1091127659395	426.592205845884	4.4386239095224	2.15011247238158	2.76314698957906e-19	2.13399234377359e-17	Up	1.89922	1.4433	1.75103	5.61334	6.37102	6.59027	PYD1	uncharacterized LOC103411989	GO:0002058,GO:0003954,GO:0004159,GO:0006210,GO:0006212,GO:0009507,GO:0009536,GO:0009570,GO:0017113,GO:0019483,GO:0042803,GO:0043562,GO:0050661,GO:0051536	uracil binding|NADH dehydrogenase activity|dihydrouracil dehydrogenase (NAD+) activity|thymine catabolic process|uracil catabolic process|chloroplast|plastid|chloroplast stroma|dihydropyrimidine dehydrogenase (NADP+) activity|beta-alanine biosynthetic process|protein homodimerization activity|cellular response to nitrogen levels|NADP binding|iron-sulfur cluster binding
LOC103411999	126.580154270668	252.450517048847	0.709791492489792	0.0028116064121685	-8.47438963440348	4.30276481111235e-60	2.83493526986698e-57	Down	4.70906	3.66991	3.5113	0.0156705	0	0.0157392		uncharacterized LOC103411999
LOC103412000	18.0515187292657	36.1030374585315	0	0	-Inf	0.00141506134594503	0.0090677781651075	Down	0.188259	1.54248	0.631054	0	0	0	FRS6	uncharacterized LOC103412000	GO:0005634,GO:0006355,GO:0008270	nucleus|regulation of transcription, DNA-templated|zinc ion binding
LOC103412013	76.7724493707673	104.218243573573	49.3266551679622	0.473301539889608	-1.07916847898584	0.000672814164006542	0.00483272611857028	Down	1.96613	1.3943	1.51321	0.605622	0.472674	1.00634		uncharacterized LOC103412013
LOC103412036	29.5182249420954	40.4545320361056	18.5819178480851	0.459328458712631	-1.12240192319077	0.0230470041262637	0.0880396165002483	Down	1.57284	0.655222	0.854723	0.365215	0.230069	0.628662		hippocampus abundant transcript 1 protein-like
LOC103412048	33.5312876332755	14.3417228235133	52.7208524430377	3.67604736835393	1.87815535684703	0.000589285222322933	0.00430568986030571	Up	0.757363	0.185792	0.214153	0.88536	1.32678	2.13374	GGP5	gamma-glutamyl peptidase 5-like	GO:0005829,GO:0008233	cytosol|peptidase activity
LOC103412056	379.464805947967	515.266222308541	243.663389587393	0.472888342060751	-1.08042851887395	6.03581962068387e-07	9.71562525283872e-06	Down	9.17266	9.93414	9.75765	4.36537	3.473	4.03551	EX1	protein EXECUTER 1, chloroplastic-like	GO:0000304,GO:0009507,GO:0010343,GO:0042651	response to singlet oxygen|chloroplast|singlet oxygen-mediated programmed cell death|thylakoid membrane
LOC103412081	135.125791679369	68.5269097475597	201.724673611179	2.9437293226018	1.5576450209557	1.30241227945979e-08	2.81978580892751e-07	Up	1.84524	2.32252	2.06294	5.96467	3.65598	5.7497	HISN7	bifunctional phosphatase IMPL2, chloroplastic-like	GO:0000105,GO:0004401,GO:0006021,GO:0008934,GO:0009507,GO:0046854,GO:0046872,GO:0052832,GO:0052833,GO:0052834	histidine biosynthetic process|histidinol-phosphatase activity|inositol biosynthetic process|inositol monophosphate 1-phosphatase activity|chloroplast|phosphatidylinositol phosphorylation|metal ion binding|inositol monophosphate 3-phosphatase activity|inositol monophosphate 4-phosphatase activity|inositol monophosphate phosphatase activity	path:mdm00053,path:mdm00340,path:mdm00562,path:mdm04070	Ascorbate and aldarate metabolism|Histidine metabolism|Inositol phosphate metabolism|Phosphatidylinositol signaling system
LOC103412083	8.68494606532619	17.3698921306524	0	0	-Inf	0.000102916707749858	0.000966177253130952	Down	0.559579	0.139563	0.324747	0	0	0	STY13	serine/threonine-protein kinase STY13-like	GO:0004674,GO:0004712,GO:0004713,GO:0005524,GO:0005886,GO:0006468,GO:0010344	protein serine/threonine kinase activity|protein serine/threonine/tyrosine kinase activity|protein tyrosine kinase activity|ATP binding|plasma membrane|protein phosphorylation|seed oilbody biogenesis
LOC103412090	26.2434543884373	14.3597764448821	38.1271323319925	2.65513411565548	1.40878473602162	0.0186317194557167	0.0745489880854232	Up	0.254398	0.428975	0.500186	0.627441	1.36822	0.531222		uncharacterized LOC103412090
LOC103412093	57.3567890424767	92.1572649262842	22.5563131586691	0.244758925698498	-2.03056662289839	5.47665200879513e-08	1.06940545920956e-06	Down	2.68307	2.06987	2.6713	0.519694	0.533936	0.4923	GC1	epimerase family protein SDR39U1 homolog, chloroplastic-like	GO:0009507,GO:0009536,GO:0009706,GO:0009941,GO:0010020,GO:0016491,GO:0042803,GO:0050662	chloroplast|plastid|chloroplast inner membrane|chloroplast envelope|chloroplast fission|oxidoreductase activity|protein homodimerization activity|coenzyme binding
LOC103412108	922.237085332127	547.370828990358	1297.1033416739	2.36969760348107	1.24470296891554	3.81856509183031e-10	1.0644250193477e-08	Up	33.4661	26.5531	23.4686	55.9	52.8955	59.0596	ZIM17	uncharacterized LOC103412108	GO:0005743,GO:0008270,GO:0015031	mitochondrial inner membrane|zinc ion binding|protein transport
LOC103412119	49.0963931877539	85.3282038312695	12.8645825442384	0.150765889431789	-2.72961803706431	4.40038431087467e-11	1.41114094217098e-09	Down	4.53088	4.11114	3.70514	0.597112	0.507076	0.52527	GGR	heterodimeric geranylgeranyl pyrophosphate synthase small subunit, chloroplastic-like	GO:0009507,GO:0009535,GO:0042651,GO:0043693,GO:0046872	chloroplast|chloroplast thylakoid membrane|thylakoid membrane|monoterpene biosynthetic process|metal ion binding	path:mdm00900	Terpenoid backbone biosynthesis
LOC103412139	2.07071589056797	4.14143178113595	0	0	-Inf	0.0460111860906322	0.150365039950459	Down	0.183217	0.176953	0.257351	0	0	0	hrf1	protein YIF1B-like	GO:0005789,GO:0005793,GO:0006886,GO:0006888,GO:0030134,GO:0030173	endoplasmic reticulum membrane|endoplasmic reticulum-Golgi intermediate compartment|intracellular protein transport|ER to Golgi vesicle-mediated transport|COPII-coated ER to Golgi transport vesicle|integral component of Golgi membrane
LOC103412147	15.6386627595764	7.55480807597371	23.7225174431791	3.14005560493628	1.65079010696898	0.00927699096567086	0.0429685202260422	Up	0.512936	0.299796	0.405248	1.18528	1.56125	0.547498		dCTP pyrophosphatase 1-like			path:mdm00240	Pyrimidine metabolism
LOC103412168	400.938486434917	261.155480510742	540.721492359093	2.07049643875596	1.04997672128131	0.00182968342257332	0.0112760464329083	Up	8.21446	6.72321	9.38042	19.1816	11.1078	12.0397	AMI1	amidase 1-like	GO:0004040,GO:0005654,GO:0005737,GO:0005829,GO:0009684,GO:0009851,GO:0016810,GO:0043864	amidase activity|nucleoplasm|cytoplasm|cytosol|indoleacetic acid biosynthetic process|auxin biosynthetic process|hydrolase activity, acting on carbon-nitrogen (but not peptide) bonds|indoleacetamide hydrolase activity	path:mdm00330,path:mdm00360,path:mdm00380	Arginine and proline metabolism|Phenylalanine metabolism|Tryptophan metabolism
LOC103412182	31.4946807064439	44.518702709121	18.4706587037668	0.414896607038428	-1.26917623577095	0.0386985632072259	0.131597812009089	Down	3.05424	1.36212	1.63589	1.40077	0.471521	0.480064	LPA1	protein LOW PSII ACCUMULATION 1, chloroplastic-like	GO:0009507,GO:0009535,GO:0010270,GO:0016021	chloroplast|chloroplast thylakoid membrane|photosystem II oxygen evolving complex assembly|integral component of membrane
LOC103412188	43.1392442153978	68.2721906141207	18.006297816675	0.263742786846373	-1.92279645707993	3.62507295715104e-06	4.89705801620729e-05	Down	1.43541	1.07073	1.24649	0.236731	0.428661	0.238851	PTST	protein PTST, chloroplastic-like	GO:0009507,GO:0009569,GO:0009570,GO:0010581,GO:0019252,GO:0030247,GO:2001070	chloroplast|chloroplast starch grain|chloroplast stroma|regulation of starch biosynthetic process|starch biosynthetic process|polysaccharide binding|starch binding
LOC103412245	1423.41837064164	2329.27084345327	517.565897830011	0.222200822753052	-2.17006393621819	3.10658221621025e-09	7.49249737503619e-08	Down	83.673	53.4062	56.1056	13.6175	11.6503	12.9179	MRL7	thioredoxin-like fold domain-containing protein MRL7, chloroplastic	GO:0006355,GO:0009570,GO:0009658,GO:0042644	regulation of transcription, DNA-templated|chloroplast stroma|chloroplast organization|chloroplast nucleoid
LOC103412262	37.5923151948668	24.4441201253132	50.7405102644203	2.07577568774406	1.05365055175754	0.0116784620489095	0.0516252843546641	Up	0.139142	0.227883	0.274615	0.398811	0.26716	0.298907	N	TMV resistance protein N-like	GO:0005524,GO:0005737,GO:0007165,GO:0009626,GO:0043531	ATP binding|cytoplasm|signal transduction|plant-type hypersensitive response|ADP binding
LOC103412278	10.3837481224024	1.59499414361996	19.1725021011849	12.0204216284277	3.58741559580947	0.00189614957297986	0.0116214325836546	Up	0	0.0792022	0.185007	1.17455	1.38856	0.172787		uncharacterized LOC103412278
LOC103412279	2.15645453292087	4.31290906584174	0	0	-Inf	0.0375911924461421	0.12861662563598	Down	0.165839	0.322314	0.187946	0	0	0		60S acidic ribosomal protein P2-2-like	GO:0003735,GO:0005840,GO:0006414	structural constituent of ribosome|ribosome|translational elongation	path:mdm03010	Ribosome
LOC103412304	29.2936988398739	50.171934491831	8.41546318791674	0.16773248377112	-2.57576598059896	7.03585815630172e-06	8.92645636547864e-05	Down	2.57573	2.18918	1.22985	0.240278	0.183904	0.371397	mtq2	methyltransferase N6AMT1-like	GO:0002184,GO:0003676,GO:0005634,GO:0005829,GO:0008276,GO:0008757,GO:0035657,GO:0036009	cytoplasmic translational termination|nucleic acid binding|nucleus|cytosol|protein methyltransferase activity|S-adenosylmethionine-dependent methyltransferase activity|eRF1 methyltransferase complex|protein-glutamine N-methyltransferase activity
LOC103412309	885.365615929079	1608.38787503594	162.343356822221	0.100935451791188	-3.30849511033209	4.28301787890666e-53	2.38778246749046e-50	Down	19.2085	20.5826	17.2043	1.15428	1.56574	2.35708	RBOHA	respiratory burst oxidase homolog protein A-like	GO:0004601,GO:0005509,GO:0005886,GO:0016021,GO:0050664	peroxidase activity|calcium ion binding|plasma membrane|integral component of membrane|oxidoreductase activity, acting on NAD(P)H, oxygen as acceptor	path:mdm04016,path:mdm04626	MAPK signaling pathway - plant|Plant-pathogen interaction
LOC103412329	232.536309544726	322.329387453345	142.743231636107	0.442848952631625	-1.17511338809003	5.58602679897557e-06	7.23911117131435e-05	Down	3.8789	5.54385	5.40874	1.54507	2.0212	2.1741		alpha-glucosidase-like	GO:0004558,GO:0030246,GO:0032450	alpha-1,4-glucosidase activity|carbohydrate binding|maltose alpha-glucosidase activity	path:mdm00052,path:mdm00500	Galactose metabolism|Starch and sucrose metabolism
LOC103412348	158.253193340461	241.591604510372	74.9147821705497	0.310088516206421	-1.68924799660153	5.46851840298132e-10	1.48856665260496e-08	Down	13.0148	12.0848	16.914	4.27784	3.46137	4.42392		macrophage migration inhibitory factor homolog			path:mdm00350,path:mdm00360	Tyrosine metabolism|Phenylalanine metabolism
LOC103412385	267.52737542744	163.774072114698	371.280678740182	2.26702965827313	1.18080326516942	3.20060358078643e-07	5.43172474921364e-06	Up	5.14816	4.64324	4.19985	11.5763	9.45022	9.59071	HMGB14	high mobility group B protein 14-like	GO:0003677,GO:0003700,GO:0005634	DNA binding|DNA-binding transcription factor activity|nucleus
LOC103412403	12.5397290021491	5.09287527503197	19.9865827292662	3.92442022431833	1.97247953265813	0.00662141928554545	0.0326620631424132	Up	0.0841656	0.048843	0.0569612	0.280712	0.174542	0.231185	ROA3	DNA replication licensing factor MCM3-like	GO:0003677,GO:0004386,GO:0005524,GO:0005634,GO:0006270,GO:0007049,GO:0042555	DNA binding|helicase activity|ATP binding|nucleus|DNA replication initiation|cell cycle|MCM complex	path:mdm03030	DNA replication
LOC103412406	305.371455254814	468.75542067972	141.987489829908	0.302903142163174	-1.72307155089169	6.16579111130657e-14	2.82826399235408e-12	Down	19.9405	16.072	18.2803	4.29628	3.92446	3.7927	EIF4E1	eukaryotic translation initiation factor 4E-1-like	GO:0000932,GO:0003743,GO:0005634,GO:0005730,GO:0005737,GO:0005845,GO:0006417,GO:0009615,GO:0010494	P-body|translation initiation factor activity|nucleus|nucleolus|cytoplasm|mRNA cap binding complex|regulation of translation|response to virus|cytoplasmic stress granule	path:mdm03013	RNA transport
LOC103412412	213.239508053214	48.0926349962186	378.386381110208	7.86786544634038	2.97597228532903	9.07578837367558e-16	5.16909832913271e-14	Up	1.19504	1.42394	1.09282	11.5626	6.91539	9.46589	N	TMV resistance protein N-like	GO:0005524,GO:0005737,GO:0007165,GO:0009626,GO:0043531	ATP binding|cytoplasm|signal transduction|plant-type hypersensitive response|ADP binding
LOC103412440	362.906522584284	202.21942810567	523.593617062898	2.58923498087084	1.37252590009847	8.52888880185038e-07	1.33649992630077e-05	Up	3.50874	2.88714	2.8971	8.97143	5.47425	6.95054	PICBP	calmodulin binding protein PICBP	GO:0005516,GO:0005886,GO:0006952	calmodulin binding|plasma membrane|defense response
LOC103412444	19.4529892404581	0.303063691869633	38.6029147890466	127.375584158237	6.99294495253684	3.59882252780133e-13	1.49469720746362e-11	Up	0.0160304	0	0	0.633756	0.513708	0.510509	PICBP	calmodulin binding protein PICBP-like	GO:0005516,GO:0005886,GO:0006952	calmodulin binding|plasma membrane|defense response
LOC103412448	393.772224181626	190.269679067557	597.274769295696	3.13909589916126	1.65034910382637	6.58889281965652e-14	3.00806303687941e-12	Up	6.05555	3.28012	4.04472	13.947	10.943	13.0245	ENT3	equilibrative nucleotide transporter 3-like	GO:0005337,GO:0005886,GO:0015858,GO:0016021	nucleoside transmembrane transporter activity|plasma membrane|nucleoside transport|integral component of membrane
LOC103412455	5.63539859116566	10.5782012662163	0.69259591611497	0.0654738833838336	-3.93293663925143	0.00272081426968056	0.0156545256622413	Down	0.482793	0.233359	0.211153	0	0.025252	0.0281826	VAT1	acetolactate synthase small subunit 1, chloroplastic-like	GO:0003984,GO:0005777,GO:0005829,GO:0005948,GO:0006551,GO:0006573,GO:0009097,GO:0009099,GO:0009507,GO:0043621,GO:0050790	acetolactate synthase activity|peroxisome|cytosol|acetolactate synthase complex|leucine metabolic process|valine metabolic process|isoleucine biosynthetic process|valine biosynthetic process|chloroplast|protein self-association|regulation of catalytic activity	path:mdm00290,path:mdm00650,path:mdm00660,path:mdm00770	Valine, leucine and isoleucine biosynthesis|Butanoate metabolism|C5-Branched dibasic acid metabolism|Pantothenate and CoA biosynthesis
LOC103412482	30.6063496336206	61.2126992672411	0	0	-Inf	0.00429058453150089	0.0229830091589451	Down	0.425881	2.70316	0.529093	0	0	0	PAP27	probable inactive purple acid phosphatase 27	GO:0003993,GO:0005576,GO:0046872	acid phosphatase activity|extracellular region|metal ion binding
LOC103412500	17.2803410254357	8.01969074794421	26.5409913029273	3.30947815035522	1.72660374596028	0.00574495565904129	0.029152155532226	Up	0.12288	0.117991	0.0589573	0.455988	0.278281	0.403226	PHO1	phosphate transporter PHO1	GO:0000139,GO:0000822,GO:0005789,GO:0005794,GO:0005802,GO:0005886,GO:0006799,GO:0006817,GO:0015114,GO:0016021,GO:0016036,GO:0048016	Golgi membrane|inositol hexakisphosphate binding|endoplasmic reticulum membrane|Golgi apparatus|trans-Golgi network|plasma membrane|polyphosphate biosynthetic process|phosphate ion transport|phosphate ion transmembrane transporter activity|integral component of membrane|cellular response to phosphate starvation|inositol phosphate-mediated signaling
LOC103412507	169.221913821279	6.26282458881732	332.18100305374	53.0401256402535	5.72901228776539	2.46215316094154e-13	1.04967382552493e-11	Up	0.0955102	0.0185353	0.215577	7.00314	4.33423	3.45976	IQD14	protein IQ-DOMAIN 14
LOC103412517	120.026923345987	221.882402470334	18.1714442216397	0.081896734573483	-3.61005026060149	6.48388192767688e-21	5.78362267948777e-19	Down	6.41331	4.84108	4.9258	0.352832	0.670964	0.143425		uncharacterized LOC103412517
LOC103412524	150.533911861863	95.1118453605762	205.955978363149	2.16540828939187	1.11463907185533	2.31572163356201e-05	0.000259500464464487	Up	3.9757	3.30551	3.71671	7.09917	4.3184	8.22515		MYB-like transcription factor ETC1
LOC103412525	59.5638140827512	85.3029064814471	33.8247216840553	0.396524843985381	-1.33451683508259	0.000144399074232016	0.00129481260809964	Down	2.57259	1.67061	1.32133	0.79713	0.89633	1.00755		cysteine-rich PDZ-binding protein-like
LOC103412527	26.8355040456823	9.26695420525618	44.4040538861083	4.79165569426495	2.26052424660284	0.000176025429784908	0.00154168495754214	Up	0.204218	0.257005	0.0919436	0.71939	1.21214	0.645389	CKX6	cytokinin dehydrogenase 6-like	GO:0005615,GO:0009690,GO:0010103,GO:0019139,GO:0071949	extracellular space|cytokinin metabolic process|stomatal complex morphogenesis|cytokinin dehydrogenase activity|FAD binding	path:mdm00908	Zeatin biosynthesis
LOC103412553	380.445687887117	232.074967136884	528.816408637349	2.27864476363553	1.18817602873309	2.74356874437854e-07	4.69793608384725e-06	Up	18.8756	17.3753	20.6734	38.7839	42.5228	30.5824	VHA-e1	V-type proton ATPase subunit e1-like	GO:0005773,GO:0005794,GO:0015078,GO:0015991,GO:0016021,GO:0033179,GO:0055085	vacuole|Golgi apparatus|proton transmembrane transporter activity|ATP hydrolysis coupled proton transport|integral component of membrane|proton-transporting V-type ATPase, V0 domain|transmembrane transport	path:mdm00190,path:mdm04145	Oxidative phosphorylation|Phagosome
LOC103412566	2.78126703194944	5.56253406389888	0	0	-Inf	0.0150856763091063	0.0631255421768173	Down	0.0294091	0.0284726	0.299219	0	0	0		uncharacterized LOC103412566
LOC103412575	20.5810931774747	30.1781314739179	10.9840548810315	0.363973988599151	-1.45809274297959	0.0107994471243426	0.0484251132122859	Down	0.61026	1.00687	1.02003	0.257662	0.412054	0.14407	DCC1	sister chromatid cohesion protein DCC1-like	GO:0000775,GO:0000785,GO:0005654,GO:0006260,GO:0006275,GO:0007064,GO:0031390,GO:0034088,GO:0035753	chromosome, centromeric region|chromatin|nucleoplasm|DNA replication|regulation of DNA replication|mitotic sister chromatid cohesion|Ctf18 RFC-like complex|maintenance of mitotic sister chromatid cohesion|maintenance of DNA trinucleotide repeats
LOC103412579	33.0240897519393	58.4353753740809	7.6128041297977	0.130277320562475	-2.94034214190905	3.59685565524598e-09	8.57506952677476e-08	Down	1.08943	1.04902	0.845276	0.155475	0.0874214	0.0616387	At3g14460	putative disease resistance protein RGA4
LOC103412602	737.745516599211	449.504701616511	1025.98633158191	2.2824818692491	1.19060340029786	5.32513251535826e-09	1.22715096677453e-07	Up	16.5858	9.55046	10.8046	36.5514	38.5476	29.9301	DSP1	tyrosine-protein phosphatase DSP1-like	GO:0004725,GO:0005737,GO:0016791	protein tyrosine phosphatase activity|cytoplasm|phosphatase activity
LOC103412608	84.6617980808048	12.9337919744106	156.389804187199	12.0915663787244	3.59592924273663	8.3400991885891e-24	9.51887698729126e-22	Up	0.13151	0.281518	0.565569	3.28743	3.43295	3.94126	TLP1	thaumatin-like protein 1b	GO:0006952,GO:0009617,GO:0009723	defense response|response to bacterium|response to ethylene
LOC103412614	13.9795933584162	22.6993798823485	5.25980683448399	0.231715882184699	-2.1095711626232	0.0026513524325014	0.0153021515067122	Down	0.441274	0.425125	0.827158	0.0380522	0.1027	0.191091	At1g53440	probable LRR receptor-like serine/threonine-protein kinase At1g53440
LOC103412644	35.7258686169787	60.8609834619421	10.5907537720153	0.174015488570571	-2.52271237335657	1.00968997225586e-05	0.000122780672381281	Down	1.27052	1.79572	2.17243	0.260373	0.61785	0.116108	MYB5	transcription repressor MYB5-like	GO:0003700,GO:0005634,GO:0010090,GO:0010214,GO:0010468,GO:0030154,GO:0043565,GO:0044212,GO:0048354	DNA-binding transcription factor activity|nucleus|trichome morphogenesis|seed coat development|regulation of gene expression|cell differentiation|sequence-specific DNA binding|transcription regulatory region DNA binding|mucilage biosynthetic process involved in seed coat development
LOC103412656	457.889598573591	66.3767011322817	849.4024960149	12.7966964541087	3.67769951258067	0.0356864040078733	0.123439786682764	Up	5.47638	8.2903	3.74463	10.1648	130.753	54.295	DIR19	dirigent protein 22-like	GO:0048046	apoplast
LOC103412658	83.8266654415922	33.5287341175424	134.124596765642	4.00028811989855	2.0001039135448	6.30338835277718e-10	1.69828279132909e-08	Up	0.259498	0.323016	0.390672	1.16921	0.649459	1.40056	PES	phosphoenolpyruvate carboxykinase (ATP)-like	GO:0000463,GO:0000466,GO:0005654,GO:0030687,GO:0043021,GO:0070545,GO:2000232	maturation of LSU-rRNA from tricistronic rRNA transcript (SSU-rRNA, 5.8S rRNA, LSU-rRNA)|maturation of 5.8S rRNA from tricistronic rRNA transcript (SSU-rRNA, 5.8S rRNA, LSU-rRNA)|nucleoplasm|preribosome, large subunit precursor|ribonucleoprotein complex binding|PeBoW complex|regulation of rRNA processing
LOC103412659	150.422401056498	74.7608124579683	226.083989655028	3.02409754819259	1.59650467726529	3.42788960260384e-07	5.7742312364605e-06	Up	3.75467	5.59285	4.78062	10.2899	15.1561	11.2175		uncharacterized LOC103412659
LOC103412678	19.5189098401789	32.1497251468485	6.88809453350944	0.214250495207878	-2.22262955597258	0.0193301502097198	0.0767435024075291	Down	0.251734	0.143379	0.486619	0.0992636	0.0398075	0.0111691	CMT3	neurofilament heavy polypeptide-like	GO:0003677,GO:0003682,GO:0003886,GO:0005634,GO:0006306,GO:0006342,GO:0010069,GO:0010216,GO:0010424,GO:0010425,GO:0045814,GO:0051567	DNA binding|chromatin binding|DNA (cytosine-5-)-methyltransferase activity|nucleus|DNA methylation|chromatin silencing|zygote asymmetric cytokinesis in embryo sac|maintenance of DNA methylation|DNA methylation on cytosine within a CG sequence|DNA methylation on cytosine within a CNG sequence|negative regulation of gene expression, epigenetic|histone H3-K9 methylation	path:mdm00270	Cysteine and methionine metabolism
LOC103412684	28.5671063612066	40.162225201745	16.9719875206682	0.422585836203389	-1.24268368156995	0.0107970066767674	0.0484251132122859	Down	0.260723	0.284772	0.380299	0.179656	0.146715	0.0998625	UGT92A1	UDP-glycosyltransferase 92A1-like	GO:0008194,GO:0016758,GO:0043231	UDP-glycosyltransferase activity|transferase activity, transferring hexosyl groups|intracellular membrane-bounded organelle
LOC103412686	66.6526254422699	23.0786008007158	110.226650083824	4.7761409383365	2.25584540947522	2.21760412394342e-06	3.15293494620499e-05	Up	0.112198	0.443653	0.172223	1.17178	0.670121	1.21028	At4g27190	disease resistance protein At4g27190-like			path:mdm04626	Plant-pathogen interaction
LOC103412688	15.9559402040015	1.29675960405279	30.6151208039501	23.6089408617203	4.56126141608891	1.50711588382522e-05	0.000176744698511704	Up	0.0937088	0	0.103425	1.80404	0.43008	1.82315		uncharacterized LOC103412688
LOC103412703	94.3263894488035	58.0092319913422	130.643546906265	2.25211647218089	1.17128144086957	0.000935502751933595	0.00638724088048868	Up	3.40665	2.34957	1.75518	4.1868	6.02188	4.46413	BPS1	protein BPS1, chloroplastic-like	GO:0005886,GO:0009507,GO:0009793,GO:0048364,GO:0048367	plasma membrane|chloroplast|embryo development ending in seed dormancy|root development|shoot system development
LOC103412707	18.1999833161446	36.3999666322891	0	0	-Inf	2.37299932260759e-11	7.91812084212561e-10	Down	1.63508	0.72135	1.3342	0	0	0	DRT100	DNA damage-repair/toleration protein DRT100-like	GO:0000166,GO:0006281,GO:0009507	nucleotide binding|DNA repair|chloroplast
LOC103412711	93.729473722623	22.1778634059956	165.28108403925	7.45252511540711	2.89772933218387	9.49197132219902e-09	2.09894926491647e-07	Up	0.114941	0.118691	0.121575	0.794489	0.66362	1.22669	At3g14460	putative disease resistance protein At3g14460
LOC103412715	16.6036421668773	27.3213864160785	5.88589791767602	0.215431890169827	-2.21469626847576	0.00124160693457031	0.00812143164106346	Down	0.37728	0.958958	0.783067	0.150982	0.136663	0.0918957	AGL15	agamous-like MADS-box protein AGL15	GO:0000977,GO:0003677,GO:0003700,GO:0004601,GO:0005634,GO:0005737,GO:0009793,GO:0009910,GO:0010047,GO:0010227,GO:0010262,GO:0010629,GO:0042803,GO:0043565,GO:0045487,GO:0045892,GO:0045893,GO:0045944,GO:0048577,GO:0060862,GO:0060867,GO:0071365,GO:2000692	RNA polymerase II regulatory region sequence-specific DNA binding|DNA binding|DNA-binding transcription factor activity|peroxidase activity|nucleus|cytoplasm|embryo development ending in seed dormancy|negative regulation of flower development|fruit dehiscence|floral organ abscission|somatic embryogenesis|negative regulation of gene expression|protein homodimerization activity|sequence-specific DN…
LOC103412727	425.976503625844	585.794024184002	266.158983067686	0.454355920476383	-1.13810521689951	8.62184393824619e-08	1.61048489542369e-06	Down	6.61188	5.95705	6.01873	2.2135	2.00129	2.77913	RPPL1	putative disease resistance RPP13-like protein 1
LOC103412741	92.4430872440323	151.083260591563	33.8029138965017	0.223736989552299	-2.16012430370204	0.0407658033536338	0.136940977893609	Down	13.6596	4.04317	4.43669	1.80712	1.18517	1.32765	RMA1H1	E3 ubiquitin-protein ligase RMA1H1-like	GO:0004842,GO:0005789,GO:0006970,GO:0009409,GO:0009414,GO:0009611,GO:0009723,GO:0016021,GO:0016567,GO:0043161,GO:0046872	ubiquitin-protein transferase activity|endoplasmic reticulum membrane|response to osmotic stress|response to cold|response to water deprivation|response to wounding|response to ethylene|integral component of membrane|protein ubiquitination|proteasome-mediated ubiquitin-dependent protein catabolic process|metal ion binding	path:mdm04141	Protein processing in endoplasmic reticulum
LOC103412774	29.5949789448558	2.49694149077517	56.6930163989365	22.704983920683	4.50493710995575	1.66964750161928e-06	2.44954863724408e-05	Up	0	0.0922773	0.0537738	1.13278	1.61836	0.639614	CIPK11	CBL-interacting serine/threonine-protein kinase 11-like	GO:0004672,GO:0004674,GO:0005524,GO:0006468,GO:0007165,GO:0009268	protein kinase activity|protein serine/threonine kinase activity|ATP binding|protein phosphorylation|signal transduction|response to pH
LOC103412791	164.255629189307	282.574222481628	45.9370358969849	0.162566264868592	-2.62090018898913	1.41641133998258e-20	1.21844999246572e-18	Down	6.83729	4.92875	5.86478	1.3344	0.690219	0.662094	UGT87A2	UDP-glycosyltransferase 87A1-like	GO:0005634,GO:0005737,GO:0005829,GO:0008194,GO:0009909,GO:0043231,GO:0080043,GO:0080044	nucleus|cytoplasm|cytosol|UDP-glycosyltransferase activity|regulation of flower development|intracellular membrane-bounded organelle|quercetin 3-O-glucosyltransferase activity|quercetin 7-O-glucosyltransferase activity
LOC103412828	213.816797579805	422.457488734424	5.17610642518623	0.0122523722817473	-6.35079508154574	9.79266488173489e-72	9.15772112649982e-69	Down	10.3149	10.6146	7.96682	0.167075	0.107603	0.0482258	RPPL1	putative disease resistance RPP13-like protein 1
LOC103412831	310.484241944682	600.243389137353	20.7250947520104	0.0345278184267813	-4.85609700659099	1.24189195633308e-66	9.73039130110703e-64	Down	11.07	11.8475	10.053	0.205762	0.407373	0.283944	RPPL1	putative disease resistance protein At3g14460
LOC103412848	794.461230504861	1103.98739616405	484.935064845674	0.439257790922836	-1.18686021997742	2.3085547332783e-09	5.7298802840529e-08	Down	44.0836	34.703	35.2591	12.1894	12.8683	17.0751	TKPR1	cinnamoyl-CoA reductase 1-like	GO:0005634,GO:0005783,GO:0009555,GO:0010584,GO:0016491,GO:0016616,GO:0048316,GO:0050662,GO:0080110	nucleus|endoplasmic reticulum|pollen development|pollen exine formation|oxidoreductase activity|oxidoreductase activity, acting on the CH-OH group of donors, NAD or NADP as acceptor|seed development|coenzyme binding|sporopollenin biosynthetic process
LOC103412867	104.672399390948	55.9674618325266	153.377336949369	2.74047333803211	1.45442509882596	0.00105303292858626	0.00708292914146534	Up	0.82448	0.675815	0.573653	1.50962	1.15287	2.04647	RPPL1	putative disease resistance RPP13-like protein 1
LOC103412892	90.5463896642994	127.062487367557	54.0302919610416	0.425226147232162	-1.23369778371362	4.59205257387638e-05	0.000480243882094791	Down	2.81538	2.34091	2.6164	0.995936	0.572276	1.37196	RGA3	putative disease resistance protein RGA3	GO:0005524,GO:0006952,GO:0043531	ATP binding|defense response|ADP binding
LOC103412921	10.9476107677728	0.991281336031923	20.9039401995137	21.0877976207963	4.39833652489478	3.56150615281136e-06	4.82242239000473e-05	Up	0	0	0	0	0	0	TKPR1	cinnamoyl-CoA reductase 1-like	GO:0005634,GO:0005783,GO:0009555,GO:0010584,GO:0016491,GO:0016616,GO:0048316,GO:0050662,GO:0080110	nucleus|endoplasmic reticulum|pollen development|pollen exine formation|oxidoreductase activity|oxidoreductase activity, acting on the CH-OH group of donors, NAD or NADP as acceptor|seed development|coenzyme binding|sporopollenin biosynthetic process
LOC103412934	45.1467795189939	63.9508862315151	26.3426728064727	0.411920371378544	-1.27956261893596	0.0164699613864907	0.0675720606558683	Down	2.38585	1.06134	1.3947	0.461711	0.688926	0.646029	MAPKKK18	mitogen-activated protein kinase kinase kinase 18-like	GO:0004672,GO:0004674,GO:0004709,GO:0005524,GO:0005634,GO:0005737,GO:0006970,GO:0009737,GO:0009738,GO:0009789,GO:0023014,GO:0031098,GO:0032147,GO:0046777,GO:1900057,GO:1902457,GO:2000038	protein kinase activity|protein serine/threonine kinase activity|MAP kinase kinase kinase activity|ATP binding|nucleus|cytoplasm|response to osmotic stress|response to abscisic acid|abscisic acid-activated signaling pathway|positive regulation of abscisic acid-activated signaling pathway|signal transduction by protein phosphorylation|stress-activated protein kinase signaling cascade|activation of…
LOC103412960	3.97346061715451	0.601298231436806	7.34562300287222	12.2162724232862	3.61073223464146	0.0203323331989433	0.0797934668251477	Up	0	0.017425	0	0.0939284	0.101477	0.188309	At3g47110	probable LRR receptor-like serine/threonine-protein kinase At3g47570	GO:0004674,GO:0005524,GO:0005886,GO:0016021	protein serine/threonine kinase activity|ATP binding|plasma membrane|integral component of membrane
LOC103412976	61.6502776012146	34.7036133257235	88.5969418767056	2.55296014985951	1.35217101833697	0.000493622912044615	0.00371498655767742	Up	0.612185	2.60397	1.41445	3.52178	2.71408	3.88744	EFR	putative receptor-like protein kinase At3g47110
LOC103412986	100.403798062657	157.442487805336	43.3651083199773	0.27543459789326	-1.86021830420901	7.92963716636213e-10	2.11286931482388e-08	Down	6.05805	4.89102	3.48938	1.37692	1.52271	1.79424		uncharacterized LOC103412986
LOC103412998	389.990201139945	241.434869202166	538.545533077725	2.2306037850182	1.15743427505509	7.44337137827376e-08	1.41127100232934e-06	Up	3.73002	5.86286	5.64018	11.2026	9.48484	10.0303	At5g60050	BTB/POZ domain-containing protein At5g60050-like	GO:0016567	protein ubiquitination
LOC103412999	1189.03702177502	497.386503085946	1880.6875404641	3.78113907151825	1.91882091309132	0.000253512439522617	0.00209860811586541	Up	3.22894	7.42195	1.9604	12.3796	10.7138	19.8586	PHOT1	phototropin-1	GO:0000155,GO:0003729,GO:0004672,GO:0004674,GO:0005524,GO:0005634,GO:0005737,GO:0005773,GO:0005886,GO:0006468,GO:0007623,GO:0009637,GO:0009638,GO:0009882,GO:0009898,GO:0009903,GO:0009904,GO:0009986,GO:0010119,GO:0010155,GO:0010181,GO:0010362,GO:0016301,GO:0018298,GO:0042802,GO:0046777	phosphorelay sensor kinase activity|mRNA binding|protein kinase activity|protein serine/threonine kinase activity|ATP binding|nucleus|cytoplasm|vacuole|plasma membrane|protein phosphorylation|circadian rhythm|response to blue light|phototropism|blue light photoreceptor activity|cytoplasmic side of plasma membrane|chloroplast avoidance movement|chloroplast accumulation movement|cell surface|regula…
LOC103413011	25.8335032284917	13.8129095833007	37.8540968736828	2.74048683555035	1.45443220444323	0.0111071468645906	0.0495226372815259	Up	0.489868	0.410858	0.102238	1.18448	0.568991	1.11464	RSS3	uncharacterized LOC103413011	GO:0005634,GO:0005737	nucleus|cytoplasm
LOC103413017	129.064933076477	81.8748836234838	176.254982529471	2.15273567092945	1.10617118543614	4.26082983913263e-05	0.000449005659892603	Up	2.28582	2.36947	2.83885	4.50113	6.3909	5.38622	SEN1	tRNA-splicing endonuclease subunit Sen2-1-like	GO:0000213,GO:0000214,GO:0000379,GO:0003676,GO:0006397,GO:0010069,GO:0016829	tRNA-intron endonuclease activity|tRNA-intron endonuclease complex|tRNA-type intron splice site recognition and cleavage|nucleic acid binding|mRNA processing|zygote asymmetric cytokinesis in embryo sac|lyase activity
LOC103413029	19.9542473545803	10.7496255155161	29.1588691936445	2.71254744191381	1.43964837022633	0.0367670483996465	0.12633361776766	Up	0.359268	0.196634	0.258196	0.504919	0.382028	0.854148	At5g49770	probable serine/threonine-protein kinase PBL28
LOC103413034	15.2164158235791	8.8443239515728	21.5885076955854	2.44094492849804	1.28743974604941	0.0447785326953613	0.147196922875442	Up	0.122162	0.0940635	0.123414	0.254323	0.205588	0.28104	DSC1	disease resistance-like protein DSC1	GO:0005524,GO:0007165,GO:0009626,GO:0042742,GO:0043531	ATP binding|signal transduction|plant-type hypersensitive response|defense response to bacterium|ADP binding
LOC103413048	43.1241244820537	61.3114370411301	24.9368119229774	0.406723657549386	-1.29787918563013	0.00128978541346591	0.00838360518752844	Down	2.96468	2.35317	2.43157	1.2399	0.947296	0.612155	SKIP23	F-box protein SKIP23-like	GO:0005634,GO:0016567	nucleus|protein ubiquitination
LOC103413064	36.1579974876352	51.5530928616459	20.7629021136245	0.402747943161167	-1.3120508737985	0.00252591107335577	0.0147306702910046	Down	3.90207	3.7627	3.80063	1.52003	1.45945	0.729951		uncharacterized LOC103413064
LOC103413070	657.054221847726	886.096227904911	428.012215790542	0.483031303273387	-1.0498114076609	0.000410234642519168	0.00317816736681739	Down	22.3195	15.2694	14.7421	8.42144	4.70923	9.44296	INVE	alkaline/neutral invertase E, chloroplastic-like	GO:0004575,GO:0005982,GO:0005987,GO:0009507,GO:0033926,GO:0048825	sucrose alpha-glucosidase activity|starch metabolic process|sucrose catabolic process|chloroplast|glycopeptide alpha-N-acetylgalactosaminidase activity|cotyledon development
LOC103413073	19.8853203745625	9.76317333178662	30.0074674173383	3.07353627735369	1.61989951349049	0.00424251153731356	0.0227423094428107	Up	0.167256	0.0301664	0.0820866	0.250175	0.283653	0.196675	PDR2	pleiotropic drug resistance protein 2-like	GO:0005524,GO:0016021,GO:0016887	ATP binding|integral component of membrane|ATPase activity
LOC103413075	201.022842133391	299.765340563715	102.280343703067	0.341201366077634	-1.55130467206034	4.34459864597405e-10	1.19838168170112e-08	Down	5.54	3.51847	4.3858	1.00599	1.53697	0.356783		uncharacterized LOC103413075
LOC103413077	109.574491707175	25.7179439202887	193.43103949406	7.52124820295079	2.91097210695255	1.0936311640091e-20	9.57835874459937e-19	Up	0.377807	0.364599	0.675618	2.81098	3.37954	3.11227	LIG1	DNA ligase 1-like	GO:0000012,GO:0003677,GO:0003910,GO:0005524,GO:0005634,GO:0005730,GO:0005737,GO:0005739,GO:0006260,GO:0006273,GO:0006302,GO:0006310,GO:0007049,GO:0046872,GO:0051103,GO:0051301,GO:0071897,GO:0080111	single strand break repair|DNA binding|DNA ligase (ATP) activity|ATP binding|nucleus|nucleolus|cytoplasm|mitochondrion|DNA replication|lagging strand elongation|double-strand break repair|DNA recombination|cell cycle|metal ion binding|DNA ligation involved in DNA repair|cell division|DNA biosynthetic process|DNA demethylation	path:mdm03030,path:mdm03410,path:mdm03420,path:mdm03430	DNA replication|Base excision repair|Nucleotide excision repair|Mismatch repair
LOC103413078	1249.31881156953	435.555912700274	2063.08171043879	4.73666330838789	2.2438711258812	2.04679794603985e-29	3.33352092447727e-27	Up	8.97732	16.0024	15.1713	58.7207	60.0617	51.2347		probable basic-leucine zipper transcription factor R
LOC103413083	53.3313465570995	78.616140944418	28.046552169781	0.356753102261913	-1.48700211971073	0.00151565361194465	0.00960410889842084	Down	3.83962	1.9366	2.6674	1.21535	0.449483	0.897876	ATAB2	protein TAB2 homolog, chloroplastic	GO:0003723,GO:0006412,GO:0009507,GO:0009658,GO:0009704,GO:0048564	RNA binding|translation|chloroplast|chloroplast organization|de-etiolation|photosystem I assembly
LOC103413146	118.003775237423	167.641356753654	68.3661937211923	0.407812219162931	-1.29402309181911	5.9192293421224e-06	7.63678053529721e-05	Down	3.52828	4.28045	4.48701	2.06018	2.16072	0.65083	RER4	protein RETICULATA-RELATED 4, chloroplastic-like	GO:0005739,GO:0007275,GO:0009507,GO:0009536,GO:0009706,GO:0009941,GO:0016021	mitochondrion|multicellular organism development|chloroplast|plastid|chloroplast inner membrane|chloroplast envelope|integral component of membrane
LOC103413150	105.53532033501	149.587975389049	61.4826652809706	0.411013419501576	-1.28274259652221	1.19880033369186e-05	0.000143078250713949	Down	3.86211	3.54833	4.05044	1.0723	1.00493	1.75125		uncharacterized LOC103413150
LOC103413206	67.3082554644577	110.915824332235	23.7006865966799	0.213681742342619	-2.22646445014199	6.98831169797144e-10	1.87584403818696e-08	Down	7.38279	4.8336	4.87844	1.21666	0.888309	1.13982	BZIP44	bZIP transcription factor 11-like	GO:0003700,GO:0005634,GO:0009845,GO:0043565,GO:0044212,GO:0045893,GO:0046982	DNA-binding transcription factor activity|nucleus|seed germination|sequence-specific DNA binding|transcription regulatory region DNA binding|positive regulation of transcription, DNA-templated|protein heterodimerization activity
LOC103413235	3.61891866672225	0	7.2378373334445	Inf	Inf	0.00260932777145573	0.0151198105325808	Up	0	0	0	0.689231	0.654387	0.245412		uncharacterized LOC103413235
LOC103413285	243.868100661673	9.27655947445504	478.45964184889	51.5772731438233	5.68866359570204	6.61705661543763e-72	6.50400264972649e-69	Up	0.386964	0.330689	0.53058	19.7671	18.1181	18.3592		uncharacterized LOC103413285
LOC103413348	95.0021120698509	190.004224139702	0	0	-Inf	1.52665528890488e-08	3.2566399429987e-07	Down	3.87934	12.5513	6.12611	0	0	0	AOP1	probable inactive 2-oxoglutarate-dependent dioxygenase AOP2	GO:0046872,GO:0051213	metal ion binding|dioxygenase activity
LOC103413349	5.38934386000802	9.09306234439916	1.68562537561689	0.185374883815147	-2.43148230642519	0.0414251622443109	0.138561838405743	Down	0.21667	0.417221	0.278602	0.0320176	0.116137	0	BAHD1	BAHD acyltransferase At5g47980-like	GO:0016747	transferase activity, transferring acyl groups other than amino-acyl groups
LOC103413400	454.283404642899	220.240724395779	688.326084890019	3.12533518393754	1.64401092330203	0.0157423374520389	0.0652330421290179	Up	9.05697	25.9295	9.30243	35.8834	63.7984	27.0732	SAG21	protein SENESCENCE-ASSOCIATED GENE 21, mitochondrial	GO:0000302,GO:0005739,GO:0006952,GO:0006979,GO:0009409,GO:0009414,GO:0009416,GO:0009611,GO:0009620,GO:0009625,GO:0009646,GO:0009723,GO:0009737,GO:0010150,GO:0042542,GO:0042631,GO:0048364,GO:1900055,GO:1900150,GO:1900424,GO:1902074,GO:2000028	response to reactive oxygen species|mitochondrion|defense response|response to oxidative stress|response to cold|response to water deprivation|response to light stimulus|response to wounding|response to fungus|response to insect|response to absence of light|response to ethylene|response to abscisic acid|leaf senescence|response to hydrogen peroxide|cellular response to water deprivation|root deve…
LOC103413424	27.2933369886085	45.5038388696034	9.08283510761357	0.199605908715559	-2.32477366705556	7.45087712359275e-06	9.38590357585664e-05	Down	1.49981	1.75664	2.25144	0.364275	0.259234	0.37344	PSRP2	30S ribosomal protein 2, chloroplastic-like	GO:0003697,GO:0003723,GO:0005840,GO:0009409,GO:0009414,GO:0009507,GO:0009535,GO:0009570,GO:0009579,GO:0009651,GO:0009941,GO:0010029,GO:0019843,GO:0080148,GO:1900140,GO:1901001,GO:1901259,GO:1990904	single-stranded DNA binding|RNA binding|ribosome|response to cold|response to water deprivation|chloroplast|chloroplast thylakoid membrane|chloroplast stroma|thylakoid|response to salt stress|chloroplast envelope|regulation of seed germination|rRNA binding|negative regulation of response to water deprivation|regulation of seedling development|negative regulation of response to salt stress|chlorop…	path:mdm03013,path:mdm03015,path:mdm03018	RNA transport|mRNA surveillance pathway|RNA degradation
LOC103413446	28.8101018345326	4.48191873899025	53.138284930075	11.8561464463425	3.56756326782823	7.93513691559952e-11	2.45506530611772e-09	Up	0.0622771	0.150895	0.210141	1.42559	1.69662	0.952215	SYP132	syntaxin-132-like	GO:0000149,GO:0005484,GO:0005886,GO:0006886,GO:0006887,GO:0006906,GO:0012505,GO:0016021,GO:0031201,GO:0048278	SNARE binding|SNAP receptor activity|plasma membrane|intracellular protein transport|exocytosis|vesicle fusion|endomembrane system|integral component of membrane|SNARE complex|vesicle docking	path:mdm04130	SNARE interactions in vesicular transport
LOC103413454	54.3667154957819	87.8444088958485	20.8890220957153	0.237795693070028	-2.0722055095043	5.32679903706061e-08	1.04481667174822e-06	Down	2.87191	2.20145	2.49953	0.840917	0.44925	0.439378	At3g03630	S-sulfo-L-cysteine synthase (O-acetyl-L-serine-dependent), chloroplastic-like	GO:0004124,GO:0005737,GO:0006535,GO:0009507,GO:0009543,GO:0009643,GO:0010310,GO:0015979,GO:0030170,GO:0031977,GO:0090322	cysteine synthase activity|cytoplasm|cysteine biosynthetic process from serine|chloroplast|chloroplast thylakoid lumen|photosynthetic acclimation|regulation of hydrogen peroxide metabolic process|photosynthesis|pyridoxal phosphate binding|thylakoid lumen|regulation of superoxide metabolic process	path:mdm00270	Cysteine and methionine metabolism
LOC103413468	64.4375347977223	11.4402577358296	117.434811859615	10.2650494920077	3.3596686781743	5.18659553294807e-18	3.65837967153685e-16	Up	0.298817	0.192265	0.178173	2.39433	2.37032	2.39858	OFUT20	O-fucosyltransferase 20-like
LOC103413479	56.0701365660621	89.6665216464646	22.4737514856596	0.250637039030784	-1.99632846363756	0.000336118468912052	0.00267547347989027	Down	2.56631	1.39062	1.50164	0.723872	0.34971	0.224618	SPCC23B6.04c	phosphatidylinositol transfer protein 3-like	GO:0005628,GO:0005886,GO:0120010,GO:0120014	prospore membrane|plasma membrane|intermembrane phospholipid transfer|intermembrane phospholipid transfer activity
LOC103413492	8.79877355065543	4.18368419942307	13.4138629018878	3.20623217778664	1.6808789013543	0.0445914748736827	0.146698463071727	Up	0.119022	0.114883	0.133918	0.367519	0.553207	0.247299		uncharacterized LOC103413492
LOC103413500	157.4559636532	51.9912083830475	262.920718923353	5.05702266018272	2.33828824310035	2.03905702707714e-10	5.94093097637854e-09	Up	1.49695	0.490304	1.43761	5.1264	4.53675	6.92454	EDA2	lysosomal Pro-X carboxypeptidase-like	GO:0005576,GO:0005773,GO:0006508,GO:0008236,GO:0008239,GO:0009561	extracellular region|vacuole|proteolysis|serine-type peptidase activity|dipeptidyl-peptidase activity|megagametogenesis
LOC103413593	7.31004041535665	1.63966113805832	12.980419692655	7.91652579387614	2.98486743540543	0.0361347145530462	0.124618769318678	Up	0.025566	0.0247538	0.0861026	0.424084	0.336673	0.0270732	NSE4A	non-structural maintenance of chromosomes element 4 homolog A-like	GO:0005634,GO:0006281,GO:0006310,GO:0030915,GO:2001022	nucleus|DNA repair|DNA recombination|Smc5-Smc6 complex|positive regulation of response to DNA damage stimulus
LOC103413612	192.99918179673	290.400906243692	95.5974573497671	0.329191318947007	-1.60300180371238	1.33179535777324e-10	3.95987153044576e-09	Down	8.59209	9.56377	7.60806	2.23256	2.51335	2.41149	SKL2	probable inactive shikimate kinase like 2, chloroplastic	GO:0000287,GO:0009507,GO:0016310	magnesium ion binding|chloroplast|phosphorylation
LOC103413615	99.9964968318704	58.2071582141806	141.78583544956	2.43588314220463	1.28444492380018	6.00038401616754e-05	0.000604837039738168	Up	0.467041	0.708647	0.577519	1.0056	1.54833	1.11463	EFR3	uncharacterized LOC103413615	GO:0005886,GO:0072659	plasma membrane|protein localization to plasma membrane
LOC103413636	65.3447430886055	99.7543784559511	30.9351077212599	0.310112781013618	-1.68913510835965	1.23915718656062e-06	1.86420170412e-05	Down	1.82881	1.21855	1.52907	0.417989	0.378827	0.466112	N	TMV resistance protein N-like	GO:0005524,GO:0005737,GO:0007165,GO:0009626,GO:0043531	ATP binding|cytoplasm|signal transduction|plant-type hypersensitive response|ADP binding
LOC103413641	117.156743270066	176.590818174258	57.7226683658733	0.326872421582605	-1.61320043367206	1.60946594943236e-08	3.41922790074045e-07	Down	3.47968	2.8088	2.71348	1.34722	1.31425	0.942257	CYCC1-2	cyclin-C1-2-like	GO:0000307,GO:0005634,GO:0007049,GO:0016538,GO:0016592,GO:0045737,GO:0045944,GO:0051301,GO:1901409	cyclin-dependent protein kinase holoenzyme complex|nucleus|cell cycle|cyclin-dependent protein serine/threonine kinase regulator activity|mediator complex|positive regulation of cyclin-dependent protein serine/threonine kinase activity|positive regulation of transcription by RNA polymerase II|cell division|positive regulation of phosphorylation of RNA polymerase II C-terminal domain
LOC103413658	23.1496122934213	4.919036449581	41.3801881372616	8.41225483108309	3.07249255406057	1.85395703379618e-07	3.29933790115109e-06	Up	0.206862	0.0665931	0	1.1617	1.06581	1.30027		uncharacterized LOC103413658
[truncated: 3,858 more rows]
