# Supplementary material for: Expression Profiling Uncovers Novel Genes Associated with Plant Hormone Signal Transduction Involved in Regulation of Anthocyanin Biosynthesis in Red-Fleshed Apple Cultivars
Source: Preprints.org preprint supplement (doi:10.20944/preprints202401.0732.v1), 2024-01-10
Supplement: Supplementary file 3 [file Supplementary Table S4.xlsx]

## Sheet: enrichment-go-Red_Love-vs-Early
id	term	category	ListHits	ListTotal	PopHits	PopTotal	pval	padj	Enrichment_score	Gene
GO:0048838	release of seed from dormancy	biological_process	1	3500	1	25472	0	0	7.27771	CYP707A
GO:0009661	chromoplast organization	biological_process	1	3500	1	25472	0	0	7.27771	LOC103400029
GO:0003913	DNA photolyase activity	molecular_function	2	3500	2	25472	0	0	7.27771	LOC103400222; LOC103433070
GO:0001735	prenylcysteine oxidase activity	molecular_function	1	3500	1	25472	0	0	7.27771	LOC103400276
GO:0030327	prenylated protein catabolic process	biological_process	1	3500	1	25472	0	0	7.27771	LOC103400276
GO:0030328	prenylcysteine catabolic process	biological_process	1	3500	1	25472	0	0	7.27771	LOC103400276
GO:0045338	farnesyl diphosphate metabolic process	biological_process	2	3500	2	25472	0	0	7.27771	LOC103400276; LOC103414696
GO:0102149	farnesylcysteine lyase activity	molecular_function	1	3500	1	25472	0	0	7.27771	LOC103400276
GO:0071398	cellular response to fatty acid	biological_process	1	3500	1	25472	0	0	7.27771	LOC103400792
GO:0051574	positive regulation of histone H3-K9 methylation	biological_process	2	3500	2	25472	0	0	7.27771	LOC103401167; LOC103401564
GO:0090241	negative regulation of histone H4 acetylation	biological_process	2	3500	2	25472	0	0	7.27771	LOC103401167; LOC103401564
GO:0051743	red chlorophyll catabolite reductase activity	molecular_function	1	3500	1	25472	0	0	7.27771	LOC103401375
GO:0036503	ERAD pathway	biological_process	2	3500	2	25472	0	0	7.27771	LOC103401648; LOC103447544
GO:0042903	tubulin deacetylase activity	molecular_function	1	3500	1	25472	0	0	7.27771	LOC103401786
GO:0043014	alpha-tubulin binding	molecular_function	1	3500	1	25472	0	0	7.27771	LOC103401786
GO:0051721	protein phosphatase 2A binding	molecular_function	1	3500	1	25472	0	0	7.27771	LOC103401786
GO:0090042	tubulin deacetylation	biological_process	1	3500	1	25472	0	0	7.27771	LOC103401786
GO:0006725	cellular aromatic compound metabolic process	biological_process	2	3500	2	25472	0	0	7.27771	LOC103401823; LOC103444109
GO:0016701	oxidoreductase activity, acting on single donors with incorporation of molecular oxygen	molecular_function	2	3500	2	25472	0	0	7.27771	LOC103401823; LOC103444109
GO:0009703	nitrate reductase (NADH) activity	molecular_function	2	3500	2	25472	0	0	7.27771	LOC103401883; LOC103439424
GO:0050464	nitrate reductase (NADPH) activity	molecular_function	2	3500	2	25472	0	0	7.27771	LOC103401883; LOC103439424
GO:0003785	actin monomer binding	molecular_function	2	3500	2	25472	0	0	7.27771	LOC103401888; LOC103439427
GO:0016307	phosphatidylinositol phosphate kinase activity	molecular_function	2	3500	2	25472	0	0	7.27771	LOC103401888; LOC103439427
GO:0033955	mitochondrial DNA inheritance	biological_process	2	3500	2	25472	0	0	7.27771	LOC103402596; LOC103451580
GO:0047312	L-phenylalanine:pyruvate aminotransferase activity	molecular_function	2	3500	2	25472	0	0	7.27771	LOC103403054; LOC103452013
GO:0050048	L-leucine:2-oxoglutarate aminotransferase activity	molecular_function	2	3500	2	25472	0	0	7.27771	LOC103403054; LOC103452013
GO:0080098	L-tyrosine:pyruvate aminotransferase activity	molecular_function	2	3500	2	25472	0	0	7.27771	LOC103403054; LOC103452013
GO:0080099	L-methionine:2-oxoglutarate aminotransferase activity	molecular_function	2	3500	2	25472	0	0	7.27771	LOC103403054; LOC103452013
GO:0080100	L-glutamine:2-oxoglutarate aminotransferase activity	molecular_function	2	3500	2	25472	0	0	7.27771	LOC103403054; LOC103452013
GO:0080130	L-phenylalanine:2-oxoglutarate aminotransferase activity	molecular_function	2	3500	2	25472	0	0	7.27771	LOC103403054; LOC103452013
GO:0071244	cellular response to carbon dioxide	biological_process	1	3500	1	25472	0	0	7.27771	LOC103405169
GO:1990251	Mmi1 nuclear focus	cellular_component	1	3500	1	25472	0	0	7.27771	LOC103405309
GO:0000725	recombinational repair	biological_process	2	3500	2	25472	0	0	7.27771	LOC103405483; LOC114822098
GO:0070716	mismatch repair involved in maintenance of fidelity involved in DNA-dependent DNA replication	biological_process	2	3500	2	25472	0	0	7.27771	LOC103405483; LOC114822098
GO:0090657	telomeric loop disassembly	biological_process	2	3500	2	25472	0	0	7.27771	LOC103405483; LOC114822098
GO:1904430	negative regulation of t-circle formation	biological_process	2	3500	2	25472	0	0	7.27771	LOC103405483; LOC114822098
GO:0080037	negative regulation of cytokinin-activated signaling pathway	biological_process	1	3500	1	25472	0	0	7.27771	LOC103405497
GO:0050513	glycoprotein 2-beta-D-xylosyltransferase activity	molecular_function	2	3500	2	25472	0	0	7.27771	LOC103407929; LOC103448450
GO:0047100	glyceraldehyde-3-phosphate dehydrogenase (NADP+) (phosphorylating) activity	molecular_function	3	3500	3	25472	0	0	7.27771	LOC103409404; LOC103425757; LOC103442070
GO:0006076	(1->3)-beta-D-glucan catabolic process	biological_process	2	3500	2	25472	0	0	7.27771	LOC103409407; LOC103446204
GO:0051554	flavonol metabolic process	biological_process	1	3500	1	25472	0	0	7.27771	LOC103409912
GO:0080003	thalianol metabolic process	biological_process	1	3500	1	25472	0	0	7.27771	LOC103409912
GO:0080004	thalian-diol desaturase activity	molecular_function	1	3500	1	25472	0	0	7.27771	LOC103409912
GO:0047183	anthocyanin 5-aromatic acyltransferase activity	molecular_function	1	3500	1	25472	0	0	7.27771	LOC103409915
GO:0102777	caffeoyl-CoA:pelargonidin-3,5-diglucoside 5-O-glucoside-6-O-hydroxycinnamoyltransferase activity	molecular_function	1	3500	1	25472	0	0	7.27771	LOC103409915
GO:0102815	caffeoyl-CoA:delphinidin-3,5-diglucoside 5-O-glucoside-6-O-hydroxycinnamoyltransferase activity	molecular_function	1	3500	1	25472	0	0	7.27771	LOC103409915
GO:0035657	eRF1 methyltransferase complex	cellular_component	1	3500	1	25472	0	0	7.27771	LOC103412304
GO:0032450	maltose alpha-glucosidase activity	molecular_function	2	3500	2	25472	0	0	7.27771	LOC103412329; LOC103451194
GO:0010362	negative regulation of anion channel activity by blue light	biological_process	2	3500	2	25472	0	0	7.27771	LOC103412999; LOC103428062
GO:0000213	tRNA-intron endonuclease activity	molecular_function	2	3500	2	25472	0	0	7.27771	LOC103413017; LOC103429993
GO:0000214	tRNA-intron endonuclease complex	cellular_component	2	3500	2	25472	0	0	7.27771	LOC103413017; LOC103429993
GO:0000379	tRNA-type intron splice site recognition and cleavage	biological_process	2	3500	2	25472	0	0	7.27771	LOC103413017; LOC103429993
GO:0046422	violaxanthin de-epoxidase activity	molecular_function	2	3500	2	25472	0	0	7.27771	LOC103414012; LOC103422031
GO:0044550	secondary metabolite biosynthetic process	biological_process	1	3500	1	25472	0	0	7.27771	LOC103414401
GO:1900602	endocrocin biosynthetic process	biological_process	1	3500	1	25472	0	0	7.27771	LOC103414401
GO:0007204	positive regulation of cytosolic calcium ion concentration	biological_process	1	3500	1	25472	0	0	7.27771	LOC103414741
GO:0030834	regulation of actin filament depolymerization	biological_process	1	3500	1	25472	0	0	7.27771	LOC103414741
GO:0050848	regulation of calcium-mediated signaling	biological_process	1	3500	1	25472	0	0	7.27771	LOC103414741
GO:0050850	positive regulation of calcium-mediated signaling	biological_process	1	3500	1	25472	0	0	7.27771	LOC103414741
GO:0004132	dCMP deaminase activity	molecular_function	1	3500	1	25472	0	0	7.27771	LOC103415158
GO:0036290	protein trans-autophosphorylation	biological_process	1	3500	1	25472	0	0	7.27771	LOC103415989
GO:0048314	embryo sac morphogenesis	biological_process	1	3500	1	25472	0	0	7.27771	LOC103416552
GO:0004147	dihydrolipoamide branched chain acyltransferase activity	molecular_function	1	3500	1	25472	0	0	7.27771	LOC103416775
GO:0043617	cellular response to sucrose starvation	biological_process	1	3500	1	25472	0	0	7.27771	LOC103416775
GO:0043754	dihydrolipoyllysine-residue (2-methylpropanoyl)transferase activity	molecular_function	1	3500	1	25472	0	0	7.27771	LOC103416775
GO:0009780	photosynthetic NADP+ reduction	biological_process	1	3500	1	25472	0	0	7.27771	LOC103417553
GO:0004723	calcium-dependent protein serine/threonine phosphatase activity	molecular_function	2	3500	2	25472	0	0	7.27771	LOC103417881; LOC103439871
GO:0005955	calcineurin complex	cellular_component	2	3500	2	25472	0	0	7.27771	LOC103417881; LOC103439871
GO:0042539	hypotonic salinity response	biological_process	4	3500	4	25472	0	0	7.27771	LOC103417881; LOC103439871; LOC114821175; LOC114825669
GO:0009512	cytochrome b6f complex	cellular_component	1	3500	1	25472	0	0	7.27771	LOC103418930
GO:1903424	fluoride transmembrane transport	biological_process	2	3500	2	25472	0	0	7.27771	LOC103419824; LOC103444305
GO:1903425	fluoride transmembrane transporter activity	molecular_function	2	3500	2	25472	0	0	7.27771	LOC103419824; LOC103444305
GO:0048834	specification of petal number	biological_process	2	3500	2	25472	0	0	7.27771	LOC103419892; LOC103445622
GO:0034059	response to anoxia	biological_process	1	3500	1	25472	0	0	7.27771	LOC103419936
GO:0018580	nitronate monooxygenase activity	molecular_function	1	3500	1	25472	0	0	7.27771	LOC103420111
GO:0016052	carbohydrate catabolic process	biological_process	1	3500	1	25472	0	0	7.27771	LOC103420476
GO:0050392	vicianin beta-glucosidase activity	molecular_function	1	3500	1	25472	0	0	7.27771	LOC103420476
GO:0009885	transmembrane histidine kinase cytokinin receptor activity	molecular_function	2	3500	2	25472	0	0	7.27771	LOC103422017; LOC103451518
GO:0008310	single-stranded DNA 3'-5' exodeoxyribonuclease activity	molecular_function	2	3500	2	25472	0	0	7.27771	LOC103422885; LOC103424256
GO:0010777	meiotic mismatch repair involved in reciprocal meiotic recombination	biological_process	2	3500	2	25472	0	0	7.27771	LOC103422994; LOC103433046
GO:0043073	germ cell nucleus	cellular_component	2	3500	2	25472	0	0	7.27771	LOC103422994; LOC103433046
GO:0045143	homologous chromosome segregation	biological_process	2	3500	2	25472	0	0	7.27771	LOC103422994; LOC103433046
GO:0033481	galacturonate biosynthetic process	biological_process	3	3500	3	25472	0	0	7.27771	LOC103425033; LOC103435476; LOC103443417
GO:0090353	polygalacturonase inhibitor activity	molecular_function	1	3500	1	25472	0	0	7.27771	LOC103425102
GO:0010922	positive regulation of phosphatase activity	biological_process	2	3500	2	25472	0	0	7.27771	LOC103425293; LOC103448114
GO:0019902	phosphatase binding	molecular_function	2	3500	2	25472	0	0	7.27771	LOC103425293; LOC103448114
GO:0042326	negative regulation of phosphorylation	biological_process	2	3500	2	25472	0	0	7.27771	LOC103425293; LOC103448114
GO:0047485	protein N-terminus binding	molecular_function	2	3500	2	25472	0	0	7.27771	LOC103425293; LOC103448114
GO:0008484	sulfuric ester hydrolase activity	molecular_function	1	3500	1	25472	0	0	7.27771	LOC103425883
GO:0010400	rhamnogalacturonan I side chain metabolic process	biological_process	2	3500	2	25472	0	0	7.27771	LOC103426557; LOC103456364
GO:0033925	mannosyl-glycoprotein endo-beta-N-acetylglucosaminidase activity	molecular_function	2	3500	2	25472	0	0	7.27771	LOC103427489; LOC103437613
GO:0004583	dolichyl-phosphate-glucose-glycolipid alpha-glucosyltransferase activity	molecular_function	2	3500	2	25472	0	0	7.27771	LOC103427573; LOC103430439
GO:0106073	dolichyl pyrophosphate Glc2Man9GlcNAc2 alpha-1,2-glucosyltransferase activity	molecular_function	2	3500	2	25472	0	0	7.27771	LOC103427573; LOC103430439
GO:0035402	histone kinase activity (H3-T11 specific)	molecular_function	1	3500	1	25472	0	0	7.27771	LOC103427672
GO:0035407	histone H3-T11 phosphorylation	biological_process	1	3500	1	25472	0	0	7.27771	LOC103427672
GO:0072354	histone kinase activity (H3-T3 specific)	molecular_function	1	3500	1	25472	0	0	7.27771	LOC103427672
GO:0072355	histone H3-T3 phosphorylation	biological_process	1	3500	1	25472	0	0	7.27771	LOC103427672
GO:0015415	ATPase-coupled phosphate ion transmembrane transporter activity	molecular_function	1	3500	1	25472	0	0	7.27771	LOC103428150
GO:0010007	magnesium chelatase complex	cellular_component	2	3500	2	25472	0	0	7.27771	LOC103431022; LOC103456287
GO:0018708	thiol S-methyltransferase activity	molecular_function	1	3500	1	25472	0	0	7.27771	LOC103431361
GO:0050792	regulation of viral process	biological_process	1	3500	1	25472	0	0	7.27771	LOC103431650
GO:0005274	allantoin:proton symporter activity	molecular_function	1	3500	1	25472	0	0	7.27771	LOC103431842
GO:0015505	uracil:cation symporter activity	molecular_function	1	3500	1	25472	0	0	7.27771	LOC103431842
GO:0015720	allantoin transport	biological_process	1	3500	1	25472	0	0	7.27771	LOC103431842
GO:0015857	uracil transport	biological_process	1	3500	1	25472	0	0	7.27771	LOC103431842
GO:0046906	tetrapyrrole binding	molecular_function	1	3500	1	25472	0	0	7.27771	LOC103432719
GO:0000719	photoreactive repair	biological_process	1	3500	1	25472	0	0	7.27771	LOC103433070
GO:0003904	deoxyribodipyrimidine photo-lyase activity	molecular_function	1	3500	1	25472	0	0	7.27771	LOC103433070
GO:0006968	cellular defense response	biological_process	1	3500	1	25472	0	0	7.27771	LOC103433118
GO:0006982	response to lipid hydroperoxide	biological_process	2	3500	2	25472	0	0	7.27771	LOC103433606; LOC103452951
GO:0010335	response to non-ionic osmotic stress	biological_process	2	3500	2	25472	0	0	7.27771	LOC103433606; LOC103452951
GO:0030410	nicotianamine synthase activity	molecular_function	2	3500	2	25472	0	0	7.27771	LOC103433868; LOC103450853
GO:0030418	nicotianamine biosynthetic process	biological_process	2	3500	2	25472	0	0	7.27771	LOC103433868; LOC103450853
GO:0030896	checkpoint clamp complex	cellular_component	1	3500	1	25472	0	0	7.27771	LOC103433915
GO:1990421	subtelomeric heterochromatin	cellular_component	1	3500	1	25472	0	0	7.27771	LOC103433915
GO:2000042	negative regulation of double-strand break repair via homologous recombination	biological_process	1	3500	1	25472	0	0	7.27771	LOC103433915
GO:0016628	oxidoreductase activity, acting on the CH-CH group of donors, NAD or NADP as acceptor	molecular_function	1	3500	1	25472	0	0	7.27771	LOC103434560
GO:0019500	cyanide catabolic process	biological_process	1	3500	1	25472	0	0	7.27771	LOC103436098
GO:0047558	3-cyanoalanine hydratase activity	molecular_function	1	3500	1	25472	0	0	7.27771	LOC103436098
GO:0051410	detoxification of nitrogen compound	biological_process	1	3500	1	25472	0	0	7.27771	LOC103436098
GO:0070987	error-free translesion synthesis	biological_process	1	3500	1	25472	0	0	7.27771	LOC103436119
GO:0008909	isochorismate synthase activity	molecular_function	1	3500	1	25472	0	0	7.27771	LOC103437799
GO:0016979	lipoate-protein ligase activity	molecular_function	1	3500	1	25472	0	0	7.27771	LOC103437830
GO:0005477	pyruvate secondary active transmembrane transporter activity	molecular_function	1	3500	1	25472	0	0	7.27771	LOC103437886
GO:0004352	glutamate dehydrogenase (NAD+) activity	molecular_function	2	3500	2	25472	0	0	7.27771	LOC103438445; LOC114824344
GO:0033542	fatty acid beta-oxidation, unsaturated, even number	biological_process	1	3500	1	25472	0	0	7.27771	LOC103440214
GO:0080023	3R-hydroxyacyl-CoA dehydratase activity	molecular_function	1	3500	1	25472	0	0	7.27771	LOC103440214
GO:0000225	N-acetylglucosaminylphosphatidylinositol deacetylase activity	molecular_function	1	3500	1	25472	0	0	7.27771	LOC103440777
GO:0000828	inositol hexakisphosphate kinase activity	molecular_function	1	3500	1	25472	0	0	7.27771	LOC103442791
GO:0000829	inositol heptakisphosphate kinase activity	molecular_function	1	3500	1	25472	0	0	7.27771	LOC103442791
GO:0000832	inositol hexakisphosphate 5-kinase activity	molecular_function	1	3500	1	25472	0	0	7.27771	LOC103442791
GO:0033857	diphosphoinositol-pentakisphosphate kinase activity	molecular_function	1	3500	1	25472	0	0	7.27771	LOC103442791
GO:0052723	inositol hexakisphosphate 1-kinase activity	molecular_function	1	3500	1	25472	0	0	7.27771	LOC103442791
GO:0052724	inositol hexakisphosphate 3-kinase activity	molecular_function	1	3500	1	25472	0	0	7.27771	LOC103442791
GO:0102092	5-diphosphoinositol pentakisphosphate 3-kinase activity	molecular_function	1	3500	1	25472	0	0	7.27771	LOC103442791
GO:1905036	positive regulation of antifungal innate immune response	biological_process	1	3500	1	25472	0	0	7.27771	LOC103442791
GO:0006139	nucleobase-containing compound metabolic process	biological_process	1	3500	1	25472	0	0	7.27771	LOC103443822
GO:0046976	histone methyltransferase activity (H3-K27 specific)	molecular_function	1	3500	1	25472	0	0	7.27771	LOC103443933
GO:0010178	IAA-amino acid conjugate hydrolase activity	molecular_function	1	3500	1	25472	0	0	7.27771	LOC103444396
GO:0016405	CoA-ligase activity	molecular_function	1	3500	1	25472	0	0	7.27771	LOC103444452
GO:0008193	tRNA guanylyltransferase activity	molecular_function	1	3500	1	25472	0	0	7.27771	LOC103444673
GO:0016730	oxidoreductase activity, acting on iron-sulfur proteins as donors	molecular_function	1	3500	1	25472	0	0	7.27771	LOC103444768
GO:0042371	vitamin K biosynthetic process	biological_process	1	3500	1	25472	0	0	7.27771	LOC103444873
GO:0046428	1,4-dihydroxy-2-naphthoate octaprenyltransferase activity	molecular_function	1	3500	1	25472	0	0	7.27771	LOC103444873
GO:0110095	cellular detoxification of aldehyde	biological_process	1	3500	1	25472	0	0	7.27771	LOC103446086
GO:0035970	peptidyl-threonine dephosphorylation	biological_process	1	3500	1	25472	0	0	7.27771	LOC103447289
GO:0048030	disaccharide binding	molecular_function	1	3500	1	25472	0	0	7.27771	LOC103449704
GO:0070492	oligosaccharide binding	molecular_function	1	3500	1	25472	0	0	7.27771	LOC103449704
GO:0033721	aldehyde dehydrogenase (NADP+) activity	molecular_function	1	3500	1	25472	0	0	7.27771	LOC103449962
GO:0030644	cellular chloride ion homeostasis	biological_process	1	3500	1	25472	0	0	7.27771	LOC103451145
GO:0030603	oxaloacetase activity	molecular_function	1	3500	1	25472	0	0	7.27771	LOC103453629
GO:0047776	citramalate lyase activity	molecular_function	1	3500	1	25472	0	0	7.27771	LOC103453629
GO:0015633	zinc-transporting ATPase activity	molecular_function	1	3500	1	25472	0	0	7.27771	LOC103453726
GO:0009974	zeinoxanthin epsilon hydroxylase activity	molecular_function	1	3500	1	25472	0	0	7.27771	LOC103454736
GO:0030794	(S)-coclaurine-N-methyltransferase activity	molecular_function	1	3500	1	25472	0	0	7.27771	LOC103455798
GO:0015671	oxygen transport	biological_process	1	3500	1	25472	0	0	7.27771	LOC103456053
GO:0009868	jasmonic acid and ethylene-dependent systemic resistance, jasmonic acid mediated signaling pathway	biological_process	2	3500	2	25472	0	0	7.27771	LOC114821175; LOC114825669
GO:0008897	holo-[acyl-carrier-protein] synthase activity	molecular_function	1	3500	1	25472	0	0	7.27771	LOC114821681
GO:0080184	response to phenylpropanoid	biological_process	1	3500	1	25472	0	0	7.27771	LOC114822146
GO:0048529	magnesium-protoporphyrin IX monomethyl ester (oxidative) cyclase activity	molecular_function	1	3500	1	25472	0	0	7.27771	LOC114822994
GO:0004157	dihydropyrimidinase activity	molecular_function	1	3500	1	25472	0	0	7.27771	LOC114823959
GO:0043531	ADP binding	molecular_function	123	3500	422	25472	3.02058e-17	6.5651e-16	2.12123	LOC103402155; LOC103402223; LOC103403664; LOC103404187; LOC103404266; LOC103404313; LOC103405913; LOC103406393; LOC103406408; LOC103406605; LOC103406767; LOC103406792; LOC103406876; LOC103407531; LOC103407627; LOC103407677; LOC103409239; LOC103409920; LOC103409937; LOC103410432; LOC103411333; LOC103411899; LOC103411952; LOC103412262; LOC103412412; LOC103412892; LOC103413034; LOC103413636; LOC1034…
GO:0009535	chloroplast thylakoid membrane	cellular_component	127	3500	478	25472	2.45036e-14	5.29309e-13	1.93362	LOC103400467; LOC103400502; LOC103401257; LOC103401375; LOC103401562; LOC103403170; LOC103403404; LOC103403579; LOC103405011; LOC103405098; LOC103405142; LOC103405453; LOC103405785; LOC103405853; LOC103405974; LOC103408692; LOC103409099; LOC103409987; LOC103411103; LOC103411496; LOC103412119; LOC103412182; LOC103413424; LOC103414012; LOC103414096; LOC103414957; LOC103415279; LOC103417553; LOC1034…
GO:0007165	signal transduction	biological_process	109	3500	395	25472	1.01605e-13	2.1814e-12	2.00828	BZIP12; LOC103402155; LOC103402223; LOC103403664; LOC103404187; LOC103404266; LOC103405913; LOC103406393; LOC103406408; LOC103406767; LOC103406792; LOC103406876; LOC103407531; LOC103407677; LOC103409239; LOC103409920; LOC103410432; LOC103411333; LOC103411899; LOC103411952; LOC103412262; LOC103412412; LOC103412774; LOC103413034; LOC103413636; LOC103415199; LOC103415813; LOC103416390; LOC103417012;…
GO:0015979	photosynthesis	biological_process	48	3500	124	25472	9.80417e-13	2.09215e-11	2.81718	LOC103401220; LOC103403404; LOC103403813; LOC103403814; LOC103405142; LOC103405453; LOC103407948; LOC103408692; LOC103410709; LOC103413454; LOC103414031; LOC103417553; LOC103417570; LOC103418930; LOC103420118; LOC103420312; LOC103423489; LOC103424027; LOC103424902; LOC103425043; LOC103425509; LOC103427372; LOC103427948; LOC103431022; LOC103431561; LOC103432238; LOC103435687; LOC103436772; LOC1034…
GO:0009626	plant-type hypersensitive response	biological_process	109	3500	443	25472	2.37952e-10	5.04716e-09	1.79068	LOC103402155; LOC103402223; LOC103402655; LOC103404187; LOC103404266; LOC103405913; LOC103406393; LOC103406408; LOC103406767; LOC103406792; LOC103406876; LOC103407531; LOC103407569; LOC103407627; LOC103407677; LOC103409239; LOC103409920; LOC103410432; LOC103411333; LOC103411899; LOC103411952; LOC103412262; LOC103412412; LOC103413034; LOC103413636; LOC103415199; LOC103415813; LOC103416390; LOC1034…
GO:0009523	photosystem II	cellular_component	23	3500	46	25472	6.9183e-10	1.45864e-08	3.63886	LOC103403170; LOC103403404; LOC103415279; LOC103419710; LOC103420312; LOC103421929; LOC103424902; LOC103425509; LOC103429652; LOC103433590; LOC103434978; LOC103435687; LOC103436772; LOC103436965; LOC103437223; LOC103437829; LOC103438778; LOC103442984; LOC103445710; LOC103450616; LOC103452146; LOC103453723; LOC114820509
GO:0009522	photosystem I	cellular_component	19	3500	35	25472	2.21153e-09	4.63499e-08	3.95076	LOC103403170; LOC103405098; LOC103415279; LOC103417570; LOC103419710; LOC103420118; LOC103421929; LOC103429202; LOC103429652; LOC103433590; LOC103434978; LOC103437223; LOC103437829; LOC103442984; LOC103446135; LOC103450616; LOC103452146; LOC114819557; LOC114820509
GO:0016168	chlorophyll binding	molecular_function	19	3500	36	25472	4.33124e-09	9.02385e-08	3.84102	LOC103403170; LOC103405098; LOC103415279; LOC103417570; LOC103419710; LOC103420118; LOC103421929; LOC103424902; LOC103429202; LOC103429652; LOC103433590; LOC103434978; LOC103436965; LOC103437223; LOC103437829; LOC103442984; LOC103450616; LOC103452146; LOC103453723
GO:0042555	MCM complex	cellular_component	13	3500	19	25472	4.91241e-09	1.01745e-07	4.97949	LOC103406461; LOC103408168; LOC103412403; LOC103415561; LOC103423906; LOC103432923; LOC103434984; LOC103438345; LOC103445117; LOC103445965; LOC103449277; LOC103451788; LOC114827546
GO:0016491	oxidoreductase activity	molecular_function	81	3500	350	25472	6.1295e-07	1.2621e-05	1.68427	LOC103400502; LOC103401753; LOC103406391; LOC103406512; LOC103406562; LOC103406680; LOC103407243; LOC103411496; LOC103412093; LOC103412848; LOC103412921; LOC103413696; LOC103413788; LOC103413791; LOC103413991; LOC103414680; LOC103414842; LOC103416663; LOC103417941; LOC103418902; LOC103420490; LOC103422016; LOC103422716; LOC103422717; LOC103423436; LOC103424888; LOC103424993; LOC103425955; LOC1034…
GO:0009507	chloroplast	cellular_component	413	3500	2439	25472	1.15459e-06	2.36354e-05	1.23235	LIS; LOC103400222; LOC103400239; LOC103400427; LOC103400467; LOC103400609; LOC103401220; LOC103401375; LOC103401379; LOC103401506; LOC103401562; LOC103401698; LOC103401762; LOC103401786; LOC103401954; LOC103402149; LOC103402171; LOC103402408; LOC103402574; LOC103402596; LOC103402630; LOC103402725; LOC103403002; LOC103403010; LOC103403122; LOC103403299; LOC103403404; LOC103403456; LOC103403493; LO…
GO:0006270	DNA replication initiation	biological_process	16	3500	36	25472	1.34632e-06	2.74011e-05	3.23454	LOC103402637; LOC103408168; LOC103412403; LOC103415561; LOC103420206; LOC103423906; LOC103427154; LOC103433335; LOC103434984; LOC103445117; LOC103445965; LOC103449277; LOC103451788; LOC103451820; LOC103456394; LOC114827546
GO:0004497	monooxygenase activity	molecular_function	58	3500	234	25472	1.92058e-06	3.88641e-05	1.80388	CYP707A; LOC103401541; LOC103404651; LOC103405784; LOC103405824; LOC103406468; LOC103406836; LOC103406950; LOC103409417; LOC103415328; LOC103416457; LOC103418398; LOC103418775; LOC103419418; LOC103420289; LOC103420971; LOC103422316; LOC103422635; LOC103422713; LOC103422998; LOC103425781; LOC103428002; LOC103428276; LOC103428639; LOC103432255; LOC103432823; LOC103436975; LOC103437230; LOC103437875…
GO:0005524	ATP binding	molecular_function	536	3500	3278	25472	2.2677e-06	4.56261e-05	1.19001	LOC103400515; LOC103400552; LOC103400609; LOC103400678; LOC103400900; LOC103401167; LOC103401506; LOC103401564; LOC103401888; LOC103401954; LOC103402025; LOC103402155; LOC103402202; LOC103402223; LOC103402408; LOC103402596; LOC103402602; LOC103402637; LOC103402819; LOC103402923; LOC103403033; LOC103403530; LOC103403536; LOC103403544; LOC103403664; LOC103403751; LOC103403793; LOC103403813; LOC1034…
GO:0009768	photosynthesis, light harvesting in photosystem I	biological_process	12	3500	24	25472	3.43357e-06	6.86908e-05	3.63886	LOC103405098; LOC103419710; LOC103420118; LOC103429202; LOC103429652; LOC103433590; LOC103434978; LOC103437223; LOC103450616; LOC103452146; LOC103453723; LOC114819557
GO:0009684	indoleacetic acid biosynthetic process	biological_process	7	3500	10	25472	4.37972e-06	8.71242e-05	5.0944	LOC103403054; LOC103408917; LOC103412168; LOC103414115; LOC103451331; LOC103452013; LOC114823393
GO:0010287	plastoglobule	cellular_component	29	3500	94	25472	4.88954e-06	9.67194e-05	2.24525	LOC103400467; LOC103403002; LOC103404163; LOC103405098; LOC103405453; LOC103408692; LOC103411496; LOC103411704; LOC103419710; LOC103420118; LOC103429202; LOC103429652; LOC103433557; LOC103433590; LOC103434978; LOC103437223; LOC103442465; LOC103443793; LOC103445722; LOC103450616; LOC103451149; LOC103452146; LOC103453319; LOC103453723; LOC103454258; LOC103456109; LOC114820549; LOC114825007; LOC1148…
GO:0003678	DNA helicase activity	molecular_function	11	3500	23	25472	1.37124e-05	0.000269728	3.48065	LOC103408168; LOC103411332; LOC103440063; LOC103440067; LOC103445117; LOC103445965; LOC103449277; LOC114819284; LOC114825907; LOC114826145; LOC114827546
GO:0043140	ATP-dependent 3'-5' DNA helicase activity	molecular_function	9	3500	17	25472	1.8242e-05	0.000356833	3.85291	LOC103413741; LOC103417767; LOC103426927; LOC103440063; LOC103440067; LOC114819284; LOC114825907; LOC114825962; LOC114826145
GO:0005615	extracellular space	cellular_component	36	3500	135	25472	2.14114e-05	0.000416516	1.94072	LOC103400937; LOC103405696; LOC103408080; LOC103408102; LOC103410311; LOC103412527; LOC103414835; LOC103417539; LOC103420967; LOC103421060; LOC103422296; LOC103423394; LOC103425895; LOC103426493; LOC103429545; LOC103430997; LOC103438473; LOC103439495; LOC103440288; LOC103440369; LOC103440470; LOC103440473; LOC103441630; LOC103443344; LOC103443354; LOC103444863; LOC103448789; LOC103448808; LOC1034…
GO:0000347	THO complex	cellular_component	11	3500	24	25472	2.39912e-05	0.000464138	3.33562	LOC103400826; LOC103408168; LOC103415561; LOC103417323; LOC103423906; LOC103445117; LOC103445965; LOC103449277; LOC103451788; LOC114821741; LOC114827546
GO:0009538	photosystem I reaction center	cellular_component	6	3500	9	25472	2.56541e-05	0.000490914	4.85181	LOC103405453; LOC103408692; LOC103423489; LOC103439960; LOC103443793; LOC103451149
GO:0010731	protein glutathionylation	biological_process	6	3500	9	25472	2.56541e-05	0.000490914	4.85181	LOC103408400; LOC103419315; LOC103422275; LOC103423404; LOC108171274; LOC114824380
GO:0048826	cotyledon morphogenesis	biological_process	5	3500	7	25472	4.14177e-05	0.000779849	5.19837	HD14; HD19; LOC103444424; LOC103448743; LOC108171042
GO:0047213	anthocyanidin 3-O-glucosyltransferase activity	molecular_function	5	3500	7	25472	4.14177e-05	0.000779849	5.19837	LOC103401840; LOC103410493; LOC103420802; LOC103440008; LOC103455522
GO:0036292	DNA rewinding	biological_process	5	3500	7	25472	4.14177e-05	0.000779849	5.19837	LOC103440063; LOC103440067; LOC114819284; LOC114825907; LOC114826145
GO:0016021	integral component of membrane	cellular_component	767	3500	4959	25472	4.59654e-05	0.000860873	1.12563	CYP707A; LOC103400017; LOC103400029; LOC103400054; LOC103400428; LOC103400502; LOC103400789; LOC103400855; LOC103401023; LOC103401096; LOC103401242; LOC103401294; LOC103401497; LOC103401541; LOC103401753; LOC103401951; LOC103402025; LOC103402171; LOC103402202; LOC103402458; LOC103402561; LOC103402588; LOC103402598; LOC103402615; LOC103402630; LOC103402759; LOC103402807; LOC103402959; LOC103402973…
GO:0004558	alpha-1,4-glucosidase activity	molecular_function	4	3500	5	25472	4.88601e-05	0.00089138	5.82217	LOC103403150; LOC103412329; LOC103431926; LOC103451194
GO:0010290	chlorophyll catabolite transmembrane transporter activity	molecular_function	4	3500	5	25472	4.88601e-05	0.00089138	5.82217	LOC103416673; LOC103427839; LOC103448442; LOC103452081
GO:0015431	glutathione S-conjugate-exporting ATPase activity	molecular_function	4	3500	5	25472	4.88601e-05	0.00089138	5.82217	LOC103416673; LOC103427839; LOC103448442; LOC103452081
GO:0030093	chloroplast photosystem I	cellular_component	4	3500	5	25472	4.88601e-05	0.00089138	5.82217	LOC103417553; LOC103432238; LOC114823931; LOC114826075
GO:0045430	chalcone isomerase activity	molecular_function	4	3500	5	25472	4.88601e-05	0.00089138	5.82217	LOC103421113; LOC103430446; LOC103448975; LOC103454421
GO:0009534	chloroplast thylakoid	cellular_component	44	3500	182	25472	5.01333e-05	0.000909894	1.75945	LOC103401562; LOC103403404; LOC103403579; LOC103405098; LOC103405453; LOC103405853; LOC103407948; LOC103408692; LOC103417553; LOC103420118; LOC103420753; LOC103421499; LOC103424576; LOC103429202; LOC103430349; LOC103432862; LOC103433590; LOC103437223; LOC103437937; LOC103438366; LOC103439651; LOC103440874; LOC103442529; LOC103443793; LOC103444768; LOC103445979; LOC103446135; LOC103446745; LOC1034…
GO:0009773	photosynthetic electron transport in photosystem I	biological_process	9	3500	19	25472	6.65751e-05	0.00120211	3.44734	LOC103403579; LOC103405853; LOC103417553; LOC103437832; LOC103444768; LOC114821976; LOC114823931; LOC114826075; LOC114827739
GO:0002239	response to oomycetes	biological_process	15	3500	42	25472	7.42846e-05	0.00133447	2.59918	LOC103406365; LOC103415736; LOC103417025; LOC103418043; LOC103421948; LOC103424916; LOC103436975; LOC103440793; LOC103440876; LOC103444963; LOC103448566; LOC103448568; LOC103449971; LOC114824505; LOC114825244
GO:0004032	alditol:NADP+ 1-oxidoreductase activity	molecular_function	6	3500	10	25472	7.52945e-05	0.00134575	4.36663	LOC103413788; LOC103413791; LOC103433453; LOC103433458; LOC103450272; LOC103450273
GO:0043138	3'-5' DNA helicase activity	molecular_function	8	3500	16	25472	7.90861e-05	0.00140637	3.63886	LOC103413741; LOC103426927; LOC103440063; LOC103440067; LOC114819284; LOC114825907; LOC114825962; LOC114826145
GO:0009813	flavonoid biosynthetic process	biological_process	26	3500	94	25472	0.000112185	0.00198494	2.01298	FLS; LOC103400025; LOC103406836; LOC103406950; LOC103413696; LOC103418902; LOC103421113; LOC103421794; LOC103430446; LOC103436139; LOC103437875; LOC103441195; LOC103443008; LOC103443512; LOC103443513; LOC103448109; LOC103448975; LOC103450464; LOC103454421; LOC103455413; LOC114821553; LOC114824906; LOC114825244; LOC114826643; LOC114826644; LOC114826998
GO:0009765	photosynthesis, light harvesting	biological_process	5	3500	8	25472	0.000146241	0.00257457	4.54857	LOC103403170; LOC103415279; LOC103421929; LOC103437829; LOC103442984
GO:0018298	protein-chromophore linkage	biological_process	22	3500	76	25472	0.00014947	0.00261832	2.10671	LOC103400222; LOC103403170; LOC103405098; LOC103412999; LOC103415279; LOC103417570; LOC103419710; LOC103420118; LOC103421929; LOC103424902; LOC103428062; LOC103429202; LOC103429652; LOC103433590; LOC103434978; LOC103436965; LOC103437223; LOC103437829; LOC103442984; LOC103450616; LOC103452146; LOC103453723
GO:0010325	raffinose family oligosaccharide biosynthetic process	biological_process	7	3500	14	25472	0.000174361	0.00303924	3.63886	LOC103404306; LOC103416906; LOC103423570; LOC103425172; LOC103446833; LOC103451980; LOC103454409
GO:0019253	reductive pentose-phosphate cycle	biological_process	12	3500	33	25472	0.000235501	0.00408473	2.64644	LOC103409404; LOC103416457; LOC103423136; LOC103425757; LOC103432255; LOC103433550; LOC103435411; LOC103436834; LOC103442070; LOC103444126; LOC103450517; LOC114823680
GO:0006260	DNA replication	biological_process	25	3500	93	25472	0.000240351	0.00413294	1.95637	LOC103405483; LOC103406461; LOC103412575; LOC103413077; LOC103413741; LOC103417767; LOC103423193; LOC103425492; LOC103426927; LOC103432923; LOC103435744; LOC103436119; LOC103436413; LOC103438345; LOC103440723; LOC103440724; LOC103441127; LOC103451820; LOC103456394; LOC108169539; LOC108174052; LOC108174913; LOC114819943; LOC114822098; LOC114825962
GO:0005886	plasma membrane	cellular_component	532	3500	3394	25472	0.000240629	0.00413294	1.14076	LOC103400517; LOC103400741; LOC103400855; LOC103401023; LOC103401038; LOC103401120; LOC103401259; LOC103401294; LOC103401497; LOC103401888; LOC103402020; LOC103402025; LOC103402133; LOC103402202; LOC103402437; LOC103402458; LOC103402561; LOC103402598; LOC103402654; LOC103402655; LOC103402693; LOC103402803; LOC103402819; LOC103403106; LOC103403306; LOC103403308; LOC103403544; LOC103403720; LOC1034…
GO:0004033	aldo-keto reductase (NADP) activity	molecular_function	4	3500	6	25472	0.000259634	0.00439505	4.85181	LOC103413791; LOC103433458; LOC103450272; LOC103450273
GO:0070401	NADP+ binding	molecular_function	4	3500	6	25472	0.000259634	0.00439505	4.85181	LOC103413791; LOC103433458; LOC103450272; LOC103450273
GO:0010086	embryonic root morphogenesis	biological_process	4	3500	6	25472	0.000259634	0.00439505	4.85181	LOC103422017; LOC103422885; LOC103424256; LOC103451518
GO:0016705	oxidoreductase activity, acting on paired donors, with incorporation or reduction of molecular oxygen	molecular_function	42	3500	184	25472	0.000279917	0.00471572	1.66122	LOC103401541; LOC103404651; LOC103405784; LOC103405824; LOC103406468; LOC103406836; LOC103406950; LOC103409417; LOC103418398; LOC103418775; LOC103419418; LOC103420289; LOC103420971; LOC103422635; LOC103422713; LOC103422998; LOC103425781; LOC103428002; LOC103428276; LOC103428639; LOC103432823; LOC103437230; LOC103437875; LOC103437983; LOC103438216; LOC103439561; LOC103440454; LOC103440490; LOC1034…
GO:0050242	pyruvate, phosphate dikinase activity	molecular_function	3	3500	4	25472	0.000355941	0.00580216	5.45829	LOC103403813; LOC103403814; LOC103424027
GO:0019483	beta-alanine biosynthetic process	biological_process	3	3500	4	25472	0.000355941	0.00580216	5.45829	LOC103411989; LOC103438108; LOC114823959
GO:0070008	serine-type exopeptidase activity	molecular_function	3	3500	4	25472	0.000355941	0.00580216	5.45829	LOC103413820; LOC103440212; LOC114822953
GO:0045548	phenylalanine ammonia-lyase activity	molecular_function	3	3500	4	25472	0.000355941	0.00580216	5.45829	LOC103419282; LOC103430265; LOC103450046
GO:0016210	naringenin-chalcone synthase activity	molecular_function	3	3500	4	25472	0.000355941	0.00580216	5.45829	LOC103421794; LOC103443512; LOC103443513
GO:1904966	positive regulation of vitamin E biosynthetic process	biological_process	3	3500	4	25472	0.000355941	0.00580216	5.45829	LOC103424902; LOC103436965; LOC103442791
GO:0043394	proteoglycan binding	molecular_function	3	3500	4	25472	0.000355941	0.00580216	5.45829	LOC103434452; LOC103434454; LOC103435265
GO:0009579	thylakoid	cellular_component	46	3500	209	25472	0.00038381	0.00614454	1.60179	LOC103401220; LOC103403404; LOC103405098; LOC103405453; LOC103406391; LOC103407948; LOC103408692; LOC103409987; LOC103413424; LOC103414096; LOC103414957; LOC103417553; LOC103418927; LOC103419116; LOC103420073; LOC103420118; LOC103420753; LOC103421499; LOC103422687; LOC103424576; LOC103426140; LOC103429090; LOC103429202; LOC103433590; LOC103435411; LOC103437223; LOC103437937; LOC103442529; LOC1034…
GO:0055085	transmembrane transport	biological_process	28	3500	111	25472	0.000385437	0.00614454	1.83582	LOC103409595; LOC103412553; LOC103416673; LOC103420348; LOC103423213; LOC103427035; LOC103427542; LOC103427796; LOC103427839; LOC103430654; LOC103431057; LOC103432582; LOC103436604; LOC103436681; LOC103438940; LOC103439784; LOC103443387; LOC103443873; LOC103444820; LOC103446294; LOC103447913; LOC103448442; LOC103449273; LOC103451591; LOC103452081; LOC103455707; LOC114820095; LOC114820108
GO:0000793	condensed chromosome	cellular_component	6	3500	12	25472	0.00038562	0.00614454	3.63886	LOC103406008; LOC103416552; LOC103418804; LOC103444368; LOC103450230; LOC114822124
GO:0008106	alcohol dehydrogenase (NADP+) activity	molecular_function	6	3500	12	25472	0.00038562	0.00614454	3.63886	LOC103413788; LOC103413791; LOC103433453; LOC103433458; LOC103450272; LOC103450273
GO:0007143	female meiotic nuclear division	biological_process	5	3500	9	25472	0.000387415	0.00614454	4.04317	LOC103402760; LOC103422197; LOC103433335; LOC103435979; LOC103451506
GO:0016810	hydrolase activity, acting on carbon-nitrogen (but not peptide) bonds	molecular_function	5	3500	9	25472	0.000387415	0.00614454	4.04317	LOC103408917; LOC103412168; LOC103414115; LOC103451331; LOC114823393
GO:0004364	glutathione transferase activity	molecular_function	20	3500	71	25472	0.000403132	0.00636514	2.05006	LOC103408400; LOC103409906; LOC103409925; LOC103414617; LOC103418426; LOC103419315; LOC103422275; LOC103423404; LOC103424010; LOC103427433; LOC103427921; LOC103432314; LOC103435649; LOC103436762; LOC103445382; LOC103451886; LOC103452346; LOC108171274; LOC114824380; LOC114827700
GO:0009543	chloroplast thylakoid lumen	cellular_component	20	3500	72	25472	0.000496333	0.00780174	2.02159	LOC103401220; LOC103404467; LOC103406391; LOC103407948; LOC103413454; LOC103414096; LOC103421499; LOC103423489; LOC103434748; LOC103434754; LOC103436352; LOC103437370; LOC103438390; LOC103442529; LOC103452442; LOC103454370; LOC103456144; LOC114819554; LOC114823011; LOC114827739
GO:0004784	superoxide dismutase activity	molecular_function	8	3500	20	25472	0.000690604	0.0108072	2.91109	LOC103413973; LOC103420753; LOC103428743; LOC103434128; LOC103448046; LOC103451457; LOC103452780; LOC114823685
GO:0080043	quercetin 3-O-glucosyltransferase activity	molecular_function	21	3500	79	25472	0.000741864	0.0115071	1.93458	LOC103404501; LOC103406365; LOC103406819; LOC103409460; LOC103410304; LOC103412791; LOC103418074; LOC103426549; LOC103429051; LOC103435654; LOC103437871; LOC103441459; LOC103443396; LOC103447313; LOC103447482; LOC103447605; LOC103451728; LOC108169239; LOC114824117; LOC114824505; LOC114827601
GO:0080044	quercetin 7-O-glucosyltransferase activity	molecular_function	21	3500	79	25472	0.000741864	0.0115071	1.93458	LOC103404501; LOC103406365; LOC103406819; LOC103409460; LOC103410304; LOC103412791; LOC103418074; LOC103426549; LOC103429051; LOC103435654; LOC103437871; LOC103441459; LOC103443396; LOC103447313; LOC103447482; LOC103447605; LOC103451728; LOC108169239; LOC114824117; LOC114824505; LOC114827601
GO:0005664	nuclear origin of replication recognition complex	cellular_component	4	3500	7	25472	0.000805173	0.0122199	4.15869	LOC103402637; LOC103441127; LOC103451820; LOC103456394
GO:0004838	L-tyrosine:2-oxoglutarate aminotransferase activity	molecular_function	4	3500	7	25472	0.000805173	0.0122199	4.15869	LOC103403054; LOC103405636; LOC103448720; LOC103452013
GO:2001022	positive regulation of response to DNA damage stimulus	biological_process	4	3500	7	25472	0.000805173	0.0122199	4.15869	LOC103413593; LOC103415766; LOC103425160; LOC114822124
GO:0016229	steroid dehydrogenase activity	molecular_function	4	3500	7	25472	0.000805173	0.0122199	4.15869	LOC103413791; LOC103433458; LOC103450272; LOC103450273
GO:0004353	glutamate dehydrogenase [NAD(P)+] activity	molecular_function	4	3500	7	25472	0.000805173	0.0122199	4.15869	LOC103438445; LOC103452065; LOC103453876; LOC114824344
GO:0008194	UDP-glycosyltransferase activity	molecular_function	24	3500	95	25472	0.000839874	0.0126918	1.83858	LOC103400658; LOC103404501; LOC103406365; LOC103406819; LOC103409460; LOC103410304; LOC103412684; LOC103412791; LOC103418074; LOC103426549; LOC103429051; LOC103435654; LOC103437871; LOC103441459; LOC103443396; LOC103447313; LOC103447482; LOC103447605; LOC103451728; LOC108169224; LOC108169239; LOC114824117; LOC114824505; LOC114827601
GO:0009414	response to water deprivation	biological_process	76	3500	396	25472	0.000934495	0.0140614	1.39673	HD1; LOC103400659; LOC103403579; LOC103403976; LOC103404306; LOC103405870; LOC103406285; LOC103406883; LOC103406926; LOC103407637; LOC103410658; LOC103410709; LOC103411183; LOC103411570; LOC103412741; LOC103413400; LOC103413424; LOC103413791; LOC103414585; LOC103415011; LOC103415256; LOC103415314; LOC103415754; LOC103416597; LOC103416985; LOC103417569; LOC103418494; LOC103418570; LOC103421540; LO…
GO:0010005	cortical microtubule, transverse to long axis	cellular_component	7	3500	17	25472	0.000960768	0.0143952	2.99671	LOC103404638; LOC103415297; LOC103437900; LOC103451539; LOC108174105; LOC114820570; LOC114825668
GO:0008559	xenobiotic transmembrane transporting ATPase activity	molecular_function	9	3500	25	25472	0.00107355	0.0160169	2.61998	LOC103416673; LOC103427839; LOC103431057; LOC103432582; LOC103438940; LOC103443387; LOC103448442; LOC103449273; LOC103452081
GO:0031969	chloroplast membrane	cellular_component	45	3500	214	25472	0.00121221	0.0180092	1.53036	LOC103400029; LOC103400054; LOC103406562; LOC103408145; LOC103408692; LOC103411791; LOC103411985; LOC103417553; LOC103418467; LOC103419381; LOC103420607; LOC103422718; LOC103424158; LOC103428462; LOC103428538; LOC103429090; LOC103431676; LOC103431678; LOC103432719; LOC103433598; LOC103433696; LOC103434694; LOC103434835; LOC103437685; LOC103440202; LOC103441922; LOC103441970; LOC103443970; LOC1034…
GO:0052692	raffinose alpha-galactosidase activity	molecular_function	6	3500	14	25472	0.00129834	0.0192078	3.11902	LOC103434744; LOC103435060; LOC103444612; LOC103446833; LOC103447719; LOC103454409
GO:0019904	protein domain specific binding	molecular_function	19	3500	72	25472	0.00130923	0.0192878	1.92051	LOC103401608; LOC103402830; LOC103405098; LOC103406512; LOC103408692; LOC103420118; LOC103422932; LOC103429202; LOC103432238; LOC103433590; LOC103439749; LOC103444768; LOC103447435; LOC103449800; LOC103450616; LOC103451149; LOC114819959; LOC114823931; LOC114826075
GO:0030246	carbohydrate binding	molecular_function	33	3500	147	25472	0.00138697	0.020348	1.63377	LOC103401648; LOC103402025; LOC103403299; LOC103404424; LOC103405853; LOC103405911; LOC103411632; LOC103412329; LOC103413972; LOC103414013; LOC103414252; LOC103416274; LOC103417202; LOC103418267; LOC103418287; LOC103430729; LOC103433900; LOC103434452; LOC103434454; LOC103435265; LOC103437614; LOC103441147; LOC103445112; LOC103446465; LOC103447544; LOC103447870; LOC103450068; LOC103450435; LOC1034…
GO:0042651	thylakoid membrane	cellular_component	10	3500	30	25472	0.00142395	0.0208039	2.4259	LOC103412056; LOC103412119; LOC103420118; LOC103424902; LOC103433598; LOC103436965; LOC103441572; LOC103450849; LOC103451676; LOC114821976
GO:0003688	DNA replication origin binding	molecular_function	7	3500	18	25472	0.0015221	0.0218753	2.83022	LOC103402637; LOC103415561; LOC103427154; LOC103441127; LOC103451788; LOC103451820; LOC103456394
GO:0051276	chromosome organization	biological_process	7	3500	18	25472	0.0015221	0.0218753	2.83022	LOC103413741; LOC103426927; LOC103433704; LOC103435744; LOC103439980; LOC114822124; LOC114825962
GO:1905582	response to mannose	biological_process	3	3500	5	25472	0.00158426	0.0218753	4.36663	LOC103400918; LOC103406845; LOC103411622
GO:0042218	1-aminocyclopropane-1-carboxylate biosynthetic process	biological_process	3	3500	5	25472	0.00158426	0.0218753	4.36663	LOC103406500; LOC103414844; LOC103420771
GO:0009650	UV protection	biological_process	3	3500	5	25472	0.00158426	0.0218753	4.36663	LOC103411713; LOC103433070; LOC114819544
GO:0006212	uracil catabolic process	biological_process	3	3500	5	25472	0.00158426	0.0218753	4.36663	LOC103411989; LOC103438108; LOC114823959
GO:0015858	nucleoside transport	biological_process	3	3500	5	25472	0.00158426	0.0218753	4.36663	LOC103412448; LOC103413722; LOC103434665
GO:0016984	ribulose-bisphosphate carboxylase activity	molecular_function	3	3500	5	25472	0.00158426	0.0218753	4.36663	LOC103416457; LOC103432255; LOC103444126
GO:0010236	plastoquinone biosynthetic process	biological_process	3	3500	5	25472	0.00158426	0.0218753	4.36663	LOC103427372; LOC103444873; LOC103448906
GO:0050347	trans-octaprenyltranstransferase activity	molecular_function	3	3500	5	25472	0.00158426	0.0218753	4.36663	LOC103427372; LOC103435174; LOC103448906
GO:0052924	all-trans-nonaprenyl-diphosphate synthase (geranylgeranyl-diphosphate specific) activity	molecular_function	3	3500	5	25472	0.00158426	0.0218753	4.36663	LOC103427372; LOC103435174; LOC103448906
GO:0033699	DNA 5'-adenosine monophosphate hydrolase activity	molecular_function	3	3500	5	25472	0.00158426	0.0218753	4.36663	LOC103436413; LOC108174913; LOC114819943
GO:1990165	single-strand break-containing DNA binding	molecular_function	3	3500	5	25472	0.00158426	0.0218753	4.36663	LOC103436413; LOC108174913; LOC114819943
GO:0047066	phospholipid-hydroperoxide glutathione peroxidase activity	molecular_function	3	3500	5	25472	0.00158426	0.0218753	4.36663	LOC103446626; LOC103446628; LOC103454744
GO:0006527	arginine catabolic process	biological_process	5	3500	11	25472	0.00166346	0.0228791	3.30805	LOC103413684; LOC103422167; LOC103426874; LOC103449463; LOC114824772
GO:0007231	osmosensory signaling pathway	biological_process	4	3500	8	25472	0.00190339	0.0249387	3.63886	LOC103402159; LOC103422017; LOC103433139; LOC103451518
GO:0005868	cytoplasmic dynein complex	cellular_component	4	3500	8	25472	0.00190339	0.0249387	3.63886	LOC103405459; LOC103427833; LOC103430622; LOC103448669
GO:2000582	positive regulation of ATP-dependent microtubule motor activity, plus-end-directed	biological_process	4	3500	8	25472	0.00190339	0.0249387	3.63886	LOC103405459; LOC103427833; LOC103430622; LOC103448669
GO:0046527	glucosyltransferase activity	molecular_function	4	3500	8	25472	0.00190339	0.0249387	3.63886	LOC103406365; LOC103427573; LOC103430439; LOC114824505
GO:0000012	single strand break repair	biological_process	4	3500	8	25472	0.00190339	0.0249387	3.63886	LOC103413077; LOC103436413; LOC108174913; LOC114819943
GO:0030915	Smc5-Smc6 complex	cellular_component	4	3500	8	25472	0.00190339	0.0249387	3.63886	LOC103413593; LOC103415766; LOC103425160; LOC103448726
GO:0009378	four-way junction helicase activity	molecular_function	4	3500	8	25472	0.00190339	0.0249387	3.63886	LOC103413741; LOC103417767; LOC103426927; LOC114825962
GO:0010469	regulation of signaling receptor activity	biological_process	4	3500	8	25472	0.00190339	0.0249387	3.63886	LOC103416593; LOC103422484; LOC103423988; LOC103455119
GO:0048018	receptor ligand activity	molecular_function	4	3500	8	25472	0.00190339	0.0249387	3.63886	LOC103416593; LOC103422484; LOC103423988; LOC103455119
GO:0009800	cinnamic acid biosynthetic process	biological_process	4	3500	8	25472	0.00190339	0.0249387	3.63886	LOC103419282; LOC103430265; LOC103450046; MYB111
GO:0033314	mitotic DNA replication checkpoint	biological_process	4	3500	8	25472	0.00190339	0.0249387	3.63886	LOC103420206; LOC103427154; LOC103433915; LOC103456394
GO:0033500	carbohydrate homeostasis	biological_process	4	3500	8	25472	0.00190339	0.0249387	3.63886	LOC103422017; LOC103424190; LOC103433139; LOC103451518
GO:0050662	coenzyme binding	molecular_function	16	3500	59	25472	0.00190529	0.0249387	1.97362	LOC103412093; LOC103412848; LOC103412921; LOC103413696; LOC103418902; LOC103420490; LOC103424888; LOC103427062; LOC103429871; LOC103436695; LOC103438439; LOC103445311; LOC103450464; LOC114823694; LOC114826643; LOC114826644
GO:0006032	chitin catabolic process	biological_process	11	3500	36	25472	0.00225809	0.028259	2.22375	LOC103400659; LOC103409997; LOC103410311; LOC103417569; LOC103422527; LOC103426493; LOC103443344; LOC103443354; LOC103453829; LOC103455189; LOC114824321
GO:0004003	ATP-dependent DNA helicase activity	molecular_function	8	3500	23	25472	0.00228138	0.028259	2.53138	LOC103401167; LOC103401564; LOC103402596; LOC103405483; LOC103438958; LOC103443822; LOC103451580; LOC114822098
GO:0004022	alcohol dehydrogenase (NAD) activity	molecular_function	8	3500	23	25472	0.00228138	0.028259	2.53138	LOC103409397; LOC103409572; LOC103418393; LOC103428551; LOC103435773; LOC103445458; LOC114819103; LOC114819149
GO:0010207	photosystem II assembly	biological_process	7	3500	19	25472	0.00231464	0.028259	2.68126	LOC103401257; LOC103406391; LOC103411255; LOC103420118; LOC103442529; LOC114820150; LOC114823706
GO:0009654	photosystem II oxygen evolving complex	cellular_component	10	3500	32	25472	0.00258819	0.028259	2.27429	LOC103401220; LOC103401257; LOC103405142; LOC103407948; LOC103414096; LOC103438390; LOC103445471; LOC103445766; LOC103456144; LOC114827802
GO:0034256	chlorophyll(ide) b reductase activity	molecular_function	2	3500	3	25472	0.00259235	0.028259	4.85181	LOC103400502; LOC103448940
GO:0004795	threonine synthase activity	molecular_function	2	3500	3	25472	0.00259235	0.028259	4.85181	LOC103401762; LOC103450777
GO:0004573	mannosyl-oligosaccharide glucosidase activity	molecular_function	2	3500	3	25472	0.00259235	0.028259	4.85181	LOC103403150; LOC103431926
GO:0010245	radial microtubular system formation	biological_process	2	3500	3	25472	0.00259235	0.028259	4.85181	LOC103403793; LOC103426753
GO:1900366	negative regulation of defense response to insect	biological_process	2	3500	3	25472	0.00259235	0.028259	4.85181	LOC103403905; LOC103422586
GO:1990136	linoleate 9S-lipoxygenase activity	molecular_function	2	3500	3	25472	0.00259235	0.028259	4.85181	LOC103403905; LOC103422586
GO:0000743	nuclear migration involved in conjugation with cellular fusion	biological_process	2	3500	3	25472	0.00259235	0.028259	4.85181	LOC103405459; LOC103427833
GO:0030989	dynein-driven meiotic oscillatory nuclear movement	biological_process	2	3500	3	25472	0.00259235	0.028259	4.85181	LOC103405459; LOC103427833
GO:0035974	meiotic spindle pole body	cellular_component	2	3500	3	25472	0.00259235	0.028259	4.85181	LOC103405459; LOC103427833
GO:0008242	omega peptidase activity	molecular_function	2	3500	3	25472	0.00259235	0.028259	4.85181	LOC103408080; LOC103448789
GO:0034722	gamma-glutamyl-peptidase activity	molecular_function	2	3500	3	25472	0.00259235	0.028259	4.85181	LOC103408080; LOC103448789
GO:0046900	tetrahydrofolylpolyglutamate metabolic process	biological_process	2	3500	3	25472	0.00259235	0.028259	4.85181	LOC103408080; LOC103448789
GO:0010426	DNA methylation on cytosine within a CHH sequence	biological_process	2	3500	3	25472	0.00259235	0.028259	4.85181	LOC103409483; LOC114825051
GO:0071493	cellular response to UV-B	biological_process	2	3500	3	25472	0.00259235	0.028259	4.85181	LOC103411713; LOC114819544
GO:0002058	uracil binding	molecular_function	2	3500	3	25472	0.00259235	0.028259	4.85181	LOC103411989; LOC103438108
GO:0004159	dihydrouracil dehydrogenase (NAD+) activity	molecular_function	2	3500	3	25472	0.00259235	0.028259	4.85181	LOC103411989; LOC103438108
GO:0017113	dihydropyrimidine dehydrogenase (NADP+) activity	molecular_function	2	3500	3	25472	0.00259235	0.028259	4.85181	LOC103411989; LOC103438108
GO:0070001	aspartic-type peptidase activity	molecular_function	2	3500	3	25472	0.00259235	0.028259	4.85181	LOC103415314; LOC114820948
GO:0070009	serine-type aminopeptidase activity	molecular_function	2	3500	3	25472	0.00259235	0.028259	4.85181	LOC103416876; LOC103442764
GO:0010686	tetracyclic triterpenoid biosynthetic process	biological_process	2	3500	3	25472	0.00259235	0.028259	4.85181	LOC103416907; LOC103453651
GO:0030275	LRR domain binding	molecular_function	2	3500	3	25472	0.00259235	0.028259	4.85181	LOC103417025; LOC114819573
GO:0042547	cell wall modification involved in multidimensional cell growth	biological_process	2	3500	3	25472	0.00259235	0.028259	4.85181	LOC103420180; LOC114821953
GO:0008792	arginine decarboxylase activity	molecular_function	2	3500	3	25472	0.00259235	0.028259	4.85181	LOC103422167; LOC114824772
GO:0009446	putrescine biosynthetic process	biological_process	2	3500	3	25472	0.00259235	0.028259	4.85181	LOC103422167; LOC114824772
GO:0008622	epsilon DNA polymerase complex	cellular_component	2	3500	3	25472	0.00259235	0.028259	4.85181	LOC103422885; LOC103424256
GO:0032958	inositol phosphate biosynthetic process	biological_process	2	3500	3	25472	0.00259235	0.028259	4.85181	LOC103423459; LOC103442791
GO:1904964	positive regulation of phytol biosynthetic process	biological_process	2	3500	3	25472	0.00259235	0.028259	4.85181	LOC103424902; LOC103436965
GO:0004368	glycerol-3-phosphate dehydrogenase (quinone) activity	molecular_function	2	3500	3	25472	0.00259235	0.028259	4.85181	LOC103426366; LOC103428073
GO:0006127	glycerophosphate shuttle	biological_process	2	3500	3	25472	0.00259235	0.028259	4.85181	LOC103426366; LOC103428073
GO:0052591	sn-glycerol-3-phosphate:ubiquinone-8 oxidoreductase activity	molecular_function	2	3500	3	25472	0.00259235	0.028259	4.85181	LOC103426366; LOC103428073
GO:0031573	intra-S DNA damage checkpoint	biological_process	2	3500	3	25472	0.00259235	0.028259	4.85181	LOC103428449; LOC103433915
GO:0005221	intracellular cyclic nucleotide activated cation channel activity	molecular_function	2	3500	3	25472	0.00259235	0.028259	4.85181	LOC103429045; LOC103439584
GO:0005222	intracellular cAMP-activated cation channel activity	molecular_function	2	3500	3	25472	0.00259235	0.028259	4.85181	LOC103429045; LOC103439584
GO:0070509	calcium ion import	biological_process	2	3500	3	25472	0.00259235	0.028259	4.85181	LOC103429045; LOC103439584
GO:0040001	establishment of mitotic spindle localization	biological_process	2	3500	3	25472	0.00259235	0.028259	4.85181	LOC103430622; LOC103448669
GO:0005746	mitochondrial respiratory chain	cellular_component	2	3500	3	25472	0.00259235	0.028259	4.85181	LOC103432623; LOC103449209
GO:0006069	ethanol oxidation	biological_process	2	3500	3	25472	0.00259235	0.028259	4.85181	LOC103435773; LOC103445458
GO:0051903	S-(hydroxymethyl)glutathione dehydrogenase activity	molecular_function	2	3500	3	25472	0.00259235	0.028259	4.85181	LOC103435773; LOC103445458
GO:0008974	phosphoribulokinase activity	molecular_function	2	3500	3	25472	0.00259235	0.028259	4.85181	LOC103436834; LOC114823680
GO:0051731	polynucleotide 5'-hydroxyl-kinase activity	molecular_function	2	3500	3	25472	0.00259235	0.028259	4.85181	LOC103437775; LOC114825405
GO:0003948	N4-(beta-N-acetylglucosaminyl)-L-asparaginase activity	molecular_function	2	3500	3	25472	0.00259235	0.028259	4.85181	LOC103439600; LOC114826649
GO:0004170	dUTP diphosphatase activity	molecular_function	2	3500	3	25472	0.00259235	0.028259	4.85181	LOC103440429; LOC103440505
GO:0046081	dUTP catabolic process	biological_process	2	3500	3	25472	0.00259235	0.028259	4.85181	LOC103440429; LOC103440505
GO:0102216	maltodextrin water dikinase	molecular_function	2	3500	3	25472	0.00259235	0.028259	4.85181	LOC103441686; LOC103452010
GO:0102218	starch, H2O dikinase activity	molecular_function	2	3500	3	25472	0.00259235	0.028259	4.85181	LOC103441686; LOC103452010
GO:0034484	raffinose catabolic process	biological_process	2	3500	3	25472	0.00259235	0.028259	4.85181	LOC103446833; LOC103454409
GO:0006883	cellular sodium ion homeostasis	biological_process	2	3500	3	25472	0.00259235	0.028259	4.85181	LOC103448634; LOC103451145
GO:0060416	response to growth hormone	biological_process	2	3500	3	25472	0.00259235	0.028259	4.85181	LOC103451886; LOC103452346
GO:0010365	positive regulation of ethylene biosynthetic process	biological_process	2	3500	3	25472	0.00259235	0.028259	4.85181	LOC114820115; NAC23
GO:0010027	thylakoid membrane organization	biological_process	13	3500	46	25472	0.0026626	0.0289352	2.05675	LOC103404160; LOC103426922; LOC103430349; LOC103442354; LOC103444030; LOC103445979; LOC103446212; LOC103447289; LOC103449125; LOC103452442; LOC103456109; LOC114819554; LOC114820150
GO:0009058	biosynthetic process	biological_process	9	3500	28	25472	0.00291792	0.0315742	2.33927	LOC103405636; LOC103405859; LOC103416410; LOC103418091; LOC103419802; LOC103427403; LOC103454580; LOC114819426; LOC114821120
GO:0043864	indoleacetamide hydrolase activity	molecular_function	5	3500	12	25472	0.00294131	0.0315742	3.03238	LOC103408917; LOC103412168; LOC103414115; LOC103451331; LOC114823393
GO:0050664	oxidoreductase activity, acting on NAD(P)H, oxygen as acceptor	molecular_function	5	3500	12	25472	0.00294131	0.0315742	3.03238	LOC103412309; LOC103430595; LOC103438671; LOC103440390; LOC103440471
GO:0006517	protein deglycosylation	biological_process	5	3500	12	25472	0.00294131	0.0315742	3.03238	LOC103427489; LOC103430729; LOC103437613; LOC103439600; LOC114826649
GO:0009099	valine biosynthetic process	biological_process	6	3500	16	25472	0.00336706	0.035817	2.72914	LOC103405563; LOC103412455; LOC103431826; LOC103436029; LOC103445182; LOC114822481
GO:0048564	photosystem I assembly	biological_process	6	3500	16	25472	0.00336706	0.035817	2.72914	LOC103413083; LOC103414096; LOC103452442; LOC108172114; LOC114819554; LOC114820150
GO:0009508	plastid chromosome	cellular_component	6	3500	16	25472	0.00336706	0.035817	2.72914	LOC103444030; LOC103445979; LOC103446141; LOC103451857; LOC114823931; LOC114826075
GO:0042626	ATPase activity, coupled to transmembrane movement of substances	molecular_function	29	3500	132	25472	0.00338321	0.0358804	1.59889	LOC103404434; LOC103405234; LOC103416673; LOC103420348; LOC103423213; LOC103426922; LOC103427035; LOC103427796; LOC103427839; LOC103430654; LOC103431057; LOC103432582; LOC103436604; LOC103438057; LOC103438940; LOC103442343; LOC103443387; LOC103443873; LOC103444820; LOC103446262; LOC103446263; LOC103447913; LOC103448442; LOC103449273; LOC103451591; LOC103452081; LOC114820095; LOC114820108; LOC1148…
GO:0005544	calcium-dependent phospholipid binding	molecular_function	7	3500	20	25472	0.00339733	0.0359137	2.5472	LOC103411536; LOC103411570; LOC103418570; LOC103435157; LOC103440246; LOC103448626; LOC103450157
GO:1990578	perinuclear endoplasmic reticulum membrane	cellular_component	10	3500	33	25472	0.00340675	0.0359137	2.20537	LOC103407821; LOC103423842; LOC103432947; LOC103432948; LOC103432951; LOC103438083; LOC103450221; LOC103455179; LOC114824722; LOC114826128
GO:0009620	response to fungus	biological_process	25	3500	110	25472	0.00349501	0.0367342	1.65403	LOC103405870; LOC103406610; LOC103413400; LOC103413920; LOC103417370; LOC103417777; LOC103422185; LOC103426862; LOC103427480; LOC103430997; LOC103434744; LOC103435060; LOC103444963; LOC103447719; LOC103447762; LOC103449971; LOC103454171; LOC103454377; LOC103456151; LOC114821175; LOC114825244; LOC114825669; LOC114825896; LOC114826096; LOC114827520
GO:0003886	DNA (cytosine-5-)-methyltransferase activity	molecular_function	4	3500	9	25472	0.00379837	0.0392201	3.23454	LOC103404319; LOC103409483; LOC103412678; LOC103425030
GO:0042132	fructose 1,6-bisphosphate 1-phosphatase activity	molecular_function	4	3500	9	25472	0.00379837	0.0392201	3.23454	LOC103416291; LOC103433550; LOC103435411; LOC103450517
GO:0004478	methionine adenosyltransferase activity	molecular_function	4	3500	9	25472	0.00379837	0.0392201	3.23454	LOC103426242; LOC103450000; LOC103452632; LOC103452744
GO:0006556	S-adenosylmethionine biosynthetic process	biological_process	4	3500	9	25472	0.00379837	0.0392201	3.23454	LOC103426242; LOC103450000; LOC103452632; LOC103452744
GO:0007112	male meiosis cytokinesis	biological_process	4	3500	9	25472	0.00379837	0.0392201	3.23454	LOC103426753; LOC103440003; LOC114821175; LOC114825669
GO:1990429	peroxisomal importomer complex	cellular_component	4	3500	9	25472	0.00379837	0.0392201	3.23454	LOC103430622; LOC103448669; LOC103450605; LOC103451392
GO:0031418	L-ascorbic acid binding	molecular_function	13	3500	48	25472	0.00410467	0.0411774	1.97105	FLS; LOC103400025; LOC103400792; LOC103413822; LOC103434461; LOC103436139; LOC103437326; LOC103437327; LOC103440239; LOC103441195; LOC103446762; LOC114821553; LOC114824906
GO:0042549	photosystem II stabilization	biological_process	3	3500	6	25472	0.00423352	0.0411774	3.63886	LOC103401257; LOC103435687; LOC103445710
GO:0052635	C-20 gibberellin 2-beta-dioxygenase activity	molecular_function	3	3500	6	25472	0.00423352	0.0411774	3.63886	LOC103403426; LOC103419614; LOC103444617
GO:0043090	amino acid import	biological_process	3	3500	6	25472	0.00423352	0.0411774	3.63886	LOC103404225; LOC103411133; LOC103442157
GO:0030785	[ribulose-bisphosphate carboxylase]-lysine N-methyltransferase activity	molecular_function	3	3500	6	25472	0.00423352	0.0411774	3.63886	LOC103405062; LOC103406296; LOC103425473
GO:0061634	alpha-D-xyloside xylohydrolase	molecular_function	3	3500	6	25472	0.00423352	0.0411774	3.63886	LOC103405911; LOC103441147; LOC103451659
GO:0008113	peptide-methionine (S)-S-oxide reductase activity	molecular_function	3	3500	6	25472	0.00423352	0.0411774	3.63886	LOC103409698; LOC103426449; LOC103437644
GO:0019433	triglyceride catabolic process	biological_process	3	3500	6	25472	0.00423352	0.0411774	3.63886	LOC103415051; LOC103437610; LOC103442731
GO:0033388	putrescine biosynthetic process from arginine	biological_process	3	3500	6	25472	0.00423352	0.0411774	3.63886	LOC103420360; LOC103422167; LOC103453363
GO:0008395	steroid hydroxylase activity	molecular_function	3	3500	6	25472	0.00423352	0.0411774	3.63886	LOC103420971; LOC103440490; LOC103440492
GO:0051513	regulation of monopolar cell growth	biological_process	3	3500	6	25472	0.00423352	0.0411774	3.63886	LOC103421524; LOC103432237; LOC103448924
GO:0010165	response to X-ray	biological_process	3	3500	6	25472	0.00423352	0.0411774	3.63886	LOC103422197; LOC103435979; LOC103451506
GO:0052654	L-leucine transaminase activity	molecular_function	3	3500	6	25472	0.00423352	0.0411774	3.63886	LOC103431826; LOC103436029; LOC103445182
GO:0052655	L-valine transaminase activity	molecular_function	3	3500	6	25472	0.00423352	0.0411774	3.63886	LOC103431826; LOC103436029; LOC103445182
GO:0052656	L-isoleucine transaminase activity	molecular_function	3	3500	6	25472	0.00423352	0.0411774	3.63886	LOC103431826; LOC103436029; LOC103445182
GO:0004084	branched-chain-amino-acid transaminase activity	molecular_function	3	3500	6	25472	0.00423352	0.0411774	3.63886	LOC103434103; LOC103445182; LOC114824835
GO:0004566	beta-glucuronidase activity	molecular_function	3	3500	6	25472	0.00423352	0.0411774	3.63886	LOC103437866; LOC103447604; LOC103456224
GO:0016618	hydroxypyruvate reductase activity	molecular_function	3	3500	6	25472	0.00423352	0.0411774	3.63886	LOC103439098; LOC103439114; LOC103443798
GO:0050982	detection of mechanical stimulus	biological_process	3	3500	6	25472	0.00423352	0.0411774	3.63886	LOC103440894; LOC103450923; LOC103455790
GO:0097468	programmed cell death in response to reactive oxygen species	biological_process	3	3500	6	25472	0.00423352	0.0411774	3.63886	LOC103440894; LOC103450923; LOC103455790
GO:0000808	origin recognition complex	cellular_component	3	3500	6	25472	0.00423352	0.0411774	3.63886	LOC103441127; LOC103451820; LOC103456394
GO:0008970	phospholipase A1 activity	molecular_function	8	3500	25	25472	0.00441155	0.0427562	2.32887	LOC103408145; LOC103411713; LOC103435185; LOC103445711; LOC103449224; LOC103451162; LOC114819123; LOC114819544
GO:0004806	triglyceride lipase activity	molecular_function	10	3500	34	25472	0.00442012	0.0427562	2.1405	LOC103408102; LOC103415051; LOC103421585; LOC103421684; LOC103429308; LOC103435185; LOC103437610; LOC103442731; LOC103445711; LOC114819123
GO:0005506	iron ion binding	molecular_function	72	3500	395	25472	0.00477184	0.046032	1.32657	CYP707A; LOC103400740; LOC103401541; LOC103401753; LOC103403438; LOC103404651; LOC103405784; LOC103405824; LOC103406468; LOC103406562; LOC103406836; LOC103406883; LOC103406950; LOC103409417; LOC103409912; LOC103410051; LOC103410357; LOC103413822; LOC103413895; LOC103418398; LOC103418775; LOC103419418; LOC103420289; LOC103420971; LOC103422316; LOC103422635; LOC103422713; LOC103422998; LOC103423556…
GO:0010951	negative regulation of endopeptidase activity	biological_process	5	3500	13	25472	0.00483127	0.0464779	2.79912	LOC103420967; LOC103422296; LOC103440470; LOC103440473; LOC114824033
GO:0015293	symporter activity	molecular_function	19	3500	80	25472	0.00501054	0.0480711	1.72846	LOC103401023; LOC103402588; LOC103404225; LOC103409428; LOC103409678; LOC103411133; LOC103418927; LOC103419864; LOC103422077; LOC103422687; LOC103428150; LOC103430931; LOC103434544; LOC103436871; LOC103442157; LOC103447221; LOC103450661; LOC103451572; LOC103452097
GO:0005694	chromosome	cellular_component	14	3500	54	25472	0.00502773	0.048105	1.88681	LOC103402019; LOC103405722; LOC103413741; LOC103417767; LOC103426927; LOC103427672; LOC103428212; LOC103433129; LOC103433704; LOC103439618; LOC103440723; LOC103440724; LOC103450030; LOC114825962
GO:0009941	chloroplast envelope	cellular_component	96	3500	549	25472	0.00518178	0.0494446	1.27261	LOC103401375; LOC103401562; LOC103402171; LOC103403404; LOC103405038; LOC103405649; LOC103405974; LOC103406461; LOC103408692; LOC103409766; LOC103409996; LOC103410246; LOC103411496; LOC103411985; LOC103412093; LOC103413146; LOC103413424; LOC103415235; LOC103417553; LOC103417828; LOC103417985; LOC103418467; LOC103419116; LOC103419710; LOC103421939; LOC103422718; LOC103423136; LOC103423556; LOC1034…
GO:0048046	apoplast	cellular_component	84	3500	473	25472	0.00540892	0.0514724	1.29245	BGAL101; LOC103400659; LOC103400911; LOC103401308; LOC103403007; LOC103403011; LOC103405827; LOC103405911; LOC103405974; LOC103407787; LOC103409241; LOC103409272; LOC103411200; LOC103412656; LOC103416673; LOC103417569; LOC103419398; LOC103419852; LOC103420450; LOC103420967; LOC103422296; LOC103422599; LOC103422885; LOC103424256; LOC103424622; LOC103425757; LOC103427535; LOC103427839; LOC103429178…
GO:0015238	drug transmembrane transporter activity	molecular_function	17	3500	70	25472	0.0055069	0.0522636	1.76744	LOC103402630; LOC103403071; LOC103405169; LOC103410500; LOC103415446; LOC103416028; LOC103416598; LOC103428479; LOC103433696; LOC103441751; LOC103442922; LOC103443008; LOC103446715; LOC103448048; LOC114819949; LOC114821660; LOC114824779
GO:0030247	polysaccharide binding	molecular_function	8	3500	26	25472	0.0059363	0.0561112	2.2393	LOC103400659; LOC103402825; LOC103412188; LOC103417569; LOC103420696; LOC103431198; LOC103453829; LOC114819137
GO:0009695	jasmonic acid biosynthetic process	biological_process	11	3500	40	25472	0.00596012	0.0561112	2.00137	LOC103408282; LOC103415175; LOC103416677; LOC103418149; LOC103428639; LOC103429319; LOC103440454; LOC103445421; LOC103450322; LOC103454377; LOC103455025
GO:0009295	nucleoid	cellular_component	11	3500	40	25472	0.00596012	0.0561112	2.00137	LOC103420753; LOC103444030; LOC103445715; LOC103445979; LOC103446141; LOC103451457; LOC103451857; LOC103452780; LOC114821120; LOC114823931; LOC114826075
GO:0006662	glycerol ether metabolic process	biological_process	13	3500	50	25472	0.00612322	0.057493	1.89221	LOC103405149; LOC103405785; LOC103410994; LOC103426798; LOC103439224; LOC103440233; LOC103440293; LOC103440732; LOC103441832; LOC103444549; LOC103450436; LOC103450437; LOC114827804
GO:0009638	phototropism	biological_process	7	3500	22	25472	0.00669442	0.0626268	2.31564	BZIP12; LOC103412999; LOC103425836; LOC103428062; LOC103429865; LOC103433964; LOC103452330
GO:0006696	ergosterol biosynthetic process	biological_process	4	3500	10	25472	0.00674114	0.0626268	2.91109	LOC103405286; LOC103414696; LOC103415087; LOC114827290
GO:0006559	L-phenylalanine catabolic process	biological_process	4	3500	10	25472	0.00674114	0.0626268	2.91109	LOC103405636; LOC103419282; LOC103430265; LOC103450046
GO:0010190	cytochrome b6f complex assembly	biological_process	4	3500	10	25472	0.00674114	0.0626268	2.91109	LOC103405785; LOC103411103; LOC103440732; LOC103451903
GO:0006302	double-strand break repair	biological_process	10	3500	36	25472	0.00715515	0.0661241	2.02159	LOC103400744; LOC103404218; LOC103413077; LOC103419142; LOC103425492; LOC103433704; LOC103436413; LOC103448688; LOC108174913; LOC114819943
GO:0010268	brassinosteroid homeostasis	biological_process	10	3500	36	25472	0.00715515	0.0661241	2.02159	LOC103401541; LOC103420971; LOC103422316; LOC103432823; LOC103437230; LOC103440490; LOC103440492; LOC103443518; LOC103445207; LOC103453334
GO:0045486	naringenin 3-dioxygenase activity	molecular_function	6	3500	18	25472	0.00729743	0.0669121	2.4259	FLS; LOC103400025; LOC103436139; LOC103441195; LOC114821553; LOC114824906
GO:0030983	mismatched DNA binding	molecular_function	6	3500	18	25472	0.00729743	0.0669121	2.4259	LOC103410335; LOC103422994; LOC103433046; LOC103436413; LOC108174913; LOC114819943
GO:0006388	tRNA splicing, via endonucleolytic cleavage and ligation	biological_process	6	3500	18	25472	0.00729743	0.0669121	2.4259	LOC103420237; LOC103421492; LOC103422685; LOC103454766; LOC114821801; LOC114824429
GO:0010167	response to nitrate	biological_process	11	3500	41	25472	0.00739284	0.0671952	1.95256	LOC103400659; LOC103409678; LOC103417019; LOC103417569; LOC103430210; LOC103433702; LOC103435647; LOC103436871; LOC103437664; LOC103441537; LOC103453829
GO:0009958	positive gravitropism	biological_process	11	3500	41	25472	0.00739284	0.0671952	1.95256	LOC103402598; LOC103403054; LOC103403957; LOC103404434; LOC103405234; LOC103409912; LOC103416050; LOC103442343; LOC103449486; LOC103452013; LOC103452330
GO:0004185	serine-type carboxypeptidase activity	molecular_function	12	3500	46	25472	0.00745784	0.0671952	1.89853	LOC103401929; LOC103402594; LOC103407786; LOC103423727; LOC103428808; LOC103432412; LOC103433178; LOC103438456; LOC103441946; LOC103448027; LOC103452480; LOC108170803
GO:0016310	phosphorylation	biological_process	5	3500	14	25472	0.00748098	0.0671952	2.59918	LOC103404160; LOC103410975; LOC103413612; LOC114821175; LOC114825669
GO:0047714	galactolipase activity	molecular_function	5	3500	14	25472	0.00748098	0.0671952	2.59918	LOC103408145; LOC103435185; LOC103445711; LOC103449224; LOC114819123
GO:0004124	cysteine synthase activity	molecular_function	5	3500	14	25472	0.00748098	0.0671952	2.59918	LOC103408707; LOC103413454; LOC103434138; LOC103434146; LOC103448310
GO:0005375	copper ion transmembrane transporter activity	molecular_function	5	3500	14	25472	0.00748098	0.0671952	2.59918	LOC103410555; LOC103411985; LOC103439599; LOC103450504; LOC103452771
GO:0006972	hyperosmotic response	biological_process	5	3500	14	25472	0.00748098	0.0671952	2.59918	LOC103421474; LOC103422182; LOC103445953; LOC114821175; LOC114825669
GO:0051213	dioxygenase activity	molecular_function	36	3500	181	25472	0.00804889	0.0721123	1.4475	LOC103400792; LOC103401823; LOC103403426; LOC103406711; LOC103406983; LOC103413348; LOC103415830; LOC103417975; LOC103419614; LOC103420666; LOC103422593; LOC103425161; LOC103428562; LOC103429438; LOC103430299; LOC103434093; LOC103437326; LOC103437327; LOC103437336; LOC103444109; LOC103444603; LOC103444617; LOC103444963; LOC103446074; LOC103446689; LOC103446740; LOC103447496; LOC103448535; LOC1034…
GO:0010304	PSII associated light-harvesting complex II catabolic process	biological_process	3	3500	7	25472	0.00880465	0.0731046	3.11902	LOC103400502; LOC103442354; LOC103448940
GO:0009558	embryo sac cellularization	biological_process	3	3500	7	25472	0.00880465	0.0731046	3.11902	LOC103402602; LOC103426753; LOC103440003
GO:0016846	carbon-sulfur lyase activity	molecular_function	3	3500	7	25472	0.00880465	0.0731046	3.11902	LOC103403054; LOC103448895; LOC103452013
GO:0006090	pyruvate metabolic process	biological_process	3	3500	7	25472	0.00880465	0.0731046	3.11902	LOC103403813; LOC103403814; LOC103424027
GO:0034440	lipid oxidation	biological_process	3	3500	7	25472	0.00880465	0.0731046	3.11902	LOC103403905; LOC103416677; LOC103422586
GO:0047274	galactinol-sucrose galactosyltransferase activity	molecular_function	3	3500	7	25472	0.00880465	0.0731046	3.11902	LOC103404306; LOC103416906; LOC103425172
GO:0010541	acropetal auxin transport	biological_process	3	3500	7	25472	0.00880465	0.0731046	3.11902	LOC103404434; LOC103405234; LOC103442343
GO:0071669	plant-type cell wall organization or biogenesis	biological_process	3	3500	7	25472	0.00880465	0.0731046	3.11902	LOC103404652; LOC103437908; LOC103445182
GO:0052640	salicylic acid glucosyltransferase (glucoside-forming) activity	molecular_function	3	3500	7	25472	0.00880465	0.0731046	3.11902	LOC103406365; LOC103426549; LOC114824505
GO:0047458	beta-pyrazolylalanine synthase activity	molecular_function	3	3500	7	25472	0.00880465	0.0731046	3.11902	LOC103408707; LOC103434138; LOC103434146
GO:0050234	pyrazolylalanine synthase activity	molecular_function	3	3500	7	25472	0.00880465	0.0731046	3.11902	LOC103408707; LOC103434138; LOC103434146
GO:0050461	L-mimosine synthase activity	molecular_function	3	3500	7	25472	0.00880465	0.0731046	3.11902	LOC103408707; LOC103434138; LOC103434146
GO:0030643	cellular phosphate ion homeostasis	biological_process	3	3500	7	25472	0.00880465	0.0731046	3.11902	LOC103411114; LOC103423459; LOC103455654
GO:0004053	arginase activity	molecular_function	3	3500	7	25472	0.00880465	0.0731046	3.11902	LOC103413684; LOC103426874; LOC103449463
GO:0008783	agmatinase activity	molecular_function	3	3500	7	25472	0.00880465	0.0731046	3.11902	LOC103413684; LOC103426874; LOC103449463
GO:0033389	putrescine biosynthetic process from arginine, using agmatinase	biological_process	3	3500	7	25472	0.00880465	0.0731046	3.11902	LOC103413684; LOC103426874; LOC103449463
GO:0006226	dUMP biosynthetic process	biological_process	3	3500	7	25472	0.00880465	0.0731046	3.11902	LOC103415158; LOC103440429; LOC103440505
GO:0009884	cytokinin receptor activity	molecular_function	3	3500	7	25472	0.00880465	0.0731046	3.11902	LOC103416597; LOC103422017; LOC103451518
GO:0071329	cellular response to sucrose stimulus	biological_process	3	3500	7	25472	0.00880465	0.0731046	3.11902	LOC103416597; LOC103422017; LOC103451518
GO:0004737	pyruvate decarboxylase activity	molecular_function	3	3500	7	25472	0.00880465	0.0731046	3.11902	LOC103419936; LOC103425929; LOC103451198
GO:0016131	brassinosteroid metabolic process	biological_process	3	3500	7	25472	0.00880465	0.0731046	3.11902	LOC103420971; LOC103440490; LOC103440492
GO:0050378	UDP-glucuronate 4-epimerase activity	molecular_function	3	3500	7	25472	0.00880465	0.0731046	3.11902	LOC103425033; LOC103435476; LOC103443417
GO:0016616	oxidoreductase activity, acting on the CH-OH group of donors, NAD or NADP as acceptor	molecular_function	12	3500	47	25472	0.00903986	0.0731046	1.85814	LOC103412848; LOC103412921; LOC103420490; LOC103424888; LOC103427062; LOC103429871; LOC103436695; LOC103438439; LOC103442495; LOC103444758; LOC103445311; LOC114823694
GO:0016621	cinnamoyl-CoA reductase activity	molecular_function	7	3500	23	25472	0.00904805	0.0731046	2.21496	LOC103420490; LOC103424888; LOC103427062; LOC103429871; LOC103436695; LOC103438439; LOC114823694
GO:0009899	ent-kaurene synthase activity	molecular_function	2	3500	4	25472	0.00930158	0.0731046	3.63886	LOC103400427; LOC103415767
GO:0042409	caffeoyl-CoA O-methyltransferase activity	molecular_function	2	3500	4	25472	0.00930158	0.0731046	3.63886	LOC103400753; LOC103430041
GO:0019222	regulation of metabolic process	biological_process	2	3500	4	25472	0.00930158	0.0731046	3.63886	LOC103401608; LOC103422932
GO:0043546	molybdopterin cofactor binding	molecular_function	2	3500	4	25472	0.00930158	0.0731046	3.63886	LOC103401883; LOC103439424
GO:0080097	L-tryptophan:pyruvate aminotransferase activity	molecular_function	2	3500	4	25472	0.00930158	0.0731046	3.63886	LOC103403054; LOC103452013
GO:0071484	cellular response to light intensity	biological_process	2	3500	4	25472	0.00930158	0.0731046	3.63886	LOC103403579; LOC103442529
GO:0032196	transposition	biological_process	2	3500	4	25472	0.00930158	0.0731046	3.63886	LOC103404471; LOC114821558
GO:0043007	maintenance of rDNA	biological_process	2	3500	4	25472	0.00930158	0.0731046	3.63886	LOC103405483; LOC114822098
GO:0004455	ketol-acid reductoisomerase activity	molecular_function	2	3500	4	25472	0.00930158	0.0731046	3.63886	LOC103405563; LOC114822481
GO:0061635	regulation of protein complex stability	biological_process	2	3500	4	25472	0.00930158	0.0731046	3.63886	LOC103409987; LOC103416517
GO:0060862	negative regulation of floral organ abscission	biological_process	2	3500	4	25472	0.00930158	0.0731046	3.63886	LOC103412715; LOC114823012
GO:0072659	protein localization to plasma membrane	biological_process	2	3500	4	25472	0.00930158	0.0731046	3.63886	LOC103413615; LOC103414060
GO:0016871	cycloartenol synthase activity	molecular_function	2	3500	4	25472	0.00930158	0.0731046	3.63886	LOC103416907; LOC103453651
GO:0006287	base-excision repair, gap-filling	biological_process	2	3500	4	25472	0.00930158	0.0731046	3.63886	LOC103422885; LOC103424256
GO:0045004	DNA replication proofreading	biological_process	2	3500	4	25472	0.00930158	0.0731046	3.63886	LOC103422885; LOC103424256
GO:0040020	regulation of meiotic nuclear division	biological_process	2	3500	4	25472	0.00930158	0.0731046	3.63886	LOC103425438; LOC114826890
GO:0016207	4-coumarate-CoA ligase activity	molecular_function	2	3500	4	25472	0.00930158	0.0731046	3.63886	LOC103426517; LOC103427406
GO:0047987	hydroperoxide dehydratase activity	molecular_function	2	3500	4	25472	0.00930158	0.0731046	3.63886	LOC103428639; LOC103440454
GO:0009808	lignin metabolic process	biological_process	2	3500	4	25472	0.00930158	0.0731046	3.63886	LOC103431726; LOC103441803
GO:0016843	amine-lyase activity	molecular_function	2	3500	4	25472	0.00930158	0.0731046	3.63886	LOC103433606; LOC103452951
GO:0005267	potassium channel activity	molecular_function	2	3500	4	25472	0.00930158	0.0731046	3.63886	LOC103435169; LOC103446212
GO:0004659	prenyltransferase activity	molecular_function	2	3500	4	25472	0.00930158	0.0731046	3.63886	LOC103435174; LOC103444873
GO:0032212	positive regulation of telomere maintenance via telomerase	biological_process	2	3500	4	25472	0.00930158	0.0731046	3.63886	LOC103438243; LOC108174052
GO:0010487	thermospermine synthase activity	molecular_function	2	3500	4	25472	0.00930158	0.0731046	3.63886	LOC103440896; LOC103455791
GO:0010055	atrichoblast differentiation	biological_process	2	3500	4	25472	0.00930158	0.0731046	3.63886	LOC103442120; LOC103452169
GO:0032107	regulation of response to nutrient levels	biological_process	2	3500	4	25472	0.00930158	0.0731046	3.63886	LOC103442120; LOC103452169
GO:0043620	regulation of DNA-templated transcription in response to stress	biological_process	2	3500	4	25472	0.00930158	0.0731046	3.63886	LOC103442120; LOC103452169
GO:1990931	RNA N6-methyladenosine dioxygenase activity	molecular_function	2	3500	4	25472	0.00930158	0.0731046	3.63886	LOC103444603; LOC103449078
GO:1901135	carbohydrate derivative metabolic process	biological_process	2	3500	4	25472	0.00930158	0.0731046	3.63886	LOC103445619; LOC103451152
GO:0050486	intramolecular transferase activity, transferring hydroxy groups	molecular_function	2	3500	4	25472	0.00930158	0.0731046	3.63886	LOC108169884; LOC114820704
GO:0009413	response to flooding	biological_process	2	3500	4	25472	0.00930158	0.0731046	3.63886	LOC114820115; NAC23
GO:0008375	acetylglucosaminyltransferase activity	molecular_function	6	3500	19	25472	0.0102041	0.0798411	2.29823	LOC103400428; LOC103405225; LOC103422182; LOC103430432; LOC103448686; LOC103449357
GO:0017112	Rab guanyl-nucleotide exchange factor activity	molecular_function	6	3500	19	25472	0.0102041	0.0798411	2.29823	LOC103402905; LOC103427678; LOC103438556; LOC103444246; LOC103445186; LOC103451839
GO:0006952	defense response	biological_process	142	3500	866	25472	0.010348	0.0807877	1.19334	LOC103400792; LOC103401068; LOC103402025; LOC103402159; LOC103402574; LOC103402575; LOC103402819; LOC103403673; LOC103403675; LOC103403751; LOC103404313; LOC103404419; LOC103405327; LOC103406365; LOC103406605; LOC103406610; LOC103407049; LOC103407180; LOC103407821; LOC103408753; LOC103409937; LOC103410198; LOC103410605; LOC103410973; LOC103412440; LOC103412444; LOC103412608; LOC103412892; LOC1034…
GO:0080167	response to karrikin	biological_process	27	3500	131	25472	0.0107434	0.0836889	1.49999	LOC103403776; LOC103404225; LOC103406209; LOC103411133; LOC103415388; LOC103418494; LOC103422167; LOC103427035; LOC103430446; LOC103433124; LOC103434694; LOC103437302; LOC103439320; LOC103439495; LOC103440030; LOC103442157; LOC103444603; LOC103446608; LOC103446833; LOC103449078; LOC103451886; LOC103452346; LOC103454409; LOC108173554; LOC114820509; LOC114824783; LOC114827601
GO:0030001	metal ion transport	biological_process	18	3500	80	25472	0.010857	0.0841706	1.63749	LOC103406428; LOC103408627; LOC103416806; LOC103417891; LOC103418025; LOC103422887; LOC103423320; LOC103423563; LOC103425642; LOC103432549; LOC103437526; LOC103439204; LOC103439755; LOC103439809; LOC108173943; LOC114819690; LOC114823685; LOC114827637
GO:0030286	dynein complex	cellular_component	4	3500	11	25472	0.0109725	0.0841706	2.64644	LOC103400446; LOC103405459; LOC103426601; LOC103427833
GO:0016308	1-phosphatidylinositol-4-phosphate 5-kinase activity	molecular_function	4	3500	11	25472	0.0109725	0.0841706	2.64644	LOC103401888; LOC103410183; LOC103438623; LOC103439427
GO:0009685	gibberellin metabolic process	biological_process	4	3500	11	25472	0.0109725	0.0841706	2.64644	LOC103403426; LOC103419614; LOC103444617; LOC114823887
GO:0030437	ascospore formation	biological_process	4	3500	11	25472	0.0109725	0.0841706	2.64644	LOC103405459; LOC103427833; LOC103444583; LOC103454139
GO:0007076	mitotic chromosome condensation	biological_process	4	3500	11	25472	0.0109725	0.0841706	2.64644	LOC103405722; LOC103406008; LOC103418804; LOC103444368
GO:0019139	cytokinin dehydrogenase activity	molecular_function	4	3500	11	25472	0.0109725	0.0841706	2.64644	LOC103412527; LOC103438473; LOC103440288; LOC108172967
GO:0015976	carbon utilization	biological_process	5	3500	15	25472	0.011037	0.0842981	2.4259	LOC103405011; LOC103410911; LOC103421479; LOC103425818; LOC103451971
GO:0019899	enzyme binding	molecular_function	5	3500	15	25472	0.011037	0.0842981	2.4259	LOC103422017; LOC103424902; LOC103432719; LOC103436965; LOC103451518
GO:0031408	oxylipin biosynthetic process	biological_process	19	3500	86	25472	0.0115406	0.0879537	1.60787	LOC103403905; LOC103415175; LOC103416677; LOC103422586; LOC103428639; LOC103429090; LOC103429319; LOC103438366; LOC103440310; LOC103440454; LOC103445041; LOC103445421; LOC103447536; LOC103450936; LOC103453627; LOC103454377; LOC103454479; LOC103455025; LOC114825931
GO:0010053	root epidermal cell differentiation	biological_process	8	3500	29	25472	0.0129807	0.0904236	2.00765	LOC103400659; LOC103403150; LOC103409996; LOC103417569; LOC103431926; LOC103435740; LOC103445588; LOC103453829
GO:0071215	cellular response to abscisic acid stimulus	biological_process	9	3500	34	25472	0.0134488	0.0904236	1.92645	LOC103402375; LOC103413741; LOC103416597; LOC103417767; LOC103426927; LOC103446472; LOC108172134; LOC114825962; LOC114827601
GO:0060918	auxin transport	biological_process	6	3500	20	25472	0.0138692	0.0904236	2.18331	LOC103402803; LOC103404434; LOC103405234; LOC103423783; LOC103442343; LOC103450713
GO:0015250	water channel activity	molecular_function	7	3500	25	25472	0.0155227	0.0904236	2.03776	LOC103424405; LOC103427215; LOC103428693; LOC103429984; LOC103444918; LOC103447881; LOC103449988
GO:0045737	positive regulation of cyclin-dependent protein serine/threonine kinase activity	biological_process	5	3500	16	25472	0.015639	0.0904236	2.27429	LOC103413641; LOC103433937; LOC103435871; LOC103440985; LOC103445887
GO:0090698	post-embryonic plant morphogenesis	biological_process	5	3500	16	25472	0.015639	0.0904236	2.27429	LOC103419892; LOC103422375; LOC103445622; LOC103451069; LOC114824980
GO:0009098	leucine biosynthetic process	biological_process	5	3500	16	25472	0.015639	0.0904236	2.27429	LOC103431826; LOC103436029; LOC103445182; LOC108169884; LOC114820704
GO:0009815	1-aminocyclopropane-1-carboxylate oxidase activity	molecular_function	3	3500	8	25472	0.0157059	0.0904236	2.72914	LOC103400792; LOC103434461; LOC103446762
GO:0043481	anthocyanin accumulation in tissues in response to UV light	biological_process	3	3500	8	25472	0.0157059	0.0904236	2.72914	LOC103404434; LOC103405234; LOC103442343
GO:0006564	L-serine biosynthetic process	biological_process	3	3500	8	25472	0.0157059	0.0904236	2.72914	LOC103405207; LOC103424563; LOC103454697
GO:0004310	farnesyl-diphosphate farnesyltransferase activity	molecular_function	3	3500	8	25472	0.0157059	0.0904236	2.72914	LOC103405286; LOC103414696; LOC103415087
GO:0051996	squalene synthase activity	molecular_function	3	3500	8	25472	0.0157059	0.0904236	2.72914	LOC103405286; LOC103414696; LOC103415087
GO:0009943	adaxial/abaxial axis specification	biological_process	3	3500	8	25472	0.0157059	0.0904236	2.72914	LOC103405834; LOC103405871; LOC103438264
GO:0009642	response to light intensity	biological_process	3	3500	8	25472	0.0157059	0.0904236	2.72914	LOC103405974; LOC103425493; LOC103453726
GO:0000799	nuclear condensin complex	cellular_component	3	3500	8	25472	0.0157059	0.0904236	2.72914	LOC103406008; LOC103418804; LOC103444368
GO:0017176	phosphatidylinositol N-acetylglucosaminyltransferase activity	molecular_function	3	3500	8	25472	0.0157059	0.0904236	2.72914	LOC103406799; LOC103446998; LOC114825197
GO:0080151	positive regulation of salicylic acid mediated signaling pathway	biological_process	3	3500	8	25472	0.0157059	0.0904236	2.72914	LOC103422275; LOC103449108; LOC108171274
GO:0004557	alpha-galactosidase activity	molecular_function	3	3500	8	25472	0.0157059	0.0904236	2.72914	LOC103434744; LOC103435060; LOC103447719
GO:0030267	glyoxylate reductase (NADP) activity	molecular_function	3	3500	8	25472	0.0157059	0.0904236	2.72914	LOC103439098; LOC103439114; LOC103443798
GO:0010109	regulation of photosynthesis	biological_process	3	3500	8	25472	0.0157059	0.0904236	2.72914	LOC103439804; LOC103441922; LOC103456109
GO:0008053	mitochondrial fusion	biological_process	3	3500	8	25472	0.0157059	0.0904236	2.72914	LOC103445872; LOC108169256; LOC108169277
GO:0034982	mitochondrial protein processing	biological_process	3	3500	8	25472	0.0157059	0.0904236	2.72914	LOC103445872; LOC108169256; LOC108169277
GO:0070300	phosphatidic acid binding	molecular_function	8	3500	30	25472	0.0163339	0.0904236	1.94072	LOC103402905; LOC103416997; LOC103438556; LOC103444246; LOC103445186; LOC103451839; LOC103452718; LOC108174587
GO:0050829	defense response to Gram-negative bacterium	biological_process	10	3500	40	25472	0.0164035	0.0904236	1.81943	LOC103417055; LOC103422400; LOC103425033; LOC103425823; LOC103425824; LOC103435476; LOC103443417; LOC103443836; LOC103455264; LOC114826808
GO:0010555	response to mannitol	biological_process	4	3500	12	25472	0.0167091	0.0904236	2.4259	LOC103402202; LOC103415011; LOC103433849; LOC103439747
GO:0004372	glycine hydroxymethyltransferase activity	molecular_function	4	3500	12	25472	0.0167091	0.0904236	2.4259	LOC103405877; LOC103431625; LOC103443414; LOC103446887
GO:0019264	glycine biosynthetic process from serine	biological_process	4	3500	12	25472	0.0167091	0.0904236	2.4259	LOC103405877; LOC103431625; LOC103443414; LOC103446887
GO:0010336	gibberellic acid homeostasis	biological_process	4	3500	12	25472	0.0167091	0.0904236	2.4259	LOC103406741; LOC103407598; LOC103418693; LOC103451661
GO:0042285	xylosyltransferase activity	molecular_function	4	3500	12	25472	0.0167091	0.0904236	2.4259	LOC103407929; LOC103416248; LOC103416637; LOC103448450
GO:0080148	negative regulation of response to water deprivation	biological_process	4	3500	12	25472	0.0167091	0.0904236	2.4259	LOC103413424; LOC103428408; LOC103451886; LOC103452346
GO:0004367	glycerol-3-phosphate dehydrogenase [NAD+] activity	molecular_function	4	3500	12	25472	0.0167091	0.0904236	2.4259	LOC103426366; LOC103428073; LOC103433953; LOC103454484
GO:0009331	glycerol-3-phosphate dehydrogenase complex	cellular_component	4	3500	12	25472	0.0167091	0.0904236	2.4259	LOC103426366; LOC103428073; LOC103433953; LOC103454484
GO:0046168	glycerol-3-phosphate catabolic process	biological_process	4	3500	12	25472	0.0167091	0.0904236	2.4259	LOC103426366; LOC103428073; LOC103433953; LOC103454484
GO:0009636	response to toxic substance	biological_process	12	3500	51	25472	0.0181274	0.0904236	1.7124	LOC103408400; LOC103411220; LOC103413791; LOC103419315; LOC103423404; LOC103429156; LOC103433458; LOC103442429; LOC103449169; LOC103450272; LOC103450273; LOC114824380
GO:0010255	glucose mediated signaling pathway	biological_process	1	3500	2	25472	0.0188757	0.0904236	3.63886	GATA5
GO:0051171	regulation of nitrogen compound metabolic process	biological_process	1	3500	2	25472	0.0188757	0.0904236	3.63886	GATA5
GO:0004642	phosphoribosylformylglycinamidine synthase activity	molecular_function	1	3500	2	25472	0.0188757	0.0904236	3.63886	LOC103400609
GO:0052386	cell wall thickening	biological_process	1	3500	2	25472	0.0188757	0.0904236	3.63886	LOC103401242
GO:0015174	basic amino acid transmembrane transporter activity	molecular_function	1	3500	2	25472	0.0188757	0.0904236	3.63886	LOC103401243
GO:0034488	basic amino acid transmembrane export from vacuole	biological_process	1	3500	2	25472	0.0188757	0.0904236	3.63886	LOC103401243
GO:0071627	integral component of fungal-type vacuolar membrane	cellular_component	1	3500	2	25472	0.0188757	0.0904236	3.63886	LOC103401243
GO:0010242	oxygen evolving activity	molecular_function	1	3500	2	25472	0.0188757	0.0904236	3.63886	LOC103401257
GO:0010383	cell wall polysaccharide metabolic process	biological_process	1	3500	2	25472	0.0188757	0.0904236	3.63886	LOC103401308
GO:0047513	1,2-alpha-L-fucosidase activity	molecular_function	1	3500	2	25472	0.0188757	0.0904236	3.63886	LOC103401308
GO:0010012	steroid 22-alpha hydroxylase activity	molecular_function	1	3500	2	25472	0.0188757	0.0904236	3.63886	LOC103401541
GO:0004639	phosphoribosylaminoimidazolesuccinocarboxamide synthase activity	molecular_function	1	3500	2	25472	0.0188757	0.0904236	3.63886	LOC103401954
GO:0045596	negative regulation of cell differentiation	biological_process	1	3500	2	25472	0.0188757	0.0904236	3.63886	LOC103402159
GO:0051019	mitogen-activated protein kinase binding	molecular_function	1	3500	2	25472	0.0188757	0.0904236	3.63886	LOC103402159
GO:0009606	tropism	biological_process	1	3500	2	25472	0.0188757	0.0904236	3.63886	LOC103402598
GO:0000740	nuclear membrane fusion	biological_process	1	3500	2	25472	0.0188757	0.0904236	3.63886	LOC103402602
GO:0010198	synergid death	biological_process	1	3500	2	25472	0.0188757	0.0904236	3.63886	LOC103402602
GO:0004000	adenosine deaminase activity	molecular_function	1	3500	2	25472	0.0188757	0.0904236	3.63886	LOC103403197
GO:0050270	S-adenosylhomocysteine deaminase activity	molecular_function	1	3500	2	25472	0.0188757	0.0904236	3.63886	LOC103403197
GO:0004844	uracil DNA N-glycosylase activity	molecular_function	1	3500	2	25472	0.0188757	0.0904236	3.63886	LOC103403419
GO:0097510	base-excision repair, AP site formation via deaminated base removal	biological_process	1	3500	2	25472	0.0188757	0.0904236	3.63886	LOC103403419
GO:0000914	phragmoplast assembly	biological_process	1	3500	2	25472	0.0188757	0.0904236	3.63886	LOC103403793
GO:0007349	cellularization	biological_process	1	3500	2	25472	0.0188757	0.0904236	3.63886	LOC103403793
GO:0015115	silicate transmembrane transporter activity	molecular_function	1	3500	2	25472	0.0188757	0.0904236	3.63886	LOC103404445
GO:0015708	silicic acid import across plasma membrane	biological_process	1	3500	2	25472	0.0188757	0.0904236	3.63886	LOC103404445
GO:0001004	RNA polymerase III transcription regulator recruiting activity	molecular_function	1	3500	2	25472	0.0188757	0.0904236	3.63886	LOC103405186
GO:0015865	purine nucleotide transport	biological_process	1	3500	2	25472	0.0188757	0.0904236	3.63886	LOC103405649
GO:0004591	oxoglutarate dehydrogenase (succinyl-transferring) activity	molecular_function	1	3500	2	25472	0.0188757	0.0904236	3.63886	LOC103406342
GO:0009353	mitochondrial oxoglutarate dehydrogenase complex	cellular_component	1	3500	2	25472	0.0188757	0.0904236	3.63886	LOC103406342
GO:0033206	meiotic cytokinesis	biological_process	1	3500	2	25472	0.0188757	0.0904236	3.63886	LOC103406741
GO:1905614	negative regulation of developmental vegetative growth	biological_process	1	3500	2	25472	0.0188757	0.0904236	3.63886	LOC103406741
GO:1905622	negative regulation of leaf development	biological_process	1	3500	2	25472	0.0188757	0.0904236	3.63886	LOC103406741
GO:0004126	cytidine deaminase activity	molecular_function	1	3500	2	25472	0.0188757	0.0904236	3.63886	LOC103406806
GO:0006216	cytidine catabolic process	biological_process	1	3500	2	25472	0.0188757	0.0904236	3.63886	LOC103406806
GO:0009972	cytidine deamination	biological_process	1	3500	2	25472	0.0188757	0.0904236	3.63886	LOC103406806
GO:0047844	deoxycytidine deaminase activity	molecular_function	1	3500	2	25472	0.0188757	0.0904236	3.63886	LOC103406806
GO:0008418	protein-N-terminal asparagine amidohydrolase activity	molecular_function	1	3500	2	25472	0.0188757	0.0904236	3.63886	LOC103407492
GO:0043333	2-octaprenyl-6-methoxy-1,4-benzoquinone methylase activity	molecular_function	1	3500	2	25472	0.0188757	0.0904236	3.63886	LOC103407620
GO:0043429	2-nonaprenyl-6-methoxy-1,4-benzoquinone methyltransferase activity	molecular_function	1	3500	2	25472	0.0188757	0.0904236	3.63886	LOC103407620
GO:0030366	molybdopterin synthase activity	molecular_function	1	3500	2	25472	0.0188757	0.0904236	3.63886	LOC103407849
GO:0046554	malate dehydrogenase (NADP+) activity	molecular_function	1	3500	2	25472	0.0188757	0.0904236	3.63886	LOC103408309
GO:0004856	xylulokinase activity	molecular_function	1	3500	2	25472	0.0188757	0.0904236	3.63886	LOC103410975
GO:0005997	xylulose metabolic process	biological_process	1	3500	2	25472	0.0188757	0.0904236	3.63886	LOC103410975
GO:0008734	L-aspartate oxidase activity	molecular_function	1	3500	2	25472	0.0188757	0.0904236	3.63886	LOC103411161
GO:0044318	L-aspartate:fumarate oxidoreductase activity	molecular_function	1	3500	2	25472	0.0188757	0.0904236	3.63886	LOC103411161
GO:0090416	nicotinate transmembrane transporter activity	molecular_function	1	3500	2	25472	0.0188757	0.0904236	3.63886	LOC103411554
GO:0090417	N-methylnicotinate transmembrane transporter activity	molecular_function	1	3500	2	25472	0.0188757	0.0904236	3.63886	LOC103411554
GO:2001142	nicotinate transport	biological_process	1	3500	2	25472	0.0188757	0.0904236	3.63886	LOC103411554
GO:2001143	N-methylnicotinate transport	biological_process	1	3500	2	25472	0.0188757	0.0904236	3.63886	LOC103411554
GO:0034097	response to cytokine	biological_process	1	3500	2	25472	0.0188757	0.0904236	3.63886	LOC103411622
GO:0004401	histidinol-phosphatase activity	molecular_function	1	3500	2	25472	0.0188757	0.0904236	3.63886	LOC103412081
GO:0036009	protein-glutamine N-methyltransferase activity	molecular_function	1	3500	2	25472	0.0188757	0.0904236	3.63886	LOC103412304
GO:0035753	maintenance of DNA trinucleotide repeats	biological_process	1	3500	2	25472	0.0188757	0.0904236	3.63886	LOC103412575
GO:0060867	fruit abscission	biological_process	1	3500	2	25472	0.0188757	0.0904236	3.63886	LOC103412715
GO:0009268	response to pH	biological_process	1	3500	2	25472	0.0188757	0.0904236	3.63886	LOC103412774
GO:0090322	regulation of superoxide metabolic process	biological_process	1	3500	2	25472	0.0188757	0.0904236	3.63886	LOC103413454
GO:0004452	isopentenyl-diphosphate delta-isomerase activity	molecular_function	1	3500	2	25472	0.0188757	0.0904236	3.63886	LOC103414031
GO:1902440	protein localization to mitotic spindle pole body	biological_process	1	3500	2	25472	0.0188757	0.0904236	3.63886	LOC103414869
GO:1990810	microtubule anchoring at mitotic spindle pole body	biological_process	1	3500	2	25472	0.0188757	0.0904236	3.63886	LOC103414869
GO:1990811	MWP complex	cellular_component	1	3500	2	25472	0.0188757	0.0904236	3.63886	LOC103414869
GO:0004048	anthranilate phosphoribosyltransferase activity	molecular_function	1	3500	2	25472	0.0188757	0.0904236	3.63886	LOC103415235
GO:0030732	methionine S-methyltransferase activity	molecular_function	1	3500	2	25472	0.0188757	0.0904236	3.63886	LOC103416410
GO:0071218	cellular response to misfolded protein	biological_process	1	3500	2	25472	0.0188757	0.0904236	3.63886	LOC103416517
GO:0033728	divinyl chlorophyllide a 8-vinyl-reductase activity	molecular_function	1	3500	2	25472	0.0188757	0.0904236	3.63886	LOC103416790
GO:0010586	miRNA metabolic process	biological_process	1	3500	2	25472	0.0188757	0.0904236	3.63886	LOC103416856
GO:0035019	somatic stem cell population maintenance	biological_process	1	3500	2	25472	0.0188757	0.0904236	3.63886	LOC103416856
GO:0016504	peptidase activator activity	molecular_function	1	3500	2	25472	0.0188757	0.0904236	3.63886	LOC103416950
GO:0009671	nitrate:proton symporter activity	molecular_function	1	3500	2	25472	0.0188757	0.0904236	3.63886	LOC103417019
GO:0080028	nitrile biosynthetic process	biological_process	1	3500	2	25472	0.0188757	0.0904236	3.63886	LOC103417202
GO:0042550	photosystem I stabilization	biological_process	1	3500	2	25472	0.0188757	0.0904236	3.63886	LOC103417553
GO:0019374	galactolipid metabolic process	biological_process	1	3500	2	25472	0.0188757	0.0904236	3.63886	LOC103417972
GO:0035250	UDP-galactosyltransferase activity	molecular_function	1	3500	2	25472	0.0188757	0.0904236	3.63886	LOC103417972
GO:0035035	histone acetyltransferase binding	molecular_function	1	3500	2	25472	0.0188757	0.0904236	3.63886	LOC103418657
GO:0008676	3-deoxy-8-phosphooctulonate synthase activity	molecular_function	1	3500	2	25472	0.0188757	0.0904236	3.63886	LOC103419802
GO:2000117	negative regulation of cysteine-type endopeptidase activity	biological_process	1	3500	2	25472	0.0188757	0.0904236	3.63886	LOC103420175
GO:0004668	protein-arginine deiminase activity	molecular_function	1	3500	2	25472	0.0188757	0.0904236	3.63886	LOC103420360
GO:0047632	agmatine deiminase activity	molecular_function	1	3500	2	25472	0.0188757	0.0904236	3.63886	LOC103420360
GO:0004163	diphosphomevalonate decarboxylase activity	molecular_function	1	3500	2	25472	0.0188757	0.0904236	3.63886	LOC103420566
GO:0003827	alpha-1,3-mannosylglycoprotein 2-beta-N-acetylglucosaminyltransferase activity	molecular_function	1	3500	2	25472	0.0188757	0.0904236	3.63886	LOC103422182
GO:0016262	protein N-acetylglucosaminyltransferase activity	molecular_function	1	3500	2	25472	0.0188757	0.0904236	3.63886	LOC103422182
GO:0004413	homoserine kinase activity	molecular_function	1	3500	2	25472	0.0188757	0.0904236	3.63886	LOC103422185
GO:1905182	positive regulation of urease activity	biological_process	1	3500	2	25472	0.0188757	0.0904236	3.63886	LOC103422293
GO:0000309	nicotinamide-nucleotide adenylyltransferase activity	molecular_function	1	3500	2	25472	0.0188757	0.0904236	3.63886	LOC103422314
GO:0004515	nicotinate-nucleotide adenylyltransferase activity	molecular_function	1	3500	2	25472	0.0188757	0.0904236	3.63886	LOC103422314
GO:0034587	piRNA metabolic process	biological_process	1	3500	2	25472	0.0188757	0.0904236	3.63886	LOC103422322
GO:0003972	RNA ligase (ATP) activity	molecular_function	1	3500	2	25472	0.0188757	0.0904236	3.63886	LOC103422685
GO:0042245	RNA repair	biological_process	1	3500	2	25472	0.0188757	0.0904236	3.63886	LOC103422685
GO:0032942	inositol tetrakisphosphate 2-kinase activity	molecular_function	1	3500	2	25472	0.0188757	0.0904236	3.63886	LOC103423459
GO:0035299	inositol pentakisphosphate 2-kinase activity	molecular_function	1	3500	2	25472	0.0188757	0.0904236	3.63886	LOC103423459
GO:0080065	4-alpha-methyl-delta7-sterol oxidation	biological_process	1	3500	2	25472	0.0188757	0.0904236	3.63886	LOC103423556
GO:0008446	GDP-mannose 4,6-dehydratase activity	molecular_function	1	3500	2	25472	0.0188757	0.0904236	3.63886	LOC103424268
GO:0019673	GDP-mannose metabolic process	biological_process	1	3500	2	25472	0.0188757	0.0904236	3.63886	LOC103424268
GO:0034986	iron chaperone activity	molecular_function	1	3500	2	25472	0.0188757	0.0904236	3.63886	LOC103425927
GO:1903329	regulation of iron-sulfur cluster assembly	biological_process	1	3500	2	25472	0.0188757	0.0904236	3.63886	LOC103425927
GO:0018874	benzoate metabolic process	biological_process	1	3500	2	25472	0.0188757	0.0904236	3.63886	LOC103426549
GO:0046482	para-aminobenzoic acid metabolic process	biological_process	1	3500	2	25472	0.0188757	0.0904236	3.63886	LOC103426549
GO:0052639	salicylic acid glucosyltransferase (ester-forming) activity	molecular_function	1	3500	2	25472	0.0188757	0.0904236	3.63886	LOC103426549
GO:0052641	benzoic acid glucosyltransferase activity	molecular_function	1	3500	2	25472	0.0188757	0.0904236	3.63886	LOC103426549
GO:0080002	UDP-glucose:4-aminobenzoate acylglucosyltransferase activity	molecular_function	1	3500	2	25472	0.0188757	0.0904236	3.63886	LOC103426549
GO:0090704	nicotinate-O-glucosyltransferase activity	molecular_function	1	3500	2	25472	0.0188757	0.0904236	3.63886	LOC103426549
GO:0003935	GTP cyclohydrolase II activity	molecular_function	1	3500	2	25472	0.0188757	0.0904236	3.63886	LOC103427171
GO:0008686	3,4-dihydroxy-2-butanone-4-phosphate synthase activity	molecular_function	1	3500	2	25472	0.0188757	0.0904236	3.63886	LOC103427171
GO:0048257	3'-flap endonuclease activity	molecular_function	1	3500	2	25472	0.0188757	0.0904236	3.63886	LOC103428449
GO:0004164	diphthine synthase activity	molecular_function	1	3500	2	25472	0.0188757	0.0904236	3.63886	LOC103428613
GO:0004631	phosphomevalonate kinase activity	molecular_function	1	3500	2	25472	0.0188757	0.0904236	3.63886	LOC103429390
GO:0019210	kinase inhibitor activity	molecular_function	1	3500	2	25472	0.0188757	0.0904236	3.63886	LOC103429613
GO:0010442	guard cell morphogenesis	biological_process	1	3500	2	25472	0.0188757	0.0904236	3.63886	LOC103430075
GO:0052541	plant-type cell wall cellulose metabolic process	biological_process	1	3500	2	25472	0.0188757	0.0904236	3.63886	LOC103430075
GO:0008495	protoheme IX farnesyltransferase activity	molecular_function	1	3500	2	25472	0.0188757	0.0904236	3.63886	LOC103431812
GO:0048034	heme O biosynthetic process	biological_process	1	3500	2	25472	0.0188757	0.0904236	3.63886	LOC103431812
GO:0043100	pyrimidine nucleobase salvage	biological_process	1	3500	2	25472	0.0188757	0.0904236	3.63886	LOC103431842
GO:0046820	4-amino-4-deoxychorismate synthase activity	molecular_function	1	3500	2	25472	0.0188757	0.0904236	3.63886	LOC103432054
GO:1900384	regulation of flavonol biosynthetic process	biological_process	1	3500	2	25472	0.0188757	0.0904236	3.63886	LOC103432314
GO:0004343	glucosamine 6-phosphate N-acetyltransferase activity	molecular_function	1	3500	2	25472	0.0188757	0.0904236	3.63886	LOC103433255
GO:0006044	N-acetylglucosamine metabolic process	biological_process	1	3500	2	25472	0.0188757	0.0904236	3.63886	LOC103433255
GO:0006045	N-acetylglucosamine biosynthetic process	biological_process	1	3500	2	25472	0.0188757	0.0904236	3.63886	LOC103433255
GO:0004563	beta-N-acetylhexosaminidase activity	molecular_function	1	3500	2	25472	0.0188757	0.0904236	3.63886	LOC103433494
GO:0015929	hexosaminidase activity	molecular_function	1	3500	2	25472	0.0188757	0.0904236	3.63886	LOC103433494
GO:0102148	N-acetyl-beta-D-galactosaminidase activity	molecular_function	1	3500	2	25472	0.0188757	0.0904236	3.63886	LOC103433494
GO:0071479	cellular response to ionizing radiation	biological_process	1	3500	2	25472	0.0188757	0.0904236	3.63886	LOC103433915
GO:1990069	stomatal opening	biological_process	1	3500	2	25472	0.0188757	0.0904236	3.63886	LOC103433937
GO:0046471	phosphatidylglycerol metabolic process	biological_process	1	3500	2	25472	0.0188757	0.0904236	3.63886	LOC103434694
GO:0052637	delta 3-trans-hexadecenoic acid phosphatidylglycerol desaturase activity	molecular_function	1	3500	2	25472	0.0188757	0.0904236	3.63886	LOC103434694
GO:0003002	regionalization	biological_process	1	3500	2	25472	0.0188757	0.0904236	3.63886	LOC103435336
GO:0010455	positive regulation of cell fate commitment	biological_process	1	3500	2	25472	0.0188757	0.0904236	3.63886	LOC103435336
GO:0006792	regulation of sulfur utilization	biological_process	1	3500	2	25472	0.0188757	0.0904236	3.63886	LOC103435818
GO:0090568	nuclear transcriptional repressor complex	cellular_component	1	3500	2	25472	0.0188757	0.0904236	3.63886	LOC103435818
GO:0003934	GTP cyclohydrolase I activity	molecular_function	1	3500	2	25472	0.0188757	0.0904236	3.63886	LOC103435873
GO:0035998	7,8-dihydroneopterin 3'-triphosphate biosynthetic process	biological_process	1	3500	2	25472	0.0188757	0.0904236	3.63886	LOC103435873
GO:0047427	cyanoalanine nitrilase activity	molecular_function	1	3500	2	25472	0.0188757	0.0904236	3.63886	LOC103436098
GO:0008479	queuine tRNA-ribosyltransferase activity	molecular_function	1	3500	2	25472	0.0188757	0.0904236	3.63886	LOC103436462
GO:0047793	cycloeucalenol cycloisomerase activity	molecular_function	1	3500	2	25472	0.0188757	0.0904236	3.63886	LOC103437547
GO:0000140	acylglycerone-phosphate reductase activity	molecular_function	1	3500	2	25472	0.0188757	0.0904236	3.63886	LOC103437610
GO:0102566	1-acyl dihydroxyacetone phosphate reductase activity	molecular_function	1	3500	2	25472	0.0188757	0.0904236	3.63886	LOC103437610
GO:0000783	nuclear telomere cap complex	cellular_component	1	3500	2	25472	0.0188757	0.0904236	3.63886	LOC103438243
GO:0032206	positive regulation of telomere maintenance	biological_process	1	3500	2	25472	0.0188757	0.0904236	3.63886	LOC103438243
GO:0032210	regulation of telomere maintenance via telomerase	biological_process	1	3500	2	25472	0.0188757	0.0904236	3.63886	LOC103438243
GO:0015927	trehalase activity	molecular_function	1	3500	2	25472	0.0188757	0.0904236	3.63886	LOC103438567
GO:0006784	heme a biosynthetic process	biological_process	1	3500	2	25472	0.0188757	0.0904236	3.63886	LOC103438572
GO:0008535	respiratory chain complex IV assembly	biological_process	1	3500	2	25472	0.0188757	0.0904236	3.63886	LOC103438572
GO:0016653	oxidoreductase activity, acting on NAD(P)H, heme protein as acceptor	molecular_function	1	3500	2	25472	0.0188757	0.0904236	3.63886	LOC103438572
GO:0052873	FMN reductase (NADPH) activity	molecular_function	1	3500	2	25472	0.0188757	0.0904236	3.63886	LOC103438622
GO:0051219	phosphoprotein binding	molecular_function	1	3500	2	25472	0.0188757	0.0904236	3.63886	LOC103438778
GO:0071932	replication fork reversal	biological_process	1	3500	2	25472	0.0188757	0.0904236	3.63886	LOC103438958
GO:0072429	response to intra-S DNA damage checkpoint signaling	biological_process	1	3500	2	25472	0.0188757	0.0904236	3.63886	LOC103438958
GO:1990601	5' overhang single-stranded DNA endodeoxyribonuclease activity	molecular_function	1	3500	2	25472	0.0188757	0.0904236	3.63886	LOC103438958
GO:1905183	negative regulation of protein serine/threonine phosphatase activity	biological_process	1	3500	2	25472	0.0188757	0.0904236	3.63886	LOC103439337
GO:0001300	chronological cell aging	biological_process	1	3500	2	25472	0.0188757	0.0904236	3.63886	LOC103439998
GO:0017121	phospholipid scrambling	biological_process	1	3500	2	25472	0.0188757	0.0904236	3.63886	LOC103439998
GO:0017128	phospholipid scramblase activity	molecular_function	1	3500	2	25472	0.0188757	0.0904236	3.63886	LOC103439998
GO:1903147	negative regulation of autophagy of mitochondrion	biological_process	1	3500	2	25472	0.0188757	0.0904236	3.63886	LOC103439998
GO:0019894	kinesin binding	molecular_function	1	3500	2	25472	0.0188757	0.0904236	3.63886	LOC103440003
GO:0042219	cellular modified amino acid catabolic process	biological_process	1	3500	2	25472	0.0188757	0.0904236	3.63886	LOC103440030
GO:0061929	gamma-glutamylaminecyclotransferase activity	molecular_function	1	3500	2	25472	0.0188757	0.0904236	3.63886	LOC103440030
GO:0003996	acyl-CoA ligase activity	molecular_function	1	3500	2	25472	0.0188757	0.0904236	3.63886	LOC103440744
GO:1902182	shoot apical meristem development	biological_process	1	3500	2	25472	0.0188757	0.0904236	3.63886	LOC103441035
GO:1990206	jasmonyl-Ile conjugate hydrolase activity	molecular_function	1	3500	2	25472	0.0188757	0.0904236	3.63886	LOC103441577
GO:0006521	regulation of cellular amino acid metabolic process	biological_process	1	3500	2	25472	0.0188757	0.0904236	3.63886	LOC103441882
GO:0006398	mRNA 3'-end processing by stem-loop binding and cleavage	biological_process	1	3500	2	25472	0.0188757	0.0904236	3.63886	LOC103441945
GO:0045176	apical protein localization	biological_process	1	3500	2	25472	0.0188757	0.0904236	3.63886	LOC103442073
GO:0006873	cellular ion homeostasis	biological_process	1	3500	2	25472	0.0188757	0.0904236	3.63886	LOC103443285
GO:0010179	IAA-Ala conjugate hydrolase activity	molecular_function	1	3500	2	25472	0.0188757	0.0904236	3.63886	LOC103443715
GO:0046901	tetrahydrofolylpolyglutamate biosynthetic process	biological_process	1	3500	2	25472	0.0188757	0.0904236	3.63886	LOC103444473
GO:1904961	quiescent center organization	biological_process	1	3500	2	25472	0.0188757	0.0904236	3.63886	LOC103444473
GO:0008830	dTDP-4-dehydrorhamnose 3,5-epimerase activity	molecular_function	1	3500	2	25472	0.0188757	0.0904236	3.63886	LOC103444758
GO:0008831	dTDP-4-dehydrorhamnose reductase activity	molecular_function	1	3500	2	25472	0.0188757	0.0904236	3.63886	LOC103444758
GO:0071461	cellular response to redox state	biological_process	1	3500	2	25472	0.0188757	0.0904236	3.63886	LOC103445157
GO:0009923	fatty acid elongase complex	cellular_component	1	3500	2	25472	0.0188757	0.0904236	3.63886	LOC103445586
GO:0102758	very-long-chain enoyl-CoA reductase activity	molecular_function	1	3500	2	25472	0.0188757	0.0904236	3.63886	LOC103445586
GO:0019146	arabinose-5-phosphate isomerase activity	molecular_function	1	3500	2	25472	0.0188757	0.0904236	3.63886	LOC103445619
GO:0004399	histidinol dehydrogenase activity	molecular_function	1	3500	2	25472	0.0188757	0.0904236	3.63886	LOC103446103
GO:0008756	o-succinylbenzoate-CoA ligase activity	molecular_function	1	3500	2	25472	0.0188757	0.0904236	3.63886	LOC103446111
GO:0015319	sodium:inorganic phosphate symporter activity	molecular_function	1	3500	2	25472	0.0188757	0.0904236	3.63886	LOC103446294
GO:0044257	cellular protein catabolic process	biological_process	1	3500	2	25472	0.0188757	0.0904236	3.63886	LOC103446408
GO:2000185	regulation of phosphate transmembrane transport	biological_process	1	3500	2	25472	0.0188757	0.0904236	3.63886	LOC103446408
GO:0008481	sphinganine kinase activity	molecular_function	1	3500	2	25472	0.0188757	0.0904236	3.63886	LOC103446472
GO:0047496	vesicle transport along microtubule	biological_process	1	3500	2	25472	0.0188757	0.0904236	3.63886	LOC103446623
GO:1990050	phosphatidic acid transporter activity	molecular_function	1	3500	2	25472	0.0188757	0.0904236	3.63886	LOC103447135
GO:0010266	response to vitamin B1	biological_process	1	3500	2	25472	0.0188757	0.0904236	3.63886	LOC103447435
GO:0097295	morphine biosynthetic process	biological_process	1	3500	2	25472	0.0188757	0.0904236	3.63886	LOC103447563
GO:0102803	thebane O-demethylase activity	molecular_function	1	3500	2	25472	0.0188757	0.0904236	3.63886	LOC103447563
GO:0102805	codeine O-demethylase activity	molecular_function	1	3500	2	25472	0.0188757	0.0904236	3.63886	LOC103447563
GO:2000083	negative regulation of L-ascorbic acid biosynthetic process	biological_process	1	3500	2	25472	0.0188757	0.0904236	3.63886	LOC103447886
GO:0019365	pyridine nucleotide salvage	biological_process	1	3500	2	25472	0.0188757	0.0904236	3.63886	LOC103448186
GO:0004305	ethanolamine kinase activity	molecular_function	1	3500	2	25472	0.0188757	0.0904236	3.63886	LOC103448253
GO:0060250	germ-line stem-cell niche homeostasis	biological_process	1	3500	2	25472	0.0188757	0.0904236	3.63886	LOC103448726
GO:0009537	proplastid	cellular_component	1	3500	2	25472	0.0188757	0.0904236	3.63886	LOC103449037
GO:0050342	tocopherol O-methyltransferase activity	molecular_function	1	3500	2	25472	0.0188757	0.0904236	3.63886	LOC103449390
GO:0061454	release of sequestered calcium ion into cytosol by Golgi	biological_process	1	3500	2	25472	0.0188757	0.0904236	3.63886	LOC103449500
GO:0031464	Cul4A-RING E3 ubiquitin ligase complex	cellular_component	1	3500	2	25472	0.0188757	0.0904236	3.63886	LOC103449926
GO:0080170	hydrogen peroxide transmembrane transport	biological_process	1	3500	2	25472	0.0188757	0.0904236	3.63886	LOC103449988
GO:0004358	glutamate N-acetyltransferase activity	molecular_function	1	3500	2	25472	0.0188757	0.0904236	3.63886	LOC103450205
GO:0006592	ornithine biosynthetic process	biological_process	1	3500	2	25472	0.0188757	0.0904236	3.63886	LOC103450205
GO:0009415	response to water	biological_process	1	3500	2	25472	0.0188757	0.0904236	3.63886	LOC103450328
GO:0002144	cytosolic tRNA wobble base thiouridylase complex	cellular_component	1	3500	2	25472	0.0188757	0.0904236	3.63886	LOC103450332
GO:0042834	peptidoglycan binding	molecular_function	1	3500	2	25472	0.0188757	0.0904236	3.63886	LOC103450645
GO:0097053	L-kynurenine catabolic process	biological_process	1	3500	2	25472	0.0188757	0.0904236	3.63886	LOC103450660
GO:0008703	5-amino-6-(5-phosphoribosylamino)uracil reductase activity	molecular_function	1	3500	2	25472	0.0188757	0.0904236	3.63886	LOC103451152
GO:0046443	FAD metabolic process	biological_process	1	3500	2	25472	0.0188757	0.0904236	3.63886	LOC103451152
GO:0097708	intracellular vesicle	cellular_component	1	3500	2	25472	0.0188757	0.0904236	3.63886	LOC103451661
GO:0004059	aralkylamine N-acetyltransferase activity	molecular_function	1	3500	2	25472	0.0188757	0.0904236	3.63886	LOC103451714
GO:0010599	production of lsiRNA involved in RNA interference	biological_process	1	3500	2	25472	0.0188757	0.0904236	3.63886	LOC103451783
GO:0052576	carbohydrate storage	biological_process	1	3500	2	25472	0.0188757	0.0904236	3.63886	LOC103451980
GO:0015926	glucosidase activity	molecular_function	1	3500	2	25472	0.0188757	0.0904236	3.63886	LOC103452212
GO:0015231	5-formyltetrahydrofolate transmembrane transporter activity	molecular_function	1	3500	2	25472	0.0188757	0.0904236	3.63886	LOC103453202
GO:0015350	methotrexate transmembrane transporter activity	molecular_function	1	3500	2	25472	0.0188757	0.0904236	3.63886	LOC103453202
GO:0051958	methotrexate transport	biological_process	1	3500	2	25472	0.0188757	0.0904236	3.63886	LOC103453202
GO:0050126	N-carbamoylputrescine amidase activity	molecular_function	1	3500	2	25472	0.0188757	0.0904236	3.63886	LOC103453363
GO:0005254	chloride channel activity	molecular_function	1	3500	2	25472	0.0188757	0.0904236	3.63886	LOC103453540
GO:0010176	homogentisate phytyltransferase activity	molecular_function	1	3500	2	25472	0.0188757	0.0904236	3.63886	LOC103453843
GO:0010210	IAA-Phe conjugate hydrolase activity	molecular_function	1	3500	2	25472	0.0188757	0.0904236	3.63886	LOC103454135
GO:0010211	IAA-Leu conjugate hydrolase activity	molecular_function	1	3500	2	25472	0.0188757	0.0904236	3.63886	LOC103454135
GO:0003937	IMP cyclohydrolase activity	molecular_function	1	3500	2	25472	0.0188757	0.0904236	3.63886	LOC103454139
GO:0004643	phosphoribosylaminoimidazolecarboxamide formyltransferase activity	molecular_function	1	3500	2	25472	0.0188757	0.0904236	3.63886	LOC103454139
GO:0010254	nectary development	biological_process	1	3500	2	25472	0.0188757	0.0904236	3.63886	LOC103454562
GO:0004648	O-phospho-L-serine:2-oxoglutarate aminotransferase activity	molecular_function	1	3500	2	25472	0.0188757	0.0904236	3.63886	LOC103454697
GO:0000215	tRNA 2'-phosphotransferase activity	molecular_function	1	3500	2	25472	0.0188757	0.0904236	3.63886	LOC103454766
GO:0106035	protein maturation by [4Fe-4S] cluster transfer	biological_process	1	3500	2	25472	0.0188757	0.0904236	3.63886	LOC103454766
GO:0061641	CENP-A containing chromatin organization	biological_process	1	3500	2	25472	0.0188757	0.0904236	3.63886	LOC103455456
GO:0090734	site of DNA damage	cellular_component	1	3500	2	25472	0.0188757	0.0904236	3.63886	LOC108174052
GO:0106112	negative regulation of mitotic cohesin ssDNA (lagging strand) loading	biological_process	1	3500	2	25472	0.0188757	0.0904236	3.63886	LOC108174052
GO:0019933	cAMP-mediated signaling	biological_process	1	3500	2	25472	0.0188757	0.0904236	3.63886	LOC114819116
GO:0030476	ascospore wall assembly	biological_process	1	3500	2	25472	0.0188757	0.0904236	3.63886	LOC114819116
GO:0000109	nucleotide-excision repair complex	cellular_component	1	3500	2	25472	0.0188757	0.0904236	3.63886	LOC114819633
GO:0016712	oxidoreductase activity, acting on paired donors, with incorporation or reduction of molecular oxygen, reduced flavin or flavoprotein as one donor, and incorporation of one atom of oxygen	molecular_function	1	3500	2	25472	0.0188757	0.0904236	3.63886	LOC114821119
GO:0016603	glutaminyl-peptide cyclotransferase activity	molecular_function	1	3500	2	25472	0.0188757	0.0904236	3.63886	LOC114821157
GO:0017186	peptidyl-pyroglutamic acid biosynthetic process, using glutaminyl-peptide cyclotransferase	biological_process	1	3500	2	25472	0.0188757	0.0904236	3.63886	LOC114821157
GO:0006482	protein demethylation	biological_process	1	3500	2	25472	0.0188757	0.0904236	3.63886	LOC114821520
GO:0051723	protein methylesterase activity	molecular_function	1	3500	2	25472	0.0188757	0.0904236	3.63886	LOC114821520
GO:0000796	condensin complex	cellular_component	1	3500	2	25472	0.0188757	0.0904236	3.63886	LOC114822124
GO:0052636	arabinosyltransferase activity	molecular_function	1	3500	2	25472	0.0188757	0.0904236	3.63886	LOC114822157
GO:0015662	ATPase activity, coupled to transmembrane movement of ions, phosphorylative mechanism	molecular_function	1	3500	2	25472	0.0188757	0.0904236	3.63886	LOC114822601
GO:0004746	riboflavin synthase activity	molecular_function	1	3500	2	25472	0.0188757	0.0904236	3.63886	LOC114822642
GO:0016532	superoxide dismutase copper chaperone activity	molecular_function	1	3500	2	25472	0.0188757	0.0904236	3.63886	LOC114823685
GO:0048512	circadian behavior	biological_process	1	3500	2	25472	0.0188757	0.0904236	3.63886	LOC114824783
GO:0009081	branched-chain amino acid metabolic process	biological_process	1	3500	2	25472	0.0188757	0.0904236	3.63886	LOC114824835
GO:0016899	oxidoreductase activity, acting on the CH-OH group of donors, oxygen as acceptor	molecular_function	1	3500	2	25472	0.0188757	0.0904236	3.63886	LOC114824986
GO:0052638	indole-3-butyrate beta-glucosyltransferase activity	molecular_function	1	3500	2	25472	0.0188757	0.0904236	3.63886	LOC114827601
GO:0046208	spermine catabolic process	biological_process	1	3500	2	25472	0.0188757	0.0904236	3.63886	PAO
GO:0006520	cellular amino acid metabolic process	biological_process	7	3500	26	25472	0.0197833	0.0931684	1.95938	LOC103405636; LOC103433606; LOC103438445; LOC103452065; LOC103452951; LOC103453876; LOC114824344
GO:0000272	polysaccharide catabolic process	biological_process	13	3500	57	25472	0.0199785	0.0931684	1.65983	LOC103401612; LOC103403788; LOC103405911; LOC103409997; LOC103410311; LOC103417162; LOC103422527; LOC103426493; LOC103441147; LOC103443344; LOC103443354; LOC103452562; LOC103455189
GO:0051287	NAD binding	molecular_function	22	3500	108	25472	0.0202197	0.0931684	1.4825	LOC103403122; LOC103403493; LOC103405050; LOC103405207; LOC103406865; LOC103409404; LOC103420136; LOC103420450; LOC103425187; LOC103425757; LOC103428273; LOC103430843; LOC103433953; LOC103434162; LOC103439098; LOC103439114; LOC103442070; LOC103443062; LOC103443798; LOC103446103; LOC103454484; LOC114825363
GO:0042594	response to starvation	biological_process	8	3500	31	25472	0.0202789	0.0931684	1.87812	LOC103400918; LOC103406845; LOC103411622; LOC103430537; LOC103432419; LOC103433993; LOC103451314; LOC114821343
GO:0019310	inositol catabolic process	biological_process	2	3500	5	25472	0.0208776	0.0931684	2.91109	LOC103400740; LOC103403438
GO:0050113	inositol oxygenase activity	molecular_function	2	3500	5	25472	0.0208776	0.0931684	2.91109	LOC103400740; LOC103403438
GO:0004028	3-chloroallyl aldehyde dehydrogenase activity	molecular_function	2	3500	5	25472	0.0208776	0.0931684	2.91109	LOC103401089; LOC103449962
GO:0006344	maintenance of chromatin silencing	biological_process	2	3500	5	25472	0.0208776	0.0931684	2.91109	LOC103401167; LOC103401564
GO:0004560	alpha-L-fucosidase activity	molecular_function	2	3500	5	25472	0.0208776	0.0931684	2.91109	LOC103401308; LOC103407787
GO:0010358	leaf shaping	biological_process	2	3500	5	25472	0.0208776	0.0931684	2.91109	LOC103401541; LOC103405871
GO:0005960	glycine cleavage complex	cellular_component	2	3500	5	25472	0.0208776	0.0931684	2.91109	LOC103402356; LOC103409716
GO:0016328	lateral plasma membrane	cellular_component	2	3500	5	25472	0.0208776	0.0931684	2.91109	LOC103402598; LOC103455436
GO:0004021	L-alanine:2-oxoglutarate aminotransferase activity	molecular_function	2	3500	5	25472	0.0208776	0.0931684	2.91109	LOC103403054; LOC103452013
GO:0009645	response to low light intensity stimulus	biological_process	2	3500	5	25472	0.0208776	0.0931684	2.91109	LOC103405098; LOC103429202
GO:0016767	geranylgeranyl-diphosphate geranylgeranyltransferase activity	molecular_function	2	3500	5	25472	0.0208776	0.0931684	2.91109	LOC103405286; LOC103415087
GO:0045505	dynein intermediate chain binding	molecular_function	2	3500	5	25472	0.0208776	0.0931684	2.91109	LOC103405459; LOC103427833
GO:0051959	dynein light intermediate chain binding	molecular_function	2	3500	5	25472	0.0208776	0.0931684	2.91109	LOC103405459; LOC103427833
GO:0080029	cellular response to boron-containing substance levels	biological_process	2	3500	5	25472	0.0208776	0.0931684	2.91109	LOC103406473; LOC103421003
GO:0070981	L-asparagine biosynthetic process	biological_process	2	3500	5	25472	0.0208776	0.0931684	2.91109	LOC103406611; LOC103411783
GO:0009852	auxin catabolic process	biological_process	2	3500	5	25472	0.0208776	0.0931684	2.91109	LOC103406983; LOC103446689
GO:0043335	protein unfolding	biological_process	2	3500	5	25472	0.0208776	0.0931684	2.91109	LOC103409766; LOC103438192
GO:0035434	copper ion transmembrane transport	biological_process	2	3500	5	25472	0.0208776	0.0931684	2.91109	LOC103411985; LOC103452771
GO:0006210	thymine catabolic process	biological_process	2	3500	5	25472	0.0208776	0.0931684	2.91109	LOC103411989; LOC103438108
GO:0009882	blue light photoreceptor activity	molecular_function	2	3500	5	25472	0.0208776	0.0931684	2.91109	LOC103412999; LOC103428062
GO:1990058	fruit replum development	biological_process	2	3500	5	25472	0.0208776	0.0931684	2.91109	LOC103416019; LOC103454360
GO:0010258	NADH dehydrogenase complex (plastoquinone) assembly	biological_process	2	3500	5	25472	0.0208776	0.0931684	2.91109	LOC103417828; LOC114821976
GO:0008692	3-hydroxybutyryl-CoA epimerase activity	molecular_function	2	3500	5	25472	0.0208776	0.0931684	2.91109	LOC103418149; LOC103452890
GO:0018812	3-hydroxyacyl-CoA dehydratase activity	molecular_function	2	3500	5	25472	0.0208776	0.0931684	2.91109	LOC103418149; LOC103452890
GO:1990585	hydroxyproline O-arabinosyltransferase activity	molecular_function	2	3500	5	25472	0.0208776	0.0931684	2.91109	LOC103420519; LOC103441245
GO:0002221	pattern recognition receptor signaling pathway	biological_process	2	3500	5	25472	0.0208776	0.0931684	2.91109	LOC103420911; LOC114823246
GO:0004641	phosphoribosylformylglycinamidine cyclo-ligase activity	molecular_function	2	3500	5	25472	0.0208776	0.0931684	2.91109	LOC103421320; LOC103441651
GO:0033611	oxalate catabolic process	biological_process	2	3500	5	25472	0.0208776	0.0931684	2.91109	LOC103422599; LOC114824077
GO:0050203	oxalate-CoA ligase activity	molecular_function	2	3500	5	25472	0.0208776	0.0931684	2.91109	LOC103422599; LOC114824077
GO:0006272	leading strand elongation	biological_process	2	3500	5	25472	0.0208776	0.0931684	2.91109	LOC103422885; LOC103424256
GO:0006297	nucleotide-excision repair, DNA gap filling	biological_process	2	3500	5	25472	0.0208776	0.0931684	2.91109	LOC103422885; LOC103424256
GO:0060145	viral gene silencing in virus induced gene silencing	biological_process	2	3500	5	25472	0.0208776	0.0931684	2.91109	LOC103423778; LOC103451783
GO:0007263	nitric oxide mediated signal transduction	biological_process	2	3500	5	25472	0.0208776	0.0931684	2.91109	LOC103429045; LOC103439584
GO:0034432	bis(5'-adenosyl)-pentaphosphatase activity	molecular_function	2	3500	5	25472	0.0208776	0.0931684	2.91109	LOC103429098; LOC103433147
GO:0030473	nuclear migration along microtubule	biological_process	2	3500	5	25472	0.0208776	0.0931684	2.91109	LOC103430622; LOC103448669
GO:0016851	magnesium chelatase activity	molecular_function	2	3500	5	25472	0.0208776	0.0931684	2.91109	LOC103431022; LOC103456287
GO:0019305	dTDP-rhamnose biosynthetic process	biological_process	2	3500	5	25472	0.0208776	0.0931684	2.91109	LOC103432596; LOC103444758
GO:0043266	regulation of potassium ion transport	biological_process	2	3500	5	25472	0.0208776	0.0931684	2.91109	LOC103433849; LOC114819150
GO:0006116	NADH oxidation	biological_process	2	3500	5	25472	0.0208776	0.0931684	2.91109	LOC103433953; LOC103454484
GO:0047952	glycerol-3-phosphate dehydrogenase [NAD(P)+] activity	molecular_function	2	3500	5	25472	0.0208776	0.0931684	2.91109	LOC103433953; LOC103454484
GO:0006729	tetrahydrobiopterin biosynthetic process	biological_process	2	3500	5	25472	0.0208776	0.0931684	2.91109	LOC103435873; LOC103446216
GO:0080051	cutin transport	biological_process	2	3500	5	25472	0.0208776	0.0931684	2.91109	LOC103436604; LOC103444820
GO:0000448	cleavage in ITS2 between 5.8S rRNA and LSU-rRNA of tricistronic rRNA transcript (SSU-rRNA, 5.8S rRNA, LSU-rRNA)	biological_process	2	3500	5	25472	0.0208776	0.0931684	2.91109	LOC103437775; LOC114825405
GO:0050302	indole-3-acetaldehyde oxidase activity	molecular_function	2	3500	5	25472	0.0208776	0.0931684	2.91109	LOC103438505; LOC103446689
GO:0000086	G2/M transition of mitotic cell cycle	biological_process	2	3500	5	25472	0.0208776	0.0931684	2.91109	LOC103444144; LOC103444673
GO:0060148	positive regulation of posttranscriptional gene silencing	biological_process	2	3500	5	25472	0.0208776	0.0931684	2.91109	LOC103444345; LOC103451530
GO:0080038	positive regulation of cytokinin-activated signaling pathway	biological_process	2	3500	5	25472	0.0208776	0.0931684	2.91109	LOC103447978; LOC103448726
GO:0050057	linamarin synthase activity	molecular_function	2	3500	5	25472	0.0208776	0.0931684	2.91109	LOC103448827; LOC114826901
GO:0034196	acylglycerol transport	biological_process	2	3500	5	25472	0.0208776	0.0931684	2.91109	LOC103452718; LOC108174587
GO:1990052	ER to chloroplast lipid transport	biological_process	2	3500	5	25472	0.0208776	0.0931684	2.91109	LOC103452718; LOC108174587
GO:0003333	amino acid transmembrane transport	biological_process	16	3500	74	25472	0.021189	0.0938965	1.57356	LOC103404225; LOC103404664; LOC103406454; LOC103410140; LOC103411133; LOC103415003; LOC103416993; LOC103429059; LOC103429061; LOC103437650; LOC103442157; LOC103442353; LOC103445276; LOC103447221; LOC103452097; LOC114821079
GO:0020037	heme binding	molecular_function	82	3500	487	25472	0.0214053	0.0938965	1.22541	CYP707A; LOC103400467; LOC103401541; LOC103401883; LOC103402807; LOC103403867; LOC103404651; LOC103405784; LOC103405824; LOC103406468; LOC103406836; LOC103406950; LOC103408778; LOC103409417; LOC103409912; LOC103410051; LOC103410246; LOC103410357; LOC103413735; LOC103413895; LOC103418398; LOC103418775; LOC103419418; LOC103420289; LOC103420485; LOC103420971; LOC103422316; LOC103422468; LOC103422635…
GO:0004029	aldehyde dehydrogenase (NAD) activity	molecular_function	5	3500	17	25472	0.0214141	0.0938965	2.1405	LOC103401089; LOC103418162; LOC103449962; LOC103451955; LOC103452783
GO:0043878	glyceraldehyde-3-phosphate dehydrogenase (NAD+) (non-phosphorylating) activity	molecular_function	5	3500	17	25472	0.0214141	0.0938965	2.1405	LOC103401089; LOC103418162; LOC103449962; LOC103451955; LOC103452783
GO:0010598	NAD(P)H dehydrogenase complex (plastoquinone)	cellular_component	5	3500	17	25472	0.0214141	0.0938965	2.1405	LOC103405853; LOC103417828; LOC103437832; LOC103442427; LOC114821976
GO:0006833	water transport	biological_process	5	3500	17	25472	0.0214141	0.0938965	2.1405	LOC103406473; LOC103424405; LOC103427215; LOC103428693; LOC103449988
GO:0015168	glycerol transmembrane transporter activity	molecular_function	5	3500	17	25472	0.0214141	0.0938965	2.1405	LOC103406473; LOC103449824; LOC103449825; LOC103449826; SOT2
GO:0004867	serine-type endopeptidase inhibitor activity	molecular_function	5	3500	17	25472	0.0214141	0.0938965	2.1405	LOC103420967; LOC103422296; LOC103440470; LOC103440473; LOC114824033
GO:0010206	photosystem II repair	biological_process	5	3500	17	25472	0.0214141	0.0938965	2.1405	LOC103421499; LOC103432491; LOC103442354; LOC103442529; LOC103450963
GO:0035627	ceramide transport	biological_process	5	3500	17	25472	0.0214141	0.0938965	2.1405	LOC103432138; LOC103435104; LOC103435721; LOC103436532; LOC103445602
GO:0120009	intermembrane lipid transfer	biological_process	5	3500	17	25472	0.0214141	0.0938965	2.1405	LOC103432138; LOC103435104; LOC103435721; LOC103436532; LOC103445602
GO:0120013	intermembrane lipid transfer activity	molecular_function	5	3500	17	25472	0.0214141	0.0938965	2.1405	LOC103432138; LOC103435104; LOC103435721; LOC103436532; LOC103445602
GO:1902387	ceramide 1-phosphate binding	molecular_function	5	3500	17	25472	0.0214141	0.0938965	2.1405	LOC103432138; LOC103435104; LOC103435721; LOC103436532; LOC103445602
GO:1902388	ceramide 1-phosphate transporter activity	molecular_function	5	3500	17	25472	0.0214141	0.0938965	2.1405	LOC103432138; LOC103435104; LOC103435721; LOC103436532; LOC103445602
GO:0010114	response to red light	biological_process	14	3500	63	25472	0.0215565	0.0944034	1.61727	CYP707A; IAA9; LOC103401390; LOC103420118; LOC103431299; LOC103433590; LOC103437223; LOC103437302; LOC103442465; LOC103450616; LOC103450907; LOC103451069; LOC103452330; LOC103456109
GO:0032541	cortical endoplasmic reticulum	cellular_component	11	3500	47	25472	0.0224016	0.0979828	1.70329	LOC103407821; LOC103423842; LOC103432947; LOC103432948; LOC103432951; LOC103438083; LOC103450221; LOC103455179; LOC114821783; LOC114824722; LOC114826128
GO:0009097	isoleucine biosynthetic process	biological_process	6	3500	22	25472	0.0238429	0.104157	1.98483	LOC103405563; LOC103412455; LOC103431826; LOC103436029; LOC103445182; LOC114822481
GO:1902326	positive regulation of chlorophyll biosynthetic process	biological_process	4	3500	13	25472	0.0241328	0.104516	2.2393	GATA5; LOC103424902; LOC103436965; LOC103456109
GO:0009969	xyloglucan biosynthetic process	biological_process	4	3500	13	25472	0.0241328	0.104516	2.2393	LOC103409147; LOC103422213; LOC103430782; LOC103439678
GO:0003954	NADH dehydrogenase activity	molecular_function	4	3500	13	25472	0.0241328	0.104516	2.2393	LOC103411989; LOC103419668; LOC103438108; LOC108173107
GO:0016165	linoleate 13S-lipoxygenase activity	molecular_function	4	3500	13	25472	0.0241328	0.104516	2.2393	LOC103416677; LOC103438366; LOC103453627; LOC114825931
GO:0003939	L-iditol 2-dehydrogenase activity	molecular_function	4	3500	13	25472	0.0241328	0.104516	2.2393	LOC103431148; LOC103439703; LOC103439704; LOC103440086
GO:0009854	oxidative photosynthetic carbon pathway	biological_process	4	3500	13	25472	0.0241328	0.104516	2.2393	LOC103435003; LOC103439098; LOC103439114; LOC103443798
GO:0006820	anion transport	biological_process	4	3500	13	25472	0.0241328	0.104516	2.2393	LOC103440894; LOC103444902; LOC103450923; LOC103455790
GO:0016117	carotenoid biosynthetic process	biological_process	9	3500	37	25472	0.0243473	0.105316	1.77025	LOC103405286; LOC103406562; LOC103410975; LOC103415087; LOC103426193; LOC103440874; LOC103441970; LOC103448109; LOC103454736
GO:0006730	one-carbon metabolic process	biological_process	8	3500	32	25472	0.0248666	0.106525	1.81943	LOC103405877; LOC103425187; LOC103426242; LOC103443414; LOC103444473; LOC103450000; LOC103452632; LOC103452744
GO:0030170	pyridoxal phosphate binding	molecular_function	25	3500	128	25472	0.0251443	0.106525	1.42143	LOC103401762; LOC103403054; LOC103405636; LOC103405859; LOC103405877; LOC103406500; LOC103413454; LOC103414844; LOC103416410; LOC103418473; LOC103420771; LOC103430893; LOC103431625; LOC103431906; LOC103432083; LOC103440026; LOC103443414; LOC103446887; LOC103448310; LOC103448720; LOC103450660; LOC103450777; LOC103452013; LOC103452551; LOC114825422
GO:0010424	DNA methylation on cytosine within a CG sequence	biological_process	3	3500	9	25472	0.0252319	0.106525	2.4259	LOC103409483; LOC103412678; LOC103425030
GO:0019430	removal of superoxide radicals	biological_process	3	3500	9	25472	0.0252319	0.106525	2.4259	LOC103411276; LOC103421948; LOC114823685
GO:0043562	cellular response to nitrogen levels	biological_process	3	3500	9	25472	0.0252319	0.106525	2.4259	LOC103411989; LOC103438108; LOC114823959
GO:0005337	nucleoside transmembrane transporter activity	molecular_function	3	3500	9	25472	0.0252319	0.106525	2.4259	LOC103412448; LOC103413722; LOC103434665
GO:0006694	steroid biosynthetic process	biological_process	3	3500	9	25472	0.0252319	0.106525	2.4259	LOC103416663; LOC103431105; LOC103442495
GO:0016655	oxidoreductase activity, acting on NAD(P)H, quinone or similar compound as acceptor	molecular_function	3	3500	9	25472	0.0252319	0.106525	2.4259	LOC103417828; LOC103430843; LOC114821976
GO:0010196	nonphotochemical quenching	biological_process	3	3500	9	25472	0.0252319	0.106525	2.4259	LOC103420118; LOC103446212; LOC103450849
GO:0006206	pyrimidine nucleobase metabolic process	biological_process	3	3500	9	25472	0.0252319	0.106525	2.4259	LOC103420689; LOC103420774; LOC103433427
GO:0008252	nucleotidase activity	molecular_function	3	3500	9	25472	0.0252319	0.106525	2.4259	LOC103420689; LOC103420774; LOC103433427
GO:0008253	5'-nucleotidase activity	molecular_function	3	3500	9	25472	0.0252319	0.106525	2.4259	LOC103420689; LOC103420774; LOC103433427
GO:0009166	nucleotide catabolic process	biological_process	3	3500	9	25472	0.0252319	0.106525	2.4259	LOC103420689; LOC103420774; LOC103433427
GO:0045174	glutathione dehydrogenase (ascorbate) activity	molecular_function	3	3500	9	25472	0.0252319	0.106525	2.4259	LOC103422275; LOC103427921; LOC108171274
GO:0000427	plastid-encoded plastid RNA polymerase complex	cellular_component	3	3500	9	25472	0.0252319	0.106525	2.4259	LOC103425493; LOC103444030; LOC103445979
GO:0042646	plastid nucleoid	cellular_component	3	3500	9	25472	0.0252319	0.106525	2.4259	LOC103425493; LOC103451457; LOC103452780
GO:0004365	glyceraldehyde-3-phosphate dehydrogenase (NAD+) (phosphorylating) activity	molecular_function	3	3500	9	25472	0.0252319	0.106525	2.4259	LOC103425757; LOC103442070; LOC114825363
GO:0016051	carbohydrate biosynthetic process	biological_process	3	3500	9	25472	0.0252319	0.106525	2.4259	LOC103435411; LOC103439109; LOC103439933
GO:0052543	callose deposition in cell wall	biological_process	3	3500	9	25472	0.0252319	0.106525	2.4259	LOC103437459; LOC103449565; LOC114819137
GO:0009861	jasmonic acid and ethylene-dependent systemic resistance	biological_process	3	3500	9	25472	0.0252319	0.106525	2.4259	LOC103442791; LOC114821175; LOC114825669
GO:0005887	integral component of plasma membrane	cellular_component	39	3500	214	25472	0.0255048	0.107548	1.32631	LOC103401649; LOC103402020; LOC103402654; LOC103402655; LOC103403007; LOC103404717; LOC103405311; LOC103407259; LOC103410295; LOC103414170; LOC103417198; LOC103419824; LOC103421003; LOC103421347; LOC103421939; LOC103422077; LOC103422718; LOC103423566; LOC103426288; LOC103427530; LOC103429767; LOC103432469; LOC103434230; LOC103439917; LOC103443052; LOC103443251; LOC103444121; LOC103444305; LOC1034…
GO:0005764	lysosome	cellular_component	11	3500	48	25472	0.0262445	0.110535	1.66781	LOC103400276; LOC103400937; LOC103405696; LOC103407787; LOC103414835; LOC103421060; LOC103433689; LOC103433690; LOC103451125; LOC103453996; LOC114819456
GO:0009536	plastid	cellular_component	55	3500	316	25472	0.0264189	0.111136	1.26669	LOC103400054; LOC103400239; LOC103400502; LOC103402171; LOC103404467; LOC103404777; LOC103405038; LOC103405877; LOC103410246; LOC103411114; LOC103411985; LOC103411989; LOC103412093; LOC103413146; LOC103415235; LOC103417777; LOC103418927; LOC103422687; LOC103423796; LOC103424451; LOC103424884; LOC103426140; LOC103427372; LOC103427480; LOC103429613; LOC103432575; LOC103435169; LOC103435174; LOC1034…
GO:0050897	cobalt ion binding	molecular_function	14	3500	65	25472	0.0281413	0.118241	1.56751	LOC103400130; LOC103401698; LOC103404467; LOC103405877; LOC103413684; LOC103417731; LOC103426874; LOC103437370; LOC103438445; LOC103443414; LOC103449463; LOC103452065; LOC103453876; LOC114824344
GO:0016998	cell wall macromolecule catabolic process	biological_process	5	3500	18	25472	0.0284724	0.119205	2.02159	LOC103400659; LOC103417569; LOC103449997; LOC103453829; LOC114824321
GO:0007140	male meiotic nuclear division	biological_process	5	3500	18	25472	0.0284724	0.119205	2.02159	LOC103402760; LOC103422197; LOC103433335; LOC103435979; LOC103451506
GO:0002213	defense response to insect	biological_process	5	3500	18	25472	0.0284724	0.119205	2.02159	LOC103405103; LOC103408145; LOC103421585; LOC103421684; LOC103449224
GO:0047262	polygalacturonate 4-alpha-galacturonosyltransferase activity	molecular_function	9	3500	38	25472	0.0290941	0.121663	1.72367	LOC103401242; LOC103402973; LOC103405188; LOC103416982; LOC103435689; LOC103437913; LOC103442300; LOC103445261; LOC103449230
GO:0006855	drug transmembrane transport	biological_process	15	3500	71	25472	0.0294178	0.122871	1.53755	LOC103402630; LOC103403071; LOC103405169; LOC103410500; LOC103415446; LOC103416028; LOC103416598; LOC103428479; LOC103441751; LOC103442922; LOC103443008; LOC103446715; LOC103448048; LOC103449273; LOC114821660
GO:0006817	phosphate ion transport	biological_process	8	3500	33	25472	0.0301441	0.125755	1.76429	LOC103412500; LOC103419864; LOC103420592; LOC103428150; LOC103446294; LOC103446408; LOC103450661; LOC103452324
GO:0007062	sister chromatid cohesion	biological_process	6	3500	23	25472	0.0303157	0.126023	1.89853	LOC103404218; LOC103406461; LOC103425575; LOC103432923; LOC103433704; LOC103438345
GO:0005381	iron ion transmembrane transporter activity	molecular_function	6	3500	23	25472	0.0303157	0.126023	1.89853	LOC103422025; LOC103433684; LOC103441751; LOC103444589; LOC103450852; LOC114824740
GO:0016311	dephosphorylation	biological_process	6	3500	23	25472	0.0303157	0.126023	1.89853	LOC103424563; LOC103430260; LOC103437743; LOC103446461; LOC103451169; LOC114820656
GO:0009741	response to brassinosteroid	biological_process	11	3500	49	25472	0.0305459	0.12683	1.63377	LOC103401541; LOC103409272; LOC103420971; LOC103429613; LOC103437685; LOC103440490; LOC103440492; LOC103440744; LOC103448808; LOC114821569; LOC114821831
GO:0048831	regulation of shoot system development	biological_process	7	3500	28	25472	0.0306724	0.127206	1.81943	LOC103402202; LOC103404881; LOC103416597; LOC103417162; LOC103422017; LOC103451518; LOC103452562
GO:0009637	response to blue light	biological_process	15	3500	72	25472	0.033157	0.136839	1.51619	LOC103404434; LOC103405234; LOC103405794; LOC103412999; LOC103420118; LOC103426545; LOC103428062; LOC103433590; LOC103433937; LOC103437223; LOC103440396; LOC103442343; LOC103450616; LOC103451069; LOC103456109
GO:1901409	positive regulation of phosphorylation of RNA polymerase II C-terminal domain	biological_process	4	3500	14	25472	0.0333838	0.136839	2.07935	LOC103413641; LOC103433937; LOC103435871; LOC103445887
GO:0050777	negative regulation of immune response	biological_process	4	3500	14	25472	0.0333838	0.136839	2.07935	LOC103414497; LOC103447717; LOC103454945; LOC103455896
GO:0048509	regulation of meristem development	biological_process	4	3500	14	25472	0.0333838	0.136839	2.07935	LOC103416597; LOC103422017; LOC103448726; LOC103451518
GO:0030007	cellular potassium ion homeostasis	biological_process	4	3500	14	25472	0.0333838	0.136839	2.07935	LOC103417881; LOC103427530; LOC103439871; LOC103448634
GO:0005365	myo-inositol transmembrane transporter activity	molecular_function	4	3500	14	25472	0.0333838	0.136839	2.07935	LOC103449824; LOC103449825; LOC103449826; SOT2
GO:0015148	D-xylose transmembrane transporter activity	molecular_function	4	3500	14	25472	0.0333838	0.136839	2.07935	LOC103449824; LOC103449825; LOC103449826; SOT2
GO:0015575	mannitol transmembrane transporter activity	molecular_function	4	3500	14	25472	0.0333838	0.136839	2.07935	LOC103449824; LOC103449825; LOC103449826; SOT2
GO:0015576	sorbitol transmembrane transporter activity	molecular_function	4	3500	14	25472	0.0333838	0.136839	2.07935	LOC103449824; LOC103449825; LOC103449826; SOT2
GO:0015591	D-ribose transmembrane transporter activity	molecular_function	4	3500	14	25472	0.0333838	0.136839	2.07935	LOC103449824; LOC103449825; LOC103449826; SOT2
GO:0016413	O-acetyltransferase activity	molecular_function	16	3500	78	25472	0.034109	0.139487	1.49286	LOC103402984; LOC103404690; LOC103405529; LOC103406610; LOC103409265; LOC103417327; LOC103419127; LOC103421548; LOC103428502; LOC103434866; LOC103437220; LOC103439667; LOC103442277; LOC103451937; LOC103454620; LOC108173383
GO:0015171	amino acid transmembrane transporter activity	molecular_function	16	3500	78	25472	0.034109	0.139487	1.49286	LOC103404225; LOC103404664; LOC103406454; LOC103410140; LOC103411133; LOC103415003; LOC103416993; LOC103429059; LOC103429061; LOC103437650; LOC103442157; LOC103442353; LOC103445276; LOC103447221; LOC103452097; LOC114821079
GO:0070417	cellular response to cold	biological_process	9	3500	39	25472	0.0344605	0.14076	1.67947	LOC103413741; LOC103415736; LOC103416597; LOC103417767; LOC103424916; LOC103426927; LOC103447141; LOC103451980; LOC114825962
GO:0016874	ligase activity	molecular_function	11	3500	50	25472	0.0353315	0.141895	1.6011	LOC103408282; LOC103415175; LOC103424648; LOC103429287; LOC103436425; LOC103443401; LOC103446408; LOC103450322; LOC103455025; LOC103455723; LOC114820977
GO:0006189	'de novo' IMP biosynthetic process	biological_process	5	3500	19	25472	0.0369039	0.141895	1.91519	LOC103400609; LOC103401954; LOC103421320; LOC103441651; LOC103454139
GO:0015116	sulfate transmembrane transporter activity	molecular_function	5	3500	19	25472	0.0369039	0.141895	1.91519	LOC103401023; LOC103402588; LOC103434544; LOC103449341; LOC103451572
GO:0034485	phosphatidylinositol-3,4,5-trisphosphate 5-phosphatase activity	molecular_function	5	3500	19	25472	0.0369039	0.141895	1.91519	LOC103407314; LOC103424617; LOC103438651; LOC103442305; LOC103448973
GO:0016829	lyase activity	molecular_function	5	3500	19	25472	0.0369039	0.141895	1.91519	LOC103413017; LOC103425492; LOC103429993; LOC103440026; LOC103450813
GO:0006268	DNA unwinding involved in DNA replication	biological_process	5	3500	19	25472	0.0369039	0.141895	1.91519	LOC103415561; LOC103423906; LOC103445965; LOC103451788; LOC108174052
GO:0080142	regulation of salicylic acid biosynthetic process	biological_process	5	3500	19	25472	0.0369039	0.141895	1.91519	LOC103420911; LOC103423645; LOC103446473; LOC103447190; LOC114823246
GO:0006790	sulfur compound metabolic process	biological_process	5	3500	19	25472	0.0369039	0.141895	1.91519	LOC103430260; LOC103436413; LOC103446461; LOC108174913; LOC114819943
GO:0008483	transaminase activity	molecular_function	7	3500	29	25472	0.0374121	0.141895	1.75669	LOC103406500; LOC103414844; LOC103420771; LOC103425807; LOC103434690; LOC103448895; LOC114821228
GO:0010295	(+)-abscisic acid 8'-hydroxylase activity	molecular_function	2	3500	6	25472	0.0375216	0.141895	2.4259	CYP707A; LOC103455974
GO:0005930	axoneme	cellular_component	2	3500	6	25472	0.0375216	0.141895	2.4259	LOC103400446; LOC103426601
GO:0044458	motile cilium assembly	biological_process	2	3500	6	25472	0.0375216	0.141895	2.4259	LOC103400446; LOC103426601
GO:0097014	ciliary plasm	cellular_component	2	3500	6	25472	0.0375216	0.141895	2.4259	LOC103400446; LOC103426601
GO:0005753	mitochondrial proton-transporting ATP synthase complex	cellular_component	2	3500	6	25472	0.0375216	0.141895	2.4259	LOC103401698; LOC103443236
GO:0019464	glycine decarboxylation via glycine cleavage system	biological_process	2	3500	6	25472	0.0375216	0.141895	2.4259	LOC103402356; LOC103409716
GO:0050362	L-tryptophan:2-oxoglutarate aminotransferase activity	molecular_function	2	3500	6	25472	0.0375216	0.141895	2.4259	LOC103403054; LOC103452013
GO:0004316	3-oxoacyl-[acyl-carrier-protein] reductase (NADPH) activity	molecular_function	2	3500	6	25472	0.0375216	0.141895	2.4259	LOC103403122; LOC103403493
GO:0102131	3-oxo-glutaryl-[acp] methyl ester reductase activity	molecular_function	2	3500	6	25472	0.0375216	0.141895	2.4259	LOC103403122; LOC103403493
GO:0102132	3-oxo-pimeloyl-[acp] methyl ester reductase activity	molecular_function	2	3500	6	25472	0.0375216	0.141895	2.4259	LOC103403122; LOC103403493
GO:0009311	oligosaccharide metabolic process	biological_process	2	3500	6	25472	0.0375216	0.141895	2.4259	LOC103403150; LOC103431926
GO:0008081	phosphoric diester hydrolase activity	molecular_function	2	3500	6	25472	0.0375216	0.141895	2.4259	LOC103404649; LOC103442441
GO:0052691	UDP-arabinopyranose mutase activity	molecular_function	2	3500	6	25472	0.0375216	0.141895	2.4259	LOC103404652; LOC103437908
GO:0051455	attachment of spindle microtubules to kinetochore involved in homologous chromosome segregation	biological_process	2	3500	6	25472	0.0375216	0.141895	2.4259	LOC103405517; LOC103433704
GO:1990879	CST complex	cellular_component	2	3500	6	25472	0.0375216	0.141895	2.4259	LOC103408530; LOC103450885
GO:0042353	fucose biosynthetic process	biological_process	2	3500	6	25472	0.0375216	0.141895	2.4259	LOC103409147; LOC103422213
GO:0005828	kinetochore microtubule	cellular_component	2	3500	6	25472	0.0375216	0.141895	2.4259	LOC103411867; LOC103436676
GO:0043693	monoterpene biosynthetic process	biological_process	2	3500	6	25472	0.0375216	0.141895	2.4259	LOC103412119; LOC103455922
GO:0010270	photosystem II oxygen evolving complex assembly	biological_process	2	3500	6	25472	0.0375216	0.141895	2.4259	LOC103412182; LOC103449136
GO:0009643	photosynthetic acclimation	biological_process	2	3500	6	25472	0.0375216	0.141895	2.4259	LOC103413454; LOC103451676
GO:0009865	pollen tube adhesion	biological_process	2	3500	6	25472	0.0375216	0.141895	2.4259	LOC103417234; LOC103423926
GO:0005513	detection of calcium ion	biological_process	2	3500	6	25472	0.0375216	0.141895	2.4259	LOC103417881; LOC103439871
GO:0004435	phosphatidylinositol phospholipase C activity	molecular_function	2	3500	6	25472	0.0375216	0.141895	2.4259	LOC103418706; LOC103437320
GO:0009330	DNA topoisomerase complex (ATP-hydrolyzing)	cellular_component	2	3500	6	25472	0.0375216	0.141895	2.4259	LOC103419314; LOC103439980
GO:0009531	secondary cell wall	cellular_component	2	3500	6	25472	0.0375216	0.141895	2.4259	LOC103421465; LOC103433516
GO:0008173	RNA methyltransferase activity	molecular_function	2	3500	6	25472	0.0375216	0.141895	2.4259	LOC103422322; LOC103422833
GO:0000795	synaptonemal complex	cellular_component	2	3500	6	25472	0.0375216	0.141895	2.4259	LOC103422994; LOC103433046
GO:0000077	DNA damage checkpoint	biological_process	2	3500	6	25472	0.0375216	0.141895	2.4259	LOC103425438; LOC114826890
GO:0008278	cohesin complex	cellular_component	2	3500	6	25472	0.0375216	0.141895	2.4259	LOC103425575; LOC103433704
GO:0010330	cellulose synthase complex	cellular_component	2	3500	6	25472	0.0375216	0.141895	2.4259	LOC103426557; LOC103456364
GO:0046577	long-chain-alcohol oxidase activity	molecular_function	2	3500	6	25472	0.0375216	0.141895	2.4259	LOC103428007; LOC103445660
GO:0051292	nuclear pore complex assembly	biological_process	2	3500	6	25472	0.0375216	0.141895	2.4259	LOC103430622; LOC103448669
GO:0005976	polysaccharide metabolic process	biological_process	2	3500	6	25472	0.0375216	0.141895	2.4259	LOC103431726; LOC103441803
GO:0030775	glucuronoxylan 4-O-methyltransferase activity	molecular_function	2	3500	6	25472	0.0375216	0.141895	2.4259	LOC103431726; LOC103441803
GO:0008184	glycogen phosphorylase activity	molecular_function	2	3500	6	25472	0.0375216	0.141895	2.4259	LOC103431906; LOC103432083
GO:0102250	linear malto-oligosaccharide phosphorylase activity	molecular_function	2	3500	6	25472	0.0375216	0.141895	2.4259	LOC103431906; LOC103432083
GO:0102499	SHG alpha-glucan phosphorylase activity	molecular_function	2	3500	6	25472	0.0375216	0.141895	2.4259	LOC103431906; LOC103432083
GO:0048657	anther wall tapetum cell differentiation	biological_process	2	3500	6	25472	0.0375216	0.141895	2.4259	LOC103432823; LOC103437230
GO:0051938	L-glutamate import	biological_process	2	3500	6	25472	0.0375216	0.141895	2.4259	LOC103435609; LOC103435611
GO:0042754	negative regulation of circadian rhythm	biological_process	2	3500	6	25472	0.0375216	0.141895	2.4259	LOC103436695; LOC114823694
GO:0004809	tRNA (guanine-N2-)-methyltransferase activity	molecular_function	2	3500	6	25472	0.0375216	0.141895	2.4259	LOC103438303; LOC103438311
GO:0010597	green leaf volatile biosynthetic process	biological_process	2	3500	6	25472	0.0375216	0.141895	2.4259	LOC103438366; LOC114825931
GO:1903461	Okazaki fragment processing involved in mitotic DNA replication	biological_process	2	3500	6	25472	0.0375216	0.141895	2.4259	LOC103438958; LOC103455456
GO:0015914	phospholipid transport	biological_process	2	3500	6	25472	0.0375216	0.141895	2.4259	LOC103444583; LOC103447135
GO:0005775	vacuolar lumen	cellular_component	2	3500	6	25472	0.0375216	0.141895	2.4259	LOC103445495; LOC114819562
GO:0003861	3-isopropylmalate dehydratase activity	molecular_function	2	3500	6	25472	0.0375216	0.141895	2.4259	LOC108169884; LOC114820704
GO:0016125	sterol metabolic process	biological_process	12	3500	56	25472	0.0375507	0.141895	1.55951	CYP707A; LOC103401541; LOC103409417; LOC103422316; LOC103428639; LOC103432823; LOC103437230; LOC103440454; LOC103443518; LOC103445207; LOC103453334; LOC103455974
GO:0001653	peptide receptor activity	molecular_function	3	3500	10	25472	0.0375592	0.141895	2.18331	LOC103402202; LOC103436247; LOC103445171
GO:0009533	chloroplast stromal thylakoid	cellular_component	3	3500	10	25472	0.0375592	0.141895	2.18331	LOC103403404; LOC103432491; LOC103446212
GO:0090691	formation of plant organ boundary	biological_process	3	3500	10	25472	0.0375592	0.141895	2.18331	LOC103404434; LOC103405234; LOC103442343
GO:0007338	single fertilization	biological_process	3	3500	10	25472	0.0375592	0.141895	2.18331	LOC103405311; LOC103443251; LOC103453928
GO:0070182	DNA polymerase binding	molecular_function	3	3500	10	25472	0.0375592	0.141895	2.18331	LOC103405483; LOC103435744; LOC114822098
GO:0018026	peptidyl-lysine monomethylation	biological_process	3	3500	10	25472	0.0375592	0.141895	2.18331	LOC103406296; LOC103435718; LOC103445979
GO:0015204	urea transmembrane transporter activity	molecular_function	3	3500	10	25472	0.0375592	0.141895	2.18331	LOC103406473; LOC103429984; LOC103449988
GO:0005242	inward rectifier potassium channel activity	molecular_function	3	3500	10	25472	0.0375592	0.141895	2.18331	LOC103415754; LOC103429045; LOC103439584
GO:0019897	extrinsic component of plasma membrane	cellular_component	3	3500	10	25472	0.0375592	0.141895	2.18331	LOC103415886; LOC103425103; LOC103445790
GO:0004165	dodecenoyl-CoA delta-isomerase activity	molecular_function	3	3500	10	25472	0.0375592	0.141895	2.18331	LOC103418149; LOC103434903; LOC103452890
GO:0006013	mannose metabolic process	biological_process	3	3500	10	25472	0.0375592	0.141895	2.18331	LOC103418267; LOC103418287; LOC103430729
GO:0006166	purine ribonucleoside salvage	biological_process	3	3500	10	25472	0.0375592	0.141895	2.18331	LOC103428644; LOC103444025; LOC103456217
GO:0009807	lignan biosynthetic process	biological_process	3	3500	10	25472	0.0375592	0.141895	2.18331	LOC103440390; LOC103440471; LOC114820167
GO:0042407	cristae formation	biological_process	3	3500	10	25472	0.0375592	0.141895	2.18331	LOC103445872; LOC108169256; LOC108169277
GO:0009641	shade avoidance	biological_process	6	3500	24	25472	0.037871	0.142747	1.81943	LOC103403054; LOC103427511; LOC103430626; LOC103442188; LOC103451559; LOC103452013
GO:0004439	phosphatidylinositol-4,5-bisphosphate 5-phosphatase activity	molecular_function	6	3500	24	25472	0.037871	0.142747	1.81943	LOC103407314; LOC103424617; LOC103438651; LOC103442305; LOC103448973; LOC103449848
GO:0043622	cortical microtubule organization	biological_process	10	3500	45	25472	0.0379063	0.142747	1.61727	LOC103404638; LOC103415297; LOC103433737; LOC103437900; LOC103446184; LOC108174105; LOC114820570; LOC114821175; LOC114825668; LOC114825669
GO:0071949	FAD binding	molecular_function	17	3500	86	25472	0.0428975	0.155877	1.43862	LOC103401379; LOC103412527; LOC103433070; LOC103436975; LOC103438473; LOC103438505; LOC103440288; LOC103440793; LOC103440876; LOC103441948; LOC103448566; LOC103448568; LOC103455003; LOC108172967; LOC114821119; LOC114824986; LOC114827520
GO:0009625	response to insect	biological_process	8	3500	35	25472	0.0429353	0.155877	1.66348	LOC103413400; LOC103434452; LOC103434454; LOC103434894; LOC103435265; LOC103444893; LOC103445764; LOC103450771
GO:0010218	response to far red light	biological_process	13	3500	63	25472	0.0443637	0.155877	1.50175	IAA9; LOC103404434; LOC103405234; LOC103406741; LOC103420118; LOC103427511; LOC103433590; LOC103437223; LOC103442343; LOC103450616; LOC103450907; LOC103451069; LOC103452330
GO:0008271	secondary active sulfate transmembrane transporter activity	molecular_function	4	3500	15	25472	0.0445571	0.155877	1.94072	LOC103401023; LOC103402588; LOC103434544; LOC103451572
GO:0009088	threonine biosynthetic process	biological_process	4	3500	15	25472	0.0445571	0.155877	1.94072	LOC103401762; LOC103422185; LOC103425766; LOC103450777
GO:0010069	zygote asymmetric cytokinesis in embryo sac	biological_process	4	3500	15	25472	0.0445571	0.155877	1.94072	LOC103412678; LOC103413017; LOC103422685; LOC103429993
GO:0009901	anther dehiscence	biological_process	4	3500	15	25472	0.0445571	0.155877	1.94072	LOC103414170; LOC103434230; LOC103441882; LOC103443933
GO:0006596	polyamine biosynthetic process	biological_process	4	3500	15	25472	0.0445571	0.155877	1.94072	LOC103420360; LOC103422167; LOC103440896; LOC103455791
GO:0008381	mechanosensitive ion channel activity	molecular_function	4	3500	15	25472	0.0445571	0.155877	1.94072	LOC103440894; LOC103444902; LOC103450923; LOC103455790
GO:0004602	glutathione peroxidase activity	molecular_function	4	3500	15	25472	0.0445571	0.155877	1.94072	LOC103446626; LOC103446628; LOC103454744; LOC103454745
GO:0010030	positive regulation of seed germination	biological_process	7	3500	30	25472	0.0450769	0.155877	1.69813	LOC103404093; LOC103422599; LOC103426549; LOC103443860; LOC103445962; LOC114820509; LOC114824077
GO:0004568	chitinase activity	molecular_function	7	3500	30	25472	0.0450769	0.155877	1.69813	LOC103409997; LOC103410311; LOC103422527; LOC103426493; LOC103443344; LOC103443354; LOC103455189
GO:0051289	protein homotetramerization	biological_process	6	3500	25	25472	0.0465619	0.155877	1.74665	LOC103404780; LOC103416876; LOC103437431; LOC103442764; LOC103452551; LOC114820167
GO:0042162	telomeric DNA binding	molecular_function	6	3500	25	25472	0.0465619	0.155877	1.74665	LOC103408530; LOC103427581; LOC103438243; LOC103450885; LOC103451857; LOC108174052
GO:0004089	carbonate dehydratase activity	molecular_function	6	3500	25	25472	0.0465619	0.155877	1.74665	LOC103410911; LOC103421479; LOC103424366; LOC103425818; LOC103450460; LOC103451971
GO:0006814	sodium ion transport	biological_process	6	3500	25	25472	0.0465619	0.155877	1.74665	LOC103418927; LOC103422380; LOC103422687; LOC103429760; LOC103450143; LOC103451334
GO:0010216	maintenance of DNA methylation	biological_process	5	3500	20	25472	0.0467759	0.155877	1.81943	LOC103409483; LOC103412678; LOC103425030; LOC103433171; LOC103446074
GO:0005179	hormone activity	molecular_function	5	3500	20	25472	0.0467759	0.155877	1.81943	LOC103416593; LOC103422484; LOC103423988; LOC103455119; LOC114819262
GO:0009299	mRNA transcription	biological_process	5	3500	20	25472	0.0467759	0.155877	1.81943	LOC103419892; LOC103422375; LOC103445622; LOC103451069; LOC114824980
GO:0009231	riboflavin biosynthetic process	biological_process	5	3500	20	25472	0.0467759	0.155877	1.81943	LOC103427171; LOC103432227; LOC103451152; LOC103451442; LOC114822642
GO:0005315	inorganic phosphate transmembrane transporter activity	molecular_function	9	3500	41	25472	0.0471801	0.155877	1.59755	LOC103400054; LOC103405038; LOC103418927; LOC103419864; LOC103422687; LOC103441956; LOC103446294; LOC103447595; LOC103450661
GO:0009416	response to light stimulus	biological_process	32	3500	180	25472	0.0497909	0.155877	1.29382	GATA5; LOC103402598; LOC103403779; LOC103405098; LOC103405584; LOC103409996; LOC103413400; LOC103415388; LOC103418927; LOC103419710; LOC103419892; LOC103420118; LOC103422375; LOC103422687; LOC103424934; LOC103429202; LOC103429652; LOC103433590; LOC103434746; LOC103434978; LOC103437223; LOC103444030; LOC103445622; LOC103445979; LOC103446447; LOC103450616; LOC103451069; LOC103451145; LOC103452146; …
GO:0004869	cysteine-type endopeptidase inhibitor activity	molecular_function	8	3500	36	25472	0.0505191	0.155877	1.61727	LOC103400616; LOC103408753; LOC103420967; LOC103422296; LOC103434432; LOC103440470; LOC103440473; LOC114824033
GO:0006468	protein phosphorylation	biological_process	44	3500	257	25472	0.0505893	0.155877	1.24599	LOC103400515; LOC103401725; LOC103402025; LOC103403793; LOC103403966; LOC103404104; LOC103405015; LOC103405578; LOC103407240; LOC103412083; LOC103412774; LOC103412999; LOC103414252; LOC103415989; LOC103416274; LOC103418865; LOC103420206; LOC103422017; LOC103428062; LOC103429472; LOC103429688; LOC103431290; LOC103431650; LOC103433750; LOC103435169; LOC103435535; LOC103435899; LOC103436189; LOC1034…
GO:0033788	leucoanthocyanidin reductase activity	molecular_function	1	3500	3	25472	0.0514424	0.155877	2.4259	LAR1
GO:0010212	response to ionizing radiation	biological_process	1	3500	3	25472	0.0514424	0.155877	2.4259	LOC103400744
GO:0015228	coenzyme A transmembrane transporter activity	molecular_function	1	3500	3	25472	0.0514424	0.155877	2.4259	LOC103400789
GO:1990559	mitochondrial coenzyme A transmembrane transport	biological_process	1	3500	3	25472	0.0514424	0.155877	2.4259	LOC103400789
GO:0006971	hypotonic response	biological_process	1	3500	3	25472	0.0514424	0.155877	2.4259	LOC103401207
GO:2000693	positive regulation of seed maturation	biological_process	1	3500	3	25472	0.0514424	0.155877	2.4259	LOC103401207
GO:0032504	multicellular organism reproduction	biological_process	1	3500	3	25472	0.0514424	0.155877	2.4259	LOC103401242
GO:0010363	regulation of plant-type hypersensitive response	biological_process	1	3500	3	25472	0.0514424	0.155877	2.4259	LOC103401375
GO:0035511	oxidative DNA demethylation	biological_process	1	3500	3	25472	0.0514424	0.155877	2.4259	LOC103401654
GO:0035514	DNA demethylase activity	molecular_function	1	3500	3	25472	0.0514424	0.155877	2.4259	LOC103401654
GO:0043734	DNA-N1-methyladenine dioxygenase activity	molecular_function	1	3500	3	25472	0.0514424	0.155877	2.4259	LOC103401654
GO:0051747	cytosine C-5 DNA demethylase activity	molecular_function	1	3500	3	25472	0.0514424	0.155877	2.4259	LOC103401654
GO:0103053	1-ethyladenine demethylase activity	molecular_function	1	3500	3	25472	0.0514424	0.155877	2.4259	LOC103401654
GO:1900109	regulation of histone H3-K9 dimethylation	biological_process	1	3500	3	25472	0.0514424	0.155877	2.4259	LOC103402019
GO:0005731	nucleolus organizer region	cellular_component	1	3500	3	25472	0.0514424	0.155877	2.4259	LOC103402760
GO:0010342	endosperm cellularization	biological_process	1	3500	3	25472	0.0514424	0.155877	2.4259	LOC103403793
GO:0010028	xanthophyll cycle	biological_process	1	3500	3	25472	0.0514424	0.155877	2.4259	LOC103405038
GO:0015229	L-ascorbic acid transmembrane transporter activity	molecular_function	1	3500	3	25472	0.0514424	0.155877	2.4259	LOC103405038
GO:0015882	L-ascorbic acid transmembrane transport	biological_process	1	3500	3	25472	0.0514424	0.155877	2.4259	LOC103405038
GO:0000127	transcription factor TFIIIC complex	cellular_component	1	3500	3	25472	0.0514424	0.155877	2.4259	LOC103405186
GO:0031462	Cul2-RING ubiquitin ligase complex	cellular_component	1	3500	3	25472	0.0514424	0.155877	2.4259	LOC103405253
GO:0031467	Cul7-RING ubiquitin ligase complex	cellular_component	1	3500	3	25472	0.0514424	0.155877	2.4259	LOC103405253
GO:0019237	centromeric DNA binding	molecular_function	1	3500	3	25472	0.0514424	0.155877	2.4259	LOC103405517
GO:0007060	male meiosis chromosome segregation	biological_process	1	3500	3	25472	0.0514424	0.155877	2.4259	LOC103405828
GO:0018023	peptidyl-lysine trimethylation	biological_process	1	3500	3	25472	0.0514424	0.155877	2.4259	LOC103406296
GO:0006004	fucose metabolic process	biological_process	1	3500	3	25472	0.0514424	0.155877	2.4259	LOC103407787
GO:0019008	molybdopterin synthase complex	cellular_component	1	3500	3	25472	0.0514424	0.155877	2.4259	LOC103407849
GO:0046915	transition metal ion transmembrane transporter activity	molecular_function	1	3500	3	25472	0.0514424	0.155877	2.4259	LOC103408740
GO:1990388	xylem-to-phloem iron transport	biological_process	1	3500	3	25472	0.0514424	0.155877	2.4259	LOC103408740
GO:0102241	soyasaponin III rhamnosyltransferase activity	molecular_function	1	3500	3	25472	0.0514424	0.155877	2.4259	LOC103409460
GO:0032467	positive regulation of cytokinesis	biological_process	1	3500	3	25472	0.0514424	0.155877	2.4259	LOC103411867
GO:2000694	regulation of phragmoplast microtubule organization	biological_process	1	3500	3	25472	0.0514424	0.155877	2.4259	LOC103411867
GO:0052834	inositol monophosphate phosphatase activity	molecular_function	1	3500	3	25472	0.0514424	0.155877	2.4259	LOC103412081
GO:0005948	acetolactate synthase complex	cellular_component	1	3500	3	25472	0.0514424	0.155877	2.4259	LOC103412455
GO:0006551	leucine metabolic process	biological_process	1	3500	3	25472	0.0514424	0.155877	2.4259	LOC103412455
GO:0031390	Ctf18 RFC-like complex	cellular_component	1	3500	3	25472	0.0514424	0.155877	2.4259	LOC103412575
GO:2000232	regulation of rRNA processing	biological_process	1	3500	3	25472	0.0514424	0.155877	2.4259	LOC103412658
GO:2000692	negative regulation of seed maturation	biological_process	1	3500	3	25472	0.0514424	0.155877	2.4259	LOC103412715
GO:0010155	regulation of proton transport	biological_process	1	3500	3	25472	0.0514424	0.155877	2.4259	LOC103412999
GO:1904526	regulation of microtubule binding	biological_process	1	3500	3	25472	0.0514424	0.155877	2.4259	LOC103414585
GO:0006231	dTMP biosynthetic process	biological_process	1	3500	3	25472	0.0514424	0.155877	2.4259	LOC103415158
GO:0031405	lipoic acid binding	molecular_function	1	3500	3	25472	0.0514424	0.155877	2.4259	LOC103416775
GO:0035670	plant-type ovary development	biological_process	1	3500	3	25472	0.0514424	0.155877	2.4259	LOC103416991
GO:0019762	glucosinolate catabolic process	biological_process	1	3500	3	25472	0.0514424	0.155877	2.4259	LOC103417202
GO:0003923	GPI-anchor transamidase activity	molecular_function	1	3500	3	25472	0.0514424	0.155877	2.4259	LOC103417816
GO:0030600	feruloyl esterase activity	molecular_function	1	3500	3	25472	0.0514424	0.155877	2.4259	LOC103418353
GO:0022821	potassium ion antiporter activity	molecular_function	1	3500	3	25472	0.0514424	0.155877	2.4259	LOC103418494
GO:0070899	mitochondrial tRNA wobble uridine modification	biological_process	1	3500	3	25472	0.0514424	0.155877	2.4259	LOC103418530
GO:0003838	sterol 24-C-methyltransferase activity	molecular_function	1	3500	3	25472	0.0514424	0.155877	2.4259	LOC103418631
GO:0003959	NADPH dehydrogenase activity	molecular_function	1	3500	3	25472	0.0514424	0.155877	2.4259	LOC103419668
GO:0009517	PSII associated light-harvesting complex II	cellular_component	1	3500	3	25472	0.0514424	0.155877	2.4259	LOC103420118
GO:0009783	photosystem II antenna complex	cellular_component	1	3500	3	25472	0.0514424	0.155877	2.4259	LOC103420118
GO:0010620	negative regulation of transcription by transcription factor catabolism	biological_process	1	3500	3	25472	0.0514424	0.155877	2.4259	LOC103420206
GO:0031431	Dbf4-dependent protein kinase complex	cellular_component	1	3500	3	25472	0.0514424	0.155877	2.4259	LOC103420206
GO:0043392	negative regulation of DNA binding	biological_process	1	3500	3	25472	0.0514424	0.155877	2.4259	LOC103420206
GO:0032131	alkylated DNA binding	molecular_function	1	3500	3	25472	0.0514424	0.155877	2.4259	LOC103420942
GO:0032993	protein-DNA complex	cellular_component	1	3500	3	25472	0.0514424	0.155877	2.4259	LOC103420942
GO:0045007	depurination	biological_process	1	3500	3	25472	0.0514424	0.155877	2.4259	LOC103420942
GO:0052820	DNA-1,N6-ethenoadenine N-glycosylase activity	molecular_function	1	3500	3	25472	0.0514424	0.155877	2.4259	LOC103420942
GO:0004320	oleoyl-[acyl-carrier-protein] hydrolase activity	molecular_function	1	3500	3	25472	0.0514424	0.155877	2.4259	LOC103421049
GO:0019776	Atg8 ligase activity	molecular_function	1	3500	3	25472	0.0514424	0.155877	2.4259	LOC103421930
GO:0019786	Atg8-specific protease activity	molecular_function	1	3500	3	25472	0.0514424	0.155877	2.4259	LOC103421930
GO:0019276	UDP-N-acetylgalactosamine metabolic process	biological_process	1	3500	3	25472	0.0514424	0.155877	2.4259	LOC103422295
GO:0052630	UDP-N-acetylgalactosamine diphosphorylase activity	molecular_function	1	3500	3	25472	0.0514424	0.155877	2.4259	LOC103422295
GO:0035279	mRNA cleavage involved in gene silencing by miRNA	biological_process	1	3500	3	25472	0.0514424	0.155877	2.4259	LOC103422322
GO:0004333	fumarate hydratase activity	molecular_function	1	3500	3	25472	0.0514424	0.155877	2.4259	LOC103423133
GO:0006106	fumarate metabolic process	biological_process	1	3500	3	25472	0.0514424	0.155877	2.4259	LOC103423133
GO:0045239	tricarboxylic acid cycle enzyme complex	cellular_component	1	3500	3	25472	0.0514424	0.155877	2.4259	LOC103423133
GO:0043087	regulation of GTPase activity	biological_process	1	3500	3	25472	0.0514424	0.155877	2.4259	LOC103423575
GO:1905775	negative regulation of DNA helicase activity	biological_process	1	3500	3	25472	0.0514424	0.155877	2.4259	LOC103423906
GO:0006563	L-serine metabolic process	biological_process	1	3500	3	25472	0.0514424	0.155877	2.4259	LOC103424563
GO:0000469	cleavage involved in rRNA processing	biological_process	1	3500	3	25472	0.0514424	0.155877	2.4259	LOC103424578
GO:0004013	adenosylhomocysteinase activity	molecular_function	1	3500	3	25472	0.0514424	0.155877	2.4259	LOC103425187
GO:0019510	S-adenosylhomocysteine catabolic process	biological_process	1	3500	3	25472	0.0514424	0.155877	2.4259	LOC103425187
GO:0018283	iron incorporation into metallo-sulfur cluster	biological_process	1	3500	3	25472	0.0514424	0.155877	2.4259	LOC103425927
GO:0004311	farnesyltranstransferase activity	molecular_function	1	3500	3	25472	0.0514424	0.155877	2.4259	LOC103426193
GO:0033386	geranylgeranyl diphosphate biosynthetic process	biological_process	1	3500	3	25472	0.0514424	0.155877	2.4259	LOC103426193
GO:0051050	positive regulation of transport	biological_process	1	3500	3	25472	0.0514424	0.155877	2.4259	LOC103426201
GO:0004445	inositol-polyphosphate 5-phosphatase activity	molecular_function	1	3500	3	25472	0.0514424	0.155877	2.4259	LOC103426545
GO:0052659	inositol-1,3,4,5-tetrakisphosphate 5-phosphatase activity	molecular_function	1	3500	3	25472	0.0514424	0.155877	2.4259	LOC103426545
GO:0008301	DNA binding, bending	molecular_function	1	3500	3	25472	0.0514424	0.155877	2.4259	LOC103427581
GO:0098869	cellular oxidant detoxification	biological_process	1	3500	3	25472	0.0514424	0.155877	2.4259	LOC103427921
GO:1901684	arsenate ion transmembrane transport	biological_process	1	3500	3	25472	0.0514424	0.155877	2.4259	LOC103428150
GO:0004660	protein farnesyltransferase activity	molecular_function	1	3500	3	25472	0.0514424	0.155877	2.4259	LOC103429024
GO:0005965	protein farnesyltransferase complex	cellular_component	1	3500	3	25472	0.0514424	0.155877	2.4259	LOC103429024
GO:0018343	protein farnesylation	biological_process	1	3500	3	25472	0.0514424	0.155877	2.4259	LOC103429024
GO:0080021	response to benzoic acid	biological_process	1	3500	3	25472	0.0514424	0.155877	2.4259	LOC103430210
GO:0070524	11-beta-hydroxysteroid dehydrogenase (NADP+) activity	molecular_function	1	3500	3	25472	0.0514424	0.155877	2.4259	LOC103431105
GO:0045333	cellular respiration	biological_process	1	3500	3	25472	0.0514424	0.155877	2.4259	LOC103431812
GO:0008531	riboflavin kinase activity	molecular_function	1	3500	3	25472	0.0514424	0.155877	2.4259	LOC103432227
GO:0009398	FMN biosynthetic process	biological_process	1	3500	3	25472	0.0514424	0.155877	2.4259	LOC103432227
GO:0016174	NAD(P)H oxidase activity	molecular_function	1	3500	3	25472	0.0514424	0.155877	2.4259	LOC103433139
GO:0098807	chloroplast thylakoid membrane protein complex	cellular_component	1	3500	3	25472	0.0514424	0.155877	2.4259	LOC103433175
GO:0019903	protein phosphatase binding	molecular_function	1	3500	3	25472	0.0514424	0.155877	2.4259	LOC103433516
GO:0047918	GDP-mannose 3,5-epimerase activity	molecular_function	1	3500	3	25472	0.0514424	0.155877	2.4259	LOC103434162
GO:0050278	sedoheptulose-bisphosphatase activity	molecular_function	1	3500	3	25472	0.0514424	0.155877	2.4259	LOC103435411
GO:0010438	cellular response to sulfur starvation	biological_process	1	3500	3	25472	0.0514424	0.155877	2.4259	LOC103435818
GO:2000039	regulation of trichome morphogenesis	biological_process	1	3500	3	25472	0.0514424	0.155877	2.4259	LOC103436166
GO:0036524	protein deglycase activity	molecular_function	1	3500	3	25472	0.0514424	0.155877	2.4259	LOC103436483
GO:0036529	protein deglycation, glyoxal removal	biological_process	1	3500	3	25472	0.0514424	0.155877	2.4259	LOC103436483
GO:0106046	guanine deglycation, glyoxal removal	biological_process	1	3500	3	25472	0.0514424	0.155877	2.4259	LOC103436483
GO:0061416	regulation of transcription from RNA polymerase II promoter in response to salt stress	biological_process	1	3500	3	25472	0.0514424	0.155877	2.4259	LOC103436721
GO:0046914	transition metal ion binding	molecular_function	1	3500	3	25472	0.0514424	0.155877	2.4259	LOC103437526
GO:0046916	cellular transition metal ion homeostasis	biological_process	1	3500	3	25472	0.0514424	0.155877	2.4259	LOC103437526
GO:0015824	proline transport	biological_process	1	3500	3	25472	0.0514424	0.155877	2.4259	LOC103437650
GO:0035352	NAD transmembrane transport	biological_process	1	3500	3	25472	0.0514424	0.155877	2.4259	LOC103437886
GO:0051724	NAD transmembrane transporter activity	molecular_function	1	3500	3	25472	0.0514424	0.155877	2.4259	LOC103437886
GO:0002940	tRNA N2-guanine methylation	biological_process	1	3500	3	25472	0.0514424	0.155877	2.4259	LOC103438303
GO:0004827	proline-tRNA ligase activity	molecular_function	1	3500	3	25472	0.0514424	0.155877	2.4259	LOC103439804
GO:0006433	prolyl-tRNA aminoacylation	biological_process	1	3500	3	25472	0.0514424	0.155877	2.4259	LOC103439804
GO:0000481	maturation of 5S rRNA	biological_process	1	3500	3	25472	0.0514424	0.155877	2.4259	LOC103439873
GO:0050474	(S)-norcoclaurine synthase activity	molecular_function	1	3500	3	25472	0.0514424	0.155877	2.4259	LOC103439977
GO:2001108	positive regulation of Rho guanyl-nucleotide exchange factor activity	biological_process	1	3500	3	25472	0.0514424	0.155877	2.4259	LOC103440210
GO:0004107	chorismate synthase activity	molecular_function	1	3500	3	25472	0.0514424	0.155877	2.4259	LOC103440666
GO:0016166	phytoene dehydrogenase activity	molecular_function	1	3500	3	25472	0.0514424	0.155877	2.4259	LOC103440874
GO:0061575	cyclin-dependent protein serine/threonine kinase activator activity	molecular_function	1	3500	3	25472	0.0514424	0.155877	2.4259	LOC103440985
GO:0005901	caveola	cellular_component	1	3500	3	25472	0.0514424	0.155877	2.4259	LOC103441334
GO:0015893	drug transport	biological_process	1	3500	3	25472	0.0514424	0.155877	2.4259	LOC103441751
GO:1905428	regulation of plant organ formation	biological_process	1	3500	3	25472	0.0514424	0.155877	2.4259	LOC103441751
GO:0015462	ATPase-coupled protein transmembrane transporter activity	molecular_function	1	3500	3	25472	0.0514424	0.155877	2.4259	LOC103441922
GO:0017038	protein import	biological_process	1	3500	3	25472	0.0514424	0.155877	2.4259	LOC103441922
GO:0033385	geranylgeranyl diphosphate metabolic process	biological_process	1	3500	3	25472	0.0514424	0.155877	2.4259	LOC103441948
GO:0033521	phytyl diphosphate biosynthetic process	biological_process	1	3500	3	25472	0.0514424	0.155877	2.4259	LOC103441948
GO:0045550	geranylgeranyl reductase activity	molecular_function	1	3500	3	25472	0.0514424	0.155877	2.4259	LOC103441948
GO:0102067	geranylgeranyl diphosphate reductase activity	molecular_function	1	3500	3	25472	0.0514424	0.155877	2.4259	LOC103441948
GO:0006020	inositol metabolic process	biological_process	1	3500	3	25472	0.0514424	0.155877	2.4259	LOC103442791
GO:0006473	protein acetylation	biological_process	1	3500	3	25472	0.0514424	0.155877	2.4259	LOC103442866
GO:0009310	amine catabolic process	biological_process	1	3500	3	25472	0.0514424	0.155877	2.4259	LOC103443458
GO:0042764	ascospore-type prospore	cellular_component	1	3500	3	25472	0.0514424	0.155877	2.4259	LOC103443458
GO:0090706	specification of plant organ position	biological_process	1	3500	3	25472	0.0514424	0.155877	2.4259	LOC103444033
GO:1901352	negative regulation of phosphatidylglycerol biosynthetic process	biological_process	1	3500	3	25472	0.0514424	0.155877	2.4259	LOC103444583
GO:2001246	negative regulation of phosphatidylcholine biosynthetic process	biological_process	1	3500	3	25472	0.0514424	0.155877	2.4259	LOC103444583
GO:0010489	UDP-4-keto-6-deoxy-glucose-3,5-epimerase activity	molecular_function	1	3500	3	25472	0.0514424	0.155877	2.4259	LOC103444758
GO:0010490	UDP-4-keto-rhamnose-4-keto-reductase activity	molecular_function	1	3500	3	25472	0.0514424	0.155877	2.4259	LOC103444758
GO:0000375	RNA splicing, via transesterification reactions	biological_process	1	3500	3	25472	0.0514424	0.155877	2.4259	LOC103445190
GO:0042789	mRNA transcription by RNA polymerase II	biological_process	1	3500	3	25472	0.0514424	0.155877	2.4259	LOC103445449
GO:0070827	chromatin maintenance	biological_process	1	3500	3	25472	0.0514424	0.155877	2.4259	LOC103445449
GO:0000328	fungal-type vacuole lumen	cellular_component	1	3500	3	25472	0.0514424	0.155877	2.4259	LOC103445495
GO:0032453	histone demethylase activity (H3-K4 specific)	molecular_function	1	3500	3	25472	0.0514424	0.155877	2.4259	LOC103446074
GO:0008124	4-alpha-hydroxytetrahydrobiopterin dehydratase activity	molecular_function	1	3500	3	25472	0.0514424	0.155877	2.4259	LOC103446216
GO:2000072	regulation of defense response to fungus, incompatible interaction	biological_process	1	3500	3	25472	0.0514424	0.155877	2.4259	LOC103446284
GO:0071588	hydrogen peroxide mediated signaling pathway	biological_process	1	3500	3	25472	0.0514424	0.155877	2.4259	LOC103446591
GO:0080041	ADP-ribose pyrophosphohydrolase activity	molecular_function	1	3500	3	25472	0.0514424	0.155877	2.4259	LOC103447435
GO:0015089	high-affinity copper ion transmembrane transporter activity	molecular_function	1	3500	3	25472	0.0514424	0.155877	2.4259	LOC103447483
GO:0098705	copper ion import across plasma membrane	biological_process	1	3500	3	25472	0.0514424	0.155877	2.4259	LOC103447483
GO:0000150	recombinase activity	molecular_function	1	3500	3	25472	0.0514424	0.155877	2.4259	LOC103447829
GO:0004392	heme oxygenase (decyclizing) activity	molecular_function	1	3500	3	25472	0.0514424	0.155877	2.4259	LOC103448109
GO:0006788	heme oxidation	biological_process	1	3500	3	25472	0.0514424	0.155877	2.4259	LOC103448109
GO:0010024	phytochromobilin biosynthetic process	biological_process	1	3500	3	25472	0.0514424	0.155877	2.4259	LOC103448109
GO:0008447	L-ascorbate oxidase activity	molecular_function	1	3500	3	25472	0.0514424	0.155877	2.4259	LOC103448151
GO:0008936	nicotinamidase activity	molecular_function	1	3500	3	25472	0.0514424	0.155877	2.4259	LOC103448186
GO:0006742	NADP catabolic process	biological_process	1	3500	3	25472	0.0514424	0.155877	2.4259	LOC103448292
GO:0019677	NAD catabolic process	biological_process	1	3500	3	25472	0.0514424	0.155877	2.4259	LOC103448292
GO:0080146	L-cysteine desulfhydrase activity	molecular_function	1	3500	3	25472	0.0514424	0.155877	2.4259	LOC103448310
GO:0009905	ent-copalyl diphosphate synthase activity	molecular_function	1	3500	3	25472	0.0514424	0.155877	2.4259	LOC103448353
GO:0008836	diaminopimelate decarboxylase activity	molecular_function	1	3500	3	25472	0.0514424	0.155877	2.4259	LOC103448417
GO:0060627	regulation of vesicle-mediated transport	biological_process	1	3500	3	25472	0.0514424	0.155877	2.4259	LOC103448778
GO:0009513	etioplast	cellular_component	1	3500	3	25472	0.0514424	0.155877	2.4259	LOC103449037
GO:0071586	CAAX-box protein processing	biological_process	1	3500	3	25472	0.0514424	0.155877	2.4259	LOC103449451
GO:0045552	dihydrokaempferol 4-reductase activity	molecular_function	1	3500	3	25472	0.0514424	0.155877	2.4259	LOC103450464
GO:0047890	flavanone 4-reductase activity	molecular_function	1	3500	3	25472	0.0514424	0.155877	2.4259	LOC103450464
GO:0003839	gamma-glutamylcyclotransferase activity	molecular_function	1	3500	3	25472	0.0514424	0.155877	2.4259	LOC103450651
GO:0016212	kynurenine-oxoglutarate transaminase activity	molecular_function	1	3500	3	25472	0.0514424	0.155877	2.4259	LOC103450660
GO:0034276	kynurenic acid biosynthetic process	biological_process	1	3500	3	25472	0.0514424	0.155877	2.4259	LOC103450660
GO:0047536	2-aminoadipate transaminase activity	molecular_function	1	3500	3	25472	0.0514424	0.155877	2.4259	LOC103450660
GO:0008967	phosphoglycolate phosphatase activity	molecular_function	1	3500	3	25472	0.0514424	0.155877	2.4259	LOC103451169
GO:0015081	sodium ion transmembrane transporter activity	molecular_function	1	3500	3	25472	0.0514424	0.155877	2.4259	LOC103451334
GO:0080176	xyloglucan 1,6-alpha-xylosidase activity	molecular_function	1	3500	3	25472	0.0514424	0.155877	2.4259	LOC103451659
GO:0042548	regulation of photosynthesis, light reaction	biological_process	1	3500	3	25472	0.0514424	0.155877	2.4259	LOC103451676
GO:0030692	Noc4p-Nop14p complex	cellular_component	1	3500	3	25472	0.0514424	0.155877	2.4259	LOC103451745
GO:0033919	glucan 1,3-alpha-glucosidase activity	molecular_function	1	3500	3	25472	0.0514424	0.155877	2.4259	LOC103452212
GO:0008517	folic acid transmembrane transporter activity	molecular_function	1	3500	3	25472	0.0514424	0.155877	2.4259	LOC103453202
GO:0023051	regulation of signaling	biological_process	1	3500	3	25472	0.0514424	0.155877	2.4259	LOC103453350
GO:0005244	voltage-gated ion channel activity	molecular_function	1	3500	3	25472	0.0514424	0.155877	2.4259	LOC103453655
GO:0102985	Delta12-fatty-acid desaturase activity	molecular_function	1	3500	3	25472	0.0514424	0.155877	2.4259	LOC103454260
GO:0006915	apoptotic process	biological_process	1	3500	3	25472	0.0514424	0.155877	2.4259	LOC103454573
GO:0043653	mitochondrial fragmentation involved in apoptotic process	biological_process	1	3500	3	25472	0.0514424	0.155877	2.4259	LOC103454573
GO:0010618	aerenchyma formation	biological_process	1	3500	3	25472	0.0514424	0.155877	2.4259	LOC103455264
GO:0009930	longitudinal side of cell surface	cellular_component	1	3500	3	25472	0.0514424	0.155877	2.4259	LOC103455436
GO:0004633	phosphopantothenoylcysteine decarboxylase activity	molecular_function	1	3500	3	25472	0.0514424	0.155877	2.4259	LOC103456007
GO:0005344	oxygen carrier activity	molecular_function	1	3500	3	25472	0.0514424	0.155877	2.4259	LOC103456053
GO:0006354	DNA-templated transcription, elongation	biological_process	1	3500	3	25472	0.0514424	0.155877	2.4259	LOC108170489
GO:0004490	methylglutaconyl-CoA hydratase activity	molecular_function	1	3500	3	25472	0.0514424	0.155877	2.4259	LOC108171037
GO:0018002	N-terminal peptidyl-glutamic acid acetylation	biological_process	1	3500	3	25472	0.0514424	0.155877	2.4259	LOC108171391
GO:0031415	NatA complex	cellular_component	1	3500	3	25472	0.0514424	0.155877	2.4259	LOC108171391
GO:1990190	peptide-glutamate-N-acetyltransferase activity	molecular_function	1	3500	3	25472	0.0514424	0.155877	2.4259	LOC108171391
GO:0010301	xanthoxin dehydrogenase activity	molecular_function	1	3500	3	25472	0.0514424	0.155877	2.4259	LOC114819149
GO:0008652	cellular amino acid biosynthetic process	biological_process	1	3500	3	25472	0.0514424	0.155877	2.4259	LOC114819909
GO:0043157	response to cation stress	biological_process	1	3500	3	25472	0.0514424	0.155877	2.4259	LOC114820150
GO:0030031	cell projection assembly	biological_process	1	3500	3	25472	0.0514424	0.155877	2.4259	LOC114821230
GO:0030866	cortical actin cytoskeleton organization	biological_process	1	3500	3	25472	0.0514424	0.155877	2.4259	LOC114821230
GO:0015688	iron chelate transport	biological_process	1	3500	3	25472	0.0514424	0.155877	2.4259	LOC114822770
GO:0033473	indoleacetic acid conjugate metabolic process	biological_process	1	3500	3	25472	0.0514424	0.155877	2.4259	LOC114823875
GO:0016246	RNA interference	biological_process	1	3500	3	25472	0.0514424	0.155877	2.4259	LOC114825051
GO:0019148	D-cysteine desulfhydrase activity	molecular_function	1	3500	3	25472	0.0514424	0.155877	2.4259	LOC114825426
GO:0048587	regulation of short-day photoperiodism, flowering	biological_process	1	3500	3	25472	0.0514424	0.155877	2.4259	LOC114826603
GO:0071475	cellular hyperosmotic salinity response	biological_process	1	3500	3	25472	0.0514424	0.155877	2.4259	LOC114827601
GO:0032791	lead ion binding	molecular_function	1	3500	3	25472	0.0514424	0.155877	2.4259	LOC114827637
GO:0046870	cadmium ion binding	molecular_function	1	3500	3	25472	0.0514424	0.155877	2.4259	LOC114827637
GO:0052894	norspermine:oxygen oxidoreductase activity	molecular_function	1	3500	3	25472	0.0514424	0.155877	2.4259	PAO
GO:0052895	N1-acetylspermine:oxygen oxidoreductase (N1-acetylspermidine-forming) activity	molecular_function	1	3500	3	25472	0.0514424	0.155877	2.4259	PAO
GO:0052901	spermine:oxygen oxidoreductase (spermidine-forming) activity	molecular_function	1	3500	3	25472	0.0514424	0.155877	2.4259	PAO
GO:0047641	aldose-6-phosphate reductase (NADPH) activity	molecular_function	1	3500	3	25472	0.0514424	0.155877	2.4259	S6PDH
GO:0009970	cellular response to sulfate starvation	biological_process	3	3500	11	25472	0.0527515	0.158344	1.98483	LOC103401023; LOC103402159; LOC103452551
GO:1900140	regulation of seedling development	biological_process	3	3500	11	25472	0.0527515	0.158344	1.98483	LOC103403196; LOC103406235; LOC103413424
GO:0048309	endoplasmic reticulum inheritance	biological_process	3	3500	11	25472	0.0527515	0.158344	1.98483	LOC103408028; LOC103428482; LOC103432962
GO:0052739	phosphatidylserine 1-acylhydrolase activity	molecular_function	3	3500	11	25472	0.0527515	0.158344	1.98483	LOC103408145; LOC103449224; LOC103451162
GO:0052740	1-acyl-2-lysophosphatidylserine acylhydrolase activity	molecular_function	3	3500	11	25472	0.0527515	0.158344	1.98483	LOC103408145; LOC103449224; LOC103451162
GO:0008889	glycerophosphodiester phosphodiesterase activity	molecular_function	3	3500	11	25472	0.0527515	0.158344	1.98483	LOC103411114; LOC103415331; LOC103430075
GO:0045927	positive regulation of growth	biological_process	3	3500	11	25472	0.0527515	0.158344	1.98483	LOC103417526; LOC103433917; LOC103444114
GO:0016831	carboxy-lyase activity	molecular_function	3	3500	11	25472	0.0527515	0.158344	1.98483	LOC103419936; LOC103425929; LOC103451198
GO:0009410	response to xenobiotic stimulus	biological_process	3	3500	11	25472	0.0527515	0.158344	1.98483	LOC103420111; LOC103422821; LOC103447521
GO:0010332	response to gamma radiation	biological_process	3	3500	11	25472	0.0527515	0.158344	1.98483	LOC103425438; LOC103435036; LOC114826890
GO:0009150	purine ribonucleotide metabolic process	biological_process	3	3500	11	25472	0.0527515	0.158344	1.98483	LOC103436413; LOC108174913; LOC114819943
GO:0010411	xyloglucan metabolic process	biological_process	11	3500	53	25472	0.0528205	0.158416	1.51047	LOC103402984; LOC103403007; LOC103409272; LOC103430782; LOC103434536; LOC103442277; LOC103443395; LOC103449997; LOC103451659; LOC103451937; LOC114822104
GO:0010329	auxin efflux transmembrane transporter activity	molecular_function	7	3500	31	25472	0.0537022	0.160787	1.64335	LOC103402598; LOC103402615; LOC103404434; LOC103405234; LOC103442343; LOC114827079; LOC114827345
GO:0010540	basipetal auxin transport	biological_process	7	3500	31	25472	0.0537022	0.160787	1.64335	LOC103404434; LOC103405234; LOC103418494; LOC103442073; LOC103442343; LOC114827079; LOC114827345
GO:0009504	cell plate	cellular_component	12	3500	59	25472	0.054589	0.163303	1.48021	LOC103407702; LOC103411182; LOC103433737; LOC103435175; LOC103437867; LOC103440339; LOC103447201; LOC103451534; LOC103454171; LOC114821175; LOC114823901; LOC114825669
GO:0016747	transferase activity, transferring acyl groups other than amino-acyl groups	molecular_function	13	3500	65	25472	0.0558393	0.166902	1.45554	LOC103405496; LOC103406706; LOC103413349; LOC103415436; LOC103424244; LOC103428164; LOC103436805; LOC103440744; LOC103445094; LOC103447337; LOC103453624; LOC114823886; LOC114825597
GO:0008198	ferrous iron binding	molecular_function	6	3500	26	25472	0.0564278	0.167835	1.67947	LOC103401654; LOC103401823; LOC103425927; LOC103444109; LOC103455654; LOC114820656
GO:0009704	de-etiolation	biological_process	6	3500	26	25472	0.0564278	0.167835	1.67947	LOC103403776; LOC103413083; LOC103424576; LOC103437937; LOC103451886; LOC103452346
GO:0009825	multidimensional cell growth	biological_process	10	3500	48	25472	0.0575885	0.167835	1.51619	LOC103400659; LOC103402341; LOC103409844; LOC103417569; LOC103418473; LOC103446184; LOC103451777; LOC103453829; LOC103455436; LOC114821230
GO:0031647	regulation of protein stability	biological_process	10	3500	48	25472	0.0575885	0.167835	1.51619	LOC103414535; LOC103428464; LOC103430763; LOC103438645; LOC103438741; LOC103446284; LOC103449676; LOC103452644; LOC103453749; LOC108172875
GO:0008272	sulfate transport	biological_process	4	3500	16	25472	0.0577017	0.167835	1.81943	LOC103402159; LOC103422017; LOC103449341; LOC103451518
GO:0005227	calcium activated cation channel activity	molecular_function	4	3500	16	25472	0.0577017	0.167835	1.81943	LOC103404470; LOC103436835; LOC103446746; LOC114827323
GO:0030976	thiamine pyrophosphate binding	molecular_function	4	3500	16	25472	0.0577017	0.167835	1.81943	LOC103406342; LOC103419936; LOC103425929; LOC103451198
GO:0016135	saponin biosynthetic process	biological_process	4	3500	16	25472	0.0577017	0.167835	1.81943	LOC103413895; LOC103422316; LOC103443518; LOC103453334
GO:0034707	chloride channel complex	cellular_component	4	3500	16	25472	0.0577017	0.167835	1.81943	LOC103417019; LOC103436006; LOC103453540; LOC108171627
GO:0004300	enoyl-CoA hydratase activity	molecular_function	4	3500	16	25472	0.0577017	0.167835	1.81943	LOC103418149; LOC103434903; LOC103452890; LOC108171037
GO:0015996	chlorophyll catabolic process	biological_process	5	3500	21	25472	0.0581317	0.167835	1.73279	LOC103400502; LOC103401375; LOC103440940; LOC103448940; LOC103456109
GO:1902183	regulation of shoot apical meristem development	biological_process	5	3500	21	25472	0.0581317	0.167835	1.73279	LOC103400911; LOC103416856; LOC103444033; LOC103453906; LOC103456151
GO:0048440	carpel development	biological_process	5	3500	21	25472	0.0581317	0.167835	1.73279	LOC103401390; LOC103405834; LOC103431299; LOC103431650; LOC103438264
GO:0046933	proton-transporting ATP synthase activity, rotational mechanism	molecular_function	5	3500	21	25472	0.0581317	0.167835	1.73279	LOC103407484; LOC103434495; LOC103443236; LOC103446721; LOC108174228
GO:0006535	cysteine biosynthetic process from serine	biological_process	5	3500	21	25472	0.0581317	0.167835	1.73279	LOC103408707; LOC103413454; LOC103434138; LOC103434146; LOC103448310
GO:0004040	amidase activity	molecular_function	5	3500	21	25472	0.0581317	0.167835	1.73279	LOC103408917; LOC103412168; LOC103414115; LOC103451331; LOC114823393
GO:0016132	brassinosteroid biosynthetic process	biological_process	8	3500	37	25472	0.0589315	0.167835	1.57356	LOC103401541; LOC103422316; LOC103432823; LOC103437230; LOC103440744; LOC103443518; LOC103445207; LOC103453334
GO:0006081	cellular aldehyde metabolic process	biological_process	2	3500	7	25472	0.0590593	0.167835	2.07935	LOC103401089; LOC103449962
GO:0006307	DNA dealkylation involved in DNA repair	biological_process	2	3500	7	25472	0.0590593	0.167835	2.07935	LOC103401654; LOC103420942
GO:0006809	nitric oxide biosynthetic process	biological_process	2	3500	7	25472	0.0590593	0.167835	2.07935	LOC103401883; LOC103439424
GO:0070084	protein initiator methionine removal	biological_process	2	3500	7	25472	0.0590593	0.167835	2.07935	LOC103402725; LOC103414250
GO:0006228	UTP biosynthetic process	biological_process	2	3500	7	25472	0.0590593	0.167835	2.07935	LOC103404467; LOC103437370
GO:0006839	mitochondrial transport	biological_process	2	3500	7	25472	0.0590593	0.167835	2.07935	LOC103404777; LOC103449341
GO:0043619	regulation of transcription from RNA polymerase II promoter in response to oxidative stress	biological_process	2	3500	7	25472	0.0590593	0.167835	2.07935	LOC103404780; LOC103437431
GO:0009653	anatomical structure morphogenesis	biological_process	2	3500	7	25472	0.0590593	0.167835	2.07935	LOC103405387; LOC103452176
GO:0006572	tyrosine catabolic process	biological_process	2	3500	7	25472	0.0590593	0.167835	2.07935	LOC103405636; LOC103448720
GO:0010032	meiotic chromosome condensation	biological_process	2	3500	7	25472	0.0590593	0.167835	2.07935	LOC103405828; LOC103433704
GO:1905392	plant organ morphogenesis	biological_process	2	3500	7	25472	0.0590593	0.167835	2.07935	LOC103405834; LOC103438264
GO:0004066	asparagine synthase (glutamine-hydrolyzing) activity	molecular_function	2	3500	7	25472	0.0590593	0.167835	2.07935	LOC103406611; LOC103411783
GO:0102549	1-18:1-2-16:0-monogalactosyldiacylglycerol lipase activity	molecular_function	2	3500	7	25472	0.0590593	0.167835	2.07935	LOC103408145; LOC103449224
GO:0043682	copper-transporting ATPase activity	molecular_function	2	3500	7	25472	0.0590593	0.167835	2.07935	LOC103411985; LOC103452771
GO:0045926	negative regulation of growth	biological_process	2	3500	7	25472	0.0590593	0.167835	2.07935	LOC103414585; LOC103435175
GO:0004321	fatty-acyl-CoA synthase activity	molecular_function	2	3500	7	25472	0.0590593	0.167835	2.07935	LOC103415175; LOC103455025
GO:0015690	aluminum cation transport	biological_process	2	3500	7	25472	0.0590593	0.167835	2.07935	LOC103415736; LOC103424916
GO:0003857	3-hydroxyacyl-CoA dehydrogenase activity	molecular_function	2	3500	7	25472	0.0590593	0.167835	2.07935	LOC103418149; LOC103452890
GO:0016570	histone modification	biological_process	2	3500	7	25472	0.0590593	0.167835	2.07935	LOC103419513; LOC114825017
GO:0052033	pathogen-associated molecular pattern dependent induction by symbiont of host innate immune response	biological_process	2	3500	7	25472	0.0590593	0.167835	2.07935	LOC103420911; LOC114823246
GO:0070262	peptidyl-serine dephosphorylation	biological_process	2	3500	7	25472	0.0590593	0.167835	2.07935	LOC103420991; LOC103440602
GO:0031542	positive regulation of anthocyanin biosynthetic process	biological_process	2	3500	7	25472	0.0590593	0.167835	2.07935	LOC103421948; LOC114821796
GO:0008551	cadmium-exporting ATPase activity	molecular_function	2	3500	7	25472	0.0590593	0.167835	2.07935	LOC103424200; LOC103453726
GO:0016463	zinc-exporting ATPase activity	molecular_function	2	3500	7	25472	0.0590593	0.167835	2.07935	LOC103424200; LOC103453726
GO:0007584	response to nutrient	biological_process	2	3500	7	25472	0.0590593	0.167835	2.07935	LOC103426545; LOC103435169
GO:0006488	dolichol-linked oligosaccharide biosynthetic process	biological_process	2	3500	7	25472	0.0590593	0.167835	2.07935	LOC103427573; LOC103430439
GO:0010111	glyoxysome organization	biological_process	2	3500	7	25472	0.0590593	0.167835	2.07935	LOC103429319; LOC103445421
GO:0010124	phenylacetate catabolic process	biological_process	2	3500	7	25472	0.0590593	0.167835	2.07935	LOC103429319; LOC103445421
GO:0008441	3'(2'),5'-bisphosphate nucleotidase activity	molecular_function	2	3500	7	25472	0.0590593	0.167835	2.07935	LOC103430260; LOC103446461
GO:0003919	FMN adenylyltransferase activity	molecular_function	2	3500	7	25472	0.0590593	0.167835	2.07935	LOC103432227; LOC103451442
GO:1902479	positive regulation of defense response to bacterium, incompatible interaction	biological_process	2	3500	7	25472	0.0590593	0.167835	2.07935	LOC103432302; LOC103444203
GO:0015994	chlorophyll metabolic process	biological_process	2	3500	7	25472	0.0590593	0.167835	2.07935	LOC103433606; LOC103452951
GO:0036381	pyridoxal 5'-phosphate synthase (glutamine hydrolysing) activity	molecular_function	2	3500	7	25472	0.0590593	0.167835	2.07935	LOC103433606; LOC103452951
GO:0051754	meiotic sister chromatid cohesion, centromeric	biological_process	2	3500	7	25472	0.0590593	0.167835	2.07935	LOC103433704; LOC103436676
GO:0006072	glycerol-3-phosphate metabolic process	biological_process	2	3500	7	25472	0.0590593	0.167835	2.07935	LOC103433953; LOC103454484
GO:0015245	fatty acid transmembrane transporter activity	molecular_function	2	3500	7	25472	0.0590593	0.167835	2.07935	LOC103436604; LOC103444820
GO:0006654	phosphatidic acid biosynthetic process	biological_process	2	3500	7	25472	0.0590593	0.167835	2.07935	LOC103437610; LOC103451296
GO:1902171	regulation of tocopherol cyclase activity	biological_process	2	3500	7	25472	0.0590593	0.167835	2.07935	LOC103442465; LOC103456109
GO:0000275	mitochondrial proton-transporting ATP synthase complex, catalytic core F(1)	cellular_component	2	3500	7	25472	0.0590593	0.167835	2.07935	LOC103443236; LOC108174228
GO:0003999	adenine phosphoribosyltransferase activity	molecular_function	2	3500	7	25472	0.0590593	0.167835	2.07935	LOC103444025; LOC103456217
GO:0006168	adenine salvage	biological_process	2	3500	7	25472	0.0590593	0.167835	2.07935	LOC103444025; LOC103456217
GO:0032451	demethylase activity	molecular_function	2	3500	7	25472	0.0590593	0.167835	2.07935	LOC103444603; LOC103449078
GO:0004181	metallocarboxypeptidase activity	molecular_function	2	3500	7	25472	0.0590593	0.167835	2.07935	LOC103445495; LOC114819251
GO:0043066	negative regulation of apoptotic process	biological_process	2	3500	7	25472	0.0590593	0.167835	2.07935	LOC103447717; LOC103455896
GO:0009718	anthocyanin-containing compound biosynthetic process	biological_process	11	3500	54	25472	0.0597582	0.169684	1.4825	LOC103401840; LOC103405327; LOC103410493; LOC103420802; LOC103421948; LOC103434746; LOC103437326; LOC103437327; LOC103440008; LOC103446447; LOC103455522
GO:0000325	plant-type vacuole	cellular_component	12	3500	60	25472	0.0612743	0.173849	1.45554	LOC103416673; LOC103421060; LOC103427839; LOC103431057; LOC103431392; LOC103432582; LOC103438940; LOC103443387; LOC103448442; LOC103449273; LOC103452081; LOC108173828
GO:0015706	nitrate transport	biological_process	9	3500	43	25472	0.0627205	0.177809	1.52324	LOC103409678; LOC103417019; LOC103429586; LOC103433702; LOC103435647; LOC103436871; LOC103437664; LOC103441537; LOC108173828
GO:0042644	chloroplast nucleoid	cellular_component	7	3500	32	25472	0.0633141	0.179348	1.592	LOC103412245; LOC103420753; LOC103425493; LOC103428029; LOC103449037; LOC103451457; LOC103452780
GO:0009505	plant-type cell wall	cellular_component	46	3500	275	25472	0.0655477	0.185525	1.21736	LOC103404253; LOC103405827; LOC103406209; LOC103408778; LOC103411200; LOC103422468; LOC103425102; LOC103427665; LOC103429506; LOC103430729; LOC103431288; LOC103433178; LOC103433494; LOC103434744; LOC103435060; LOC103436766; LOC103436933; LOC103437866; LOC103439320; LOC103439495; LOC103441946; LOC103443836; LOC103444612; LOC103444863; LOC103445112; LOC103447119; LOC103447604; LOC103447719; LOC1034…
GO:0030307	positive regulation of cell growth	biological_process	6	3500	27	25472	0.0674927	0.190877	1.61727	LOC103415886; LOC103421310; LOC103425103; LOC103428888; LOC103439980; LOC103445790
GO:0006636	unsaturated fatty acid biosynthetic process	biological_process	8	3500	38	25472	0.0681913	0.192698	1.53215	LOC103419381; LOC103429090; LOC103434694; LOC103440767; LOC103447381; LOC103447641; LOC103453843; LOC103454260
GO:0003993	acid phosphatase activity	molecular_function	13	3500	67	25472	0.069186	0.195352	1.41209	LOC103402654; LOC103412482; LOC103418853; LOC103430610; LOC103430929; LOC103439593; LOC103440369; LOC103449530; LOC103449864; LOC103450963; LOC103455654; LOC114820656; LOC114821121
GO:0031380	nuclear RNA-directed RNA polymerase complex	cellular_component	3	3500	12	25472	0.0707727	0.197878	1.81943	LOC103400708; LOC103444345; LOC103451530
GO:0004020	adenylylsulfate kinase activity	molecular_function	3	3500	12	25472	0.0707727	0.197878	1.81943	LOC103401506; LOC103410737; LOC103418455
GO:0070814	hydrogen sulfide biosynthetic process	biological_process	3	3500	12	25472	0.0707727	0.197878	1.81943	LOC103401506; LOC103410737; LOC103418455
GO:0042138	meiotic DNA double-strand break formation	biological_process	3	3500	12	25472	0.0707727	0.197878	1.81943	LOC103401937; LOC103416552; LOC103419314
GO:0009986	cell surface	cellular_component	3	3500	12	25472	0.0707727	0.197878	1.81943	LOC103402598; LOC103412999; LOC103455654
GO:0000210	NAD+ diphosphatase activity	molecular_function	3	3500	12	25472	0.0707727	0.197878	1.81943	LOC103405050; LOC103443062; LOC103448292
GO:0031314	extrinsic component of mitochondrial inner membrane	cellular_component	3	3500	12	25472	0.0707727	0.197878	1.81943	LOC103407620; LOC103447135; LOC114821119
GO:0016320	endoplasmic reticulum membrane fusion	biological_process	3	3500	12	25472	0.0707727	0.197878	1.81943	LOC103408028; LOC103428482; LOC103432962
GO:0032922	circadian regulation of gene expression	biological_process	3	3500	12	25472	0.0707727	0.197878	1.81943	LOC103419738; LOC103435071; LOC114826603
GO:0006796	phosphate-containing compound metabolic process	biological_process	3	3500	12	25472	0.0707727	0.197878	1.81943	LOC103422349; LOC103426140; LOC103450198
GO:0045041	protein import into mitochondrial intermembrane space	biological_process	3	3500	12	25472	0.0707727	0.197878	1.81943	LOC103424023; LOC103430221; LOC103439818
GO:0010016	shoot system morphogenesis	biological_process	3	3500	12	25472	0.0707727	0.197878	1.81943	LOC103427488; LOC103427511; LOC114827601
GO:0009860	pollen tube growth	biological_process	21	3500	116	25472	0.0708112	0.197878	1.31752	LOC103404347; LOC103414741; LOC103416019; LOC103416548; LOC103425955; LOC103430624; LOC103440210; LOC103442254; LOC103442270; LOC103443794; LOC103443836; LOC103443879; LOC103445104; LOC103446998; LOC103448626; LOC103450675; LOC103451976; LOC103453928; LOC103454360; LOC114824866; LOC114825197
GO:0051119	sugar transmembrane transporter activity	molecular_function	5	3500	22	25472	0.0709899	0.197906	1.65403	LOC103404717; LOC103407259; LOC103410295; LOC103414170; LOC103434230
GO:0047134	protein-disulfide reductase activity	molecular_function	5	3500	22	25472	0.0709899	0.197906	1.65403	LOC103416548; LOC103445306; LOC103450351; LOC103451976; LOC114824866
GO:0010189	vitamin E biosynthetic process	biological_process	5	3500	22	25472	0.0709899	0.197906	1.65403	LOC103441948; LOC103443970; LOC103448720; LOC103449390; LOC103453843
GO:0006349	regulation of gene expression by genetic imprinting	biological_process	4	3500	17	25472	0.0728216	0.202372	1.7124	LOC103400372; LOC103401167; LOC103401564; LOC103426187
GO:0003846	2-acylglycerol O-acyltransferase activity	molecular_function	4	3500	17	25472	0.0728216	0.202372	1.7124	LOC103402693; LOC103406163; LOC103431028; LOC103438266
GO:0036297	interstrand cross-link repair	biological_process	4	3500	17	25472	0.0728216	0.202372	1.7124	LOC103405483; LOC103450031; LOC114821985; LOC114822098
GO:0072593	reactive oxygen species metabolic process	biological_process	4	3500	17	25472	0.0728216	0.202372	1.7124	LOC103432295; LOC103433139; LOC103433937; LOC103434783
GO:0006281	DNA repair	biological_process	40	3500	238	25472	0.0732322	0.203352	1.22315	LOC103400222; LOC103401654; LOC103402596; LOC103405483; LOC103407080; LOC103412707; LOC103413593; LOC103413741; LOC103415766; LOC103416950; LOC103417767; LOC103418672; LOC103421447; LOC103422197; LOC103423193; LOC103424136; LOC103425160; LOC103425575; LOC103426927; LOC103428449; LOC103433915; LOC103435036; LOC103435979; LOC103436119; LOC103438380; LOC103438958; LOC103440429; LOC103440505; LOC1034…
GO:0010187	negative regulation of seed germination	biological_process	7	3500	33	25472	0.0739286	0.204801	1.54376	GATA5; LOC103401390; LOC103405643; LOC103406741; LOC103431299; LOC103435793; LOC103446284
GO:0003824	catalytic activity	molecular_function	7	3500	33	25472	0.0739286	0.204801	1.54376	LOC103405853; LOC103409319; LOC103415462; LOC103421875; LOC103427403; LOC103431322; LOC114825051
GO:0005385	zinc ion transmembrane transporter activity	molecular_function	7	3500	33	25472	0.0739286	0.204801	1.54376	LOC103421267; LOC103424200; LOC103427603; LOC103439450; LOC103440761; LOC103445990; LOC103455826
GO:0015297	antiporter activity	molecular_function	22	3500	123	25472	0.0749362	0.207429	1.3017	LOC103402630; LOC103402920; LOC103403071; LOC103405169; LOC103410500; LOC103415446; LOC103416028; LOC103416598; LOC103420193; LOC103428479; LOC103433696; LOC103441751; LOC103442922; LOC103443008; LOC103446715; LOC103448048; LOC103449341; LOC103450143; LOC103451334; LOC114819949; LOC114821660; LOC114824779
GO:0051603	proteolysis involved in cellular protein catabolic process	biological_process	16	3500	86	25472	0.0756865	0.209342	1.35399	LOC103400282; LOC103400937; LOC103405696; LOC103407786; LOC103414835; LOC103421060; LOC103423727; LOC103432412; LOC103433178; LOC103438456; LOC103441946; LOC103445495; LOC103448027; LOC103451125; LOC103452480; LOC103453996
GO:0043231	intracellular membrane-bounded organelle	cellular_component	29	3500	168	25472	0.0780834	0.215802	1.25627	LOC103400658; LOC103404501; LOC103406365; LOC103406819; LOC103409460; LOC103410304; LOC103412684; LOC103412791; LOC103418074; LOC103426549; LOC103429051; LOC103435020; LOC103435175; LOC103435654; LOC103437871; LOC103438057; LOC103441459; LOC103443396; LOC103447313; LOC103447482; LOC103447532; LOC103447605; LOC103449486; LOC103451728; LOC108169224; LOC108169239; LOC114824117; LOC114824505; LOC1148…
GO:0010492	maintenance of shoot apical meristem identity	biological_process	6	3500	28	25472	0.0797662	0.216496	1.55951	LOC103404939; LOC103419795; LOC103419892; LOC103424515; LOC103445622; LOC103451783
GO:0080092	regulation of pollen tube growth	biological_process	9	3500	45	25472	0.0812204	0.216496	1.45554	LOC103409419; LOC103416548; LOC103428835; LOC103437827; LOC103440210; LOC103443794; LOC103449565; LOC103451976; LOC114824866
GO:0005351	carbohydrate:proton symporter activity	molecular_function	13	3500	69	25472	0.0844797	0.216496	1.37116	LOC103401649; LOC103421347; LOC103421939; LOC103422718; LOC103423566; LOC103426288; LOC103432469; LOC103444121; LOC103445287; LOC103449824; LOC103449825; LOC103449826; SOT2
GO:0005355	glucose transmembrane transporter activity	molecular_function	13	3500	69	25472	0.0844797	0.216496	1.37116	LOC103401649; LOC103421347; LOC103421939; LOC103422718; LOC103423566; LOC103426288; LOC103432469; LOC103444121; LOC103445287; LOC103449824; LOC103449825; LOC103449826; SOT2
GO:0008645	hexose transmembrane transport	biological_process	13	3500	69	25472	0.0844797	0.216496	1.37116	LOC103401649; LOC103421347; LOC103421939; LOC103422718; LOC103423566; LOC103426288; LOC103432469; LOC103444121; LOC103445287; LOC103449824; LOC103449825; LOC103449826; SOT2
GO:0015995	chlorophyll biosynthetic process	biological_process	12	3500	63	25472	0.084513	0.216496	1.38623	LOC103414031; LOC103416790; LOC103431022; LOC103432719; LOC103434746; LOC103435793; LOC103437685; LOC103441572; LOC103441948; LOC103446447; LOC103456287; LOC114822994
GO:0010067	procambium histogenesis	biological_process	2	3500	8	25472	0.0850714	0.216496	1.81943	BZIP18; LOC103441156
GO:0042995	cell projection	cellular_component	2	3500	8	25472	0.0850714	0.216496	1.81943	LOC103400057; LOC103402341
GO:0034968	histone lysine methylation	biological_process	2	3500	8	25472	0.0850714	0.216496	1.81943	LOC103402019; LOC103428212
GO:0045088	regulation of innate immune response	biological_process	2	3500	8	25472	0.0850714	0.216496	1.81943	LOC103402819; LOC103450230
GO:0006379	mRNA cleavage	biological_process	2	3500	8	25472	0.0850714	0.216496	1.81943	LOC103403551; LOC103437386
GO:0004143	diacylglycerol kinase activity	molecular_function	2	3500	8	25472	0.0850714	0.216496	1.81943	LOC103403751; LOC103428056
GO:0004596	peptide alpha-N-acetyltransferase activity	molecular_function	2	3500	8	25472	0.0850714	0.216496	1.81943	LOC103404133; LOC103440020
GO:0009725	response to hormone	biological_process	2	3500	8	25472	0.0850714	0.216496	1.81943	LOC103404294; LOC114820984
GO:0045488	pectin metabolic process	biological_process	2	3500	8	25472	0.0850714	0.216496	1.81943	LOC103405011; LOC114826808
GO:0004617	phosphoglycerate dehydrogenase activity	molecular_function	2	3500	8	25472	0.0850714	0.216496	1.81943	LOC103405207; LOC103420664
GO:0006103	2-oxoglutarate metabolic process	biological_process	2	3500	8	25472	0.0850714	0.216496	1.81943	LOC103405859; LOC103406342
GO:1900424	regulation of defense response to bacterium	biological_process	2	3500	8	25472	0.0850714	0.216496	1.81943	LOC103405870; LOC103413400
GO:0006544	glycine metabolic process	biological_process	2	3500	8	25472	0.0850714	0.216496	1.81943	LOC103405877; LOC103443414
GO:0006565	L-serine catabolic process	biological_process	2	3500	8	25472	0.0850714	0.216496	1.81943	LOC103405877; LOC103443414
GO:0070905	serine binding	molecular_function	2	3500	8	25472	0.0850714	0.216496	1.81943	LOC103405877; LOC103443414
GO:1904482	cellular response to tetrahydrofolate	biological_process	2	3500	8	25472	0.0850714	0.216496	1.81943	LOC103405877; LOC103443414
GO:0010233	phloem transport	biological_process	2	3500	8	25472	0.0850714	0.216496	1.81943	LOC103406741; LOC103424190
GO:0043447	alkane biosynthetic process	biological_process	2	3500	8	25472	0.0850714	0.216496	1.81943	LOC103406883; LOC114820584
GO:0005797	Golgi medial cisterna	cellular_component	2	3500	8	25472	0.0850714	0.216496	1.81943	LOC103407929; LOC103448450
GO:0031204	posttranslational protein targeting to membrane, translocation	biological_process	2	3500	8	25472	0.0850714	0.216496	1.81943	LOC103407929; LOC103448450
GO:0032869	cellular response to insulin stimulus	biological_process	2	3500	8	25472	0.0850714	0.216496	1.81943	LOC103408335; LOC103414179
GO:0005496	steroid binding	molecular_function	2	3500	8	25472	0.0850714	0.216496	1.81943	LOC103410973; LOC103440517
GO:0016531	copper chaperone activity	molecular_function	2	3500	8	25472	0.0850714	0.216496	1.81943	LOC103411985; LOC103452771
GO:0055070	copper ion homeostasis	biological_process	2	3500	8	25472	0.0850714	0.216496	1.81943	LOC103411985; LOC103452771
GO:0071897	DNA biosynthetic process	biological_process	2	3500	8	25472	0.0850714	0.216496	1.81943	LOC103413077; LOC103448688
GO:0002084	protein depalmitoylation	biological_process	2	3500	8	25472	0.0850714	0.216496	1.81943	LOC103417377; LOC103440702
GO:0008474	palmitoyl-(protein) hydrolase activity	molecular_function	2	3500	8	25472	0.0850714	0.216496	1.81943	LOC103417377; LOC103440702
GO:0004612	phosphoenolpyruvate carboxykinase (ATP) activity	molecular_function	2	3500	8	25472	0.0850714	0.216496	1.81943	LOC103417933; LOC103447019
GO:1990269	RNA polymerase II C-terminal domain phosphoserine binding	molecular_function	2	3500	8	25472	0.0850714	0.216496	1.81943	LOC103419513; LOC114825017
GO:0019287	isopentenyl diphosphate biosynthetic process, mevalonate pathway	biological_process	2	3500	8	25472	0.0850714	0.216496	1.81943	LOC103420566; LOC103429390
GO:0008568	microtubule-severing ATPase activity	molecular_function	2	3500	8	25472	0.0850714	0.216496	1.81943	LOC103421447; LOC103446184
GO:0009875	pollen-pistil interaction	biological_process	2	3500	8	25472	0.0850714	0.216496	1.81943	LOC103425348; LOC103444234
GO:0008964	phosphoenolpyruvate carboxylase activity	molecular_function	2	3500	8	25472	0.0850714	0.216496	1.81943	LOC103431561; LOC103451698
GO:0015977	carbon fixation	biological_process	2	3500	8	25472	0.0850714	0.216496	1.81943	LOC103431561; LOC103451698
GO:0008615	pyridoxine biosynthetic process	biological_process	2	3500	8	25472	0.0850714	0.216496	1.81943	LOC103433606; LOC103452951
GO:0005094	Rho GDP-dissociation inhibitor activity	molecular_function	2	3500	8	25472	0.0850714	0.216496	1.81943	LOC103435740; LOC103445588
GO:0006850	mitochondrial pyruvate transmembrane transport	biological_process	2	3500	8	25472	0.0850714	0.216496	1.81943	LOC103437886; LOC103455024
GO:0008798	beta-aspartyl-peptidase activity	molecular_function	2	3500	8	25472	0.0850714	0.216496	1.81943	LOC103439600; LOC114826649
GO:0010277	chlorophyllide a oxygenase [overall] activity	molecular_function	2	3500	8	25472	0.0850714	0.216496	1.81943	LOC103441572; LOC103442385
GO:0080177	plastoglobule organization	biological_process	2	3500	8	25472	0.0850714	0.216496	1.81943	LOC103442465; LOC103456109
GO:1990748	cellular detoxification	biological_process	2	3500	8	25472	0.0850714	0.216496	1.81943	LOC103443458; LOC114824999
GO:0000293	ferric-chelate reductase activity	molecular_function	2	3500	8	25472	0.0850714	0.216496	1.81943	LOC103456307; LOC114822770
GO:0008361	regulation of cell size	biological_process	5	3500	23	25472	0.0853455	0.216496	1.58211	LOC103402628; LOC103404434; LOC103405234; LOC103437322; LOC103442343
GO:0044255	cellular lipid metabolic process	biological_process	5	3500	23	25472	0.0853455	0.216496	1.58211	LOC103408102; LOC103421585; LOC103421684; LOC103424227; LOC103442731
GO:0009116	nucleoside metabolic process	biological_process	5	3500	23	25472	0.0853455	0.216496	1.58211	LOC103415462; LOC103416597; LOC103422017; LOC103431322; LOC103451518
GO:0006261	DNA-dependent DNA replication	biological_process	8	3500	40	25472	0.0892938	0.216496	1.45554	LOC103406461; LOC103432731; LOC103432923; LOC103438345; LOC103441543; LOC103455051; LOC103455456; LOC108174052
GO:0015386	potassium:proton antiporter activity	molecular_function	4	3500	18	25472	0.089879	0.216496	1.61727	LOC103408100; LOC103409678; LOC103436871; LOC103439264
GO:0009407	toxin catabolic process	biological_process	4	3500	18	25472	0.089879	0.216496	1.61727	LOC103432314; LOC103436762; LOC103451886; LOC103452346
GO:0006000	fructose metabolic process	biological_process	4	3500	18	25472	0.089879	0.216496	1.61727	LOC103435411; LOC103439109; LOC103439933; LOC114824331
GO:0008378	galactosyltransferase activity	molecular_function	4	3500	18	25472	0.089879	0.216496	1.61727	LOC103439678; LOC103442612; LOC103455827; LOC114824005
GO:0005354	galactose transmembrane transporter activity	molecular_function	4	3500	18	25472	0.089879	0.216496	1.61727	LOC103449824; LOC103449825; LOC103449826; SOT2
GO:1904143	positive regulation of carotenoid biosynthetic process	biological_process	3	3500	13	25472	0.0915015	0.216496	1.67947	LOC103400029; LOC103424158; LOC103456109
GO:0030151	molybdenum ion binding	molecular_function	3	3500	13	25472	0.0915015	0.216496	1.67947	LOC103401883; LOC103439424; LOC103440026
GO:0001872	(1->3)-beta-D-glucan binding	molecular_function	3	3500	13	25472	0.0915015	0.216496	1.67947	LOC103402825; LOC103431198; LOC114819137
GO:0009913	epidermal cell differentiation	biological_process	3	3500	13	25472	0.0915015	0.216496	1.67947	LOC103403150; LOC103431926; LOC103439980
GO:0008239	dipeptidyl-peptidase activity	molecular_function	3	3500	13	25472	0.0915015	0.216496	1.67947	LOC103413500; LOC108175038; LOC114821538
GO:0000050	urea cycle	biological_process	3	3500	13	25472	0.0915015	0.216496	1.67947	LOC103413684; LOC103426874; LOC103449463
GO:0004673	protein histidine kinase activity	molecular_function	3	3500	13	25472	0.0915015	0.216496	1.67947	LOC103416597; LOC103422017; LOC103451518
GO:0032050	clathrin heavy chain binding	molecular_function	3	3500	13	25472	0.0915015	0.216496	1.67947	LOC103419217; LOC103437167; LOC114824725
GO:0010019	chloroplast-nucleus signaling pathway	biological_process	3	3500	13	25472	0.0915015	0.216496	1.67947	LOC103419795; LOC103432719; LOC103448109
GO:0022841	potassium ion leak channel activity	molecular_function	3	3500	13	25472	0.0915015	0.216496	1.67947	LOC103427530; LOC103446212; LOC114819988
GO:0044209	AMP salvage	biological_process	3	3500	13	25472	0.0915015	0.216496	1.67947	LOC103428644; LOC103444025; LOC103456217
GO:0047627	adenylylsulfatase activity	molecular_function	3	3500	13	25472	0.0915015	0.216496	1.67947	LOC103436413; LOC108174913; LOC114819943
GO:0042372	phylloquinone biosynthetic process	biological_process	3	3500	13	25472	0.0915015	0.216496	1.67947	LOC103437799; LOC103444873; LOC103446111
GO:0045145	single-stranded DNA 5'-3' exodeoxyribonuclease activity	molecular_function	3	3500	13	25472	0.0915015	0.216496	1.67947	LOC103438958; LOC103450031; LOC114821985
GO:0048364	root development	biological_process	37	3500	223	25472	0.0927313	0.216496	1.20751	LOC103400855; LOC103402598; LOC103403054; LOC103403751; LOC103403905; LOC103404434; LOC103405234; LOC103405483; LOC103406265; LOC103409912; LOC103409996; LOC103410572; LOC103412703; LOC103413400; LOC103418494; LOC103419738; LOC103422586; LOC103424563; LOC103426347; LOC103426545; LOC103427511; LOC103435071; LOC103435518; LOC103437322; LOC103439873; LOC103439980; LOC103442343; LOC103444473; LOC1034…
GO:0010286	heat acclimation	biological_process	10	3500	52	25472	0.0928743	0.216496	1.39956	LOC103403720; LOC103405620; LOC103406608; LOC103435009; LOC103435168; LOC103439888; LOC103451145; LOC114819106; LOC114824490; LOC114827637
GO:0015020	glucuronosyltransferase activity	molecular_function	6	3500	29	25472	0.0932425	0.216496	1.50573	LOC103400428; LOC103405225; LOC103423642; LOC103430432; LOC103448686; LOC103449357
GO:0030553	cGMP binding	molecular_function	12	3500	64	25472	0.0933427	0.216496	1.36457	LOC103409099; LOC103414450; LOC103426741; LOC103429045; LOC103438334; LOC103438443; LOC103439360; LOC103439584; LOC103442270; LOC103443501; LOC103443879; LOC114825592
GO:0009651	response to salt stress	biological_process	105	3500	682	25472	0.0933965	0.216496	1.12047	LOC103400515; LOC103400659; LOC103400926; LOC103401648; LOC103403426; LOC103403536; LOC103403867; LOC103405428; LOC103405696; LOC103405974; LOC103406285; LOC103406608; LOC103408100; LOC103410642; LOC103410709; LOC103411183; LOC103411570; LOC103413424; LOC103413791; LOC103413793; LOC103415011; LOC103415256; LOC103415513; LOC103415754; LOC103416597; LOC103416985; LOC103417569; LOC103417731; LOC1034…
GO:0046345	abscisic acid catabolic process	biological_process	1	3500	4	25472	0.0935832	0.216496	1.81943	CYP707A
GO:0010151	chloroplast elongation	biological_process	1	3500	4	25472	0.0935832	0.216496	1.81943	GATA5
GO:0043610	regulation of carbohydrate utilization	biological_process	1	3500	4	25472	0.0935832	0.216496	1.81943	GATA5
GO:0080050	regulation of seed development	biological_process	1	3500	4	25472	0.0935832	0.216496	1.81943	GATA5
GO:2000001	regulation of DNA damage checkpoint	biological_process	1	3500	4	25472	0.0935832	0.216496	1.81943	LOC103400021
GO:0046473	phosphatidic acid metabolic process	biological_process	1	3500	4	25472	0.0935832	0.216496	1.81943	LOC103401038
GO:0070192	chromosome organization involved in meiotic cell cycle	biological_process	1	3500	4	25472	0.0935832	0.216496	1.81943	LOC103401937
GO:0051170	import into nucleus	biological_process	1	3500	4	25472	0.0935832	0.216496	1.81943	LOC103402159
GO:0004714	transmembrane receptor protein tyrosine kinase activity	molecular_function	1	3500	4	25472	0.0935832	0.216496	1.81943	LOC103402202
GO:0017046	peptide hormone binding	molecular_function	1	3500	4	25472	0.0935832	0.216496	1.81943	LOC103402202
GO:0090548	response to nitrate starvation	biological_process	1	3500	4	25472	0.0935832	0.216496	1.81943	LOC103402202
GO:0012506	vesicle membrane	cellular_component	1	3500	4	25472	0.0935832	0.216496	1.81943	LOC103402598
GO:0031567	mitotic cell size control checkpoint	biological_process	1	3500	4	25472	0.0935832	0.216496	1.81943	LOC103402628
GO:0031417	NatC complex	cellular_component	1	3500	4	25472	0.0935832	0.216496	1.81943	LOC103404133
GO:0033306	phytol metabolic process	biological_process	1	3500	4	25472	0.0935832	0.216496	1.81943	LOC103404163
GO:0004034	aldose 1-epimerase activity	molecular_function	1	3500	4	25472	0.0935832	0.216496	1.81943	LOC103404424
GO:0019318	hexose metabolic process	biological_process	1	3500	4	25472	0.0935832	0.216496	1.81943	LOC103404424
GO:0010296	prenylcysteine methylesterase activity	molecular_function	1	3500	4	25472	0.0935832	0.216496	1.81943	LOC103404698
GO:1990575	mitochondrial L-ornithine transmembrane transport	biological_process	1	3500	4	25472	0.0935832	0.216496	1.81943	LOC103404777
GO:0006384	transcription initiation from RNA polymerase III promoter	biological_process	1	3500	4	25472	0.0935832	0.216496	1.81943	LOC103405186
GO:0043425	bHLH transcription factor binding	molecular_function	1	3500	4	25472	0.0935832	0.216496	1.81943	LOC103405327
GO:0046715	active borate transmembrane transporter activity	molecular_function	1	3500	4	25472	0.0935832	0.216496	1.81943	LOC103406473
GO:0006808	regulation of nitrogen utilization	biological_process	1	3500	4	25472	0.0935832	0.216496	1.81943	LOC103406741
GO:1903508	positive regulation of nucleic acid-templated transcription	biological_process	1	3500	4	25472	0.0935832	0.216496	1.81943	LOC103406741
GO:0090239	regulation of histone H4 acetylation	biological_process	1	3500	4	25472	0.0935832	0.216496	1.81943	LOC103407080
GO:0032259	methylation	biological_process	1	3500	4	25472	0.0935832	0.216496	1.81943	LOC103407349
GO:0006516	glycoprotein catabolic process	biological_process	1	3500	4	25472	0.0935832	0.216496	1.81943	LOC103407787
GO:0018315	molybdenum incorporation into molybdenum-molybdopterin complex	biological_process	1	3500	4	25472	0.0935832	0.216496	1.81943	LOC103407849
GO:0003825	alpha,alpha-trehalose-phosphate synthase (UDP-forming) activity	molecular_function	1	3500	4	25472	0.0935832	0.216496	1.81943	LOC103408057
GO:0045300	acyl-[acyl-carrier-protein] desaturase activity	molecular_function	1	3500	4	25472	0.0935832	0.216496	1.81943	LOC103408191
GO:0102786	stearoyl-[acp] desaturase activity	molecular_function	1	3500	4	25472	0.0935832	0.216496	1.81943	LOC103408191
GO:0050307	sucrose-phosphate phosphatase activity	molecular_function	1	3500	4	25472	0.0935832	0.216496	1.81943	LOC103408838
GO:2000122	negative regulation of stomatal complex development	biological_process	1	3500	4	25472	0.0935832	0.216496	1.81943	LOC103409241
GO:0071034	CUT catabolic process	biological_process	1	3500	4	25472	0.0935832	0.216496	1.81943	LOC103409717
GO:0071049	nuclear retention of pre-mRNA with aberrant 3'-ends at the site of transcription	biological_process	1	3500	4	25472	0.0935832	0.216496	1.81943	LOC103409717
GO:0003796	lysozyme activity	molecular_function	1	3500	4	25472	0.0935832	0.216496	1.81943	LOC103409997
GO:0080045	quercetin 3'-O-glucosyltransferase activity	molecular_function	1	3500	4	25472	0.0935832	0.216496	1.81943	LOC103410304
GO:0035264	multicellular organism growth	biological_process	1	3500	4	25472	0.0935832	0.216496	1.81943	LOC103410709
GO:0004791	thioredoxin-disulfide reductase activity	molecular_function	1	3500	4	25472	0.0935832	0.216496	1.81943	LOC103411276
GO:0008276	protein methyltransferase activity	molecular_function	1	3500	4	25472	0.0935832	0.216496	1.81943	LOC103412304
GO:0006799	polyphosphate biosynthetic process	biological_process	1	3500	4	25472	0.0935832	0.216496	1.81943	LOC103412500
GO:0048016	inositol phosphate-mediated signaling	biological_process	1	3500	4	25472	0.0935832	0.216496	1.81943	LOC103412500
GO:0010425	DNA methylation on cytosine within a CNG sequence	biological_process	1	3500	4	25472	0.0935832	0.216496	1.81943	LOC103412678
GO:0003910	DNA ligase (ATP) activity	molecular_function	1	3500	4	25472	0.0935832	0.216496	1.81943	LOC103413077
GO:0051103	DNA ligation involved in DNA repair	biological_process	1	3500	4	25472	0.0935832	0.216496	1.81943	LOC103413077
GO:0050992	dimethylallyl diphosphate biosynthetic process	biological_process	1	3500	4	25472	0.0935832	0.216496	1.81943	LOC103414031
GO:0051650	establishment of vesicle localization	biological_process	1	3500	4	25472	0.0935832	0.216496	1.81943	LOC103414741
GO:0006641	triglyceride metabolic process	biological_process	1	3500	4	25472	0.0935832	0.216496	1.81943	LOC103415051
GO:1903052	positive regulation of proteolysis involved in cellular protein catabolic process	biological_process	1	3500	4	25472	0.0935832	0.216496	1.81943	LOC103415312
GO:0046509	1,2-diacylglycerol 3-beta-galactosyltransferase activity	molecular_function	1	3500	4	25472	0.0935832	0.216496	1.81943	LOC103417972
GO:0050275	scopoletin glucosyltransferase activity	molecular_function	1	3500	4	25472	0.0935832	0.216496	1.81943	LOC103418352
GO:0044547	DNA topoisomerase binding	molecular_function	1	3500	4	25472	0.0935832	0.216496	1.81943	LOC103418804
GO:0072587	DNA topoisomerase (ATP-hydrolyzing) activator activity	molecular_function	1	3500	4	25472	0.0935832	0.216496	1.81943	LOC103418804
GO:0000494	box C/D snoRNA 3'-end processing	biological_process	1	3500	4	25472	0.0935832	0.216496	1.81943	LOC103419076
GO:0008649	rRNA methyltransferase activity	molecular_function	1	3500	4	25472	0.0935832	0.216496	1.81943	LOC103419076
GO:1990258	histone glutamine methylation	biological_process	1	3500	4	25472	0.0935832	0.216496	1.81943	LOC103419076
GO:1990259	histone-glutamine methyltransferase activity	molecular_function	1	3500	4	25472	0.0935832	0.216496	1.81943	LOC103419076
GO:1990570	GDP-mannose transmembrane transport	biological_process	1	3500	4	25472	0.0935832	0.216496	1.81943	LOC103420193
GO:0005090	Sar guanyl-nucleotide exchange factor activity	molecular_function	1	3500	4	25472	0.0935832	0.216496	1.81943	LOC103420592
GO:0003905	alkylbase DNA N-glycosylase activity	molecular_function	1	3500	4	25472	0.0935832	0.216496	1.81943	LOC103420942
GO:0006285	base-excision repair, AP site formation	biological_process	1	3500	4	25472	0.0935832	0.216496	1.81943	LOC103420942
GO:0008725	DNA-3-methyladenine glycosylase activity	molecular_function	1	3500	4	25472	0.0935832	0.216496	1.81943	LOC103420942
GO:0043916	DNA-7-methylguanine glycosylase activity	molecular_function	1	3500	4	25472	0.0935832	0.216496	1.81943	LOC103420942
GO:0052821	DNA-7-methyladenine glycosylase activity	molecular_function	1	3500	4	25472	0.0935832	0.216496	1.81943	LOC103420942
GO:0052822	DNA-3-methylguanine glycosylase activity	molecular_function	1	3500	4	25472	0.0935832	0.216496	1.81943	LOC103420942
GO:0016295	myristoyl-[acyl-carrier-protein] hydrolase activity	molecular_function	1	3500	4	25472	0.0935832	0.216496	1.81943	LOC103421049
GO:0016296	palmitoyl-[acyl-carrier-protein] hydrolase activity	molecular_function	1	3500	4	25472	0.0935832	0.216496	1.81943	LOC103421049
GO:0033550	MAP kinase tyrosine phosphatase activity	molecular_function	1	3500	4	25472	0.0935832	0.216496	1.81943	LOC103421927
GO:0003977	UDP-N-acetylglucosamine diphosphorylase activity	molecular_function	1	3500	4	25472	0.0935832	0.216496	1.81943	LOC103422295
GO:0010589	leaf proximal/distal pattern formation	biological_process	1	3500	4	25472	0.0935832	0.216496	1.81943	LOC103422322
GO:0080153	negative regulation of reductive pentose-phosphate cycle	biological_process	1	3500	4	25472	0.0935832	0.216496	1.81943	LOC103423136
GO:0000254	C-4 methylsterol oxidase activity	molecular_function	1	3500	4	25472	0.0935832	0.216496	1.81943	LOC103423556
GO:0010331	gibberellin binding	molecular_function	1	3500	4	25472	0.0935832	0.216496	1.81943	LOC103423570
GO:0042351	'de novo' GDP-L-fucose biosynthetic process	biological_process	1	3500	4	25472	0.0935832	0.216496	1.81943	LOC103424268
GO:0034595	phosphatidylinositol phosphate 5-phosphatase activity	molecular_function	1	3500	4	25472	0.0935832	0.216496	1.81943	LOC103424617
GO:2000369	regulation of clathrin-dependent endocytosis	biological_process	1	3500	4	25472	0.0935832	0.216496	1.81943	LOC103424617
GO:0004324	ferredoxin-NADP+ reductase activity	molecular_function	1	3500	4	25472	0.0935832	0.216496	1.81943	LOC103425043
GO:0032366	intracellular sterol transport	biological_process	1	3500	4	25472	0.0935832	0.216496	1.81943	LOC103425365
GO:0052658	inositol-1,4,5-trisphosphate 5-phosphatase activity	molecular_function	1	3500	4	25472	0.0935832	0.216496	1.81943	LOC103426545
GO:0042255	ribosome assembly	biological_process	1	3500	4	25472	0.0935832	0.216496	1.81943	LOC103427371
GO:0009961	response to 1-aminocyclopropane-1-carboxylic acid	biological_process	1	3500	4	25472	0.0935832	0.216496	1.81943	LOC103427842
GO:0031262	Ndc80 complex	cellular_component	1	3500	4	25472	0.0935832	0.216496	1.81943	LOC103428287
GO:0048476	Holliday junction resolvase complex	cellular_component	1	3500	4	25472	0.0935832	0.216496	1.81943	LOC103428449
GO:0017151	DEAD/H-box RNA helicase binding	molecular_function	1	3500	4	25472	0.0935832	0.216496	1.81943	LOC103428569
GO:0010142	farnesyl diphosphate biosynthetic process, mevalonate pathway	biological_process	1	3500	4	25472	0.0935832	0.216496	1.81943	LOC103429390
GO:0010279	indole-3-acetic acid amido synthetase activity	molecular_function	1	3500	4	25472	0.0935832	0.216496	1.81943	LOC103429570
GO:0010542	nitrate efflux transmembrane transporter activity	molecular_function	1	3500	4	25472	0.0935832	0.216496	1.81943	LOC103429586
GO:2000785	regulation of autophagosome assembly	biological_process	1	3500	4	25472	0.0935832	0.216496	1.81943	LOC103431634
GO:0003983	UTP:glucose-1-phosphate uridylyltransferase activity	molecular_function	1	3500	4	25472	0.0935832	0.216496	1.81943	LOC103432313
GO:0006011	UDP-glucose metabolic process	biological_process	1	3500	4	25472	0.0935832	0.216496	1.81943	LOC103432313
GO:0018022	peptidyl-lysine methylation	biological_process	1	3500	4	25472	0.0935832	0.216496	1.81943	LOC103433171
GO:0046974	histone methyltransferase activity (H3-K9 specific)	molecular_function	1	3500	4	25472	0.0935832	0.216496	1.81943	LOC103433171
GO:0048250	iron import into the mitochondrion	biological_process	1	3500	4	25472	0.0935832	0.216496	1.81943	LOC103433684
GO:0008891	glycolate oxidase activity	molecular_function	1	3500	4	25472	0.0935832	0.216496	1.81943	LOC103435003
GO:0045806	negative regulation of endocytosis	biological_process	1	3500	4	25472	0.0935832	0.216496	1.81943	LOC103435175
GO:1900186	negative regulation of clathrin-dependent endocytosis	biological_process	1	3500	4	25472	0.0935832	0.216496	1.81943	LOC103435175
GO:0030388	fructose 1,6-bisphosphate metabolic process	biological_process	1	3500	4	25472	0.0935832	0.216496	1.81943	LOC103435411
GO:0010313	phytochrome binding	molecular_function	1	3500	4	25472	0.0935832	0.216496	1.81943	LOC103435793
GO:0101030	tRNA-guanine transglycosylation	biological_process	1	3500	4	25472	0.0935832	0.216496	1.81943	LOC103436462
GO:0033743	peptide-methionine (R)-S-oxide reductase activity	molecular_function	1	3500	4	25472	0.0935832	0.216496	1.81943	LOC103436573
GO:0015193	L-proline transmembrane transporter activity	molecular_function	1	3500	4	25472	0.0935832	0.216496	1.81943	LOC103437650
GO:0098505	G-rich strand telomeric DNA binding	molecular_function	1	3500	4	25472	0.0935832	0.216496	1.81943	LOC103438243
GO:0031860	telomeric 3' overhang formation	biological_process	1	3500	4	25472	0.0935832	0.216496	1.81943	LOC103438958
GO:0043142	single-stranded DNA-dependent ATPase activity	molecular_function	1	3500	4	25472	0.0935832	0.216496	1.81943	LOC103438958
GO:0000967	rRNA 5'-end processing	biological_process	1	3500	4	25472	0.0935832	0.216496	1.81943	LOC103439242
GO:0016071	mRNA metabolic process	biological_process	1	3500	4	25472	0.0935832	0.216496	1.81943	LOC103439800
GO:0030795	jasmonate O-methyltransferase activity	molecular_function	1	3500	4	25472	0.0935832	0.216496	1.81943	LOC103440310
GO:0102078	methyl jasmonate methylesterase activity	molecular_function	1	3500	4	25472	0.0935832	0.216496	1.81943	LOC103440310
GO:0045876	positive regulation of sister chromatid cohesion	biological_process	1	3500	4	25472	0.0935832	0.216496	1.81943	LOC103441913
GO:2000114	regulation of establishment of cell polarity	biological_process	1	3500	4	25472	0.0935832	0.216496	1.81943	LOC103441913
GO:0046608	carotenoid isomerase activity	molecular_function	1	3500	4	25472	0.0935832	0.216496	1.81943	LOC103441970
GO:0015184	L-cystine transmembrane transporter activity	molecular_function	1	3500	4	25472	0.0935832	0.216496	1.81943	LOC103442181
GO:0015811	L-cystine transport	biological_process	1	3500	4	25472	0.0935832	0.216496	1.81943	LOC103442181
GO:0010275	NAD(P)H dehydrogenase complex assembly	biological_process	1	3500	4	25472	0.0935832	0.216496	1.81943	LOC103442427
GO:0047334	diphosphate-fructose-6-phosphate 1-phosphotransferase activity	molecular_function	1	3500	4	25472	0.0935832	0.216496	1.81943	LOC103442637
GO:0006821	chloride transport	biological_process	1	3500	4	25472	0.0935832	0.216496	1.81943	LOC103443285
GO:0015271	outward rectifier potassium channel activity	molecular_function	1	3500	4	25472	0.0935832	0.216496	1.81943	LOC103444359
GO:0004326	tetrahydrofolylpolyglutamate synthase activity	molecular_function	1	3500	4	25472	0.0935832	0.216496	1.81943	LOC103444473
GO:0046488	phosphatidylinositol metabolic process	biological_process	1	3500	4	25472	0.0935832	0.216496	1.81943	LOC103444583
GO:0004180	carboxypeptidase activity	molecular_function	1	3500	4	25472	0.0935832	0.216496	1.81943	LOC103445495
GO:1903293	phosphatase complex	cellular_component	1	3500	4	25472	0.0935832	0.216496	1.81943	LOC103446261
GO:0004823	leucine-tRNA ligase activity	molecular_function	1	3500	4	25472	0.0935832	0.216496	1.81943	LOC103446741
GO:0006429	leucyl-tRNA aminoacylation	biological_process	1	3500	4	25472	0.0935832	0.216496	1.81943	LOC103446741
GO:0052631	sphingolipid delta-8 desaturase activity	molecular_function	1	3500	4	25472	0.0935832	0.216496	1.81943	LOC103447141
GO:0000311	plastid large ribosomal subunit	cellular_component	1	3500	4	25472	0.0935832	0.216496	1.81943	LOC103448040
GO:0010973	positive regulation of division septum assembly	biological_process	1	3500	4	25472	0.0935832	0.216496	1.81943	LOC103448510
GO:0004797	thymidine kinase activity	molecular_function	1	3500	4	25472	0.0935832	0.216496	1.81943	LOC103448688
GO:0046104	thymidine metabolic process	biological_process	1	3500	4	25472	0.0935832	0.216496	1.81943	LOC103448688
GO:0016790	thiolester hydrolase activity	molecular_function	1	3500	4	25472	0.0935832	0.216496	1.81943	LOC103448739
GO:0015117	thiosulfate transmembrane transporter activity	molecular_function	1	3500	4	25472	0.0935832	0.216496	1.81943	LOC103449341
GO:0015709	thiosulfate transport	biological_process	1	3500	4	25472	0.0935832	0.216496	1.81943	LOC103449341
GO:0071422	succinate transmembrane transport	biological_process	1	3500	4	25472	0.0935832	0.216496	1.81943	LOC103449341
GO:0015410	manganese-transporting ATPase activity	molecular_function	1	3500	4	25472	0.0935832	0.216496	1.81943	LOC103449500
GO:0008962	phosphatidylglycerophosphatase activity	molecular_function	1	3500	4	25472	0.0935832	0.216496	1.81943	LOC103449848
GO:0004042	acetyl-CoA:L-glutamate N-acetyltransferase activity	molecular_function	1	3500	4	25472	0.0935832	0.216496	1.81943	LOC103450205
GO:0103045	methione N-acyltransferase activity	molecular_function	1	3500	4	25472	0.0935832	0.216496	1.81943	LOC103450205
GO:0032447	protein urmylation	biological_process	1	3500	4	25472	0.0935832	0.216496	1.81943	LOC103450332
GO:0070207	protein homotrimerization	biological_process	1	3500	4	25472	0.0935832	0.216496	1.81943	LOC103450460
GO:1902884	positive regulation of response to oxidative stress	biological_process	1	3500	4	25472	0.0935832	0.216496	1.81943	LOC103451145
GO:0008835	diaminohydroxyphosphoribosylaminopyrimidine deaminase activity	molecular_function	1	3500	4	25472	0.0935832	0.216496	1.81943	LOC103451152
GO:0048017	inositol lipid-mediated signaling	biological_process	1	3500	4	25472	0.0935832	0.216496	1.81943	LOC103451296
GO:0048598	embryonic morphogenesis	biological_process	1	3500	4	25472	0.0935832	0.216496	1.81943	LOC103451392
GO:0006747	FAD biosynthetic process	biological_process	1	3500	4	25472	0.0935832	0.216496	1.81943	LOC103451442
GO:0016209	antioxidant activity	molecular_function	1	3500	4	25472	0.0935832	0.216496	1.81943	LOC103451722
GO:0035195	gene silencing by miRNA	biological_process	1	3500	4	25472	0.0935832	0.216496	1.81943	LOC103451783
GO:0017017	MAP kinase tyrosine/serine/threonine phosphatase activity	molecular_function	1	3500	4	25472	0.0935832	0.216496	1.81943	LOC103452043
GO:0004123	cystathionine gamma-lyase activity	molecular_function	1	3500	4	25472	0.0935832	0.216496	1.81943	LOC103452551
GO:0018826	methionine gamma-lyase activity	molecular_function	1	3500	4	25472	0.0935832	0.216496	1.81943	LOC103452551
GO:0019458	methionine catabolic process via 2-oxobutanoate	biological_process	1	3500	4	25472	0.0935832	0.216496	1.81943	LOC103452551
GO:0009916	alternative oxidase activity	molecular_function	1	3500	4	25472	0.0935832	0.216496	1.81943	LOC103453652
GO:0102721	ubiquinol:oxygen oxidoreductase activity	molecular_function	1	3500	4	25472	0.0935832	0.216496	1.81943	LOC103453652
GO:0009915	phloem sucrose loading	biological_process	1	3500	4	25472	0.0935832	0.216496	1.81943	LOC103453843
GO:0010434	bract formation	biological_process	1	3500	4	25472	0.0935832	0.216496	1.81943	LOC103454562
GO:0019825	oxygen binding	molecular_function	1	3500	4	25472	0.0935832	0.216496	1.81943	LOC103456053
GO:1902446	regulation of shade avoidance	biological_process	1	3500	4	25472	0.0935832	0.216496	1.81943	LOC108169236
GO:0017198	N-terminal peptidyl-serine acetylation	biological_process	1	3500	4	25472	0.0935832	0.216496	1.81943	LOC108171391
GO:0009842	cyanelle	cellular_component	1	3500	4	25472	0.0935832	0.216496	1.81943	LOC108173038
GO:1902969	mitotic DNA replication	biological_process	1	3500	4	25472	0.0935832	0.216496	1.81943	LOC108174052
GO:2000786	positive regulation of autophagosome assembly	biological_process	1	3500	4	25472	0.0935832	0.216496	1.81943	LOC114819116
GO:0000056	ribosomal small subunit export from nucleus	biological_process	1	3500	4	25472	0.0935832	0.216496	1.81943	LOC114819237
GO:0033819	lipoyl(octanoyl) transferase activity	molecular_function	1	3500	4	25472	0.0935832	0.216496	1.81943	LOC114819269
GO:0102555	octanoyl transferase activity (acting on glycine-cleavage complex H protein)	molecular_function	1	3500	4	25472	0.0935832	0.216496	1.81943	LOC114819269
GO:0006723	cuticle hydrocarbon biosynthetic process	biological_process	1	3500	4	25472	0.0935832	0.216496	1.81943	LOC114820584
GO:0010368	chloroplast isoamylase complex	cellular_component	1	3500	4	25472	0.0935832	0.216496	1.81943	LOC114822289
GO:1901485	positive regulation of transcription factor catabolic process	biological_process	1	3500	4	25472	0.0935832	0.216496	1.81943	LOC114822607
GO:0031054	pre-miRNA processing	biological_process	1	3500	4	25472	0.0935832	0.216496	1.81943	LOC114822701
GO:0004817	cysteine-tRNA ligase activity	molecular_function	1	3500	4	25472	0.0935832	0.216496	1.81943	LOC114824372
GO:0006423	cysteinyl-tRNA aminoacylation	biological_process	1	3500	4	25472	0.0935832	0.216496	1.81943	LOC114824372
GO:0060188	regulation of protein desumoylation	biological_process	1	3500	4	25472	0.0935832	0.216496	1.81943	LOC114824940
GO:0000506	glycosylphosphatidylinositol-N-acetylglucosaminyltransferase (GPI-GnT) complex	cellular_component	1	3500	4	25472	0.0935832	0.216496	1.81943	LOC114825197
GO:0009892	negative regulation of metabolic process	biological_process	1	3500	4	25472	0.0935832	0.216496	1.81943	MYB111
GO:1905615	positive regulation of developmental vegetative growth	biological_process	1	3500	4	25472	0.0935832	0.216496	1.81943	MYBR15
GO:0010118	stomatal movement	biological_process	7	3500	35	25472	0.0981784	0.226977	1.45554	LOC103406926; LOC103426862; LOC103428062; LOC103435169; LOC103449273; LOC103449617; LOC103453481
GO:0016788	hydrolase activity, acting on ester bonds	molecular_function	19	3500	108	25472	0.0991358	0.22904	1.28034	LOC103400017; LOC103400703; LOC103402642; LOC103404253; LOC103408558; LOC103408674; LOC103410189; LOC103411143; LOC103419398; LOC103420157; LOC103433213; LOC103433603; LOC103442731; LOC103447179; LOC103450964; LOC103452378; LOC114819426; LOC114821121; LOC114823875
GO:0007049	cell cycle	biological_process	36	3500	218	25472	0.100303	0.231584	1.20182	LOC103401008; LOC103406450; LOC103406539; LOC103408168; LOC103412403; LOC103413077; LOC103413641; LOC103415561; LOC103420516; LOC103421063; LOC103423906; LOC103425312; LOC103427052; LOC103428287; LOC103433826; LOC103433937; LOC103434984; LOC103435871; LOC103436078; LOC103439328; LOC103440202; LOC103440279; LOC103443822; LOC103445117; LOC103445887; LOC103445965; LOC103448726; LOC103449277; LOC1034…
GO:0010154	fruit development	biological_process	8	3500	41	25472	0.101138	0.23252	1.42004	LOC103401390; LOC103411183; LOC103415256; LOC103416985; LOC103431299; LOC103442314; LOC103444033; MADS2
GO:0004553	hydrolase activity, hydrolyzing O-glycosyl compounds	molecular_function	8	3500	41	25472	0.101138	0.23252	1.42004	LOC103403007; LOC103409272; LOC103420476; LOC103434536; LOC103437600; LOC103443395; LOC103449997; LOC114822104
GO:0008299	isoprenoid biosynthetic process	biological_process	8	3500	41	25472	0.101138	0.23252	1.42004	LOC103414031; LOC103414696; LOC103421562; LOC103427372; LOC103435174; LOC103448906; LOC103449217; LOC103452258
GO:0015301	anion:anion antiporter activity	molecular_function	5	3500	24	25472	0.10117	0.23252	1.51619	LOC103401023; LOC103402588; LOC103421003; LOC103434544; LOC103451572
GO:0004622	lysophospholipase activity	molecular_function	5	3500	24	25472	0.10117	0.23252	1.51619	LOC103402693; LOC103406163; LOC103424227; LOC103431028; LOC103438266
GO:0006006	glucose metabolic process	biological_process	5	3500	24	25472	0.10117	0.23252	1.51619	LOC103409404; LOC103425757; LOC103442070; LOC103443546; LOC114825363
GO:0006071	glycerol metabolic process	biological_process	5	3500	24	25472	0.10117	0.23252	1.51619	LOC103411114; LOC103415051; LOC103415331; LOC103430075; LOC103454359
GO:0000724	double-strand break repair via homologous recombination	biological_process	13	3500	71	25472	0.101762	0.233728	1.33254	LOC103402628; LOC103411195; LOC103413741; LOC103417767; LOC103426927; LOC103428449; LOC103433335; LOC103435036; LOC103440149; LOC103447829; LOC103448726; LOC108174052; LOC114825962
GO:0030244	cellulose biosynthetic process	biological_process	12	3500	65	25472	0.102719	0.235347	1.34358	LOC103400659; LOC103404652; LOC103417569; LOC103426557; LOC103433737; LOC103437908; LOC103441864; LOC103445301; LOC103452212; LOC103453829; LOC103456364; LOC114823851
GO:0030552	cAMP binding	molecular_function	12	3500	65	25472	0.102719	0.235347	1.34358	LOC103409099; LOC103414450; LOC103426741; LOC103429045; LOC103438334; LOC103438443; LOC103439360; LOC103439584; LOC103442270; LOC103443501; LOC103443879; LOC114825592
GO:0000160	phosphorelay signal transduction system	biological_process	9	3500	47	25472	0.102734	0.235347	1.3936	LOC103400015; LOC103400771; LOC103403589; LOC103422017; LOC103440743; LOC103446932; LOC103447978; LOC103451518; LOC103454584
GO:0031977	thylakoid lumen	cellular_component	9	3500	47	25472	0.102734	0.235347	1.3936	LOC103403404; LOC103406391; LOC103407948; LOC103413454; LOC103414096; LOC103421499; LOC103450963; LOC103456144; LOC114819554
GO:0045489	pectin biosynthetic process	biological_process	11	3500	59	25472	0.103297	0.236482	1.35686	LOC103401242; LOC103402973; LOC103405011; LOC103405188; LOC103416982; LOC103435689; LOC103437913; LOC103442300; LOC103445261; LOC103449230; LOC103455353
GO:0003774	motor activity	molecular_function	6	3500	30	25472	0.107902	0.246702	1.45554	LOC103400446; LOC103405345; LOC103405459; LOC103426601; LOC103427833; LOC103453531
GO:0044183	protein binding involved in protein folding	molecular_function	6	3500	30	25472	0.107902	0.246702	1.45554	LOC103407499; LOC103408530; LOC103425231; LOC103426201; LOC103446745; LOC103450885
GO:0000919	cell plate assembly	biological_process	4	3500	19	25472	0.108799	0.247628	1.53215	LOC103400900; LOC103411867; LOC103445902; LOC114822707
GO:0090430	caffeoyl-CoA: alcohol caffeoyl transferase activity	molecular_function	4	3500	19	25472	0.108799	0.247628	1.53215	LOC103402693; LOC103406163; LOC103431028; LOC103438266
GO:0016682	oxidoreductase activity, acting on diphenols and related substances as donors, oxygen as acceptor	molecular_function	4	3500	19	25472	0.108799	0.247628	1.53215	LOC103406711; LOC103417975; LOC103425161; LOC103452933
GO:0009699	phenylpropanoid biosynthetic process	biological_process	4	3500	19	25472	0.108799	0.247628	1.53215	LOC103418162; LOC103424993; LOC103436695; LOC114823694
GO:0016717	oxidoreductase activity, acting on paired donors, with oxidation of a pair of donors resulting in the reduction of molecular oxygen to two molecules of water	molecular_function	4	3500	19	25472	0.108799	0.247628	1.53215	LOC103419381; LOC103429090; LOC103447381; LOC103447641
GO:0071482	cellular response to light stimulus	biological_process	4	3500	19	25472	0.108799	0.247628	1.53215	LOC103419668; LOC103445157; LOC103447289; LOC103449037
GO:0016324	apical plasma membrane	cellular_component	4	3500	19	25472	0.108799	0.247628	1.53215	LOC103438623; LOC103440210; LOC103441334; LOC103442270
GO:0006629	lipid metabolic process	biological_process	18	3500	103	25472	0.10899	0.247904	1.27183	LOC103404649; LOC103415331; LOC103417509; LOC103418353; LOC103418537; LOC103421679; LOC103429613; LOC103430075; LOC103434560; LOC103438604; LOC103442441; LOC103447141; LOC103447536; LOC103451145; LOC103452605; LOC103454479; LOC103455264; LOC103455875
GO:0005215	transporter activity	molecular_function	13	3500	72	25472	0.111152	0.252658	1.31403	LOC103400207; LOC103400678; LOC103404445; LOC103418467; LOC103426922; LOC103432898; LOC103438057; LOC103439618; LOC103440176; LOC103441956; LOC103446208; LOC103450852; LOC103451145
GO:0000911	cytokinesis by cell plate formation	biological_process	10	3500	54	25472	0.11452	0.254164	1.34772	LOC103403793; LOC103407702; LOC103409844; LOC103426753; LOC103437867; LOC103440003; LOC103441913; LOC103447201; LOC114821175; LOC114825669
GO:0009686	gibberellin biosynthetic process	biological_process	9	3500	48	25472	0.114615	0.254164	1.36457	LOC103400427; LOC103403426; LOC103415767; LOC103419614; LOC103431221; LOC103441678; LOC103444617; LOC103445723; LOC103448353
GO:0045010	actin nucleation	biological_process	3	3500	14	25472	0.114749	0.254164	1.55951	LOC103401294; LOC103429074; LOC114821230
GO:0035529	NADH pyrophosphatase activity	molecular_function	3	3500	14	25472	0.114749	0.254164	1.55951	LOC103405050; LOC103443062; LOC103448292
GO:0010569	regulation of double-strand break repair via homologous recombination	biological_process	3	3500	14	25472	0.114749	0.254164	1.55951	LOC103405483; LOC103421447; LOC114822098
GO:0080110	sporopollenin biosynthetic process	biological_process	3	3500	14	25472	0.114749	0.254164	1.55951	LOC103412848; LOC103412921; LOC103445311
GO:1901601	strigolactone biosynthetic process	biological_process	3	3500	14	25472	0.114749	0.254164	1.55951	LOC103422549; LOC103426424; LOC103426434
GO:0019761	glucosinolate biosynthetic process	biological_process	3	3500	14	25472	0.114749	0.254164	1.55951	LOC103429438; LOC108169884; LOC114820704
GO:0006878	cellular copper ion homeostasis	biological_process	3	3500	14	25472	0.114749	0.254164	1.55951	LOC103443458; LOC103453726; LOC114823685
GO:0031514	motile cilium	cellular_component	2	3500	9	25472	0.114991	0.254164	1.61727	LOC103400446; LOC103426601
GO:0051365	cellular response to potassium ion starvation	biological_process	2	3500	9	25472	0.114991	0.254164	1.61727	LOC103400792; LOC103433849
GO:0006346	methylation-dependent chromatin silencing	biological_process	2	3500	9	25472	0.114991	0.254164	1.61727	LOC103401167; LOC103401564
GO:0030041	actin filament polymerization	biological_process	2	3500	9	25472	0.114991	0.254164	1.61727	LOC103402341; LOC103429074
GO:0040009	regulation of growth rate	biological_process	2	3500	9	25472	0.114991	0.254164	1.61727	LOC103402615; LOC103455440
GO:0090502	RNA phosphodiester bond hydrolysis, endonucleolytic	biological_process	2	3500	9	25472	0.114991	0.254164	1.61727	LOC103402686; LOC103446136
GO:2000071	regulation of defense response by callose deposition	biological_process	2	3500	9	25472	0.114991	0.254164	1.61727	LOC103402819; LOC103426862
GO:0045549	9-cis-epoxycarotenoid dioxygenase activity	molecular_function	2	3500	9	25472	0.114991	0.254164	1.61727	LOC103403002; LOC114820549
GO:0004550	nucleoside diphosphate kinase activity	molecular_function	2	3500	9	25472	0.114991	0.254164	1.61727	LOC103404467; LOC103437370
GO:0006241	CTP biosynthetic process	biological_process	2	3500	9	25472	0.114991	0.254164	1.61727	LOC103404467; LOC103437370
GO:0009939	positive regulation of gibberellic acid mediated signaling pathway	biological_process	2	3500	9	25472	0.114991	0.254164	1.61727	LOC103406741; LOC103423570
GO:1903507	negative regulation of nucleic acid-templated transcription	biological_process	2	3500	9	25472	0.114991	0.254164	1.61727	LOC103407598; LOC103418693
GO:0009612	response to mechanical stimulus	biological_process	2	3500	9	25472	0.114991	0.254164	1.61727	LOC103409272; LOC103437867
GO:0015185	gamma-aminobutyric acid transmembrane transporter activity	molecular_function	2	3500	9	25472	0.114991	0.254164	1.61727	LOC103410140; LOC103415003
GO:0015812	gamma-aminobutyric acid transport	biological_process	2	3500	9	25472	0.114991	0.254164	1.61727	LOC103410140; LOC103415003
GO:0001887	selenium compound metabolic process	biological_process	2	3500	9	25472	0.114991	0.254164	1.61727	LOC103410737; LOC103416410
GO:0009957	epidermal cell fate specification	biological_process	2	3500	9	25472	0.114991	0.254164	1.61727	LOC103419314; LOC114821796
GO:0000082	G1/S transition of mitotic cell cycle	biological_process	2	3500	9	25472	0.114991	0.254164	1.61727	LOC103419327; LOC103420206
GO:0000727	double-strand break repair via break-induced replication	biological_process	2	3500	9	25472	0.114991	0.254164	1.61727	LOC103420206; LOC103428449
GO:0006048	UDP-N-acetylglucosamine biosynthetic process	biological_process	2	3500	9	25472	0.114991	0.254164	1.61727	LOC103422295; LOC103433255
GO:0071277	cellular response to calcium ion	biological_process	2	3500	9	25472	0.114991	0.254164	1.61727	LOC103424576; LOC103437937
GO:0019563	glycerol catabolic process	biological_process	2	3500	9	25472	0.114991	0.254164	1.61727	LOC103426366; LOC103428073
GO:0019243	methylglyoxal catabolic process to D-lactate via S-lactoyl-glutathione	biological_process	2	3500	9	25472	0.114991	0.254164	1.61727	LOC103428562; LOC114819299
GO:0003988	acetyl-CoA C-acyltransferase activity	molecular_function	2	3500	9	25472	0.114991	0.254164	1.61727	LOC103429319; LOC103445421
GO:0009697	salicylic acid biosynthetic process	biological_process	2	3500	9	25472	0.114991	0.254164	1.61727	LOC103430210; LOC103437799
GO:0042300	beta-amyrin synthase activity	molecular_function	2	3500	9	25472	0.114991	0.254164	1.61727	LOC103432258; OSC1
GO:0003724	RNA helicase activity	molecular_function	2	3500	9	25472	0.114991	0.254164	1.61727	LOC103433118; LOC103449968
GO:0042823	pyridoxal phosphate biosynthetic process	biological_process	2	3500	9	25472	0.114991	0.254164	1.61727	LOC103433606; LOC103452951
GO:0071158	positive regulation of cell cycle arrest	biological_process	2	3500	9	25472	0.114991	0.254164	1.61727	LOC103435036; LOC103440279
GO:0016627	oxidoreductase activity, acting on the CH-CH group of donors	molecular_function	2	3500	9	25472	0.114991	0.254164	1.61727	LOC103438572; LOC103455922
GO:0009823	cytokinin catabolic process	biological_process	2	3500	9	25472	0.114991	0.254164	1.61727	LOC103440288; LOC108172967
GO:0016768	spermine synthase activity	molecular_function	2	3500	9	25472	0.114991	0.254164	1.61727	LOC103440896; LOC103455791
GO:0016629	12-oxophytodienoate reductase activity	molecular_function	2	3500	9	25472	0.114991	0.254164	1.61727	LOC103445041; LOC103454377
GO:1901562	response to paraquat	biological_process	2	3500	9	25472	0.114991	0.254164	1.61727	LOC103451145; LOC103456109
GO:0070301	cellular response to hydrogen peroxide	biological_process	2	3500	9	25472	0.114991	0.254164	1.61727	LOC114827515; LOC114827601
GO:0010333	terpene synthase activity	molecular_function	5	3500	25	25472	0.118415	0.261077	1.45554	LIS; LOC103427814; LOC103446592; LOC103448353; LOC114827793
GO:0010267	production of ta-siRNAs involved in RNA interference	biological_process	5	3500	25	25472	0.118415	0.261077	1.45554	LOC103400826; LOC103417323; LOC103451783; LOC114821741; LOC114824597
GO:0009767	photosynthetic electron transport chain	biological_process	5	3500	25	25472	0.118415	0.261077	1.45554	LOC103411985; LOC103452771; LOC103456109; LOC103456307; LOC114819557
GO:0009514	glyoxysome	cellular_component	5	3500	25	25472	0.118415	0.261077	1.45554	LOC103429319; LOC103436249; LOC103445262; LOC103445421; LOC103452890
GO:0031966	mitochondrial membrane	cellular_component	13	3500	73	25472	0.121039	0.266695	1.29603	LOC103402807; LOC103406951; LOC103411183; LOC103415256; LOC103416985; LOC103425906; LOC103431148; LOC103439703; LOC103439704; LOC103440086; LOC103442314; LOC103442460; LOC103450460
GO:0000307	cyclin-dependent protein kinase holoenzyme complex	cellular_component	12	3500	67	25472	0.1231	0.271066	1.30347	LOC103401725; LOC103413641; LOC103431290; LOC103431650; LOC103433937; LOC103435535; LOC103435871; LOC103436189; LOC103436449; LOC103440985; LOC103445887; LOC103448201
GO:0048511	rhythmic process	biological_process	6	3500	31	25472	0.12371	0.272069	1.40859	LOC103403589; LOC103408778; LOC103422468; LOC103437302; LOC103446932; LOC103454120
GO:0004620	phospholipase activity	molecular_function	6	3500	31	25472	0.12371	0.272069	1.40859	LOC103435185; LOC103435274; LOC103445711; LOC103447536; LOC103454479; LOC114819123
GO:0005788	endoplasmic reticulum lumen	cellular_component	10	3500	55	25472	0.126331	0.277418	1.32322	LOC103401648; LOC103425955; LOC103430195; LOC103431531; LOC103443715; LOC103447544; LOC103450675; LOC103450916; LOC103451159; LOC103451917
GO:0031490	chromatin DNA binding	molecular_function	7	3500	37	25472	0.126378	0.277418	1.37686	LOC103400372; LOC103407596; LOC103416566; LOC103416613; LOC103416915; LOC103434093; LOC103446740
GO:0009294	DNA mediated transformation	biological_process	7	3500	37	25472	0.126378	0.277418	1.37686	LOC103401167; LOC103401564; LOC103402159; LOC103402628; LOC103408381; LOC103423170; LOC103425030
GO:0009814	defense response, incompatible interaction	biological_process	8	3500	43	25472	0.127364	0.27906	1.35399	LOC103401375; LOC103415091; LOC103420180; LOC103423778; LOC103436477; LOC103446338; LOC103450713; LOC114821727
GO:0000421	autophagosome membrane	cellular_component	8	3500	43	25472	0.127364	0.27906	1.35399	LOC103411182; LOC103421930; LOC103423593; LOC103433215; LOC103440339; LOC103446456; LOC114819296; LOC114823097
GO:0072583	clathrin-dependent endocytosis	biological_process	8	3500	43	25472	0.127364	0.27906	1.35399	LOC103411182; LOC103419217; LOC103435020; LOC103435175; LOC103437167; LOC103438623; LOC103440339; LOC114824725
GO:0004675	transmembrane receptor protein serine/threonine kinase activity	molecular_function	4	3500	20	25472	0.129473	0.28245	1.45554	LOC103405578; LOC103429688; LOC103443399; LOC103450068
GO:0006744	ubiquinone biosynthetic process	biological_process	4	3500	20	25472	0.129473	0.28245	1.45554	LOC103407620; LOC103435174; LOC103444452; LOC114821119
GO:0005089	Rho guanyl-nucleotide exchange factor activity	molecular_function	4	3500	20	25472	0.129473	0.28245	1.45554	LOC103409419; LOC103440210; LOC103443794; LOC114827641
GO:0051026	chiasma assembly	biological_process	4	3500	20	25472	0.129473	0.28245	1.45554	LOC103411332; LOC103422994; LOC103428449; LOC103433046
GO:0010582	floral meristem determinacy	biological_process	4	3500	20	25472	0.129473	0.28245	1.45554	LOC103416991; LOC103417084; LOC103454562; LOC114824803
GO:0048359	mucilage metabolic process involved in seed coat development	biological_process	4	3500	20	25472	0.129473	0.28245	1.45554	LOC103431288; LOC103454480; LOC103456151; LOC114821462
GO:0003725	double-stranded RNA binding	molecular_function	4	3500	20	25472	0.129473	0.28245	1.45554	LOC103436413; LOC108174913; LOC114819943; LOC114822701
GO:0048367	shoot system development	biological_process	13	3500	74	25472	0.131417	0.285649	1.27852	LOC103403054; LOC103408530; LOC103412703; LOC103421355; LOC103433737; LOC103439873; LOC103439980; LOC103450885; LOC103452013; LOC114819909; LOC114820749; LOC114823875; LOC114823981
GO:0009409	response to cold	biological_process	61	3500	393	25472	0.134752	0.285649	1.12962	LOC103400372; LOC103401038; LOC103401390; LOC103405098; LOC103409272; LOC103410658; LOC103410709; LOC103411183; LOC103411570; LOC103412741; LOC103413400; LOC103413424; LOC103413791; LOC103413933; LOC103415256; LOC103415388; LOC103416597; LOC103416985; LOC103418043; LOC103418570; LOC103419852; LOC103420490; LOC103422167; LOC103424888; LOC103424934; LOC103425702; LOC103427062; LOC103429202; LOC1034…
GO:0009938	negative regulation of gibberellic acid mediated signaling pathway	biological_process	5	3500	26	25472	0.137011	0.285649	1.39956	GATA5; LOC103406741; LOC103407598; LOC103418693; LOC103436166
GO:0003680	AT DNA binding	molecular_function	5	3500	26	25472	0.137011	0.285649	1.39956	LOC103406258; LOC103431703; LOC103435318; LOC103441663; LOC114826108
GO:0055075	potassium ion homeostasis	biological_process	5	3500	26	25472	0.137011	0.285649	1.39956	LOC103408100; LOC103409678; LOC103433849; LOC103436871; LOC103444359
GO:0016787	hydrolase activity	molecular_function	33	3500	205	25472	0.139413	0.285649	1.17153	LOC103402693; LOC103403776; LOC103403831; LOC103406163; LOC103406562; LOC103414031; LOC103414401; LOC103416311; LOC103417985; LOC103421048; LOC103422549; LOC103423570; LOC103424034; LOC103424190; LOC103426424; LOC103426434; LOC103429098; LOC103431028; LOC103431531; LOC103432227; LOC103432281; LOC103433147; LOC103438266; LOC103439600; LOC103441080; LOC103441814; LOC103448292; LOC103449501; LOC1034…
GO:0003968	RNA-directed 5'-3' RNA polymerase activity	molecular_function	3	3500	15	25472	0.140273	0.285649	1.45554	LOC103400708; LOC103444345; LOC103451530
GO:0071944	cell periphery	cellular_component	3	3500	15	25472	0.140273	0.285649	1.45554	LOC103401285; LOC103403957; LOC103416050
GO:0005345	purine nucleobase transmembrane transporter activity	molecular_function	3	3500	15	25472	0.140273	0.285649	1.45554	LOC103401951; LOC103432898; LOC114823391
GO:0006863	purine nucleobase transport	biological_process	3	3500	15	25472	0.140273	0.285649	1.45554	LOC103401951; LOC103432898; LOC114823391
GO:0010115	regulation of abscisic acid biosynthetic process	biological_process	3	3500	15	25472	0.140273	0.285649	1.45554	LOC103403965; LOC103447354; LOC114819149
GO:0071470	cellular response to osmotic stress	biological_process	3	3500	15	25472	0.140273	0.285649	1.45554	LOC103404104; LOC103406245; LOC103423344
GO:0010521	telomerase inhibitor activity	molecular_function	3	3500	15	25472	0.140273	0.285649	1.45554	LOC103408530; LOC103438243; LOC103450885
GO:0015114	phosphate ion transmembrane transporter activity	molecular_function	3	3500	15	25472	0.140273	0.285649	1.45554	LOC103412500; LOC103428150; LOC103452324
GO:0008610	lipid biosynthetic process	biological_process	3	3500	15	25472	0.140273	0.285649	1.45554	LOC103417377; LOC103418537; LOC103451296
GO:0000326	protein storage vacuole	cellular_component	3	3500	15	25472	0.140273	0.285649	1.45554	LOC103418267; LOC103418287; LOC103449988
GO:0015780	nucleotide-sugar transmembrane transport	biological_process	3	3500	15	25472	0.140273	0.285649	1.45554	LOC103420193; LOC103430333; LOC103454480
GO:0010222	stem vascular tissue pattern formation	biological_process	3	3500	15	25472	0.140273	0.285649	1.45554	LOC103432026; LOC103436604; LOC103444820
GO:0008374	O-acyltransferase activity	molecular_function	3	3500	15	25472	0.140273	0.285649	1.45554	LOC103435274; LOC103451162; LOC103455875
GO:0032580	Golgi cisterna membrane	cellular_component	9	3500	50	25472	0.140562	0.285649	1.30999	LOC103407929; LOC103409147; LOC103421788; LOC103422213; LOC103425033; LOC103432596; LOC103435476; LOC103443417; LOC103448450
GO:0004565	beta-galactosidase activity	molecular_function	6	3500	32	25472	0.14062	0.285649	1.36457	BGAL101; LOC103445112; LOC103446465; LOC103447870; LOC103450435; LOC103453563
GO:1902600	proton transmembrane transport	biological_process	6	3500	32	25472	0.14062	0.285649	1.36457	LOC103409678; LOC103415567; LOC103436871; LOC103438572; LOC103449341; LOC114822601
GO:0042335	cuticle development	biological_process	7	3500	38	25472	0.141895	0.285649	1.34063	LOC103415904; LOC103416849; LOC103445586; LOC103449217; LOC103452258; LOC103453148; LOC114820584
GO:0009540	zeaxanthin epoxidase [overall] activity	molecular_function	1	3500	5	25472	0.142054	0.285649	1.45554	LOC103401379
GO:1902025	nitrate import	biological_process	1	3500	5	25472	0.142054	0.285649	1.45554	LOC103402202
GO:0008309	double-stranded DNA exodeoxyribonuclease activity	molecular_function	1	3500	5	25472	0.142054	0.285649	1.45554	LOC103402686
GO:0043765	T/G mismatch-specific endonuclease activity	molecular_function	1	3500	5	25472	0.142054	0.285649	1.45554	LOC103402686
GO:0018454	acetoacetyl-CoA reductase activity	molecular_function	1	3500	5	25472	0.142054	0.285649	1.45554	LOC103403099
GO:0009061	anaerobic respiration	biological_process	1	3500	5	25472	0.142054	0.285649	1.45554	LOC103404213
GO:0000798	nuclear cohesin complex	cellular_component	1	3500	5	25472	0.142054	0.285649	1.45554	LOC103404218
GO:0048639	positive regulation of developmental growth	biological_process	1	3500	5	25472	0.142054	0.285649	1.45554	LOC103405011
GO:1903942	positive regulation of respiratory gaseous exchange	biological_process	1	3500	5	25472	0.142054	0.285649	1.45554	LOC103405011
GO:0000995	RNA polymerase III general transcription initiation factor activity	molecular_function	1	3500	5	25472	0.142054	0.285649	1.45554	LOC103405186
GO:0031463	Cul3-RING ubiquitin ligase complex	cellular_component	1	3500	5	25472	0.142054	0.285649	1.45554	LOC103405253
GO:0051382	kinetochore assembly	biological_process	1	3500	5	25472	0.142054	0.285649	1.45554	LOC103405517
GO:1900034	regulation of cellular response to heat	biological_process	1	3500	5	25472	0.142054	0.285649	1.45554	LOC103405620
GO:1901651	regulation of mitotic chromosome decondensation	biological_process	1	3500	5	25472	0.142054	0.285649	1.45554	LOC103405620
GO:1990188	euchromatin binding	molecular_function	1	3500	5	25472	0.142054	0.285649	1.45554	LOC103405828
GO:0045252	oxoglutarate dehydrogenase complex	cellular_component	1	3500	5	25472	0.142054	0.285649	1.45554	LOC103406342
GO:1900033	negative regulation of trichome patterning	biological_process	1	3500	5	25472	0.142054	0.285649	1.45554	LOC103406741
GO:0005991	trehalose metabolic process	biological_process	1	3500	5	25472	0.142054	0.285649	1.45554	LOC103408057
GO:0004781	sulfate adenylyltransferase (ATP) activity	molecular_function	1	3500	5	25472	0.142054	0.285649	1.45554	LOC103410737
GO:0046475	glycerophospholipid catabolic process	biological_process	1	3500	5	25472	0.142054	0.285649	1.45554	LOC103411114
GO:0009569	chloroplast starch grain	cellular_component	1	3500	5	25472	0.142054	0.285649	1.45554	LOC103412188
GO:0003984	acetolactate synthase activity	molecular_function	1	3500	5	25472	0.142054	0.285649	1.45554	LOC103412455
GO:0006573	valine metabolic process	biological_process	1	3500	5	25472	0.142054	0.285649	1.45554	LOC103412455
GO:0006273	lagging strand elongation	biological_process	1	3500	5	25472	0.142054	0.285649	1.45554	LOC103413077
GO:0070037	rRNA (pseudouridine) methyltransferase activity	molecular_function	1	3500	5	25472	0.142054	0.285649	1.45554	LOC103414415
GO:1905589	positive regulation of L-arginine import across plasma membrane	biological_process	1	3500	5	25472	0.142054	0.285649	1.45554	LOC103415830
GO:1905736	negative regulation of L-proline import across plasma membrane	biological_process	1	3500	5	25472	0.142054	0.285649	1.45554	LOC103415830
GO:0034757	negative regulation of iron ion transport	biological_process	1	3500	5	25472	0.142054	0.285649	1.45554	LOC103416597
GO:0052542	defense response by callose deposition	biological_process	1	3500	5	25472	0.142054	0.285649	1.45554	LOC103417370
GO:0050269	coniferyl-aldehyde dehydrogenase activity	molecular_function	1	3500	5	25472	0.142054	0.285649	1.45554	LOC103418162
GO:0006110	regulation of glycolytic process	biological_process	1	3500	5	25472	0.142054	0.285649	1.45554	LOC103418537
GO:0000706	meiotic DNA double-strand break processing	biological_process	1	3500	5	25472	0.142054	0.285649	1.45554	LOC103419314
GO:0016889	endodeoxyribonuclease activity, producing 3'-phosphomonoesters	molecular_function	1	3500	5	25472	0.142054	0.285649	1.45554	LOC103419314
GO:0031304	intrinsic component of mitochondrial inner membrane	cellular_component	1	3500	5	25472	0.142054	0.285649	1.45554	LOC103419668
GO:0072428	signal transduction involved in intra-S DNA damage checkpoint	biological_process	1	3500	5	25472	0.142054	0.285649	1.45554	LOC103420206
GO:0003979	UDP-glucose 6-dehydrogenase activity	molecular_function	1	3500	5	25472	0.142054	0.285649	1.45554	LOC103420450
GO:0006024	glycosaminoglycan biosynthetic process	biological_process	1	3500	5	25472	0.142054	0.285649	1.45554	LOC103420450
GO:0006065	UDP-glucuronate biosynthetic process	biological_process	1	3500	5	25472	0.142054	0.285649	1.45554	LOC103420450
GO:0019779	Atg8 activating enzyme activity	molecular_function	1	3500	5	25472	0.142054	0.285649	1.45554	LOC103421930
GO:0006047	UDP-N-acetylglucosamine metabolic process	biological_process	1	3500	5	25472	0.142054	0.285649	1.45554	LOC103422295
GO:0034628	'de novo' NAD biosynthetic process from aspartate	biological_process	1	3500	5	25472	0.142054	0.285649	1.45554	LOC103422314
GO:0046975	histone methyltransferase activity (H3-K36 specific)	molecular_function	1	3500	5	25472	0.142054	0.285649	1.45554	LOC103422593
GO:0070544	histone H3-K36 demethylation	biological_process	1	3500	5	25472	0.142054	0.285649	1.45554	LOC103422593
GO:0000814	ESCRT II complex	cellular_component	1	3500	5	25472	0.142054	0.285649	1.45554	LOC103423030
GO:0102970	7-deoxyloganetic acid glucosyltransferase activity	molecular_function	1	3500	5	25472	0.142054	0.285649	1.45554	LOC103423467
GO:0010821	regulation of mitochondrion organization	biological_process	1	3500	5	25472	0.142054	0.285649	1.45554	LOC103425098
GO:0047497	mitochondrion transport along microtubule	biological_process	1	3500	5	25472	0.142054	0.285649	1.45554	LOC103425098
GO:0051377	mannose-ethanolamine phosphotransferase activity	molecular_function	1	3500	5	25472	0.142054	0.285649	1.45554	LOC103425883
GO:0080165	callose deposition in phloem sieve plate	biological_process	1	3500	5	25472	0.142054	0.285649	1.45554	LOC103426254
GO:0080175	phragmoplast microtubule organization	biological_process	1	3500	5	25472	0.142054	0.285649	1.45554	LOC103427553
GO:0008442	3-hydroxyisobutyrate dehydrogenase activity	molecular_function	1	3500	5	25472	0.142054	0.285649	1.45554	LOC103428273
GO:0010373	negative regulation of gibberellin biosynthetic process	biological_process	1	3500	5	25472	0.142054	0.285649	1.45554	LOC103431221
GO:0005432	calcium:sodium antiporter activity	molecular_function	1	3500	5	25472	0.142054	0.285649	1.45554	LOC103431392
GO:0055074	calcium ion homeostasis	biological_process	1	3500	5	25472	0.142054	0.285649	1.45554	LOC103431392
GO:0019953	sexual reproduction	biological_process	1	3500	5	25472	0.142054	0.285649	1.45554	LOC103431460
GO:0015210	uracil transmembrane transporter activity	molecular_function	1	3500	5	25472	0.142054	0.285649	1.45554	LOC103431842
GO:0046656	folic acid biosynthetic process	biological_process	1	3500	5	25472	0.142054	0.285649	1.45554	LOC103432054
GO:0004888	transmembrane signaling receptor activity	molecular_function	1	3500	5	25472	0.142054	0.285649	1.45554	LOC103432575
GO:0015969	guanosine tetraphosphate metabolic process	biological_process	1	3500	5	25472	0.142054	0.285649	1.45554	LOC103432613
GO:0000224	peptide-N4-(N-acetyl-beta-glucosaminyl)asparagine amidase activity	molecular_function	1	3500	5	25472	0.142054	0.285649	1.45554	LOC103432861
GO:0003849	3-deoxy-7-phosphoheptulonate synthase activity	molecular_function	1	3500	5	25472	0.142054	0.285649	1.45554	LOC103432862
GO:0015853	adenine transport	biological_process	1	3500	5	25472	0.142054	0.285649	1.45554	LOC103432898
GO:0015854	guanine transport	biological_process	1	3500	5	25472	0.142054	0.285649	1.45554	LOC103432898
GO:0048029	monosaccharide binding	molecular_function	1	3500	5	25472	0.142054	0.285649	1.45554	LOC103433255
GO:0031436	BRCA1-BARD1 complex	cellular_component	1	3500	5	25472	0.142054	0.285649	1.45554	LOC103435036
GO:0070531	BRCA1-A complex	cellular_component	1	3500	5	25472	0.142054	0.285649	1.45554	LOC103435036
GO:0004816	asparagine-tRNA ligase activity	molecular_function	1	3500	5	25472	0.142054	0.285649	1.45554	LOC103435903
GO:0006421	asparaginyl-tRNA aminoacylation	biological_process	1	3500	5	25472	0.142054	0.285649	1.45554	LOC103435903
GO:0042276	error-prone translesion synthesis	biological_process	1	3500	5	25472	0.142054	0.285649	1.45554	LOC103436119
GO:0051974	negative regulation of telomerase activity	biological_process	1	3500	5	25472	0.142054	0.285649	1.45554	LOC103438243
GO:0017101	aminoacyl-tRNA synthetase multienzyme complex	cellular_component	1	3500	5	25472	0.142054	0.285649	1.45554	LOC103439804
GO:0000172	ribonuclease MRP complex	cellular_component	1	3500	5	25472	0.142054	0.285649	1.45554	LOC103439972
GO:0005655	nucleolar ribonuclease P complex	cellular_component	1	3500	5	25472	0.142054	0.285649	1.45554	LOC103439972
GO:0004347	glucose-6-phosphate isomerase activity	molecular_function	1	3500	5	25472	0.142054	0.285649	1.45554	LOC103440507
GO:0010112	regulation of systemic acquired resistance	biological_process	1	3500	5	25472	0.142054	0.285649	1.45554	LOC103441577
GO:0043226	organelle	cellular_component	1	3500	5	25472	0.142054	0.285649	1.45554	LOC103441751
GO:0010450	inflorescence meristem growth	biological_process	1	3500	5	25472	0.142054	0.285649	1.45554	LOC103444033
GO:0010321	regulation of vegetative phase change	biological_process	1	3500	5	25472	0.142054	0.285649	1.45554	LOC103444443
GO:0009772	photosynthetic electron transport in photosystem II	biological_process	1	3500	5	25472	0.142054	0.285649	1.45554	LOC103444873
GO:0080005	photosystem stoichiometry adjustment	biological_process	1	3500	5	25472	0.142054	0.285649	1.45554	LOC103445157
GO:1905499	trichome papilla formation	biological_process	1	3500	5	25472	0.142054	0.285649	1.45554	LOC103445586
GO:0080185	effector dependent induction by symbiont of host immune response	biological_process	1	3500	5	25472	0.142054	0.285649	1.45554	LOC103446051
GO:1901149	salicylic acid binding	molecular_function	1	3500	5	25472	0.142054	0.285649	1.45554	LOC103446051
GO:0032299	ribonuclease H2 complex	cellular_component	1	3500	5	25472	0.142054	0.285649	1.45554	LOC103446136
GO:0033063	Rad51B-Rad51C-Rad51D-XRCC2 complex	cellular_component	1	3500	5	25472	0.142054	0.285649	1.45554	LOC103447829
GO:0004340	glucokinase activity	molecular_function	1	3500	5	25472	0.142054	0.285649	1.45554	LOC103448288
GO:0019158	mannokinase activity	molecular_function	1	3500	5	25472	0.142054	0.285649	1.45554	LOC103448288
GO:1903338	regulation of cell wall organization or biogenesis	biological_process	1	3500	5	25472	0.142054	0.285649	1.45554	LOC103448997
GO:0010239	chloroplast mRNA processing	biological_process	1	3500	5	25472	0.142054	0.285649	1.45554	LOC103449037
GO:0015840	urea transport	biological_process	1	3500	5	25472	0.142054	0.285649	1.45554	LOC103449988
GO:0042807	central vacuole	cellular_component	1	3500	5	25472	0.142054	0.285649	1.45554	LOC103449988
GO:0010338	leaf formation	biological_process	1	3500	5	25472	0.142054	0.285649	1.45554	LOC103450230
GO:0090227	regulation of red or far-red light signaling pathway	biological_process	1	3500	5	25472	0.142054	0.285649	1.45554	LOC103450907
GO:0004751	ribose-5-phosphate isomerase activity	molecular_function	1	3500	5	25472	0.142054	0.285649	1.45554	LOC103451598
GO:0040034	regulation of development, heterochronic	biological_process	1	3500	5	25472	0.142054	0.285649	1.45554	LOC103451783
GO:0072660	maintenance of protein location in plasma membrane	biological_process	1	3500	5	25472	0.142054	0.285649	1.45554	LOC103454171
GO:0048439	flower morphogenesis	biological_process	1	3500	5	25472	0.142054	0.285649	1.45554	LOC103454562
GO:0009360	DNA polymerase III complex	cellular_component	1	3500	5	25472	0.142054	0.285649	1.45554	LOC103455051
GO:0042306	regulation of protein import into nucleus	biological_process	1	3500	5	25472	0.142054	0.285649	1.45554	LOC108172134
GO:0030371	translation repressor activity	molecular_function	1	3500	5	25472	0.142054	0.285649	1.45554	LOC108173315
GO:0015334	high-affinity oligopeptide transmembrane transporter activity	molecular_function	1	3500	5	25472	0.142054	0.285649	1.45554	LOC108173828
GO:0015833	peptide transport	biological_process	1	3500	5	25472	0.142054	0.285649	1.45554	LOC108173828
GO:0006279	premeiotic DNA replication	biological_process	1	3500	5	25472	0.142054	0.285649	1.45554	LOC108174052
GO:0060359	response to ammonium ion	biological_process	1	3500	5	25472	0.142054	0.285649	1.45554	LOC114820150
GO:0102911	(-)-secoisolariciresinol dehydrogenase activity	molecular_function	1	3500	5	25472	0.142054	0.285649	1.45554	LOC114820167
GO:0071490	cellular response to far red light	biological_process	1	3500	5	25472	0.142054	0.285649	1.45554	LOC114820509
GO:0004385	guanylate kinase activity	molecular_function	1	3500	5	25472	0.142054	0.285649	1.45554	LOC114821010
GO:0036402	proteasome-activating ATPase activity	molecular_function	1	3500	5	25472	0.142054	0.285649	1.45554	LOC114824531
GO:0031543	peptidyl-proline dioxygenase activity	molecular_function	1	3500	5	25472	0.142054	0.285649	1.45554	LOC114824853
GO:0062047	pipecolic acid N-hydroxylase	molecular_function	1	3500	5	25472	0.142054	0.285649	1.45554	LOC114824853
GO:0004351	glutamate decarboxylase activity	molecular_function	1	3500	5	25472	0.142054	0.285649	1.45554	LOC114825422
GO:0006538	glutamate catabolic process	biological_process	1	3500	5	25472	0.142054	0.285649	1.45554	LOC114825422
GO:0009966	regulation of signal transduction	biological_process	1	3500	5	25472	0.142054	0.285649	1.45554	LOC114826182
GO:0060560	developmental growth involved in morphogenesis	biological_process	1	3500	5	25472	0.142054	0.285649	1.45554	MADS2
GO:0005509	calcium ion binding	molecular_function	49	3500	314	25472	0.147572	0.291306	1.13569	LOC103401038; LOC103401220; LOC103402749; LOC103404771; LOC103405142; LOC103407843; LOC103407948; LOC103410658; LOC103411536; LOC103411570; LOC103412309; LOC103414096; LOC103415722; LOC103417451; LOC103417881; LOC103418570; LOC103422380; LOC103424563; LOC103425098; LOC103426580; LOC103428709; LOC103428835; LOC103430595; LOC103431392; LOC103433139; LOC103436384; LOC103436491; LOC103436492; LOC1034…
GO:0080022	primary root development	biological_process	2	3500	10	25472	0.148176	0.291306	1.45554	HD14; HD19
GO:0005929	cilium	cellular_component	2	3500	10	25472	0.148176	0.291306	1.45554	LOC103401149; LOC114826437
GO:0061512	protein localization to cilium	biological_process	2	3500	10	25472	0.148176	0.291306	1.45554	LOC103401149; LOC114826437
GO:0000095	S-adenosyl-L-methionine transmembrane transporter activity	molecular_function	2	3500	10	25472	0.148176	0.291306	1.45554	LOC103402171; LOC103448896
GO:0004832	valine-tRNA ligase activity	molecular_function	2	3500	10	25472	0.148176	0.291306	1.45554	LOC103402408; LOC114822729
GO:0006438	valyl-tRNA aminoacylation	biological_process	2	3500	10	25472	0.148176	0.291306	1.45554	LOC103402408; LOC114822729
GO:0102978	furaneol oxidoreductase activity	molecular_function	2	3500	10	25472	0.148176	0.291306	1.45554	LOC103403010; LOC103442258
GO:0007205	protein kinase C-activating G protein-coupled receptor signaling pathway	biological_process	2	3500	10	25472	0.148176	0.291306	1.45554	LOC103403751; LOC103428056
GO:0006183	GTP biosynthetic process	biological_process	2	3500	10	25472	0.148176	0.291306	1.45554	LOC103404467; LOC103437370
GO:0051090	regulation of DNA-binding transcription factor activity	biological_process	2	3500	10	25472	0.148176	0.291306	1.45554	LOC103404780; LOC103437431
GO:0000778	condensed nuclear chromosome kinetochore	cellular_component	2	3500	10	25472	0.148176	0.291306	1.45554	LOC103405517; LOC103436676
GO:0000170	sphingosine hydroxylase activity	molecular_function	2	3500	10	25472	0.148176	0.291306	1.45554	LOC103406883; LOC114820584
GO:0019827	stem cell population maintenance	biological_process	2	3500	10	25472	0.148176	0.291306	1.45554	LOC103408530; LOC103450885
GO:0010037	response to carbon dioxide	biological_process	2	3500	10	25472	0.148176	0.291306	1.45554	LOC103409241; LOC103410911
GO:0000304	response to singlet oxygen	biological_process	2	3500	10	25472	0.148176	0.291306	1.45554	LOC103412056; LOC103455264
GO:0009690	cytokinin metabolic process	biological_process	2	3500	10	25472	0.148176	0.291306	1.45554	LOC103412527; LOC103438473
GO:0000306	extrinsic component of vacuolar membrane	cellular_component	2	3500	10	25472	0.148176	0.291306	1.45554	LOC103415941; LOC103426785
GO:0010500	transmitting tissue development	biological_process	2	3500	10	25472	0.148176	0.291306	1.45554	LOC103416019; LOC103454360
GO:0071629	cytoplasm protein quality control by the ubiquitin-proteasome system	biological_process	2	3500	10	25472	0.148176	0.291306	1.45554	LOC103416517; LOC103439719
GO:0010104	regulation of ethylene-activated signaling pathway	biological_process	2	3500	10	25472	0.148176	0.291306	1.45554	LOC103419738; LOC103435071
GO:1901672	positive regulation of systemic acquired resistance	biological_process	2	3500	10	25472	0.148176	0.291306	1.45554	LOC103419738; LOC103435071
GO:0070273	phosphatidylinositol-4-phosphate binding	molecular_function	2	3500	10	25472	0.148176	0.291306	1.45554	LOC103425834; LOC103440657
GO:0005881	cytoplasmic microtubule	cellular_component	2	3500	10	25472	0.148176	0.291306	1.45554	LOC103430622; LOC103448669
GO:0019745	pentacyclic triterpenoid biosynthetic process	biological_process	2	3500	10	25472	0.148176	0.291306	1.45554	LOC103432258; OSC1
GO:0072318	clathrin coat disassembly	biological_process	2	3500	10	25472	0.148176	0.291306	1.45554	LOC103435020; LOC103435175
GO:0004556	alpha-amylase activity	molecular_function	2	3500	10	25472	0.148176	0.291306	1.45554	LOC103436491; LOC103436492
GO:0103025	alpha-amylase activity (releasing maltohexaose)	molecular_function	2	3500	10	25472	0.148176	0.291306	1.45554	LOC103436491; LOC103436492
GO:0009249	protein lipoylation	biological_process	2	3500	10	25472	0.148176	0.291306	1.45554	LOC103437830; LOC114819269
GO:0009509	chromoplast	cellular_component	2	3500	10	25472	0.148176	0.291306	1.45554	LOC103440874; LOC103449037
GO:0080183	response to photooxidative stress	biological_process	2	3500	10	25472	0.148176	0.291306	1.45554	LOC103442465; LOC103456109
GO:0008131	primary amine oxidase activity	molecular_function	2	3500	10	25472	0.148176	0.291306	1.45554	LOC103443458; LOC108172967
GO:0042793	plastid transcription	biological_process	2	3500	10	25472	0.148176	0.291306	1.45554	LOC103444030; LOC103445979
GO:0006264	mitochondrial DNA replication	biological_process	2	3500	10	25472	0.148176	0.291306	1.45554	LOC103445715; LOC103446141
GO:0016149	translation release factor activity, codon specific	molecular_function	2	3500	10	25472	0.148176	0.291306	1.45554	LOC103449125; LOC103451161
GO:0007186	G protein-coupled receptor signaling pathway	biological_process	2	3500	10	25472	0.148176	0.291306	1.45554	LOC103455774; LOC114826543
GO:0005763	mitochondrial small ribosomal subunit	cellular_component	2	3500	10	25472	0.148176	0.291306	1.45554	LOC108170670; LOC108173996
GO:0004049	anthranilate synthase activity	molecular_function	2	3500	10	25472	0.148176	0.291306	1.45554	LOC114819708; LOC114823048
GO:0004113	2',3'-cyclic-nucleotide 3'-phosphodiesterase activity	molecular_function	2	3500	10	25472	0.148176	0.291306	1.45554	LOC114821801; LOC114824429
GO:0009187	cyclic nucleotide metabolic process	biological_process	2	3500	10	25472	0.148176	0.291306	1.45554	LOC114821801; LOC114824429
GO:0045723	positive regulation of fatty acid biosynthetic process	biological_process	4	3500	21	25472	0.151767	0.2977	1.38623	LOC103407596; LOC103416566; LOC103416613; LOC103416915
GO:0031982	vesicle	cellular_component	4	3500	21	25472	0.151767	0.2977	1.38623	LOC103435020; LOC103435175; LOC103447762; LOC114826096
GO:0008865	fructokinase activity	molecular_function	4	3500	21	25472	0.151767	0.2977	1.38623	LOC103439109; LOC103439933; LOC103448288; LOC114824331
GO:0015145	monosaccharide transmembrane transporter activity	molecular_function	4	3500	21	25472	0.151767	0.2977	1.38623	LOC103449824; LOC103449825; LOC103449826; SOT2
GO:0035556	intracellular signal transduction	biological_process	25	3500	154	25472	0.154099	0.302106	1.18145	LOC103400515; LOC103403966; LOC103404104; LOC103405015; LOC103407240; LOC103410658; LOC103418706; LOC103421927; LOC103427672; LOC103428709; LOC103428835; LOC103429472; LOC103435169; LOC103437320; LOC103439454; LOC103439710; LOC103442973; LOC103448336; LOC103449743; LOC103450350; LOC103450739; LOC103452734; LOC103453237; LOC114821175; LOC114825669
GO:0016740	transferase activity	molecular_function	31	3500	194	25472	0.155248	0.304189	1.16293	LOC103402923; LOC103402992; LOC103403106; LOC103403793; LOC103406179; LOC103406372; LOC103409998; LOC103410069; LOC103418530; LOC103418723; LOC103419326; LOC103420696; LOC103421048; LOC103430433; LOC103432281; LOC103432920; LOC103436712; LOC103437453; LOC103442623; LOC103443970; LOC103445575; LOC103446592; LOC103447198; LOC103447392; LOC103450749; LOC103451853; LOC103452866; LOC103453629; LOC1034…
GO:0015986	ATP synthesis coupled proton transport	biological_process	5	3500	27	25472	0.156874	0.307204	1.34772	LOC103407484; LOC103434495; LOC103443236; LOC103446721; LOC108174228
GO:0009835	fruit ripening	biological_process	7	3500	39	25472	0.158304	0.309832	1.30626	LOC103403011; LOC103423263; LOC103430893; LOC103434461; LOC103446762; LOC103449773; LOC103451777
GO:0010344	seed oilbody biogenesis	biological_process	6	3500	33	25472	0.158576	0.31002	1.32322	LOC103412083; LOC103431460; LOC103433750; LOC103442261; LOC103446396; LOC114825495
GO:0005811	lipid droplet	cellular_component	6	3500	33	25472	0.158576	0.31002	1.32322	LOC103424227; LOC103431105; LOC103433917; LOC103437610; LOC103442731; LOC103454359
GO:0009408	response to heat	biological_process	34	3500	215	25472	0.161649	0.315852	1.15089	LOC103400659; LOC103402602; LOC103402825; LOC103405620; LOC103406608; LOC103408530; LOC103409272; LOC103409766; LOC103410642; LOC103411570; LOC103417569; LOC103418570; LOC103425955; LOC103431198; LOC103433139; LOC103434783; LOC103438192; LOC103438785; LOC103440246; LOC103441751; LOC103442187; LOC103446261; LOC103446284; LOC103448626; LOC103449107; LOC103449968; LOC103450157; LOC103450675; LOC1034…
GO:0006979	response to oxidative stress	biological_process	47	3500	303	25472	0.162097	0.316553	1.12889	LOC103400741; LOC103402693; LOC103403867; LOC103404306; LOC103404467; LOC103405050; LOC103405974; LOC103406163; LOC103408778; LOC103410246; LOC103410709; LOC103413400; LOC103413735; LOC103415736; LOC103416982; LOC103418467; LOC103422167; LOC103422468; LOC103423133; LOC103424916; LOC103425927; LOC103431028; LOC103433606; LOC103435899; LOC103436247; LOC103436573; LOC103437370; LOC103438266; LOC1034…
GO:0007623	circadian rhythm	biological_process	23	3500	142	25472	0.164168	0.320419	1.17878	GATA5; LOC103401390; LOC103410574; LOC103412999; LOC103418467; LOC103419795; LOC103420490; LOC103422593; LOC103424888; LOC103427062; LOC103428062; LOC103429871; LOC103430935; LOC103431299; LOC103432192; LOC103433175; LOC103434702; LOC103436695; LOC103438439; LOC103443414; LOC103450907; LOC103451676; LOC114823694
GO:0050832	defense response to fungus	biological_process	52	3500	338	25472	0.16724	0.324622	1.11965	LOC103402561; LOC103403450; LOC103403664; LOC103403871; LOC103406519; LOC103406883; LOC103409080; LOC103417234; LOC103417370; LOC103417504; LOC103417600; LOC103417604; LOC103417606; LOC103417777; LOC103420175; LOC103422133; LOC103422305; LOC103422599; LOC103423394; LOC103423459; LOC103423461; LOC103423926; LOC103425033; LOC103425256; LOC103425965; LOC103426522; LOC103426526; LOC103426862; LOC1034…
GO:0070919	production of siRNA involved in chromatin silencing by small RNA	biological_process	3	3500	16	25472	0.167797	0.324622	1.36457	LOC103400708; LOC103444345; LOC103451530
GO:0004630	phospholipase D activity	molecular_function	3	3500	16	25472	0.167797	0.324622	1.36457	LOC103401038; LOC103411956; LOC103451296
GO:0070290	N-acylphosphatidylethanolamine-specific phospholipase D activity	molecular_function	3	3500	16	25472	0.167797	0.324622	1.36457	LOC103401038; LOC103411956; LOC103451296
GO:0010417	glucuronoxylan biosynthetic process	biological_process	3	3500	16	25472	0.167797	0.324622	1.36457	LOC103401242; LOC103416248; LOC103423642
GO:0019748	secondary metabolic process	biological_process	3	3500	16	25472	0.167797	0.324622	1.36457	LOC103401929; LOC103418295; LOC108170803
GO:0010271	regulation of chlorophyll catabolic process	biological_process	3	3500	16	25472	0.167797	0.324622	1.36457	LOC103403965; LOC103416597; LOC103447354
GO:2000068	regulation of defense response to insect	biological_process	3	3500	16	25472	0.167797	0.324622	1.36457	LOC103404780; LOC103437431; LOC103450771
GO:0060969	negative regulation of gene silencing	biological_process	3	3500	16	25472	0.167797	0.324622	1.36457	LOC103405620; LOC103434093; LOC103446740
GO:0042645	mitochondrial nucleoid	cellular_component	3	3500	16	25472	0.167797	0.324622	1.36457	LOC103406342; LOC103445715; LOC103446141
GO:0006301	postreplication repair	biological_process	3	3500	16	25472	0.167797	0.324622	1.36457	LOC103406461; LOC103432923; LOC103438345
GO:0031929	TOR signaling	biological_process	3	3500	16	25472	0.167797	0.324622	1.36457	LOC103415830; LOC114822997; LOC114826182
GO:0005247	voltage-gated chloride channel activity	molecular_function	3	3500	16	25472	0.167797	0.324622	1.36457	LOC103417019; LOC103436006; LOC108171627
GO:0006491	N-glycan processing	biological_process	3	3500	16	25472	0.167797	0.324622	1.36457	LOC103422182; LOC103427489; LOC103437613
GO:0008199	ferric iron binding	molecular_function	3	3500	16	25472	0.167797	0.324622	1.36457	LOC103425927; LOC103455654; LOC114820656
GO:0007098	centrosome cycle	biological_process	3	3500	16	25472	0.167797	0.324622	1.36457	LOC103426555; LOC103427553; LOC103449749
GO:0048481	plant ovule development	biological_process	11	3500	65	25472	0.174981	0.338148	1.23161	LOC103405189; LOC103405834; LOC103414768; LOC103429057; LOC103438207; LOC103438264; LOC103439804; LOC103440279; LOC103440434; LOC103440513; LOC103441806
GO:0009615	response to virus	biological_process	11	3500	65	25472	0.174981	0.338148	1.23161	LOC103412406; LOC103423708; LOC103423778; LOC103431650; LOC103434948; LOC103439396; LOC103443921; LOC103444345; LOC103445887; LOC103450230; LOC103451530
GO:0031177	phosphopantetheine binding	molecular_function	4	3500	22	25472	0.175525	0.338148	1.32322	LOC103409636; LOC103420282; LOC103450648; LOC114820064
GO:0009902	chloroplast relocation	biological_process	4	3500	22	25472	0.175525	0.338148	1.32322	LOC103428062; LOC103441528; LOC103449929; LOC103451689
GO:0006487	protein N-linked glycosylation	biological_process	7	3500	40	25472	0.175556	0.338148	1.2736	LOC103403150; LOC103407929; LOC103417377; LOC103427573; LOC103430439; LOC103431926; LOC103448450
GO:0032508	DNA duplex unwinding	biological_process	7	3500	40	25472	0.175556	0.338148	1.2736	LOC103405483; LOC103413741; LOC103417767; LOC103426927; LOC108169539; LOC114822098; LOC114825962
GO:0004725	protein tyrosine phosphatase activity	molecular_function	7	3500	40	25472	0.175556	0.338148	1.2736	LOC103412602; LOC103417176; LOC103421927; LOC103449848; LOC103451148; LOC103452043; LOC114819116
GO:0010584	pollen exine formation	biological_process	7	3500	40	25472	0.175556	0.338148	1.2736	LOC103412848; LOC103412921; LOC103416248; LOC103432823; LOC103434560; LOC103437230; LOC103445311
GO:0016762	xyloglucan:xyloglucosyl transferase activity	molecular_function	6	3500	34	25472	0.177508	0.341347	1.2843	LOC103403007; LOC103409272; LOC103434536; LOC103443395; LOC103449997; LOC114822104
GO:0005388	calcium-transporting ATPase activity	molecular_function	6	3500	34	25472	0.177508	0.341347	1.2843	LOC103405311; LOC103443052; LOC103443251; LOC103447772; LOC103449500; LOC103451029
GO:0046856	phosphatidylinositol dephosphorylation	biological_process	6	3500	34	25472	0.177508	0.341347	1.2843	LOC103407314; LOC103424617; LOC103426545; LOC103438651; LOC103442305; LOC103448973
GO:0006896	Golgi to vacuole transport	biological_process	5	3500	28	25472	0.177903	0.341361	1.29959	LOC103407702; LOC103444583; LOC103445978; LOC103447201; LOC103449486
GO:1901001	negative regulation of response to salt stress	biological_process	5	3500	28	25472	0.177903	0.341361	1.29959	LOC103413424; LOC103428389; LOC103436434; LOC103448634; MYBR15
GO:0004427	inorganic diphosphatase activity	molecular_function	5	3500	28	25472	0.177903	0.341361	1.29959	LOC103415567; LOC103422349; LOC103426140; LOC103437946; LOC103450198
GO:0010105	negative regulation of ethylene-activated signaling pathway	biological_process	5	3500	28	25472	0.177903	0.341361	1.29959	LOC103421310; LOC103428888; LOC103441678; LOC103445700; LOC114827345
GO:0000278	mitotic cell cycle	biological_process	17	3500	104	25472	0.178073	0.341501	1.18963	LOC103401725; LOC103404218; LOC103420991; LOC103422885; LOC103424256; LOC103427154; LOC103427672; LOC103431290; LOC103435535; LOC103435744; LOC103436189; LOC103436449; LOC103440602; LOC103440985; LOC103448201; LOC103455456; LOC103456394
GO:0005216	ion channel activity	molecular_function	10	3500	59	25472	0.179818	0.343129	1.23351	LOC103409099; LOC103414450; LOC103426741; LOC103427530; LOC103438334; LOC103438443; LOC103439360; LOC103443501; LOC103443879; LOC114825592
GO:0010014	meristem initiation	biological_process	2	3500	11	25472	0.18396	0.343129	1.32322	BZIP18; LOC103441156
GO:0045597	positive regulation of cell differentiation	biological_process	2	3500	11	25472	0.18396	0.343129	1.32322	BZIP18; LOC103441156
GO:0009687	abscisic acid metabolic process	biological_process	2	3500	11	25472	0.18396	0.343129	1.32322	CYP707A; LOC103409417
GO:0009828	plant-type cell wall loosening	biological_process	2	3500	11	25472	0.18396	0.343129	1.32322	LOC103401285; LOC103411772
GO:0010436	carotenoid dioxygenase activity	molecular_function	2	3500	11	25472	0.18396	0.343129	1.32322	LOC103403002; LOC114820549
GO:0016121	carotene catabolic process	biological_process	2	3500	11	25472	0.18396	0.343129	1.32322	LOC103403002; LOC114820549
GO:0003878	ATP citrate synthase activity	molecular_function	2	3500	11	25472	0.18396	0.343129	1.32322	LOC103403033; LOC103438604
GO:0006085	acetyl-CoA biosynthetic process	biological_process	2	3500	11	25472	0.18396	0.343129	1.32322	LOC103403033; LOC103438604
GO:0009346	citrate lyase complex	cellular_component	2	3500	11	25472	0.18396	0.343129	1.32322	LOC103403033; LOC103438604
GO:0090359	negative regulation of abscisic acid biosynthetic process	biological_process	2	3500	11	25472	0.18396	0.343129	1.32322	LOC103403965; LOC103447354
GO:0033613	activating transcription factor binding	molecular_function	2	3500	11	25472	0.18396	0.343129	1.32322	LOC103405828; LOC103446587
GO:0046655	folic acid metabolic process	biological_process	2	3500	11	25472	0.18396	0.343129	1.32322	LOC103405877; LOC103443414
GO:0070413	trehalose metabolism in response to stress	biological_process	2	3500	11	25472	0.18396	0.343129	1.32322	LOC103408057; LOC103437743
GO:0012511	monolayer-surrounded lipid storage body	cellular_component	2	3500	11	25472	0.18396	0.343129	1.32322	LOC103415051; LOC103431460
GO:0030897	HOPS complex	cellular_component	2	3500	11	25472	0.18396	0.343129	1.32322	LOC103415513; LOC103417693
GO:0016281	eukaryotic translation initiation factor 4F complex	cellular_component	2	3500	11	25472	0.18396	0.343129	1.32322	LOC103418114; LOC103443921
GO:0009866	induced systemic resistance, ethylene mediated signaling pathway	biological_process	2	3500	11	25472	0.18396	0.343129	1.32322	LOC103418295; LOC103430997
GO:2001009	regulation of plant-type cell wall cellulose biosynthetic process	biological_process	2	3500	11	25472	0.18396	0.343129	1.32322	LOC103419738; LOC103435071
GO:0043295	glutathione binding	molecular_function	2	3500	11	25472	0.18396	0.343129	1.32322	LOC103422275; LOC108171274
GO:0052746	inositol phosphorylation	biological_process	2	3500	11	25472	0.18396	0.343129	1.32322	LOC103423459; LOC103441763
GO:0055069	zinc ion homeostasis	biological_process	2	3500	11	25472	0.18396	0.343129	1.32322	LOC103424200; LOC103453726
GO:0004462	lactoylglutathione lyase activity	molecular_function	2	3500	11	25472	0.18396	0.343129	1.32322	LOC103428562; LOC114819299
GO:0016477	cell migration	biological_process	2	3500	11	25472	0.18396	0.343129	1.32322	LOC103433516; LOC114821230
GO:0045261	proton-transporting ATP synthase complex, catalytic core F(1)	cellular_component	2	3500	11	25472	0.18396	0.343129	1.32322	LOC103434495; LOC103446721
GO:1905538	polysome binding	molecular_function	2	3500	11	25472	0.18396	0.343129	1.32322	LOC103435864; LOC103451759
GO:1990861	Ubp3-Bre5 deubiquitination complex	cellular_component	2	3500	11	25472	0.18396	0.343129	1.32322	LOC103435864; LOC103451759
GO:0015908	fatty acid transport	biological_process	2	3500	11	25472	0.18396	0.343129	1.32322	LOC103436604; LOC103444820
GO:0008097	5S rRNA binding	molecular_function	2	3500	11	25472	0.18396	0.343129	1.32322	LOC103437774; LOC103452521
GO:0003955	NAD(P)H dehydrogenase (quinone) activity	molecular_function	2	3500	11	25472	0.18396	0.343129	1.32322	LOC103438622; LOC103446600
GO:0009850	auxin metabolic process	biological_process	2	3500	11	25472	0.18396	0.343129	1.32322	LOC103444396; LOC103454135
GO:0033160	positive regulation of protein import into nucleus, translocation	biological_process	2	3500	11	25472	0.18396	0.343129	1.32322	LOC103444893; LOC103445764
GO:0045543	gibberellin 2-beta-dioxygenase activity	molecular_function	2	3500	11	25472	0.18396	0.343129	1.32322	LOC103445723; LOC114823887
GO:0010225	response to UV-C	biological_process	2	3500	11	25472	0.18396	0.343129	1.32322	LOC103448688; LOC103452043
GO:0010050	vegetative phase change	biological_process	2	3500	11	25472	0.18396	0.343129	1.32322	LOC103451783; LOC114824803
GO:0005773	vacuole	cellular_component	102	3500	690	25472	0.193383	0.343129	1.07584	LOC103400276; LOC103401038; LOC103402594; LOC103403071; LOC103404664; LOC103405696; LOC103405700; LOC103406512; LOC103406790; LOC103407786; LOC103407787; LOC103408057; LOC103408080; LOC103409997; LOC103410246; LOC103410792; LOC103411570; LOC103412553; LOC103412999; LOC103413500; LOC103414503; LOC103415331; LOC103415513; LOC103415736; LOC103416673; LOC103416876; LOC103417377; LOC103418091; LOC1034…
GO:0006470	protein dephosphorylation	biological_process	7	3500	41	25472	0.193597	0.343129	1.24254	LOC103411249; LOC103414585; LOC103416597; LOC103420991; LOC103440602; LOC103446261; LOC114819116
GO:1990059	fruit valve development	biological_process	1	3500	6	25472	0.19432	0.343129	1.21295	LOC103401285
GO:0019367	fatty acid elongation, saturated fatty acid	biological_process	1	3500	6	25472	0.19432	0.343129	1.21295	LOC103402375
GO:0034625	fatty acid elongation, monounsaturated fatty acid	biological_process	1	3500	6	25472	0.19432	0.343129	1.21295	LOC103402375
GO:0034626	fatty acid elongation, polyunsaturated fatty acid	biological_process	1	3500	6	25472	0.19432	0.343129	1.21295	LOC103402375
GO:0030742	GTP-dependent protein binding	molecular_function	1	3500	6	25472	0.19432	0.343129	1.21295	LOC103402437
GO:0080115	myosin XI tail binding	molecular_function	1	3500	6	25472	0.19432	0.343129	1.21295	LOC103402437
GO:0102339	3-oxo-arachidoyl-CoA reductase activity	molecular_function	1	3500	6	25472	0.19432	0.343129	1.21295	LOC103403099
GO:0102340	3-oxo-behenoyl-CoA reductase activity	molecular_function	1	3500	6	25472	0.19432	0.343129	1.21295	LOC103403099
GO:0102341	3-oxo-lignoceroyl-CoA reductase activity	molecular_function	1	3500	6	25472	0.19432	0.343129	1.21295	LOC103403099
GO:0102342	3-oxo-cerotoyl-CoA reductase activity	molecular_function	1	3500	6	25472	0.19432	0.343129	1.21295	LOC103403099
GO:0000064	L-ornithine transmembrane transporter activity	molecular_function	1	3500	6	25472	0.19432	0.343129	1.21295	LOC103404777
GO:0000212	meiotic spindle organization	biological_process	1	3500	6	25472	0.19432	0.343129	1.21295	LOC103405828
GO:0006531	aspartate metabolic process	biological_process	1	3500	6	25472	0.19432	0.343129	1.21295	LOC103405859
GO:0042826	histone deacetylase binding	molecular_function	1	3500	6	25472	0.19432	0.343129	1.21295	LOC103406258
GO:0002926	tRNA wobble base 5-methoxycarbonylmethyl-2-thiouridinylation	biological_process	1	3500	6	25472	0.19432	0.343129	1.21295	LOC103408381
GO:2000025	regulation of leaf formation	biological_process	1	3500	6	25472	0.19432	0.343129	1.21295	LOC103408381
GO:0070481	nuclear-transcribed mRNA catabolic process, non-stop decay	biological_process	1	3500	6	25472	0.19432	0.343129	1.21295	LOC103409717
GO:0010235	guard mother cell cytokinesis	biological_process	1	3500	6	25472	0.19432	0.343129	1.21295	LOC103409844
GO:0010343	singlet oxygen-mediated programmed cell death	biological_process	1	3500	6	25472	0.19432	0.343129	1.21295	LOC103412056
GO:0008934	inositol monophosphate 1-phosphatase activity	molecular_function	1	3500	6	25472	0.19432	0.343129	1.21295	LOC103412081
GO:0052832	inositol monophosphate 3-phosphatase activity	molecular_function	1	3500	6	25472	0.19432	0.343129	1.21295	LOC103412081
GO:0052833	inositol monophosphate 4-phosphatase activity	molecular_function	1	3500	6	25472	0.19432	0.343129	1.21295	LOC103412081
GO:0002184	cytoplasmic translational termination	biological_process	1	3500	6	25472	0.19432	0.343129	1.21295	LOC103412304
GO:0050790	regulation of catalytic activity	biological_process	1	3500	6	25472	0.19432	0.343129	1.21295	LOC103412455
GO:0030100	regulation of endocytosis	biological_process	1	3500	6	25472	0.19432	0.343129	1.21295	LOC103413920
GO:0004824	lysine-tRNA ligase activity	molecular_function	1	3500	6	25472	0.19432	0.343129	1.21295	LOC103414768
GO:0006430	lysyl-tRNA aminoacylation	biological_process	1	3500	6	25472	0.19432	0.343129	1.21295	LOC103414768
GO:0031425	chloroplast RNA processing	biological_process	1	3500	6	25472	0.19432	0.343129	1.21295	LOC103414957
GO:0035198	miRNA binding	molecular_function	1	3500	6	25472	0.19432	0.343129	1.21295	LOC103416856
GO:0047874	dolichyldiphosphatase activity	molecular_function	1	3500	6	25472	0.19432	0.343129	1.21295	LOC103417377
GO:0009072	aromatic amino acid family metabolic process	biological_process	1	3500	6	25472	0.19432	0.343129	1.21295	LOC103418426
GO:0046467	membrane lipid biosynthetic process	biological_process	1	3500	6	25472	0.19432	0.343129	1.21295	LOC103418467
GO:1901031	regulation of response to reactive oxygen species	biological_process	1	3500	6	25472	0.19432	0.343129	1.21295	LOC103418467
GO:0004758	serine C-palmitoyltransferase activity	molecular_function	1	3500	6	25472	0.19432	0.343129	1.21295	LOC103418473
GO:0000737	DNA catabolic process, endonucleolytic	biological_process	1	3500	6	25472	0.19432	0.343129	1.21295	LOC103419314
GO:0004845	uracil phosphoribosyltransferase activity	molecular_function	1	3500	6	25472	0.19432	0.343129	1.21295	LOC103419429
GO:0004849	uridine kinase activity	molecular_function	1	3500	6	25472	0.19432	0.343129	1.21295	LOC103419429
GO:0044211	CTP salvage	biological_process	1	3500	6	25472	0.19432	0.343129	1.21295	LOC103419429
GO:0048478	replication fork protection	biological_process	1	3500	6	25472	0.19432	0.343129	1.21295	LOC103420206
GO:0005853	eukaryotic translation elongation factor 1 complex	cellular_component	1	3500	6	25472	0.19432	0.343129	1.21295	LOC103422024
GO:0008428	ribonuclease inhibitor activity	molecular_function	1	3500	6	25472	0.19432	0.343129	1.21295	LOC103422633
GO:0047443	4-hydroxy-4-methyl-2-oxoglutarate aldolase activity	molecular_function	1	3500	6	25472	0.19432	0.343129	1.21295	LOC103422633
GO:0051252	regulation of RNA metabolic process	biological_process	1	3500	6	25472	0.19432	0.343129	1.21295	LOC103422633
GO:0043968	histone H2A acetylation	biological_process	1	3500	6	25472	0.19432	0.343129	1.21295	LOC103424136
GO:0004647	phosphoserine phosphatase activity	molecular_function	1	3500	6	25472	0.19432	0.343129	1.21295	LOC103424563
GO:0004072	aspartate kinase activity	molecular_function	1	3500	6	25472	0.19432	0.343129	1.21295	LOC103425766
GO:0004161	dimethylallyltranstransferase activity	molecular_function	1	3500	6	25472	0.19432	0.343129	1.21295	LOC103426193
GO:0004337	geranyltranstransferase activity	molecular_function	1	3500	6	25472	0.19432	0.343129	1.21295	LOC103426193
GO:0033384	geranyl diphosphate biosynthetic process	biological_process	1	3500	6	25472	0.19432	0.343129	1.21295	LOC103426193
GO:0045337	farnesyl diphosphate biosynthetic process	biological_process	1	3500	6	25472	0.19432	0.343129	1.21295	LOC103426193
GO:0032886	regulation of microtubule-based process	biological_process	1	3500	6	25472	0.19432	0.343129	1.21295	LOC103426347
GO:0031145	anaphase-promoting complex-dependent catabolic process	biological_process	1	3500	6	25472	0.19432	0.343129	1.21295	LOC103427272
GO:0004001	adenosine kinase activity	molecular_function	1	3500	6	25472	0.19432	0.343129	1.21295	LOC103428644
GO:0000271	polysaccharide biosynthetic process	biological_process	1	3500	6	25472	0.19432	0.343129	1.21295	LOC103430782
GO:0033843	xyloglucan 6-xylosyltransferase activity	molecular_function	1	3500	6	25472	0.19432	0.343129	1.21295	LOC103430782
GO:0032786	positive regulation of DNA-templated transcription, elongation	biological_process	1	3500	6	25472	0.19432	0.343129	1.21295	LOC103432312
GO:0008728	GTP diphosphokinase activity	molecular_function	1	3500	6	25472	0.19432	0.343129	1.21295	LOC103432613
GO:1901527	abscisic acid-activated signaling pathway involved in stomatal movement	biological_process	1	3500	6	25472	0.19432	0.343129	1.21295	LOC103433304
GO:0032432	actin filament bundle	cellular_component	1	3500	6	25472	0.19432	0.343129	1.21295	LOC103433321
GO:0051639	actin filament network formation	biological_process	1	3500	6	25472	0.19432	0.343129	1.21295	LOC103433321
GO:0005093	Rab GDP-dissociation inhibitor activity	molecular_function	1	3500	6	25472	0.19432	0.343129	1.21295	LOC103433972
GO:0009062	fatty acid catabolic process	biological_process	1	3500	6	25472	0.19432	0.343129	1.21295	LOC103434903
GO:0052852	very-long-chain-(S)-2-hydroxy-acid oxidase activity	molecular_function	1	3500	6	25472	0.19432	0.343129	1.21295	LOC103435003
GO:0052853	long-chain-(S)-2-hydroxy-long-chain-acid oxidase activity	molecular_function	1	3500	6	25472	0.19432	0.343129	1.21295	LOC103435003
GO:0052854	medium-chain-(S)-2-hydroxy-acid oxidase activity	molecular_function	1	3500	6	25472	0.19432	0.343129	1.21295	LOC103435003
GO:0045717	negative regulation of fatty acid biosynthetic process	biological_process	1	3500	6	25472	0.19432	0.343129	1.21295	LOC103435036
GO:0030091	protein repair	biological_process	1	3500	6	25472	0.19432	0.343129	1.21295	LOC103436573
GO:1902184	negative regulation of shoot apical meristem development	biological_process	1	3500	6	25472	0.19432	0.343129	1.21295	LOC103437546
GO:0016233	telomere capping	biological_process	1	3500	6	25472	0.19432	0.343129	1.21295	LOC103438243
GO:0004534	5'-3' exoribonuclease activity	molecular_function	1	3500	6	25472	0.19432	0.343129	1.21295	LOC103439242
GO:0010587	miRNA catabolic process	biological_process	1	3500	6	25472	0.19432	0.343129	1.21295	LOC103439242
GO:0070878	primary miRNA binding	molecular_function	1	3500	6	25472	0.19432	0.343129	1.21295	LOC103439888
GO:0005751	mitochondrial respiratory chain complex IV	cellular_component	1	3500	6	25472	0.19432	0.343129	1.21295	LOC103440698
GO:0006123	mitochondrial electron transport, cytochrome c to oxygen	biological_process	1	3500	6	25472	0.19432	0.343129	1.21295	LOC103440698
GO:0042776	mitochondrial ATP synthesis coupled proton transport	biological_process	1	3500	6	25472	0.19432	0.343129	1.21295	LOC103440698
GO:0098789	pre-mRNA cleavage required for polyadenylation	biological_process	1	3500	6	25472	0.19432	0.343129	1.21295	LOC103441945
GO:0003854	3-beta-hydroxy-delta5-steroid dehydrogenase activity	molecular_function	1	3500	6	25472	0.19432	0.343129	1.21295	LOC103442495
GO:0080168	abscisic acid transport	biological_process	1	3500	6	25472	0.19432	0.343129	1.21295	LOC103443873
GO:0008525	phosphatidylcholine transporter activity	molecular_function	1	3500	6	25472	0.19432	0.343129	1.21295	LOC103444583
GO:0046246	terpene biosynthetic process	biological_process	1	3500	6	25472	0.19432	0.343129	1.21295	LOC103445375
GO:0097007	4,8,12-trimethyltrideca-1,3,7,11-tetraene synthase activity	molecular_function	1	3500	6	25472	0.19432	0.343129	1.21295	LOC103445375
GO:0097008	(3E)-4,8-dimethyl-1,3,7-nonatriene synthase activity	molecular_function	1	3500	6	25472	0.19432	0.343129	1.21295	LOC103445375
GO:0034720	histone H3-K4 demethylation	biological_process	1	3500	6	25472	0.19432	0.343129	1.21295	LOC103446074
GO:0007006	mitochondrial membrane organization	biological_process	1	3500	6	25472	0.19432	0.343129	1.21295	LOC103447135
GO:0016830	carbon-carbon lyase activity	molecular_function	1	3500	6	25472	0.19432	0.343129	1.21295	LOC103447435
GO:0071494	cellular response to UV-C	biological_process	1	3500	6	25472	0.19432	0.343129	1.21295	LOC103448109
GO:0006734	NADH metabolic process	biological_process	1	3500	6	25472	0.19432	0.343129	1.21295	LOC103448292
GO:0006259	DNA metabolic process	biological_process	1	3500	6	25472	0.19432	0.343129	1.21295	LOC103448688
GO:0030943	mitochondrion targeting sequence binding	molecular_function	1	3500	6	25472	0.19432	0.343129	1.21295	LOC103449181
GO:0015131	oxaloacetate transmembrane transporter activity	molecular_function	1	3500	6	25472	0.19432	0.343129	1.21295	LOC103449341
GO:0015141	succinate transmembrane transporter activity	molecular_function	1	3500	6	25472	0.19432	0.343129	1.21295	LOC103449341
GO:0015729	oxaloacetate transport	biological_process	1	3500	6	25472	0.19432	0.343129	1.21295	LOC103449341
GO:0008333	endosome to lysosome transport	biological_process	1	3500	6	25472	0.19432	0.343129	1.21295	LOC103449486
GO:0031210	phosphatidylcholine binding	molecular_function	1	3500	6	25472	0.19432	0.343129	1.21295	LOC103449704
GO:0005102	signaling receptor binding	molecular_function	1	3500	6	25472	0.19432	0.343129	1.21295	LOC103450605
GO:0016560	protein import into peroxisome matrix, docking	biological_process	1	3500	6	25472	0.19432	0.343129	1.21295	LOC103450605
GO:0030187	melatonin biosynthetic process	biological_process	1	3500	6	25472	0.19432	0.343129	1.21295	LOC103451714
GO:0045770	positive regulation of asymmetric cell division	biological_process	1	3500	6	25472	0.19432	0.343129	1.21295	LOC103452332
GO:0048103	somatic stem cell division	biological_process	1	3500	6	25472	0.19432	0.343129	1.21295	LOC103452332
GO:0019343	cysteine biosynthetic process via cystathionine	biological_process	1	3500	6	25472	0.19432	0.343129	1.21295	LOC103452551
GO:0019346	transsulfuration	biological_process	1	3500	6	25472	0.19432	0.343129	1.21295	LOC103452551
GO:0071266	'de novo' L-methionine biosynthetic process	biological_process	1	3500	6	25472	0.19432	0.343129	1.21295	LOC103452551
GO:0043153	entrainment of circadian clock by photoperiod	biological_process	1	3500	6	25472	0.19432	0.343129	1.21295	LOC103454120
GO:0006164	purine nucleotide biosynthetic process	biological_process	1	3500	6	25472	0.19432	0.343129	1.21295	LOC103454139
GO:0050268	coniferyl-alcohol dehydrogenase activity	molecular_function	1	3500	6	25472	0.19432	0.343129	1.21295	LOC103455003
GO:0006405	RNA export from nucleus	biological_process	1	3500	6	25472	0.19432	0.343129	1.21295	LOC108169236
GO:0034398	telomere tethering at nuclear periphery	biological_process	1	3500	6	25472	0.19432	0.343129	1.21295	LOC108169236
GO:0032790	ribosome disassembly	biological_process	1	3500	6	25472	0.19432	0.343129	1.21295	LOC108169332
GO:1990189	peptide-serine-N-acetyltransferase activity	molecular_function	1	3500	6	25472	0.19432	0.343129	1.21295	LOC108171391
GO:1901006	ubiquinone-6 biosynthetic process	biological_process	1	3500	6	25472	0.19432	0.343129	1.21295	LOC108173107
GO:0006611	protein export from nucleus	biological_process	1	3500	6	25472	0.19432	0.343129	1.21295	LOC114819237
GO:0071486	cellular response to high light intensity	biological_process	1	3500	6	25472	0.19432	0.343129	1.21295	LOC114820509
GO:0071491	cellular response to red light	biological_process	1	3500	6	25472	0.19432	0.343129	1.21295	LOC114820509
GO:0071492	cellular response to UV-A	biological_process	1	3500	6	25472	0.19432	0.343129	1.21295	LOC114820509
GO:0016881	acid-amino acid ligase activity	molecular_function	1	3500	6	25472	0.19432	0.343129	1.21295	LOC114821120
GO:0045739	positive regulation of DNA repair	biological_process	1	3500	6	25472	0.19432	0.343129	1.21295	LOC114822124
GO:0009082	branched-chain amino acid biosynthetic process	biological_process	1	3500	6	25472	0.19432	0.343129	1.21295	LOC114822481
GO:0070402	NADPH binding	molecular_function	1	3500	6	25472	0.19432	0.343129	1.21295	LOC114822481
GO:0033759	flavone synthase activity	molecular_function	1	3500	6	25472	0.19432	0.343129	1.21295	LOC114825244
GO:0034785	salicylate 5-hydroxylase activity	molecular_function	1	3500	6	25472	0.19432	0.343129	1.21295	LOC114825244
GO:0080131	hydroxyjasmonate sulfotransferase activity	molecular_function	1	3500	6	25472	0.19432	0.343129	1.21295	LOC114825478
GO:0009644	response to high light intensity	biological_process	12	3500	73	25472	0.196629	0.344784	1.19634	LOC103403579; LOC103405098; LOC103406608; LOC103409766; LOC103410709; LOC103418467; LOC103429202; LOC103438192; LOC103442465; LOC103451145; LOC103451152; LOC103454275
GO:0009617	response to bacterium	biological_process	25	3500	159	25472	0.196999	0.344784	1.14429	LOC103401068; LOC103405870; LOC103407049; LOC103412608; LOC103415932; LOC103416217; LOC103420911; LOC103422185; LOC103423170; LOC103427842; LOC103427904; LOC103434790; LOC103436251; LOC103441882; LOC103444963; LOC103447762; LOC103449971; LOC103456151; LOC103456175; LOC114821766; LOC114822770; LOC114823246; LOC114825244; LOC114826096; WRKY12
GO:0000103	sulfate assimilation	biological_process	3	3500	17	25472	0.19702	0.344784	1.2843	LOC103401506; LOC103410737; LOC103418455
GO:0016161	beta-amylase activity	molecular_function	3	3500	17	25472	0.19702	0.344784	1.2843	LOC103403788; LOC103417162; LOC103452562
GO:0010158	abaxial cell fate specification	biological_process	3	3500	17	25472	0.19702	0.344784	1.2843	LOC103405834; LOC103438264; LOC103444033
[truncated: 1,522 more rows]
