# Supplementary material for: Expression Profiling Uncovers Novel Genes Associated with Plant Hormone Signal Transduction Involved in Regulation of Anthocyanin Biosynthesis in Red-Fleshed Apple Cultivars
Source: Preprints.org preprint supplement (doi:10.20944/preprints202401.0732.v1), 2024-01-10
Supplement: Supplementary file 4 [file Supplementary_Table S1.xlsx]

## Sheet: Arkusz1
Sample	raw_reads	raw_bases	clean_reads	clean_bases	valid_bases	Q30	GC
Early_Fuji_1	52.71M	7.91G	51.61M	6.87G	86.83%	92.78%	47.37%
Early_Fuji_2	54.47M	8.17G	53.35M	7.12G	87.17%	92.33%	47.33%
Early_Fuji_3	46.64M	7.00G	45.67M	6.06G	86.61%	92.52%	47.38%
Red_Love_1	50.75M	7.61G	49.62M	6.40G	84.01%	92.43%	47.66%
Red_Love_2	55.69M	8.35G	54.53M	7.23G	86.59%	92.37%	47.56%
Red_Love_3	50.06M	7.51G	49.01M	6.53G	86.92%	92.65%	47.47%
